# Supplementary material
Source: publisher figshare collection journal article supplement (https://acs.figshare.com/ndownloader/files/4004371)
Supplement: Supplementary file 1 [file 4004371]

# Efficient NQO1 Substrates are Potent and Selective Anticancer Agents

Elizabeth I. Parkinson, Joseph S. Bair, Megan Cismesia, and Paul J. Hergenrother

Department of Chemistry, Roger Adams Laboratory, University of Illinois at Urbana-Champaign, Urbana, Illinois 61801

## Supplemental Information

### Table of Contents:

|                                   |             |
|-----------------------------------|-------------|
| <b>Supplemental Figure 1.....</b> | <b>S2</b>   |
| <b>Supplemental Figure 2.....</b> | <b>S3</b>   |
| <b>Supplemental Figure 3.....</b> | <b>S4</b>   |
| <b>Supplemental Figure 4.....</b> | <b>S5</b>   |
| <b>Supplemental Figure 5.....</b> | <b>S6</b>   |
| <b>Chemistry .....</b>            | <b>S7</b>   |
| <b>Materials and Methods.....</b> | <b>S7</b>   |
| <b>General Protocols.....</b>     | <b>S7</b>   |
| <b>Tabulated Spectra.....</b>     | <b>S12</b>  |
| <b>Spectra.....</b>               | <b>S55</b>  |
| <b>References.....</b>            | <b>S193</b> |

**Supplemental Figure 1. Redox cycling of DNQ,  $\beta$ -lap, and STN. This experiment is performed as described in the in vitro NQO1 assay. 10  $\mu$ M compound was incubated with NADH (400  $\mu$ M) and recombinant NQO1 (1.4  $\mu$ g/mL) in a 96 well plate (total volume = 200  $\mu$ L). Upon incubation with purified human NQO1 and NADH, each compound utilizes >1 equivalent of NADH (assessed by the absorbance of NADH at  $A_{340\text{nm}}$ ). Shown is representative data in which 2 nmols of DNQ,  $\beta$ -lap, or STN results in the reduction of ~10 nmols of NADH (control = blue, 3 replicates of each compound at 10  $\mu$ M each = red, green, and purple).**

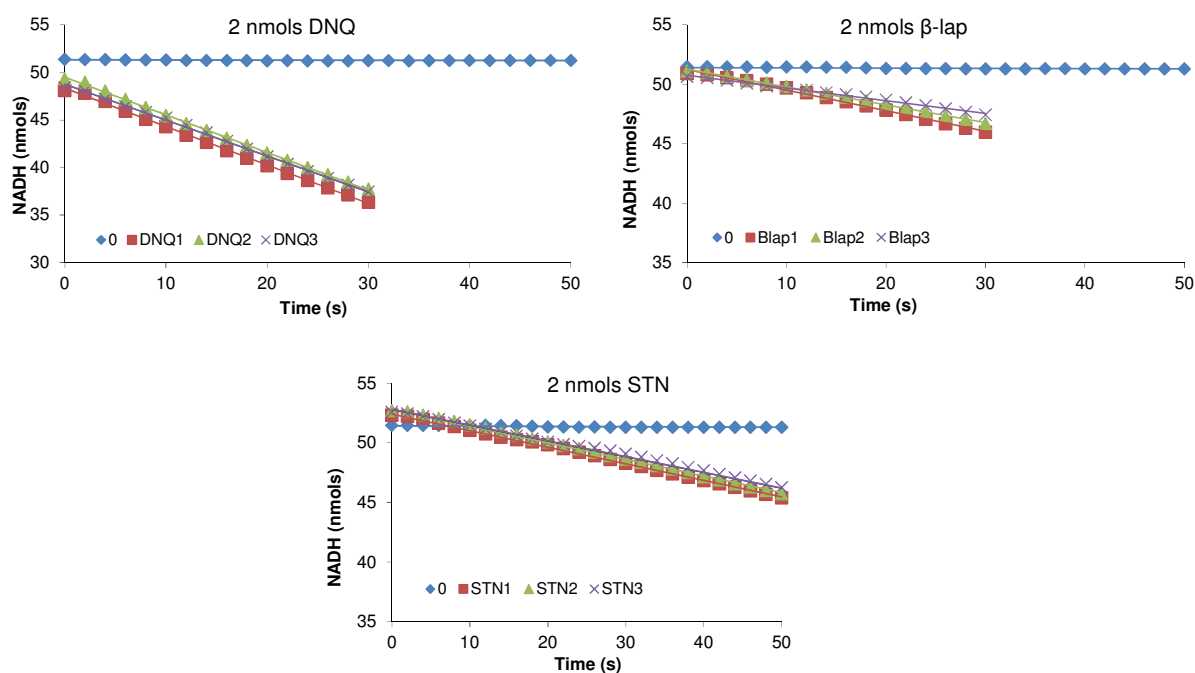

**Supplemental Figure 2. MCF-7 sensitivity to quinones and protection by the NQO1 inhibitor dicoumarol (DIC). Cells were plated at 5000 cells/well in 96 well plates and allowed to attach overnight. They were then treated with quinone  $\pm$  25  $\mu$ M DIC for 2 h. The media was replaced and the cells were allowed to recover for 72 h. Cell death was assessed by the sulforhodamine B assay SRB. DIC = dicoumarol, DNQ = deoxynyboquinone,  $\beta$ -lap =  $\beta$ -lapachone, STN = streptonigrin, MMC = mitomycin C.**

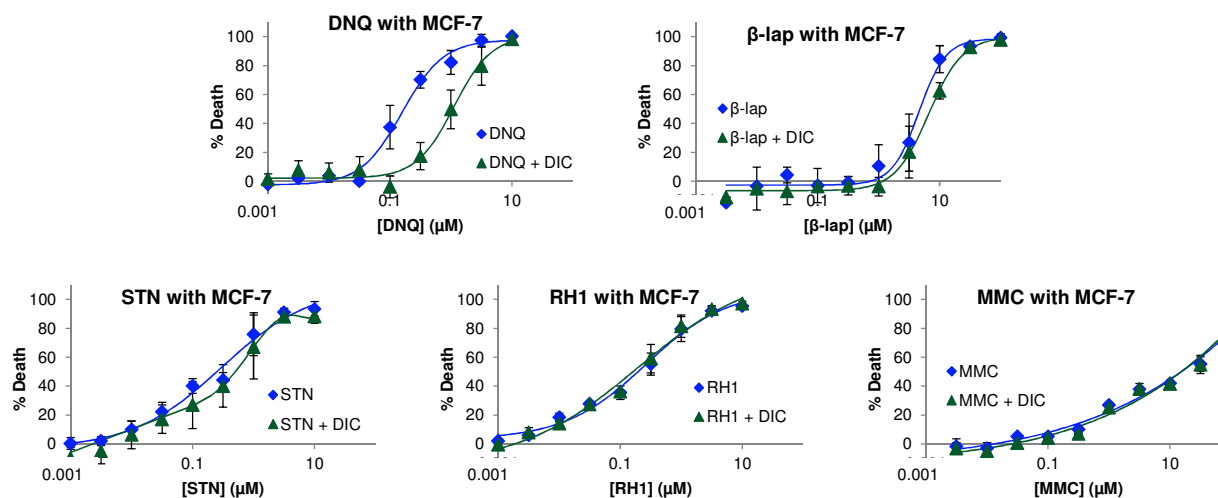

| Compound     | $IC_{50}$ ( $\mu$ M) | $IC_{50}$ with 25 $\mu$ M DIC ( $\mu$ M) | Fold Protection |
|--------------|----------------------|------------------------------------------|-----------------|
| DNQ          | 0.13                 | 1.8                                      | 14              |
| $\beta$ -lap | 3.7                  | 7.9                                      | 2.1             |
| STN          | 0.31                 | 0.5                                      | 1.6             |
| RH1          | 0.21                 | 0.18                                     | 0.86            |
| MMC          | 14.3                 | 14.6                                     | 1.0             |

**Supplemental Figure 3. NQO1 expression and activity in cell lines utilized in the paper. A)** the non-small cell lung cancer cell line A549 and A549 cells which were pre-treated for 2h with 100 nM ES936. **B)** the breast cancer cell line MCF-7 cells, **C)** the breast cancer cell line MDA-MB-231 transfected with empty vector (NQO1-) or with the gene for NQO1 (NQO1+), **D)** the non-small cell lung cancer cell line H596 transfected with empty vector (NQO1-) or with the gene for NQO1 (NQO1+), **E)** the pancreatic cancer cell line Mia PaCa-2 with scrambled control (NS) or with shRNA for NQO1 (shNQO1) , and **F)** the normal lung fibroblast cell line (IMR90).

**A)**

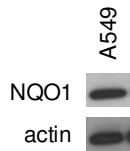

**NQO1 Activity for A549 ± ES936:**

A549 = 2700 nmol/min/μg protein

A549 + ES936 = 24 ± 4 nmol/min/μg

**B)**

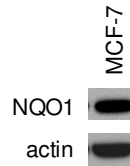

**NQO1 Activity MCF-7:**

NQO1 = 1900 ± 100 nmol/min/μg

**C)**

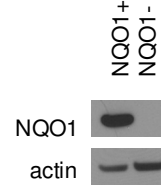

**NQO1 Activity for MDA-MB-231:**

NQO1+ = 1500 ± 60 nmol/min/μg

NQO1- = 13 ± 3 nmol/min/μg

**D)**

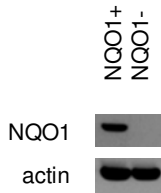

**NQO1 Activity for H596:**

NQO1+ = 1740 ± 70 nmol/min/μg

NQO1- = 30 ± 20 nmol/min/μg

**E)**

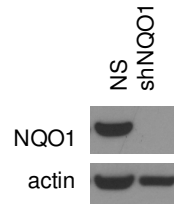

**NQO1 Activity for Mia PaCa2:**

NS = 1130 ± 80 nmol/min/μg

shNQO1 = 87 ± 3 nmol/min/μg

**F)**

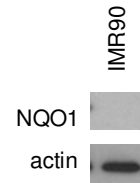

**NQO1 Activity for IMR90:**

NQO1 < 1 nmol/min/μg

**Supplemental Figure 4. A) Cell death curves of 2, 3, 13, or 23 against A) A549 cells treated for 2h in the presence or absence of the NQO1 inhibitor ES936 (100 nM), B) MDA-MB-231 cells that express (NQO1+) or do not express (NQO1-) NQO1, C) H596 cells that express (NQO1+) or do not express (NQO1-) NQO1, D) MIA PaCa-2 cells that have stably express nonsense (NS) or NQO1 (shNQO1) shRNA, and E) the lung fibroblast cell line IMR-90 treated with or without the NQO1 inhibitor dicoumarol (25  $\mu$ M).**

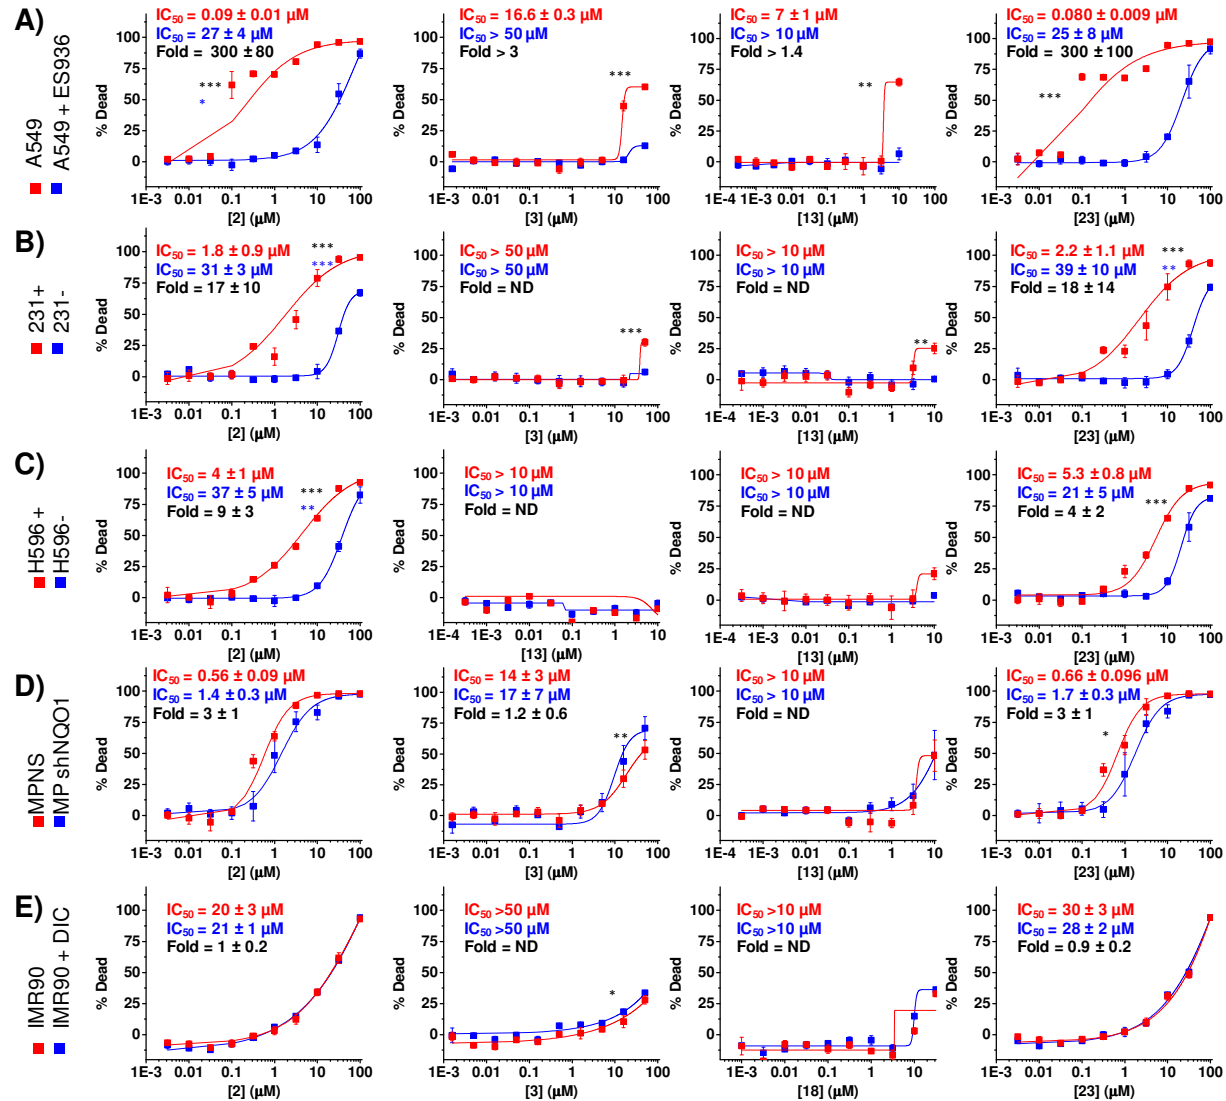

**Supplemental Figure 5. MCF-7 sensitivity to quinones and protection by the NQO1 inhibitor dicoumarol (DIC). Cells were plated at 5000 cells/well in 96 well plates and allowed to attach overnight. They were then treated with quinone  $\pm$  25  $\mu$ M DIC for 2 h. The media was replaced and the cells were allowed to recover for 72 h. Cell death was assessed by the sulforhodamine B assay SRB. DIC = dicoumarol. A) Cell death curves for DNQ derivatives 2, 3, 13, and 23. B) Correlation between catalytic efficiency of a quinones and the fold protection provided by DIC when treating MCF-7 cells. Red points are DNQ and IB-DNQ.**

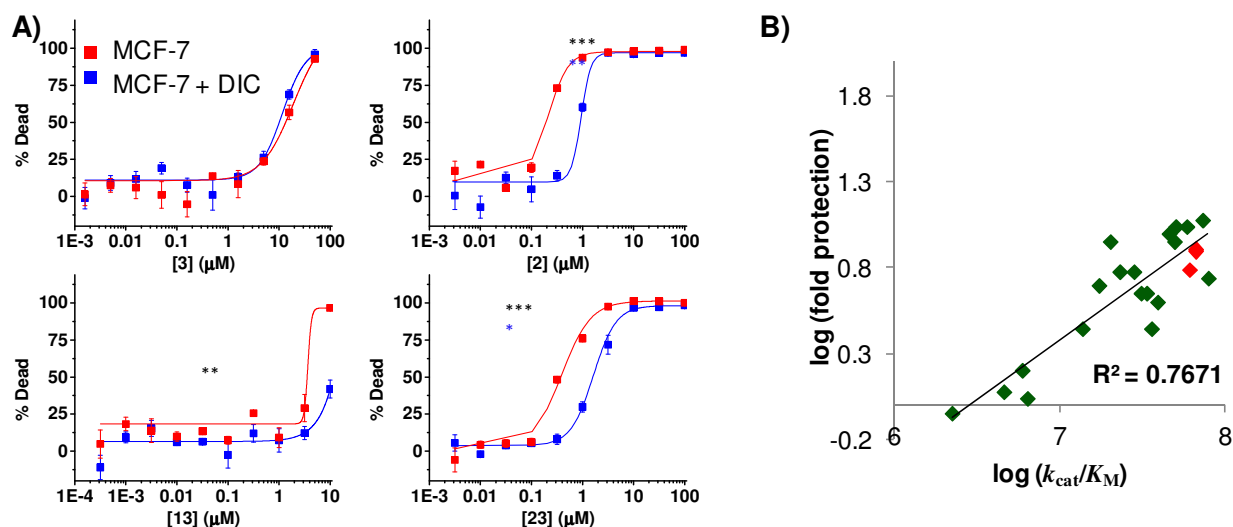

## Materials and Methods

General chemical reagents were purchased from Sigma Aldrich. Metal catalysts and ligands were purchased from Strem Chemicals Inc. (Newburyport, MA). Alkynes were purchased from GFS Chemicals (Powell, OH) and bis-pinacolboronate was purchased from Frontier Scientific (Logan, UT). All reagents were used without further purification unless otherwise noted. Solvents were dried by passage through columns packed with activated alumina (THF, CH<sub>2</sub>Cl<sub>2</sub>, diethyl ether) or activated molecular sieves (DMSO). Amines were freshly distilled over CaH<sub>2</sub> under a nitrogen atmosphere. Reactions involving n-BuLi were performed using standard Schlenk techniques under argon.

<sup>1</sup>H-NMR and <sup>13</sup>C-NMR spectra were recorded on Varian Unity spectrometers at 500 MHz and 125 MHz, respectively. Spectra generated from a solution of CDCl<sub>3</sub> were referenced to residual chloroform (<sup>1</sup>H: δ 7.26 ppm, <sup>13</sup>C: δ 77.16 ppm). Spectra generated in mixtures of CDCl<sub>3</sub> and CD<sub>3</sub>OD were referenced to CD<sub>3</sub>OD (<sup>1</sup>H: δ 3.31 ppm, <sup>13</sup>C: δ 49.0 ppm). Spectra generated from d-TFA were referenced to residual H (<sup>1</sup>H: δ 11.50 ppm) or F<sub>3</sub>CCO<sub>2</sub>D (<sup>13</sup>C: δ 164.2 ppm).

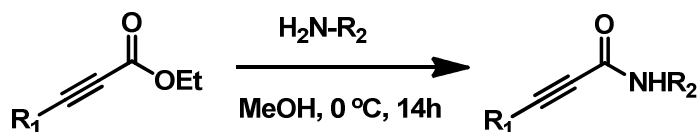

### General protocol A: Amidation of ester

To a solution of alkynyl ester (1 equiv.) in methanol (1 M), chilled in an ice-water bath was added alkyl amine (1.2 equiv.). The reaction was stirred at 0 °C for 14h. The solvent was evaporated directly from the flask and the residue was separated by silica gel chromatography (9:1 hexanes:ethyl acetate to 1:1 hexanes:ethylacetate) to yield the desired alkynyl amide as a mixture of rotamers.

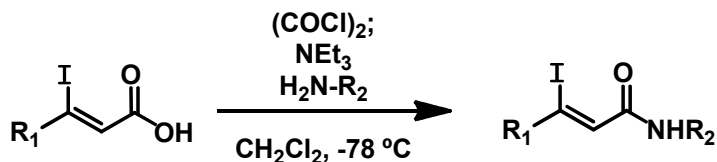

### General protocol B: Amidation of acid chloride

To an oven-dried Schlenk flask with a stirbar was added the iodoacid and the flask was evacuated and backfilled with argon. Dry  $\text{CH}_2\text{Cl}_2$  (0.4 M iodoacid) was added and the solution was chilled on an ice-water bath. Oxalyl chloride (3 equiv.) was added by syringe and the cold bath was removed. After 5h at room temperature the volatile components were evaporated directly from the flask. Dry  $\text{CH}_2\text{Cl}_2$  (0.5 M) was added to the residual oil and the vial was chilled on a dry ice/isopropanol bath. Freshly distilled p-methoxybenzyl amine (1.1 equiv.) was added dropwise by syringe followed by  $\text{NEt}_3$  (1.2 equiv.). The mixture was stirred for 10 minutes then was allowed to warm to RT. 1 M HCl (1.5 mL per mmol) was added and the solution was poured into a separatory funnel with  $\text{CH}_2\text{Cl}_2$  (1.5 mL per mmol), shaken and separated. The aqueous fraction was extracted with  $\text{CH}_2\text{Cl}_2$  (0.8 mL per mmol, 3 times) then dried over  $\text{MgSO}_4$  and evaporated. The residue was purified by silica gel chromatography.

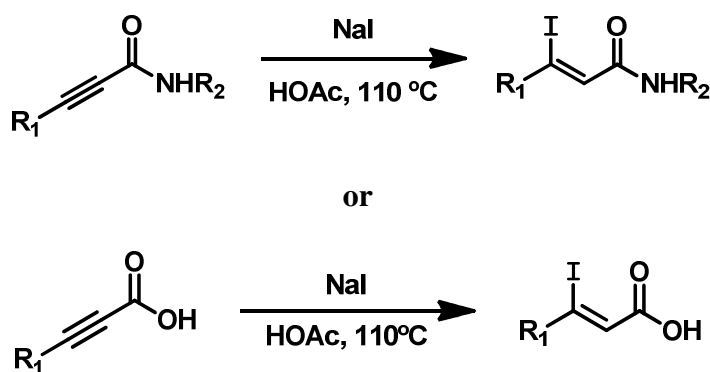

### General protocol C: Hydroiodination

Alkynyl amide (1 equiv.), NaI (2 equiv.), and acetic acid (10 equiv.) were combined and heated to 110 °C for 8h. Reaction completion was determined by removing aliquots for  $^1\text{H}$ -NMR analysis. The deep red reaction mixture was diluted with water (1-2 mL per mmol alkyne) and  $\text{CH}_2\text{Cl}_2$  (3-4 mL per mmol alkyne), treated with  $\text{NaHSO}_3$  until colorless, and carefully neutralized with a saturated aqueous solution of  $\text{NaHCO}_3$ . This mixture was poured into a separatory funnel with  $\text{CH}_2\text{Cl}_2$ , shaken and separated. The aqueous fraction was extracted with  $\text{CH}_2\text{Cl}_2$  (4-5 mL per mmol alkyne, 2 times). The combined organic fractions were washed with brine, dried over  $\text{MgSO}_4$ , and evaporated to yield the desired iodoamide.



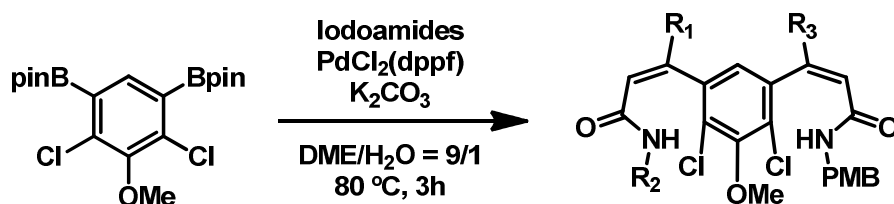

#### General protocol D: Suzuki cross-coupling

To a Schlenk flask with a stir bar was added pure (recrystallized) 2,6-dichloro-3,5-bis(pinacolboronato)anisole (**70**)<sup>1</sup> (1 equiv.), PdCl<sub>2</sub>(dppf) (20 mol%), K<sub>2</sub>CO<sub>3</sub> (6 equiv.), and both desired iodoamides (1.3 equiv. of amide bearing PMB, 1.5 equiv. of *N*-alkyl amide) and the flask was evacuated and backfilled with argon three times. Water (1 mL per mmol bispinacolboronate) and DME (9 mL per mmol bispinacolboronate) were added by syringe after degassing the solvents by bubbling with argon for 45 minutes. The flask was plunged into an oil bath at 80 °C for 3h. The mixture was poured into a separatory funnel and diluted with water (12-13 mL per mmol bispinacolboronate). The mixture was extracted with EtOAc (12-13 mL per mmol bispinacolboronate, 2 times). The combined organic extracts were dried over MgSO<sub>4</sub>, filtered and evaporated to a deep red oil. The crude product was dissolved in CH<sub>2</sub>Cl<sub>2</sub> and separated by silica gel chromatography (100:0 to 70:30 to 30:70 to 0:100 hexanes:ethyl acetate). The purity of the diamide product was highly variable and the product was subjected to intramolecular amidation without further purification.

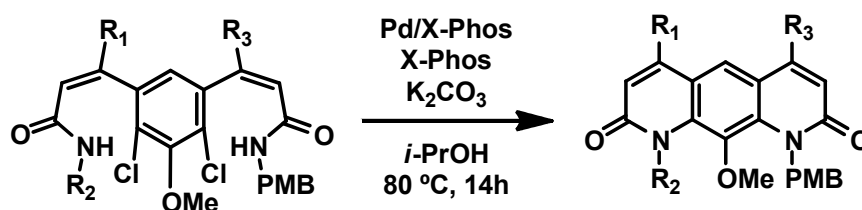

#### General protocol E: Intramolecular aryl amidation

In a Schlenk flask or a vial with a Teflon-lined cap were combined the diamide starting material, K<sub>2</sub>CO<sub>3</sub> (6 equiv.), Pd/X-Phos (10 mol%), and X-Phos (10 mol%). The flask was cycled between vacuum and argon three times and argon-sparged *i*-PrOH (20-30 mL per mmol diamide) was added by syringe. The mixture was heated to 80 °C with stirring for 14h. Insoluble materials

were removed by filtration through Celite and rinsed with CH<sub>2</sub>Cl<sub>2</sub>. The filtrate was evaporated and the residue was used directly in the next step.

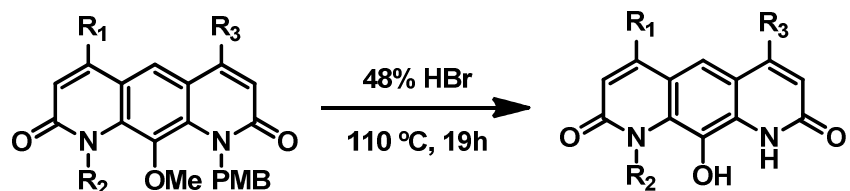

#### General protocol F: HBr deprotection

The crude diazaanthracene was dissolved in 48% HBr (12-13 mL per mmol diazaanthracene) and heated to 110 °C. After 19 hours the reaction was removed from heat. The mixture was cooled on an ice bath and was carefully rendered basic by adding 10 M NaOH. The residual solid was removed by filtration through hardened filter paper and discarded. The filtrate was rendered acidic with 1 M HCl, whereupon a colloidal precipitate formed. The mixture was then centrifuged (3220 x g for 5 minutes). The resulting semi-compact gelatinous solid was collected by filtration through hardened filter paper and dried to a constant mass under vacuum to yield the desired diazaanthracenol in frequently high purity as assessed by NMR.

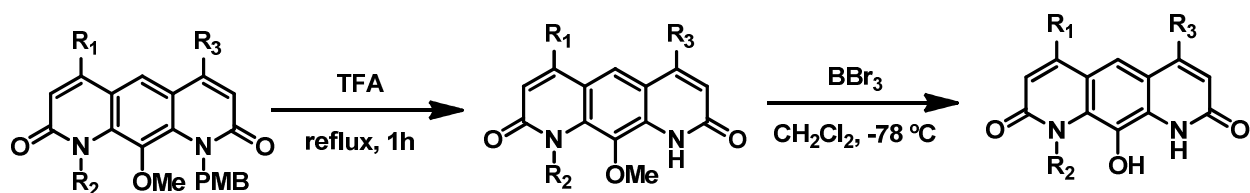

#### General protocol G: TFA and BBr<sub>3</sub> deprotection

For substrates that proved sensitive to global deprotection by HBr, the following protocol was employed.

The product of intramolecular amidation (General Protocol E) was dissolved in TFA (15-20 mL per mmol) and heated to reflux for 1h. The solvent was then evaporated and the residue was purified by silica gel chromatography (DCM, 0-5% MeOH).

In a Schlenk flask containing the PMB-deprotected material under Ar was added DCM (70 mL per mmol) and the solution was cooled in a dry ice/isopropanol bath. BBr<sub>3</sub> (6 equiv.) was added

by syringe and the solution was stirred until starting material was consumed as shown by TLC. Residual  $\text{BBr}_3$  was quenched by the addition of conc.  $\text{NaHCO}_3$  solution until pH neutral. The solvents were evaporated. The residue was taken directly to oxidation (General Protocol H) without further purification.

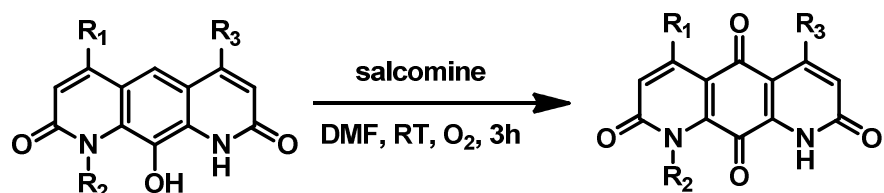

#### General protocol H: Oxidation

To a flask containing the diazaanthracenol starting material was added salcomine (10 mol%) and DMF (~0.02 to 0.04 mL per mg of impure diazaanthracenol). A balloon containing  $\text{O}_2$  was fitted over the mouth of the flask and the slurry was stirred at room temperature. The solid dissolved after about 30 minutes. After 3h stirring, the mixture was diluted with one volume each of DCM and hexanes and loaded directly onto a chromatography column consisting of a layer of basic alumina (5 cm) under a layer of silica gel (5 cm) prepared in DCM. The column was flushed with increasing amounts of methanol (0-2%) in DCM until the red product band entered the alumina layer which retained the product, allowing coeluting impurities to be removed. The product was then released from the basic alumina by adding 1% HOAc to the mobile phase. The red fractions were evaporated and purified by chromatography through silica gel (0-5% MeOH in DCM) to yield the desired DNQ derivative as an orange, red, or red-pink solid.

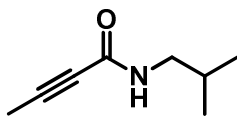

**27**

Synthesized from ethyl-2-butynoate and isobutylamine by General Protocol A. 50% yield. Compound is a light yellow oil at rt.

**<sup>1</sup>H-NMR** (CDCl<sub>3</sub>, 500 MHz): δ 5.78 (bs, 1H, major rotamer, NH), 3.21 (t, 2H, *J* = 6.5 Hz, minor rotamer, NCH<sub>2</sub>), 3.10 (t, 2H, *J* = 6.5 Hz, major rotamer, NCH<sub>2</sub>), 2.01 (s, 3H, minor rotamer, allylic CH<sub>3</sub>), 1.93 (s, 3H, major rotamer, allylic CH<sub>3</sub>), 1.78 (sept, 1H, *J* = 6.5 Hz, major rotamer, CH), 0.94 (d, 6H, *J* = 7.0 Hz, minor rotamer CH(CH<sub>3</sub>)<sub>2</sub>), 0.91 (d, 6H, *J* = 6.5 Hz, major rotamer, CH(CH<sub>3</sub>)<sub>2</sub>)

**<sup>13</sup>C-NMR** (CDCl<sub>3</sub>, 125 MHz) δ 153.68 (major), 83.17 (major), 75.11 (major), 50.90 (minor), 47.15 (major), 29.56 (minor), 28.50 (major), 20.16 (major), 19.96 (minor), 4.13 (minor), 3.80 (major)

**HRMS** (ESI) calcd for C<sub>8</sub>H<sub>14</sub>NO (M+H)<sup>+</sup>: 140.1075, found: 140.1070.

**Melting Point** Not determined (oil).

**IR** (cm<sup>-1</sup>, thin film in CCl<sub>4</sub>): 3450 (w), 3292 (b, m), 3062 (b, w), 2962 (m), 2254 (m), 1654 (s), 1544 (s), 1468 (m) 1275 (m), 1006 (w).

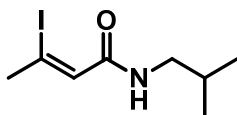

**28**

Synthesized from **27** by General Protocol C. 95% yield. Compound is a yellow/orange solid.

**<sup>1</sup>H-NMR** (CDCl<sub>3</sub>, 500 MHz): δ 6.25 (q, 1H, *J* = 1.0 Hz, vinyl CH), 5.75 (bs, 1H, NH), 3.17 (t, 2H, *J* = 6.5 Hz, NCH<sub>2</sub>), 2.66 (d, 3H, *J* = 1.5 Hz, allylic CH<sub>3</sub>), 1.85 (sept, 1H, *J* = 6.5 Hz, CH), 0.95 (d, 6H, *J* = 6.5 Hz, CH(CH<sub>3</sub>)<sub>2</sub>)

**<sup>13</sup>C-NMR** (CDCl<sub>3</sub>, 125 MHz) δ 165.00, 129.73, 105.42, 46.97, 35.78, 28.50, 20.37.

**HRMS** (ESI-TOF) calcd for  $C_8H_{15}NOI$  ( $M+H$ )<sup>+</sup>: 268.0198, found: 268.0197.

**Melting Point:** 49.3-51.2 °C

**IR** ( $cm^{-1}$ , thin film in  $CHCl_3$ ): 3450 (m), 3280 (b, m), 3060 (b, w), 2962 (m), 1650 (s), 1620 (m), 1430 (w), 1410 (w), 1370 (w), 1330 (w), 1230 (w), 1160 (m).

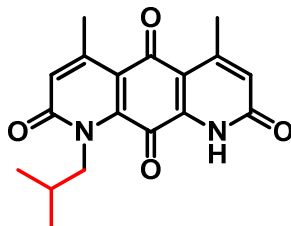

**2**

Synthesized from **70**,<sup>1</sup> (Z)-3-iodo-N-(4-methoxybenzyl)but-2-enamide,<sup>1</sup> and **28** by General Protocols D, E, F, and H. 9% yield over 4 steps. Compound is an orange/red solid at rt.

**<sup>1</sup>H-NMR** ( $CDCl_3$  500 MHz):  $\delta$  6.78 (d, 1H,  $J$  = 1.0 Hz, vinyl  $CH$ ), 6.67 (d, 1H,  $J$  = 1.5 Hz, vinyl  $CH$ ), 4.64 (d, 2H), 2.62 (d, 3H,  $J$  = 1.0 Hz, allylic  $CH_3$ ), 2.60 (d, 3H,  $J$  = 1.0 Hz, allylic  $CH_3$ ), 1.88 (sept, 1H,  $J$  = 7.0 Hz,  $CH$ ), 0.93 (d, 6H,  $J$  = 6.5 Hz,  $CH(CH_3)_2$ ).

**<sup>13</sup>C-NMR** ( $CDCl_3$ , 125 MHz):  $\delta$  181.71, 175.38, 161.47, 160.73, 151.21, 149.01, 138.99, 137.93, 128.64, 128.35, 120.11, 114.49, 50.58, 29.83, 23.49, 22.33, 20.07.

**HRMS** (ESI-TOF) calcd for  $C_{18}H_{19}N_2O_4$  ( $M+H$ )<sup>+</sup>: 327.1345, found: 327.1347.

**Melting Point** >250 °C.

**IR** ( $cm^{-1}$ , thin film in  $CDCl_3$ ): 1676 (m), 1653 (b, s), 1607 (m), 1592 (m), 1467 (w), 1401 (w), 1376 (m), 1350 (w), 1290 (m), 1203 (w), 1101 (w).

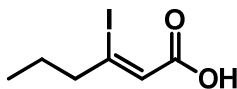

**29**

Synthesized from 2-hexynoic acid by General Protocol C. 83% yield. Compound is an off-white solid at rt.

**<sup>1</sup>H-NMR** (CDCl<sub>3</sub>, 500 MHz): δ 6.40 (t, 1H, *J* = 1.2 Hz, vinyl *CH*), 2.71 (dt, 2H, *J* = 1.2 Hz, 7.2 Hz, allylic *CH*<sub>2</sub>), 1.65 (sext, 2H, *J* = 7.2 Hz, CH<sub>2</sub>CH<sub>2</sub>), 0.93 (t, 3H, *J* = 7.2 Hz, CH<sub>2</sub>CH<sub>3</sub>)

**<sup>13</sup>C-NMR** (CDCl<sub>3</sub>, 125 MHz): δ 169.78, 125.11, 124.62, 50.35, 22.69, 12.83.

**HRMS** (ESI-TOF) calcd for C<sub>6</sub>H<sub>11</sub>NOI (M+Na)<sup>+</sup>: 262.9545, found: 262.9555.

**Melting Point:** 55.2-55.8 °C.

**IR** (cm<sup>-1</sup>, thin film in CDCl<sub>3</sub>): 2964 (b, s), 2709 (m), 2596 (m), 1704 (s), 1616 (s), 1464 (m), 1405 (s), 1311 (s), 1240 (s), 1212 (s).

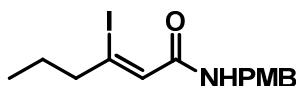

**30**

Synthesized from **29** and 4-methoxybenzylamine by General Protocol B. 99% yield. Compound is an off-white solid.

**<sup>1</sup>H-NMR** (CDCl<sub>3</sub>, 400 MHz): δ 7.23 (d, 2H, *J* = 8.8 Hz, aryl *CH*), 6.84 (d, 2H, *J* = 8.8 Hz, aryl *CH*), 6.26 (s, 1H, vinylic *CH*), 5.96 (bs, 1H, NH), 4.42 (d, 2H, *J* = 5.6 Hz, NCH<sub>2</sub>), 3.77 (s, 3H, OCH<sub>3</sub>), 2.54 (t, 2H, *J* = 7.2 Hz, allylic *CH*<sub>2</sub>), 1.57 (sext, 2H, *J* = 7.2 Hz), 0.88 (t, 3H, *J* = 7.2 Hz)

**<sup>13</sup>C-NMR** (CDCl<sub>3</sub>, 125 MHz): δ 164.85, 159.10, 129.96, 129.49, 128.40, 114.42, 114.10, 55.36, 49.06, 43.15, 22.49, 12.84.

**HRMS** (ESI-TOF) calcd for C<sub>14</sub>H<sub>19</sub>NO<sub>2</sub>I (M+H)<sup>+</sup>: 360.0461, found: 360.0471.

**Melting Point:** 57.2-59.2 °C.

**IR** (cm<sup>-1</sup>, thin film in CDCl<sub>3</sub>): 3421 (b, s), 3262 (s), 3033 (m), 2959 (s), 2835 (w), 1618 (s), 1514 (s), 1460 (m), 1303 (w), 1237 (m), 1177 (w), 1038 (w).

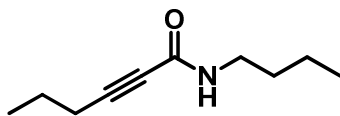

**31**

Synthesized by from ethyl-2-hexynoate and butylamine by General Protocol A. 68% yield. Compound is a pale yellow oil.

**<sup>1</sup>H-NMR** (CDCl<sub>3</sub>, 500 MHz):  $\delta$  6.07 (s, 1H, minor rotamer, NH), 5.95 (s, 1H, major rotamer, NH), 3.35 (dq, 2H, minor rotamer,  $J = 7.0$  Hz, 2.0 Hz, NCH<sub>2</sub>), 3.24 (dq, 2H, major rotamer,  $J = 7.0$  Hz, 2.0 Hz, NCH<sub>2</sub>), 2.22 (dt, 2H,  $J = 7.0$  Hz, 2.0 Hz, allylic CH<sub>2</sub>), 1.54 (dq, 2H,  $J = 7.0$  Hz, 2.0 Hz), 1.46 (quint, 2H,  $J = 7.0$  Hz), 1.32 (sext, 2H,  $J = 7.5$  Hz), 0.96 (dt, 3H,  $J = 7.0$  Hz, 2.0 Hz), 0.88 (dt, 3H,  $J = 7.5$  Hz, 2.0 Hz)

**<sup>13</sup>C-NMR** (CDCl<sub>3</sub>, 125 MHz):  $\delta$  153.68 (major), 93.69 (minor), 86.89 (major), 75.87 (major), 73.56 (minor), 43.14 (minor), 39.59 (major), 32.71 (minor), 31.45 (major), 21.37 (major), 20.60 (major), 20.08 (major), 19.76 (minor), 13.73 (major), 13.56 (major).

**HRMS** (ESI) calcd for C<sub>10</sub>H<sub>15</sub>NO (M+H)<sup>+</sup>: 168.1388, found: 168.1382.

**Melting Point** Not determined (oil).

**IR** (cm<sup>-1</sup>, thin film in CCl<sub>4</sub>): 3588 (m), 3294 (b, m), 3060 (b, w), 2964 (m), 2247 (m), 2221 (m), 1637 (s), 1515 (s), 1460 (m), 1278 (m), 1095 (w).

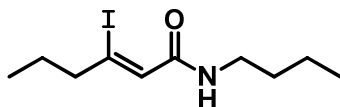

**32**

Synthesized from **31** by General Protocol C. 98% yield. Compound is a yellow/brown oil.

**<sup>1</sup>H-NMR** (CDCl<sub>3</sub>, 500 MHz):  $\delta$  6.26 (s, 1H, vinyl CH), 3.25 (q, 2H,  $J = 7.0$  Hz), 2.51 (t, 2H,  $J = 7.5$  Hz), 1.54 (sext, 2H,  $J = 7.5$  Hz), 1.48 (pent, 2H,  $J = 7.5$  Hz), 1.32 (sext, 2H,  $J = 8.0$  Hz), 0.86 (t, 3H,  $J = 7.0$  Hz), 0.85 (t, 3H,  $J = 7.5$  Hz).

**<sup>13</sup>C-NMR** (CDCl<sub>3</sub>, 125 MHz):  $\delta$  165.13, 128.87, 113.51, 49.01, 39.36, 31.54, 22.51, 20.27, 13.81, 12.83.

**HRMS** (ESI-TOF) calcd for  $C_{10}H_{19}NOI$  ( $M+H$ )<sup>+</sup>: 296.0511, found: 296.0503.

**Melting Point** Not determined (oil).

**IR** ( $cm^{-1}$ , thin film in  $CHCl_3$ ): 3439 (m), 3324 (b, m), 3073 (w), 2965 (m), 1655 (s), 1621 (m), 1467 (m), 1335(w), 1283 (w), 1239 (w), 1204 (w), 1087 (w).

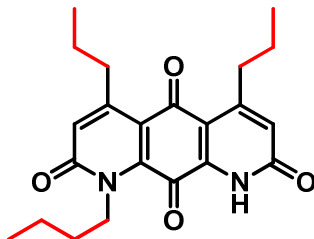

**3**

Synthesized from **70**, **30**, and **32** by General Protocols D, E, F, and H. 13% yield over 4 steps. Compound is a red/pink solid.

**<sup>1</sup>H-NMR** ( $CDCl_3$ , 500 MHz):  $\delta$  9.67 (s, 1H, NH), 6.77 (s, 1H, vinyl CH), 6.68 (s, 1H, vinyl CH), 4.49 (m, 2H), 2.98 (t, 2H,  $J = 7.0$  Hz, allylic  $CH_2$ ), 2.95 (t, 2H,  $J = 7.0$  Hz, allylic  $CH_3$ ), 1.69 (pent, 2H,  $J = 8.5$  Hz, CH), 1.72-1.65 (m, 2H), 1.65-1.55 (m, 4H), 1.47 (sext, 2H,  $J = 7.5$  Hz), 1.03 (t, 3H,  $J = 7.0$  Hz), 1.03 (t, 3H,  $J = 7.5$  Hz), 1.00 (t, 3H,  $J = 7.5$  Hz,  $CH_3$ ).

**<sup>13</sup>C-NMR** ( $CDCl_3$ , 125 MHz):  $\delta$  181.70, 175.33, 161.47, 160.79, 155.34, 153.19, 139.15, 138.01, 127.93, 127.62, 120.10, 114.69, 46.31, 37.09, 36.23, 31.41, 23.25, 22.98, 20.40, 14.28, 14.14, 13.93.

**HRMS** (ESI-TOF) calcd for  $C_{22}H_{27}N_2O_4$  ( $M+H$ )<sup>+</sup>: 383.1971, found: 383.1969.

**Melting Point:** >200 °C.

**IR** ( $cm^{-1}$ , thin film in  $CHCl_3$ ): 2940 (b, w), 1649 (b, s), 1587 (w), 1382 (w), 1299 (w), 1281 (w), 1254 (w).



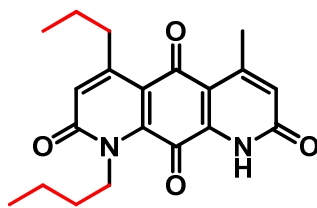

4

Synthesized from **70**, (Z)-3-iodo-N-(4-methoxybenzyl)but-2-enamide, and **32** by General Protocols D, E, F, and H. 6.3% yield over 4 steps. Compound is a pink/red solid at rt.

**<sup>1</sup>H-NMR** (CDCl<sub>3</sub>, 500 MHz): δ 9.46 (s, 1H, NH), 6.77 (s, 1H, vinyl CH), 6.67 (d, 1H, *J* = 1.0 Hz, vinyl CH), 4.50 (m, 2H), 2.97 (t, 2H, *J* = 7.5 Hz, allylic CH<sub>2</sub>), 2.61 (d, 3H, *J* = 1.0 Hz, allylic CH<sub>3</sub>), 1.69 (pent, 2H, *J* = 8.0 Hz), 1.60 (sext, 2H, *J* = 7.5 Hz), 1.47 (sext, 2H, *J* = 8.0 Hz), 1.03 (t, 3H, *J* = 7.5 Hz, CH<sub>3</sub>), 0.99 (t, 3H, *J* = 7.5 Hz, CH<sub>3</sub>).

**<sup>13</sup>C-NMR** (CDCl<sub>3</sub>, 125 MHz): δ 181.73, 175.37, 161.47, 160.91, 153.23, 151.31, 139.49, 137.78, 128.40, 127.82, 119.67, 114.98, 46.35, 39.15, 31.40, 23.14, 22.40, 20.40, 14.28, 13.93.

**HRMS** (ESI-TOF) calcd for C<sub>20</sub>H<sub>23</sub>N<sub>2</sub>O<sub>4</sub> (M+H)<sup>+</sup>: 355.1658, found: 355.1655.

**Melting Point:** >270 °C.

**IR** (cm<sup>-1</sup>, thin film in CDCl<sub>3</sub>): 1680 (m), 1651 (s), 1608 (m), 1535 (w), 1458 (w), 1396 (w), 1368 (w), 1281 (w), 1153 (w), 1108 (w).

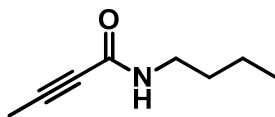

33

Synthesized from ethyl-2-butynoate and butylamine by General Protocol A. 78% yield. Compound is a clear, colorless oil at rt.

**<sup>1</sup>H-NMR** (CDCl<sub>3</sub>, 500 MHz): δ 6.01 (bs, 1H), 3.34 (q, 2H, *J* = 7.0 Hz, minor rotamer NCH<sub>2</sub>), 3.23 (q, 2H, *J* = 6.0 Hz, major rotamer NCH<sub>2</sub>), 1.98 (s, 3H, minor rotamer allylic CH<sub>3</sub>), 1.89 (s, 3H, major rotamer allylic CH<sub>3</sub>), 1.46 (pent, 2H, *J* = 7.0 Hz), 1.31 (sext, 2H, *J* = 7.5 Hz), 0.88 (t, 3H, *J* = 7.5 Hz).

**$^{13}\text{C}$ -NMR** ( $\text{CDCl}_3$ , 125 MHz):  $\delta$  153.71 (major), 89.96 (major), 75.13 (major), 45.15 (minor), 41.57 (major), 23.92 (minor), 22.69 (major), 11.39 (major), 11.18 (minor), 3.69 (major).

**HRMS** (ESI-TOF) calcd for  $\text{C}_8\text{H}_{14}\text{NO}$  ( $\text{M}+\text{H}$ ) $^+$ : 140.1075, found: 140.1071.

**Melting Point** Not determined (oil).

**IR** ( $\text{cm}^{-1}$ , thin film, neat): 3512 (b, w), 3271 (m), 3066 (w), 2954 (m), 2878 (m), 2257 (m), 2216 (w), 1651 (s), 1538 (s), 1285 (m), 1226 (w), 1150 (w).

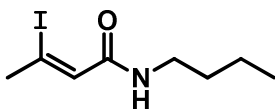

**34**

Synthesized from **33** by General Protocol C. 97% yield. Compound is a light yellow/brown oil.

**$^1\text{H}$ -NMR** ( $\text{CDCl}_3$ , 500 MHz):  $\delta$  6.23 (d, 1H,  $J = 1.5$  Hz, vinyl  $\text{CH}$ ), 3.26 (q, 2H,  $J = 7.0$  Hz,  $\text{NCH}_2$ ), 2.59 (d, 3H,  $J = 1.5$  Hz, allylic  $\text{CH}_3$ ), 1.48 (p, 2H,  $J = 7.5$  Hz), 1.32 (sext, 2H,  $J = 7.5$  Hz), 0.87 (t, 3H,  $J = 7.5$  Hz).

**$^{13}\text{C}$ -NMR** ( $\text{CDCl}_3$ , 125 MHz):  $\delta$  164.93, 129.47, 105.41, 39.35, 35.75, 31.55, 20.26, 13.83.

**HRMS** (ESI-TOF) calcd for  $\text{C}_8\text{H}_{15}\text{NOI}$  ( $\text{M}+\text{H}$ ) $^+$ : 268.0198, found: 268.0197.

**Melting Point** Not determined (oil).

**IR** ( $\text{cm}^{-1}$ , thin film in  $\text{CHCl}_3$ ): 3441 (m), 3324 (b,m), 3073 (b, w), 2965 (m), 1653 (s), 1628 (s), 1515 (s), 1435 (m), 1331 (w), 1269 (w), 1232 (m), 1154 (w), 1080 (w).

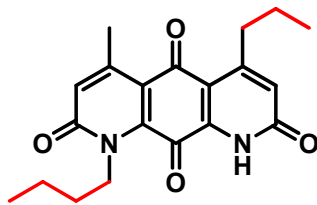

5

Synthesized from **70**, **30**, and **34** by General Protocols D, E, F, and H. 6.7% yield over 4 steps. Compound is a pink/red solid at rt.

**<sup>1</sup>H-NMR** (CDCl<sub>3</sub>, 500 MHz): δ 9.52 (s, 1H, NH), 6.77 (d, 1H, *J* = 1.0 Hz, vinyl CH), 6.68 (s, 1H, vinyl CH), 4.52-4.49 (m, 2H), 2.99 (t, 2H, *J* = 7.5 Hz, allylic CH<sub>2</sub>), 2.59 (d, 3H, *J* = 1.0 Hz, allylic CH<sub>3</sub>), 1.68 (pent, 2H, *J* = 7.5 Hz), 1.61 (sext, 2H, *J* = 8.0 Hz, CH<sub>2</sub>CH<sub>2</sub>CH<sub>3</sub>), 1.47 (sext, 2H, *J* = 8.0 Hz, CH<sub>2</sub>CH<sub>2</sub>CH<sub>3</sub>), 1.04 (t, 3H, *J* = 7.5 Hz, CH<sub>3</sub>), 1.00 (t, 3H, *J* = 7.5 Hz, CH<sub>3</sub>).

**<sup>13</sup>C-NMR** (CDCl<sub>3</sub>, 125 MHz): δ 181.67, 175.28, 161.28, 160.96, 155.41, 149.27, 138.84, 138.25, 128.69, 127.59, 120.12, 114.40, 46.20, 36.30, 31.40, 23.53, 22.88, 20.39, 14.13, 13.92.

**HRMS** (ESI-TOF) calcd for C<sub>20</sub>H<sub>23</sub>N<sub>2</sub>O<sub>4</sub> (M+H)<sup>+</sup>: 355.1658, found: 355.1658.

**Melting Point:** >270 °C.

**IR** (cm<sup>-1</sup>, thin film in CHCl<sub>3</sub>): 1677 (w), 1651 (b, s), 1604 (w), 1555(w), 1455 (w), 1399 (w), 1306 (w), 1285 (w), 1212 (w), 1108 (w).

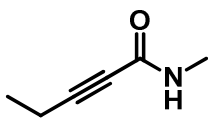

35

Synthesized from ethyl-2-pentynoate and methylamine by General Protocol A. 78% yield. Compound is a yellow oil at rt.

**<sup>1</sup>H-NMR** (CDCl<sub>3</sub>, 500 MHz): δ 5.95 (bs, 1H), 2.99 (d, 3H, *J* = 5.0 Hz, minor rotamer), 2.82 (d, 3H, *J* = 5.0 Hz, major rotamer), 2.37 (t, 2H, *J* = 7.0 Hz, minor rotamer), 2.27 (t, 2H, *J* = 7.0 Hz, major rotamer), 1.20 (t, 3H, *J* = 7.5 Hz, minor rotamer), 1.15 (t, 3H, *J* = 7.5 Hz, major rotamer).

**$^{13}\text{C}$ -NMR** ( $\text{CDCl}_3$ , 125 MHz):  $\delta$  157.11 (minor), 154.40 (major), 95.38 (minor), 87.96 (major), 74.62 (major), 72.25 (minor), 29.56 (minor), 26.17 (major), 12.66 (minor), 12.58 (major), 12.33 (minor), 12.40.

**HRMS** (ESI-TOF) calcd for  $\text{C}_6\text{H}_{10}\text{NO}$  ( $\text{M}+\text{H}$ ) $^+$ : 112.0762, found: 112.0765.

**Melting Point** Not determined (oil).

**IR** ( $\text{cm}^{-1}$ , thin film in  $\text{CHCl}_3$ ): 3501 (w), 3282 (b, m), 3069 (w), 2981 (m), 2259 (m), 2223 (m), 1629 (s), 1540 (s), 1413 (m), 1317 (m), 1286 (m), 1162 (w).

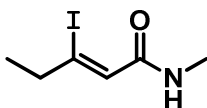

**36**

Synthesized from **35** by General Protocol C. 92% yield. Compound is a yellow/brown oil.

**$^1\text{H}$ -NMR** ( $\text{CDCl}_3$ , 500 MHz):  $\delta$  6.28 (q, 1H,  $J = 1.5$  Hz, vinyl  $\text{CH}$ ), 5.9 (bs, 1H,  $\text{NH}$ ), 2.88 (d, 3H,  $J = 5.0$  Hz,  $\text{NCH}_3$ ), 2.62 (dq, 2H,  $J = 1.5$  Hz, 7.5 Hz, allylic  $\text{CH}_2$ ), 1.11 (t, 3H,  $J = 7.5$  Hz,  $\text{CH}_3$ ).

**$^{13}\text{C}$ -NMR** ( $\text{CDCl}_3$ , 125 MHz):  $\delta$  166.14, 127.91, 115.56, 40.94, 26.39, 14.67.

**HRMS** (ESI-TOF) calcd for  $\text{C}_6\text{H}_{11}\text{NOI}$  ( $\text{M}+\text{H}$ ) $^+$ : 239.9885, found: 239.9885.

**Melting Point** Not determined (oil).

**IR** ( $\text{cm}^{-1}$ , thin film in  $\text{CHCl}_3$ ): 3455 (m), 3323 (b, m), 3082 (b, w), 2978 (m), 1653 (s), 1626 (m), 1524 (m), 1411 (w), 1342 (w), 1292 (w), 1220 (m), 1161 (w), 1069 (w).

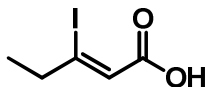

**37**

Synthesized from 2-pentynoic acid by General Protocol C. 91% yield. Compound is an off-white solid.

**<sup>1</sup>H-NMR** (CDCl<sub>3</sub>, 500 MHz): δ 6.40 (t, 1H, *J* = 1.0 Hz, vinyl *CH*), 2.78 (dq, *J* = 7.5 Hz, 1.0 Hz, 2H, allylic *CH*<sub>2</sub>), 1.16 (t, 3H, *J* = 7.5 Hz, CH<sub>2</sub>CH<sub>3</sub>)

**<sup>13</sup>C-NMR** (CDCl<sub>3</sub>, 125 MHz): δ 169.66, 126.56, 123.62, 42.36, 14.72.

**HRMS** (ESI-TOF) calcd for C<sub>5</sub>H<sub>7</sub>NOI (M+H)<sup>+</sup>: 225.9491, found: 225.9507.

**Melting Point:** 67.0-67.9 °C.

**IR** (cm<sup>-1</sup>, thin film in CHCl<sub>3</sub>): 3233 (b, m), 2703 (w), 2578 (w), 1694 (s), 1626 (s), 1455 (m), 1418 (w), 1310 (w), 1237 (m), 1077 (w).

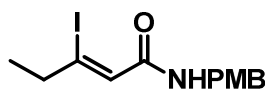

**38**

Synthesized from **37** and 4-methoxybenzylamine by General Protocol B. 84% yield. Compound is an off-white/light yellow solid.

**<sup>1</sup>H-NMR** (CDCl<sub>3</sub>, 400 MHz): δ 7.23 (d, 2H, *J* = 8.4 Hz, aryl *CH*), 6.83 (d, 2H, *J* = 8.8 Hz, aryl *CH*), 6.26 (s, 1H, vinylic *CH*), 6.01 (bs, 1H, NH), 4.42 (d, 2H, *J* = 5.6 Hz, NCH<sub>2</sub>), 3.76 (s, 3H, OCH<sub>3</sub>), 2.61 (q, 2H, *J* = 7.6 Hz, allylic *CH*<sub>2</sub>), 1.08 (t, 3H, *J* = 7.2 Hz)

**<sup>13</sup>C-NMR** (CDCl<sub>3</sub>, 125 MHz): δ 165.00, 159.04, 129.95, 129.44, 127.41, 115.90, 114.06, 55.34, 43.11, 40.91, 14.55.

**HRMS** (ESI-TOF) calcd for C<sub>13</sub>H<sub>17</sub>NO<sub>2</sub>I (M+H)<sup>+</sup>: 346.0304, found: 346.0308.

**Melting Point:** 60.7-63.3 °C.

**IR** (cm<sup>-1</sup>, thin film in CDCl<sub>3</sub>): 3519 (w), 3283 (b, s), 3059 (m), 2970 (m), 2834 (m), 1651 (s), 1505 (s), 1455 (m), 1250 (m), 1175 (m), 1033 (m).

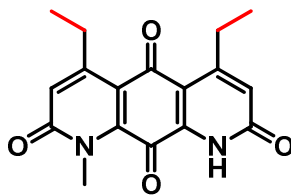

6

Synthesized from **70**, **36**, and **38** by General Protocols D, E, F, and H. 17% yield over 4 steps. Compound is a pink amorphous solid.

**<sup>1</sup>H-NMR** (CDCl<sub>3</sub>, 500 MHz): δ 10.28 (bs, 1H), 6.83 (s, 1H, vinyl CH), 6.75 (s, 1H, vinyl CH), 3.93 (s, 3H), 3.07 (dq, 2H, *J* = 7.5 Hz, 1.0 Hz), 3.04 (dq, 2H, *J* = 7.5 Hz, 1.0 Hz), 1.25 (t, 3H, *J* = 7.5 Hz), 1.24 (t, 3H, *J* = 7.5 Hz).

**<sup>13</sup>C-NMR** (2:1 CDCl<sub>3</sub>:CD<sub>3</sub>OD, 125 MHz): δ 181.29, 175.34, 162.29, 162.15, 157.28, 155.52, 140.00, 138.78, 33.96, 27.90, 27.27, 13.62, 13.34.

**HRMS** (ESI-TOF) calcd for C<sub>17</sub>H<sub>17</sub>N<sub>2</sub>O<sub>4</sub> (M+H)<sup>+</sup>: 313.1188, found: 313.1193.

**Melting Point:** >280 °C.

**IR** (cm<sup>-1</sup>, thin film in CDCl<sub>3</sub>): 1684 (w), 1648 (s), 1604 (w), 1580 (w), 1507 (w), 1406 (w), 1363 (w), 1289 (w), 1153 (w), 1101 (w).

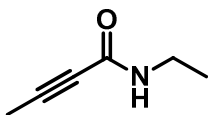

39

Synthesized from ethyl-2-butyrate and ethylamine by General Protocol A. 83% yield. Compound is a pale yellow oil.

**<sup>1</sup>H-NMR** (CDCl<sub>3</sub>, 500 MHz): δ 6.25 (bs, 1H), 3.35 (pent, 2H, *J* = 7.0 Hz, minor rotamer NCH<sub>2</sub>), 3.23 (pent, 2H, *J* = 7.5 Hz, major rotamer), 1.95 (s, 3H, minor rotamer), 1.85 (s, 3H, major rotamer), 1.12 (t, 3H, *J* = 7.5 Hz, minor rotamer), 1.08 (t, 3H, *J* = 7.0 Hz, major rotamer).

**<sup>13</sup>C-NMR** (CDCl<sub>3</sub>, 125 MHz): δ 153.58 (major), 82.80 (major), 75.05 (major), 38.20 (minor), 34.66 (major), 15.91 (minor), 14.51 (major), 3.93 (minor), 3.59 (major).

**HRMS** (ESI) calcd for C<sub>6</sub>H<sub>10</sub>NO (M+H)<sup>+</sup>: 112.0762, found: 112.0764.

**Melting Point** Not determined (oil).

**IR** (cm<sup>-1</sup>, neat): 3438 (m), 3291 (b, m), 3066 (b, w), 2983 (m), 2240 (m), 2209 (m), 1641 (s), 1520 (s), 1437 (m), 1379 (w), 1283 (m), 1149 (w).

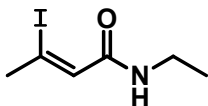

**40**

Synthesized from **39** by General Protocol C. 98% yield. Compound is a pale yellow/brown oil.

**<sup>1</sup>H-NMR** (CDCl<sub>3</sub>, 500 MHz): δ 6.28 (bs, 1H, NH), 6.22 (s, 1H, vinyl CH), 3.30 (pent, 2H, *J* = 7.5 Hz, NCH<sub>2</sub>), 2.59 (s, 3H, allylic CH<sub>3</sub>), 1.12 (s, 3H).

**<sup>13</sup>C-NMR** (CDCl<sub>3</sub>, 125 MHz): δ 164.85, 129.28, 105.58, 35.75, 34.45, 14.74.

**HRMS** (ESI-TOF) calcd for C<sub>6</sub>H<sub>11</sub>NOI (M+H)<sup>+</sup>: 139.9885, found: 139.9884.

**Melting Point** Not determined (oil).

**IR** (cm<sup>-1</sup>, thin film in CHCl<sub>3</sub>): 3441 (m), 3322 (b, m), 3073 (b,w), 2976 (m), 1653 (s), 1626 (m), 1515 (m), 1432 (m), 1375 (w), 1326 (w), 1269 (w), 1211 (m), 1152 (w), 1080 (m).

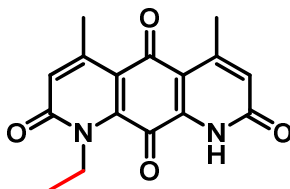

**7**

Synthesized from **70**, (Z)-3-iodo-N-(4-methoxybenzyl)but-2-enamide, and **40** by General Protocols D, E, F, and H. 13% yield over 4 steps. Compound is a red/orange solid at rt.

**<sup>1</sup>H-NMR** (2:1 CDCl<sub>3</sub>:CD<sub>3</sub>OD, 500 MHz): δ 6.76 (d, 1H, *J* = 1.0 Hz, vinyl CH), 6.67 (d, 1H, *J* = 1.0 Hz, vinyl CH), 4.51 (q, 2H, *J* = 8.0 Hz), 2.36 (m, 6H, allylic CH<sub>3</sub>), 1.45 (t, 3H, *J* = 7.0 Hz).

**$^{13}\text{C}$ -NMR** ( $\text{CDCl}_3$ , 125 MHz):  $\delta$  182.06, 175.64, 162.52, 162.29, 152.29, 150.66, 140.21, 139.27, 127.93, 127.71, 119.94, 115.35, 42.97, 23.42, 22.39, 14.36.

**HRMS** (ESI-TOF) calcd for  $\text{C}_{16}\text{H}_{15}\text{N}_2\text{O}_4$  ( $\text{M}+\text{H}$ ) $^+$ : 299.1032, found: 299.1034.

**Melting Point**:  $>280\text{ }^\circ\text{C}$ .

**IR** ( $\text{cm}^{-1}$ , thin film in  $\text{CHCl}_3$ ): 1680 (w), 1647 (b, s), 1601 (w), 1580 (w), 1374 (m), 1292 (m), 1161 (m).

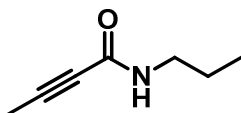

**41**

Synthesized from ethyl-2-butynoate and propylamine by General Protocol A. 71% yield. Compound is a clear, colorless oil.

**$^1\text{H}$ -NMR** ( $\text{CDCl}_3$ , 500 MHz):  $\delta$  5.99 (bs, 1H), 3.35 (q, 2H,  $J = 7.0\text{ Hz}$ , minor rotamer  $\text{NCH}_2$ ), 3.24 (q, 2H,  $J = 7.5\text{ Hz}$ , major rotamer  $\text{NCH}_2$ ), 2.02 (s, 3H, minor rotamer allylic  $\text{CH}_3$ ), 1.93 (s, 3H, major rotamer allylic  $\text{CH}_3$ ), 1.53 (sext, 2H,  $J = 7.5\text{ Hz}$ ), 0.93 (t, 3H,  $J = 7.5\text{ Hz}$ ).

**$^{13}\text{C}$ -NMR** ( $\text{CDCl}_3$ , 125 MHz):  $\delta$  156.60 (minor), 153.62 (major), 89.57 (minor), 82.71 (major), 74.90 (major), 72.54 (minor), 44.97 (minor), 41.34 (major), 23.68 (minor), 22.43 (major), 11.21 (major), 10.98 (minor), 3.83 (minor), 3.50 (major).

**HRMS** (ESI-TOF) calcd for  $\text{C}_7\text{H}_{12}\text{NO}$  ( $\text{M}+\text{H}$ ) $^+$ : 126.0919, found: 126.0914

**Melting Point** Not determined (oil).

**IR** ( $\text{cm}^{-1}$ , thin film in  $\text{CHCl}_3$ ): 3441 (m), 3300 (b, m), 3066 (b, w), 2967 (m), 2249 (s), 2224 (m), 1649 (s), 1517 (s), 1440 (w), 1272 (m), 1162 (w).



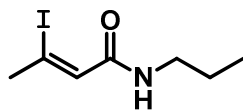

**42**

Synthesized from **41** by General Protocol C. 98% yield. Compound is a clear, colorless oil.

**<sup>1</sup>H-NMR** (CDCl<sub>3</sub>, 500 MHz): δ 6.23 (d, 1H, *J* = 1.5 Hz, vinyl *CH*), 6.22 (bs, 1H, *NH*), 3.23 (d, 2H, *J* = 7.0 Hz, *NCH*<sub>2</sub>), 2.60 (d, 3H, *J* = 1.5 Hz, allylic *CH*<sub>3</sub>), 1.53 (sext, 2H, *J* = 7.0 Hz), 0.90 (t, 3H, 7.5 Hz).

**<sup>13</sup>C-NMR** (CDCl<sub>3</sub>, 125 MHz): δ 164.98, 129.47, 105.47, 41.34, 35.76, 22.77, 11.61.

**HRMS** (ESI-TOF) calcd for C<sub>7</sub>H<sub>13</sub>NOI (M+H)<sup>+</sup>: 254.0042, found: 254.0044.

**Melting Point** Not determined (oil).

**IR** (cm<sup>-1</sup>, thin film in CHCl<sub>3</sub>): 3437 (m), 3324 (b, m), 3073 (b, w), 2967 (m), 1654 (s), 1628 (m), 1513 (m), 1455 (w), 1428 (w), 1377 (w), 1338 (w), 1283 (w), 1154 (w), 1080 (w).

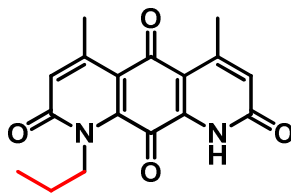

**8**

Synthesized from **70**, (Z)-3-iodo-N-(4-methoxybenzyl)but-2-enamide, and **42** by General Protocols D, E, F, and H. 13% yield over 4 steps. Compound is a red/orange solid.

**<sup>1</sup>H-NMR** (CDCl<sub>3</sub>, 500 MHz): δ 6.77 (d, 1H, *J* = 1.0 Hz, vinyl *CH*), 6.68 (d, 1H, *J* = 1.5 Hz, vinyl *CH*), 4.60 (m, 2H), 2.62 (d, 3H, *J* = 1.5 Hz, allylic *CH*<sub>3</sub>), 2.60 (d, 3H, *J* = 1.0 Hz, allylic *CH*<sub>3</sub>), 1.73 (sext, 2H, *J* = 8.0 Hz, *CH*), 1.04 (t, 3H, *J* = 7.5 Hz).

**<sup>13</sup>C-NMR** (CDCl<sub>3</sub>, 125 MHz): δ 182.08, 175.69, 162.52, 162.38, 152.31, 150.63, 140.01, 139.25, 127.94, 127.73, 120.05, 115.39, 48.50, 23.45, 22.77, 22.38, 11.29.

**HRMS** (ESI-TOF) calcd for C<sub>17</sub>H<sub>17</sub>N<sub>2</sub>O<sub>4</sub> (M+H)<sup>+</sup>: 313.1188, found: 313.1192.

**Melting Point:** >260 °C.

**IR** ( $\text{cm}^{-1}$ , thin film in  $\text{CDCl}_3$ :MeOH, 2:1): 1651 (b, s), 1557 (w), 1535 (w), 1401 (w), 1289 (w), 1153 (w), 1094 (w).

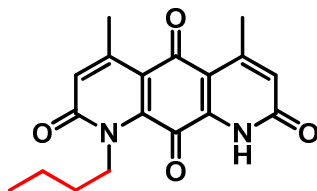

**9**

Synthesized from **70**, (Z)-3-iodo-N-(4-methoxybenzyl)but-2-enamide, and **34** by General Protocols D, E, F, and H. 9.9% yield over 4 steps. Compound is a red solid.

**$^1\text{H}$ -NMR** ( $\text{CDCl}_3$ , 500 MHz):  $\delta$  9.54 (bs, 1H), 6.77 (q, 1H,  $J$  = 1.0 Hz, vinyl CH), 6.68 (q, 1H,  $J$  = 1.0 Hz, vinyl CH), 4.53-4.50 (m, 2H), 2.62 (d, 3H,  $J$  = 1.0 Hz, allylic  $\text{CH}_3$ ), 2.60 (d, 3H,  $J$  = 1.0 Hz, allylic  $\text{CH}_3$ ), 1.68 (pent, 2H,  $J$  = 7.5 Hz), 1.47 (sext, 2H,  $J$  = 7.5 Hz), 1.00 (t, 3H,  $J$  = 7.5 Hz).

**$^{13}\text{C}$ -NMR** ( $\text{CDCl}_3$ , 125 MHz):  $\delta$   $^{13}\text{C}$  NMR (126 MHz,  $\text{CD}_3\text{OD}$ )  $\delta$  181.79, 175.38, 162.20, 162.06, 152.03, 150.29, 139.65, 138.89, 127.71, 127.50, 119.82, 115.11, 48.76, 31.16, 29.76, 23.20, 22.14, 20.27, 13.61.

**HRMS** (ESI-TOF) calcd for  $\text{C}_{18}\text{H}_{19}\text{N}_2\text{O}_4$  ( $\text{M}+\text{H}$ ) $^+$ : 327.1345, found: 327.1358.

**Melting Point:** >270  $^\circ\text{C}$ .

**IR** ( $\text{cm}^{-1}$ , thin film in  $\text{CDCl}_3$ ): 1670 (m), 1651 (b, s), 1609 (w), 1587 (w), 1466 (w), 1401 (w), 1375 (w), 1289 (w), 1157 (w), 1100 (w), 1046 (w).

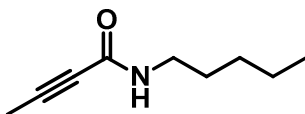

**43**

Synthesized from ethyl-2-butynoate and pentylamine by General Protocol A. 86% yield. Compound is a clear, colorless oil.

**<sup>1</sup>H-NMR** (CDCl<sub>3</sub>, 500 MHz): δ 5.91 (bs, 1H), 3.35 (q, 2H, minor rotamer, *J* = 6.8 Hz, NCH<sub>2</sub>), 3.24 (q, 2H, major rotamer, *J* = 6.8 Hz, NCH<sub>2</sub>), 1.99 (s, 3H, minor rotamer, allylic CH<sub>3</sub>), 1.90 (s, 3H, major rotamer, allylic CH<sub>3</sub>), 1.48 (quint, 2H, *J* = 7.2 Hz), 1.28 (m, 4H), 0.86 (t, 3H, *J* = 6.8 Hz)

**<sup>13</sup>C-NMR** (CDCl<sub>3</sub>, 125 MHz): δ 156.37 (minor), 153.54 (major), 89.39 (minor), 82.51 (major), 74.86 (major), 72.49 (minor), 43.15 (minor), 39.57 (major), 30.01 (minor), 28.82 (major), 28.74 (major), 28.45 (minor), 22.13 (major), 22.05 (minor), 13.75 (major), 3.71 (minor), 3.39 (major) .

**HRMS** (ESI) calcd for C<sub>9</sub>H<sub>16</sub>NO (M+H)<sup>+</sup>: 154.1232, found: 154.1231.

**Melting Point:** Not determined (oil).

**IR** (cm<sup>-1</sup>, thin film in CDCl<sub>3</sub>): 3498 (m), 3270 (b, s), 3063 (m), 2933 (s), 2861 (m), 2256 (m), 2216 (m), 1651 (s), 1539 (s), 1455 (m), 1373 (m), 1288 (m), 1211 (w), 1149 (w).

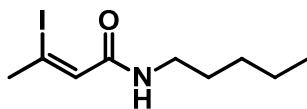

**44**

Synthesized from **43** by General Protocol C. 81% yield. Compound is a pale yellow/brown oil.

**<sup>1</sup>H-NMR** (CDCl<sub>3</sub>, 500 MHz): δ 6.22 (d, 1H, *J* = 1.5 Hz, vinyl CH), 5.77 (bs, 1H, NH), 3.32 (q, 2H, *J* = 7.0 Hz, NCH<sub>2</sub>), 2.64 (d, 3H, *J* = 1.5 Hz, allylic CH<sub>3</sub>), 1.55 (pent, 2H, *J* = 7.0 Hz), 1.35-1.30 (m, 4H), 0.89 (t, 3H, *J* = 7.0 Hz)

**<sup>13</sup>C-NMR** (CDCl<sub>3</sub>, 125 MHz): δ 164.60, 128.78, 105.36, 39.36, 35.62, 29.00, 28.92, 22.19, 13.87.

**HRMS** (ESI-TOF) calcd for C<sub>9</sub>H<sub>17</sub>NOI (M+H)<sup>+</sup>: 282.0355, found: 282.0356.

**Melting Point:** Not determined (oil).

**IR** (cm<sup>-1</sup>, thin film in CDCl<sub>3</sub>): 3498 (m), 3288 (b, s), 3072 (m), 2928 (s), 2859 (s), 1651 (s), 1618 (s), 1557 (s), 1434 (m), 1374 (m), 1337 (m), 1228 (m), 1149 (w), 1087 (m).

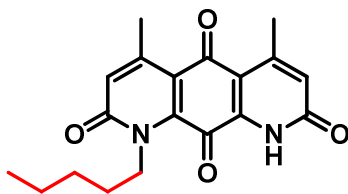

**10**

Synthesized from **70**, (Z)-3-iodo-N-(4-methoxybenzyl)but-2-enamide, and **44** by General Protocols D, E, F, and H. 11% yield over 4 steps. Compound is a red amorphous solid.

**<sup>1</sup>H-NMR** (2:1 CDCl<sub>3</sub>:CD<sub>3</sub>OD, 500 MHz): δ 6.76 (d, 1H, *J* = 1.0 Hz, vinyl *CH*), 6.67 (d, 1H, *J* = 1.5 Hz, vinyl *CH*), 4.48-4.43 (m, 2H), 2.63 (d, 3H, *J* = 1.5 Hz, allylic *CH*<sub>3</sub>), 2.63 (d, 3H, *J* = 1.0 Hz, allylic *CH*<sub>3</sub>), 1.77 (pent, 2H, *J* = 7.5 Hz), 1.48-1.40 (m, 4H), 0.95 (t, 3H, *J* = 7.0 Hz).

**<sup>13</sup>C-NMR** (2:1 CDCl<sub>3</sub>:CD<sub>3</sub>OD, 125 MHz): δ 181.47, 175.05, 161.83, 161.68, 151.66, 149.89, 139.31, 138.53, 127.40, 127.19, 119.45, 114.75, 28.82, 28.48, 22.87, 22.07, 21.81, 13.58.

**HRMS** (ESI-TOF) calcd for C<sub>19</sub>H<sub>21</sub>N<sub>2</sub>O<sub>4</sub> (M+H)<sup>+</sup>: 341.1501, found: 341.1496.

**Melting Point:** >250 °C.

**IR** (cm<sup>-1</sup>, thin film in CDCl<sub>3</sub>): 1683 (m), 1651 (b, s), 1613 (m), 1591 (w), 1471 (w), 1399, (w), 1368 (w), 1290 (w), 1160 (w), 1053 (w).

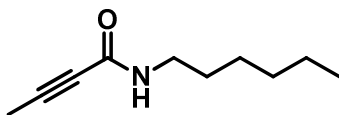

**45**

Synthesized from ethyl-2-butynoate and hexylamine by General Protocol A. 79% yield. Compound is a white crystalline solid.

**<sup>1</sup>H-NMR** (CDCl<sub>3</sub>, 500 MHz): δ 5.95 (bs, 1H, major rotamer *NH*), 3.34 (q, 2H, *J* = 7.0 Hz, minor rotamer), 3.23 (q, 2H, *J* = 7.0 Hz, major rotamer), 1.98 (s, 3H, minor rotamer), 1.89 (s, 3H, major rotamer), 1.47 (pent, 2H, *J* = 7.0 Hz), 1.33-1.23 (m, 6H), 0.84 (t, 3H, *J* = 7.0 Hz).

**$^{13}\text{C}$ -NMR** ( $\text{CDCl}_3$ , 125 MHz)  $\delta$  153.58 (major), 82.92 (major), 75.05 (major), 43.37 (minor), 39.85 (major), 31.49 (major), 30.56 (minor), 29.33 (major), 26.57 (major), 26.22 (minor), 22.59 (major), 14.06 (major), 3.69 (major).

**HRMS** (ESI) calcd for  $\text{C}_{10}\text{H}_{18}\text{NO}$  ( $\text{M}+\text{H}$ ) $^+$ : 168.1388, found: 168.1391.

**Melting Point:** 39.0-39.8  $^{\circ}\text{C}$ .

**IR** ( $\text{cm}^{-1}$ , thin film in  $\text{CHCl}_3$ ): 3540 (b, s), 2957 (m), 2858 (w), 2252 (w), 2222 (w), 1635 (s), 1541 (m), 1458 (w), 1291 (w).

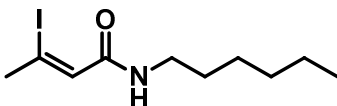

**46**

Synthesized from **45** by General Protocol C. 98% yield. Compound is a light yellow/brown oil.

**$^1\text{H}$ -NMR** ( $\text{CDCl}_3$ , 500 MHz):  $\delta$  6.22 (q, 1H,  $J$  = 1.5 Hz, vinyl  $\text{CH}$ ), 5.73 (bs, 1H,  $\text{NH}$ ), 3.32 (q, 2H,  $J$  = 7.0 Hz), 2.64 (d, 3H,  $J$  = 1.5 Hz, allylic  $\text{CH}_3$ ), 1.55 (pent, 2H,  $J$  = 7.0 Hz), 1.38-1.27 (m, 6H), 0.88 (t, 3H,  $J$  = 7.0 Hz).

**$^{13}\text{C}$ -NMR** ( $\text{CDCl}_3$ , 125 MHz)  $\delta$  164.51, 128.65, 105.27, 39.35, 35.58, 31.27, 29.14, 26.49, 22.33, 13.83.

**HRMS** (ESI-TOF) calcd for  $\text{C}_{10}\text{H}_{19}\text{NOI}$  ( $\text{M}+\text{H}$ ) $^+$ : 296.0511, found: 296.0510.

**Melting Point** Not determined (oil).

**IR** ( $\text{cm}^{-1}$ , thin film in  $\text{CDCl}_3$ ): 3291 (b, s), 3070 (m), 2954 (s), 2857 (s), 1654 (s), 1625 (m), 1542 (m), 1458 (m), 1437 (m), 1375 (w), 1339 (w), 1226 (m), 1078 (w).

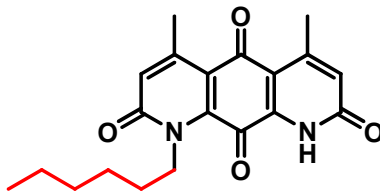

**11**

Synthesized from **70**, (Z)-3-iodo-N-(4-methoxybenzyl)but-2-enamide, and **46** by General Protocols D, E, F, and H. 12% yield over 4 steps. Compound is a pink/red solid.

**<sup>1</sup>H-NMR** (2:1 CDCl<sub>3</sub>:CD<sub>3</sub>OD, 500 MHz): δ 6.76 (s, 1H), 6.67 (s, 1H), 4.45 (m, 2H), 2.63 (d, 3H, *J* = 1.0 Hz, allylic CH<sub>3</sub>), 2.63 (d, 3H, *J* = 1.0 Hz, allylic CH<sub>3</sub>), 1.76 (pent, 2H, *J* = 7.5 Hz), 1.46 (pent, 2H, *J* = 7.0 Hz), 1.40-1.34 (m, 4H), 0.92 (t, 3H, *J* = 7.0 Hz).

**<sup>13</sup>C-NMR** (2:1 CDCl<sub>3</sub>:CD<sub>3</sub>OD, 125 MHz): δ 181.46, 175.04, 161.82, 161.66, 151.65, 149.88, 139.30, 138.53, 127.40, 127.20, 119.44, 114.74, 46.57, 31.18, 28.76, 26.36, 22.87, 22.35, 21.81, 13.58.

**HRMS** (ESI-TOF) calcd for C<sub>20</sub>H<sub>23</sub>N<sub>2</sub>O<sub>5</sub> (M+H)<sup>+</sup>: 355.1658, found: 355.1660.

**Melting Point:** >250 °C.

**IR** (cm<sup>-1</sup>, thin film in CDCl<sub>3</sub>): 1677 (m), 1651 (b, s), 1613 (m), 1586 (m), 1469 (w), 1434 (w), 1402 (m), 1386 (m), 1328 (w), 1291 (m), 1150 (w), 1102 (m), 1060 (w).

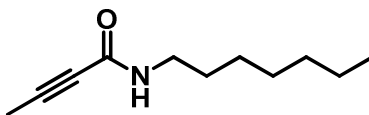

**47**

Synthesized from ethyl-2-butynoate and heptylamine by General Protocol A. 72% yield. Compound is white crystalline solid.

**<sup>1</sup>H-NMR** (CDCl<sub>3</sub>, 500 MHz): δ 5.95 (bs, 1H, NH), 3.34 (q, 2H, *J* = 7.0 Hz, minor rotamer NCH<sub>2</sub>), 3.22 (dt, 2H, *J* = 7.0 Hz, major rotamer), 1.98 (s, 3H, minor rotamer), 1.89 (s, 3H, major rotamer), 1.47 (pent, 2H, *J* = 7.5 Hz), 1.30-1.20 (m, 8H), 0.84 (t, 3H, *J* = 7.0 Hz).

**$^{13}\text{C}$ -NMR** ( $\text{CDCl}_3$ , 125 MHz):  $\delta$  156.51 (minor), 153.65 (major), 89.75 (minor), 82.97 (major), 75.14 (major), 72.80 (minor), 43.44 (minor), 39.93, (major), 31.84 (major), 30.67 (minor), 29.44 (major), 29.04 (major), 28.97 (minor), 26.94 (major), 26.59 (minor), 22.69 (major).

**HRMS** (ESI-TOF) calcd for  $\text{C}_{11}\text{H}_{20}\text{NO}$  ( $\text{M}+\text{H}$ ) $^+$ : 182.1545, found: 182.1550.

**Melting Point:** 50.1-52.2  $^{\circ}\text{C}$ .

**IR** ( $\text{cm}^{-1}$ , thin film in  $\text{CHCl}_3$ ): 3449 (b, s), 2960 (m), 2250 (w), 2202 (w), 1636 (s), 1278 (m).

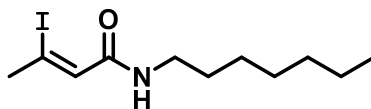

**48**

Synthesized from **47** by General Protocol C. 86% yield. Compound is a pale yellow oil.

**$^1\text{H}$ -NMR** ( $\text{CDCl}_3$ , 500 MHz):  $\delta$  6.24 (q, 1H,  $J$  = 1.5 Hz, vinyl  $\text{CH}$ ), 5.73 (bs, 1H,  $\text{NH}$ ), 3.33 (q, 2H,  $J$  = 6.5 Hz), 2.65 (d, 3H,  $J$  = 1.5 Hz, allylic  $\text{CH}_3$ ), 1.55 (pent, 2H,  $J$  = 7.0 Hz), 1.38-1.23 (m, 8H), 0.88 (t, 3H,  $J$  = 7.0 Hz).

**$^{13}\text{C}$ -NMR** ( $\text{CDCl}_3$ , 125 MHz):  $\delta$  164.72, 129.06, 105.40, 39.52, 35.68, 31.68, 29.37, 28.92, 26.95, 22.52, 14.02.

**HRMS** (ESI-TOF) calcd for  $\text{C}_{11}\text{H}_{21}\text{NOI}$  ( $\text{M}+\text{H}$ ) $^+$ : 310.0668, found: 310.0654.

**Melting Point** Not determined (oil).

**IR** ( $\text{cm}^{-1}$ , thin film in  $\text{CHCl}_3$ ): 3289 (b, s), 3069 (m), 2926 (s), 2855 (s), 1651 (b, s), 1539 (s), 1435 (m), 1229 (m), 1077 (w).

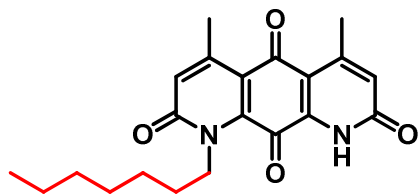

**12**

Synthesized from **70**, (Z)-3-iodo-N-(4-methoxybenzyl)but-2-enamide, and **48** by General Protocols D, E, F, and H. 10% yield over 4 steps. Compound is an orange solid.

**<sup>1</sup>H-NMR** (2:1 CDCl<sub>3</sub>:CD<sub>3</sub>OD, 500 MHz): δ 6.76 (q, 1H, *J* = 1.5 Hz, vinyl *CH*), 6.66 (q, 1H, *J* = 1.0 Hz, vinyl *CH*), 4.47-4.44 (m, 2H), 2.63 (d, 3H, *J* = 1.0 Hz, allylic *CH*<sub>3</sub>), 2.63 (d, 3H, *J* = 1.0 Hz, allylic *CH*<sub>3</sub>), 1.77 (bpent, 2H, *J* = 8.0 Hz), 1.46 (bpent, 2H, *J* = 8.0 Hz), 1.42-1.26 (m, 6H), 0.90 (t, 3H, *J* = 7.0 Hz).

**<sup>13</sup>C-NMR** (CDCl<sub>3</sub>, 125 MHz): δ 182.01, 175.59, 162.40, 162.24, 152.24, 150.46, 139.86, 139.09, 127.95, 127.73, 120.01, 115.32, 47.14, 32.13, 29.39, 29.26, 27.23, 23.43, 22.89, 22.37, 14.20.

**HRMS** (ESI-TOF) calcd for C<sub>21</sub>H<sub>25</sub>N<sub>2</sub>O<sub>4</sub> (M+H)<sup>+</sup>: 369.1814, found: 369.1811.

**Melting Point:** >220 °C.

**IR** (cm<sup>-1</sup>, thin film in CHCl<sub>3</sub>): 1651 (b, s), 1611 (m), 1587 (w), 1397 (w), 1323 (w), 1292 (w), 1177 (w), 1102 (w).

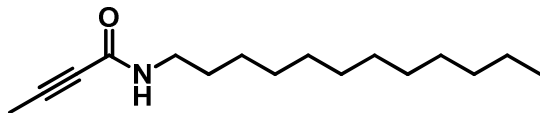

**49**

Synthesized from ethyl-2-butynoate and dodecylamine by General Protocol A. 72% yield. Compound is a white amorphous solid.

**<sup>1</sup>H-NMR** (CDCl<sub>3</sub>, 500 MHz): δ 5.72 (bs, 1H, major rotamer *NH*), 5.64 (bs, 1H, minor rotamer *NH*), 3.37 (q, 2H, *J* = 7.0 Hz, minor rotamer *NCH*<sub>2</sub>), 3.26 (q, 2H, *J* = 7.0 Hz, major rotamer *NCH*<sub>2</sub>), 2.01 (d, 3H, *J* = 1.0 Hz, minor rotamer allylic *CH*<sub>3</sub>), 1.93 (d, 3H, *J* = 1.0 Hz, major rotamer allylic *CH*<sub>3</sub>), 1.50 (pent, 2H, *J* = 7.0 Hz), 1.34-1.20 (m, 18H), 0.87 (t, 3H, *J* = 7.0 Hz).



**$^{13}\text{C}$ -NMR** ( $\text{CDCl}_3$ , 125 MHz):  $\delta$  153.61 (major), 82.73 (major), 75.05 (major), 43.36 (minor), 39.81 (major), 31.92 (major), 30.55 (minor), 29.66 (major), 29.64 (major), 29.61 (major), 29.56 (major), 29.37 (major), 29.31 (2C, major), 26.90 (major), 26.53 (minor), 22.69 (major), 14.12 (major), 3.95 (minor), 3.62 (major).

**HRMS** (ESI-TOF) calcd for  $\text{C}_{16}\text{H}_{30}\text{NO}$  ( $\text{M}+\text{H}$ ) $^+$ : 252.2327, found: 252.2327.

**Melting Point:** 63.4-64.6  $^{\circ}\text{C}$ .

**IR** ( $\text{cm}^{-1}$ , thin film in  $\text{CDCl}_3$ ): 3300 (b, w), 3273 (m), 3059 (w), 2956 (w), 2918 (m), 2848 (m), 2258 (w), 2216 (w), 1645 (w), 1615 (s), 1541 (m), 1474 (m), 1296 (w).

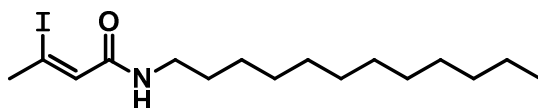

**50**

Synthesized from **49** by General Protocol C. 98% yield. Compound is an off-white solid.

**$^1\text{H}$ -NMR** ( $\text{CDCl}_3$ , 500 MHz):  $\delta$  6.22 (q, 1H,  $J$  = 1.5 Hz, vinyl  $\text{CH}$ ), 5.93 (bs, 1H,  $\text{NH}$ ), 3.29 (q, 2H,  $J$  = 6.0 Hz), 2.62 (d, 3H,  $J$  = 1.5 Hz,  $\text{NCH}_3$ ), 1.52 (pent, 2H,  $J$  = 7.5 Hz), 1.35-1.20 (m, 18H), 0.85 (t, 3H,  $J$  = 7.0 Hz).

**$^{13}\text{C}$ -NMR** ( $\text{CDCl}_3$ , 125 MHz):  $\delta$  164.97, 129.73, 105.42, 39.74, 35.80, 32.07, 29.80, 29.79, 29.74, 29.71, 29.59, 29.50, 29.46, 27.20, 22.84, 14.27.

**HRMS** (ESI-TOF) calcd for  $\text{C}_{16}\text{H}_{31}\text{NOI}$  ( $\text{M}+\text{H}$ ) $^+$ : 380.1450, found: 380.1452.

**Melting Point:** 51.9-53.6  $^{\circ}\text{C}$ .

**IR** ( $\text{cm}^{-1}$ , thin film in  $\text{CDCl}_3$ ): 3512 (b, s), 3308 (s), 3094 (m), 2916 (s), 2850 (s), 1651 (s), 1632 (s), 1557 (s), 1470 (m), 1431 (w), 1372 (w), 1337 (w), 1237 (m), 1157 (w), 1076 (w).

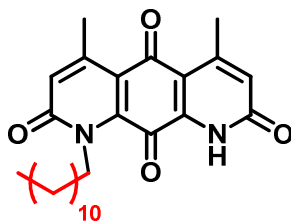

### 13

Synthesized from **70**, (Z)-3-iodo-N-(4-methoxybenzyl)but-2-enamide, and **50** by General Protocols D, E, F, and H. 15% yield over 4 steps. Compound is an orange solid.

**<sup>1</sup>H-NMR** (CDCl<sub>3</sub>, 500 MHz): δ 10.3 (bs, 1H, NH), 6.75 (d, 1H, *J* = 1.0 Hz, vinyl CH), 6.68 (s, 1H, vinyl CH), 4.48 (t, 2H, *J* = 8.0 Hz, NCH<sub>2</sub>), 2.61 (d, 3H, *J* = 0.5 Hz, allylic CH<sub>3</sub>), 2.59 (d, 3H, *J* = 1.0 Hz, allylic CH<sub>3</sub>), 1.69 (pent, 2H, *J* = 7.5 Hz, NCH<sub>2</sub>CH<sub>2</sub>-), 1.42 (pent, 2H, *J* = 7.5 Hz, NCH<sub>2</sub>CH<sub>2</sub>CH<sub>2</sub>-), 1.38-1.18 (m, 16H), 0.86 (t, 3H, *J* = 7.0 Hz, -CH<sub>2</sub>CH<sub>3</sub>).

**<sup>13</sup>C-NMR** (CDCl<sub>3</sub>, 125 MHz): δ 181.78, 175.27, 161.27, 130.99, 151.38, 149.30, 139.13, 137.98, 128.64, 128.40, 119.69, 114.66, 46.50, 32.12, 29.87, 29.85, 29.81, 29.80, 29.55, 29.44, 29.39, 27.14, 23.55, 22.88, 22.44, 14.32.

**HRMS** (ESI-TOF) calcd for C<sub>26</sub>H<sub>35</sub>N<sub>2</sub>O<sub>4</sub> (M+H)<sup>+</sup>: 439.2597, found: 439.2595.

**Melting Point:** >180 °C.

**IR** (cm<sup>-1</sup>, thin film in CHCl<sub>3</sub>): 2919 (m), 2850 (m), 1680 (m), 1651 (b, s), 1613 (m), 1557 (w), 1470 (w), 1401 (m), 1302 (m), 1157 (w), 1052 (w).

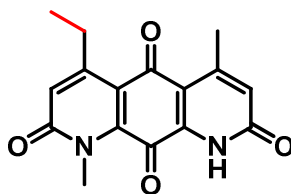

### 14

Synthesized from **70**, (Z)-3-iodo-N-(4-methoxybenzyl)but-2-enamide, and **36** by General Protocols D, E, F, and H. 7.4% yield over 4 steps. Compound is a red solid.

**<sup>1</sup>H-NMR** (2:1 CDCl<sub>3</sub>:CD<sub>3</sub>OD, 500 MHz): δ 6.81 (d, 1H, *J* = 1.0 Hz, vinyl CH), 6.67 (d, 1H, *J* = 1.0 Hz, vinyl CH), 3.92 (s, 3H), 3.09 (dq, 2H, *J* = 7.0, 0.5 Hz, allylic CH<sub>2</sub>), 2.64 (d, 3H, *J* = 1.5 Hz, allylic CH<sub>3</sub>), 1.26 (t, 3H, *J* = 7.5 Hz, CH<sub>3</sub>).

**<sup>13</sup>C-NMR** (CDCl<sub>3</sub>, 125 MHz): δ 181.33, 175.31, 162.29, 161.90, 155.57, 151.68, 140.24, 138.50, 127.15, 125.27, 118.83, 115.06, 33.98, 27.88, 21.83, 13.55.

**HRMS** (ESI-TOF) calcd for C<sub>16</sub>H<sub>15</sub>N<sub>2</sub>O<sub>4</sub> (M+H)<sup>+</sup>: 299.1032, found: 299.1034.

**Melting Point:** >290 °C.

**IR** (cm<sup>-1</sup>, thin film in CHCl<sub>3</sub>): 3024 (w), 2905 (w), 1684 (m), 1653 (b, s), 1607 (m), 1583 (w), 1458 (w), 1399 (m), 1363 (m), 1291 (m), 1264 (w), 1165 (w), 1035 (w).

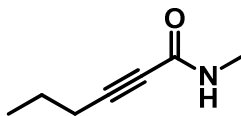

**51**

Synthesized from ethyl-2-hexynoate and methylamine by General Protocol A. 92% yield. Compound is a pale yellow oil.

**<sup>1</sup>H-NMR** (CDCl<sub>3</sub>, 500 MHz): δ 6.04 (bs, 1H, major rotamer NH), 5.89 (bs, 1H, minor rotamer), 2.99 (d, 3H, *J* = 5.0 Hz, minor rotamer), 2.81 (d, 3H, *J* = 5.0 Hz, major rotamer), 2.33 (t, 2H, *J* = 7.0 Hz, minor rotamer), 2.22 (t, 2H, *J* = 7.0 Hz, major rotamer), 1.59 (sext, 2H, *J* = 7.0 Hz, minor rotamer), 1.54 (sext, 2H, *J* = 7.0 Hz, major rotamer), 0.99 (t, 3H, *J* = 7.5 Hz, minor rotamer), 0.96 (t, 3H, *J* = 7.5 Hz, major rotamer).

**<sup>13</sup>C-NMR** (CDCl<sub>3</sub>, 125 MHz): δ 54.47 (major), 87.18 (major), 75.76 (major), 29.87 (minor), 26.58 (major), 21.43 (major), 20.97 (minor), 20.65 (major), 13.60 (major).

**HRMS** (ESI) calcd for C<sub>7</sub>H<sub>12</sub>NO (M+H)<sup>+</sup>: 126.0919, found: 126.0920.

**Melting Point** Not determined (oil).

**IR** (cm<sup>-1</sup>, thin film in CHCl<sub>3</sub>): 3455 (m), 3307 (b, m), 3070 (b, w), 2967 (m), 2251 (m), 2217 (m), 1649 (s), 1520 (m), 1411 (w), 1267 (m), 1163 (w).

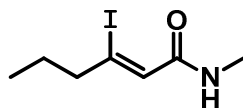

**52**

Synthesized from **51** by General Protocol C. 96% yield. Compound is a yellow/brown oil.

**<sup>1</sup>H-NMR** (CDCl<sub>3</sub>, 500 MHz): δ 6.40 (bs, 1H, NH), 6.30 (s, 1H, vinyl CH), 2.82 (d, 3H, *J* = 5.0 Hz, NCH<sub>3</sub>), 2.53 (t, 2H, *J* = 7.0 Hz, allylic CH<sub>2</sub>), 1.54 (sext, 2H, *J* = 7.5 Hz), 0.86 (t, 3H, *J* = 7.5 Hz).

**<sup>13</sup>C-NMR** (CDCl<sub>3</sub>, 125 MHz): δ 165.86, 128.49, 114.01, 49.03, 26.30, 22.52, 12.82.

**HRMS** (ESI-TOF) calcd for C<sub>7</sub>H<sub>13</sub>NOI (M+H)<sup>+</sup>: 254.0042, found: 254.0045.

**Melting Point** Not determined (oil).

**IR** (cm<sup>-1</sup>, thin film in CHCl<sub>3</sub>): 3455 (m), 3328 (b, m), 3080 (b, w), 2965 (m), 1658 (s), 1624 (m), 1524 (m), 1414 (m), 1333 (w), 1285 (w), 1237 (w), 1165 (w), 1087 (w).

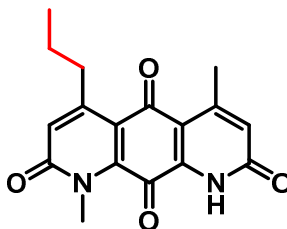

**15**

Synthesized from **70**, (Z)-3-iodo-N-(4-methoxybenzyl)but-2-enamide, and **52** by General Protocols D, E, F, and H. 3.4% yield over 4 steps. Compound is a red/orange solid.

**<sup>1</sup>H-NMR** (CDCl<sub>3</sub>, 500 MHz): δ 6.80 (s, 1H, vinyl CH), 6.68 (d, 1H, *J* = 1.0 Hz, vinyl CH), 3.93 (s, 3H), 2.98 (t, 2H, *J* = 7.5 Hz, allylic CH<sub>2</sub>), 2.62 (d, 3H, *J* = 1.0 Hz, allylic CH<sub>3</sub>), 1.61 (q, 2H, *J* = 7.5 Hz), 1.03 (t, 3H, *J* = 7.5 Hz, CH(CH<sub>3</sub>)<sub>2</sub>).

**HRMS** (ESI-TOF) calcd for C<sub>17</sub>H<sub>17</sub>N<sub>2</sub>O<sub>4</sub> (M+H)<sup>+</sup>: 313.1188, found: 313.1189.

**Melting Point:** >220°C.

**IR** ( $\text{cm}^{-1}$ , thin film in  $\text{CDCl}_3$ ): 2954 (w), 2912 (w), 2850 (w), 1651 (b, s), 1542 (s), 1632 (m), 1557 (w), 1538 (w), 1505 (w), 1455 (w), 1399 (w), 1288 (m), 1163 (w).

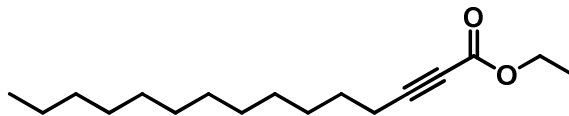

**53**

To an oven-dried Schlenk flask was added 1-tetradecyne (0.748 g, 3.85 mmol) and THF (10 mL). Chilled to  $-78\text{ }^{\circ}\text{C}$ . Added n-BuLi (2.7 mL, 4.32 mmol) dropwise then stirred for 10 minutes. Added ethyl chloroformate (0.56 mL, 5.86 mmol) then allowed the reaction to warm to RT. The solvent was evaporated and the residue was purified by silica gel chromatography. Product was collected as a colorless oil (1.01 g, 3.79 mmol, 98.5% yield). Compound is a clear, colorless oil.

**$^1\text{H}$ -NMR** ( $\text{CDCl}_3$ , 500 MHz):  $\delta$  4.19 (q, 2H,  $J = 7.5$  Hz), 2.30 (t, 2H,  $J = 7.5$  Hz), 1.56 (pent, 2H,  $J = 7.5$  Hz), 1.37 (bpent, 2H,  $J = 8.0$  Hz), 1.29 (t, 3H,  $J = 7.5$  Hz), 1.28-1.21 (m, 16H), 0.86 (t, 3H,  $J = 7.0$  Hz).

**$^{13}\text{C}$ -NMR** ( $\text{CDCl}_3$ , 125 MHz):  $\delta$  154.06, 89.66, 73.33, 61.91, 32.10, 29.82, 29.81, 29.77, 29.60, 29.53, 29.21, 29.04, 27.73, 22.87, 14.29, 14.21.

**HRMS** (ESI-TOF) calcd for  $\text{C}_{17}\text{H}_{31}\text{O}_2$  ( $\text{M}+\text{H}$ ) $^+$ : 267.2324, found: 267.2327.

**Melting Point** Not determined (oil).

**IR** ( $\text{cm}^{-1}$ , thin film, neat): 2952 (s), 2855 (s), 2320 (w), 2235 (s), 1714 (b, s), 1464 (m), 1366 (m), 1248 (s), 1073 (s).

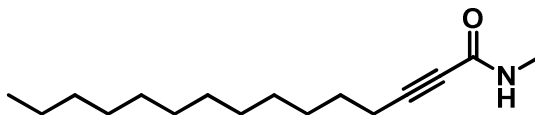

**54**

Synthesized from **53** and methylamine by General Protocol A. 66% yield. Compound is a white amorphous solid.

**<sup>1</sup>H-NMR** (CDCl<sub>3</sub>, 500 MHz): δ 6.42 (bs, 1H, major rotamer NH), 6.24 (bs, 1H, minor rotamer NH), 2.93 (d, 3H, *J* = 5.0 Hz, minor rotamer NCH<sub>3</sub>), 2.75 (d, 3H, *J* = 5.0 Hz, major rotamer NCH<sub>3</sub>), 2.29 (t, 2H, *J* = 7.0 Hz, minor rotamer allylic CH<sub>2</sub>), 2.18 (t, 2H, *J* = 7.0 Hz, *J* = 7.0 Hz, major rotamer allylic CH<sub>2</sub>), 1.50 (pent, 2H, *J* = 7.0 Hz, minor rotamer), 1.45 (pent, 2H, *J* = 7.5 Hz, major rotamer), 1.29 (bpent, 2H, *J* = 7.5 Hz, major rotamer), 1.25-1.13 (m, 16H), 0.79 (t, 3H, *J* = 7.0 Hz).

**<sup>13</sup>C-NMR** (CDCl<sub>3</sub>, 125 MHz): δ 157.35 (minor), 154.47 (major), 94.59 (minor), 87.17 (major), 75.50 (major), 73.14 (minor), 31.92 (major), 29.66 (major), 29.64 (2C, major), 29.48 (major), 29.36 (major), 29.10 (major), 28.90 (major), 27.83 (major), 26.43 (major), 22.69 (major), 18.57 (major), 14.11 (major).

**HRMS** (ESI-TOF) calcd for C<sub>16</sub>H<sub>30</sub>NO (M+H)<sup>+</sup>: 252.2327, found: 252.2327.

**Melting Point:** 49.2-50.2 °C.

**IR** (cm<sup>-1</sup>, thin film in CDCl<sub>3</sub>): 3428 (b, m), 3290 (s), 2958 (m), 2920 (s), 2849 (m), 2250 (w), 2221 (w), 1625 (s), 1557 (m), 1469 (m), 1414 (w), 1292 (w), 1160 (w).

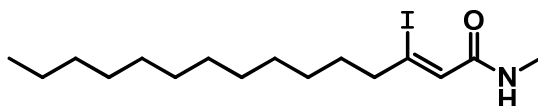

**55**

Synthesized from **54** by General Protocol C. 100% yield. Compound is a yellow solid.

**<sup>1</sup>H-NMR** (CDCl<sub>3</sub>, 500 MHz): δ 6.27 (s, 1H, vinyl CH), 5.74 (bs, 1H, NH), 2.89 (d, 3H, *J* = 4.5 Hz), 2.59 (t, 2H, *J* = 7.5 Hz), 1.56 (bt, 2H, *J* = 7.0), 1.33-1.22 (m, 18H), 0.88 (t, 3H, *J* = 7.0 Hz).

**<sup>13</sup>C-NMR** (CDCl<sub>3</sub>, 125 MHz): δ 165.96, 128.50, 114.45, 47.23, 32.07, 29.81, 29.80, 29.77, 29.66, 29.51, 29.50, 29.36, 28.44, 26.36, 22.84, 14.29.

**HRMS** (ESI-TOF) calcd for C<sub>16</sub>H<sub>31</sub>NOI (M+H)<sup>+</sup>: 380.1450, found: 380.1451.

**Melting Point:** 45.1-48.8 °C.

**IR** (cm<sup>-1</sup>, thin film in CDCl<sub>3</sub>): 3470 (b, w), 3291 (m), 3080 (w), 2924 (s), 2853 (s), 1651 (s), 1618 (m), 1557 (m), 1464 (w), 1410 (w), 1350 (w), 1234 (w), 1161 (w), 1091 (w).

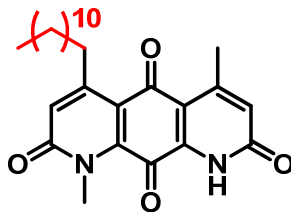

16

Synthesized from **70**, (Z)-3-iodo-N-(4-methoxybenzyl)but-2-enamide, and **55** by General Protocols D, E, F, and H. 7.0% yield over 4 steps. Compound is a peach solid.

**<sup>1</sup>H-NMR** (2:1 CDCl<sub>3</sub>:CD<sub>3</sub>OD, 500 MHz): δ 6.78 (s, vinyl CH), 6.67 (d, 1H, *J* = 1.0 Hz, vinyl CH), 3.91 (s, 3H), 3.03 (t, *J* = 8.0 Hz), 2.64 (d, 3H, *J* = 1.0 Hz, allylic CH<sub>3</sub>), 1.58 (p, 2H, *J* = 7.5 Hz), 1.44 (p, 2H, *J* = 7.5 Hz), 1.27-1.4 (m, 16H), 0.89 (t, 3H, *J* = 7.5 Hz).

**<sup>13</sup>C-NMR** (d-TFA, 125 MHz): δ 182.13, 176.16, 166.58 (bs), 163.92 (bs), 160.66, 141.89, 139.75, 128.19 (bs), 126.92, 125.93, 120.93, 38.25, 37.45, 33.96, 32.05, 31.63 (2C), 31.57, 31.52, 31.41, 31.36, 31.15, 24.53, 23.41, 14.85.

**HRMS** (ESI-TOF) calcd for C<sub>26</sub>H<sub>35</sub>N<sub>2</sub>O<sub>4</sub> (M+H)<sup>+</sup>: 439.2597, found: 439.2600.

**Melting Point:** >220 °C.

**IR** (cm<sup>-1</sup>, thin film in CHCl<sub>3</sub>): 3066 (w), 2916 (m), 2849 (m), 1662 (b, s), 1612 (w), 1583 (w), 1469 (w), 1399 (m), 1297 (m), 1257 (w), 1163 (w), 1095 (w).

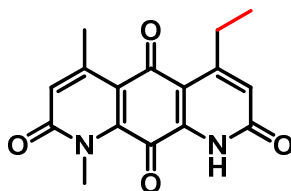

17

Synthesized from **70**, (Z)-3-iodo-N-methylbut-2-enamide,<sup>1</sup> and **38** by General Protocols D, E, F, and H. 6.2% yield over 4 steps. Compound is a red solid at rt.

**<sup>1</sup>H-NMR** (2:1 CDCl<sub>3</sub>:CD<sub>3</sub>OD, 500 MHz): δ 6.78 (d, 1H, *J* = 1.0 Hz, vinyl *CH*), 6.70 (s, 1H, vinyl *CH*), 3.92 (s, 3H), 3.09 (qd, 2H, *J* = 7.5, 1.0 Hz), 2.64 (d, 3H, *J* = 1.0 Hz, allylic *CH*<sub>3</sub>), 1.26 (t, 3H, *J* = 7.5 Hz, CH(*CH*<sub>3</sub>)<sub>2</sub>).

**<sup>13</sup>C-NMR** (2:1 CDCl<sub>3</sub>:CD<sub>3</sub>OD, 125 MHz): δ 181.96, 175.93, 162.89, 162.72, 158.05, 150.81, 140.47, 139.74, 127.48, 125.97, 119.98, 115.12, 34.49, 27.94, 23.36, 13.93.

**HRMS** (ESI-TOF) calcd for C<sub>16</sub>H<sub>15</sub>N<sub>2</sub>O<sub>4</sub> (M+H)<sup>+</sup>: 299.1032, found: 299.1041.

**Melting Point:** >290 °C.

**IR** (cm<sup>-1</sup>, thin film in CHCl<sub>3</sub>): 3036 (w), 2968 (w), 2926 (w), 1680 (m), 1651 (b, s), 1601 (m), 1583 (m), 1397 (w), 1375 (w), 1348 (m), 1287 (w), 1156 (w), 1100 (w).

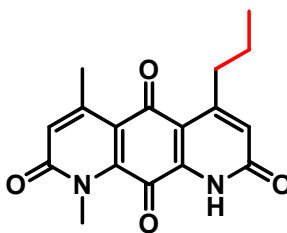

**18**

Synthesized from **70**, (Z)-3-iodo-N-methylbut-2-enamide, and **30** by General Protocols D, E, F, and H. 11% yield over 4 steps. Compound is an orange solid.

**<sup>1</sup>H-NMR** (CDCl<sub>3</sub>, 500 MHz): δ 9.48 (bs, 1H, *NH*), 6.79 (d, 1H, *J* = 1.5 Hz, vinyl *CH*), 6.69 (s, 1H, vinyl *CH*), 3.93 (s, 3H), 3.00 (t, 2H, *J* = 7.5 Hz), 2.61 (d, 3H, *J* = 1.0 Hz, allylic *CH*<sub>3</sub>), 1.62 (sext, 2H, *J* = 7.5 Hz), 1.04 (t, 3H, *J* = 7.5 Hz).

**<sup>13</sup>C-NMR** (CDCl<sub>3</sub>, 125 MHz): δ 181.55, 175.57, 162.35, 156.13, 150.44, 140.04, 139.38, 127.23, 126.62, 119.70, 114.83, 36.32, 34.18, 23.08, 22.95, 13.83.

**HRMS** (ESI-TOF) calcd for C<sub>17</sub>H<sub>17</sub>N<sub>2</sub>O<sub>4</sub> (M+H)<sup>+</sup>: 313.1188, found: 313.1187.

**Melting Point:** >280 °C.

**IR** (cm<sup>-1</sup>, thin film in CDCl<sub>3</sub>): 3031 (w), 2961 (w), 2912 (w), 1680 (m), 1651 (b, s), 1604 (w), 1583 (w), 1455 (w), 1398 (w), 1350 (m), 1289 (m), 1261 (w), 1160 (w), 1105 (w).



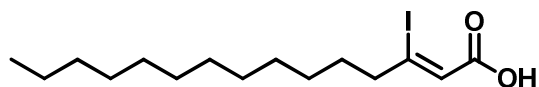

56

To an oven-dried Schlenk flask was added 1-tetradecyne (0.748 g, 3.85 mmol) and THF (10 mL). Chilled to -78 °C. Added n-BuLi (2.7 mL, 4.32 mmol) dropwise then stirred for 10 minutes. Added a large excess of solid carbon dioxide then allowed the reaction to warm to RT. The solvent was evaporated and the residue was purified by silica gel chromatography. Product was collected as a colorless oil (1.01 g, 3.79 mmol, 88% yield). Followed by General Protocol C, 71% yield.

**<sup>1</sup>H-NMR** (CDCl<sub>3</sub>, 500 MHz): δ 6.39 (s, 1H, vinyl CH), 2.72 (t, 2H, *J* = 7 Hz), 1.60 (bp, 2H, *J* = 7.0), 1.33-1.22 (m, 18H), 0.88 (t, 3H, *J* = 7.0 Hz).

**<sup>13</sup>C-NMR** (CDCl<sub>3</sub>, 125 MHz): δ 168.90, 125.50, 124.24, 48.54, 32.07, 29.79, 29.78, 29.74, 29.61, 29.50, 29.46, 29.44, 28.39, 22.85, 14.29.

**HRMS** (ESI-TOF) calcd for C<sub>17</sub>H<sub>17</sub>N<sub>2</sub>O<sub>4</sub> (M+Na)<sup>+</sup>: 389.0954, found: 389.0950.

**Melting Point** Not determined (oil).

**IR** (cm<sup>-1</sup>, thin film in CHCl<sub>3</sub>): 3533 (b, s), 3295 (s), 3080 (m), 2954 (m), 2864 (m), 1651 (s), 1633 (m), 1557 (s), 1538 (m), 1431 (w), 1365 (w), 1330 (w), 1228 (w), 1208 (w).

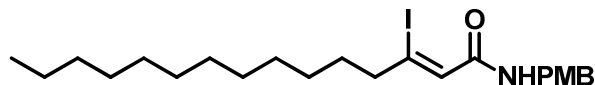

57

Synthesized from **56** and 4-methoxybenzylamine by General Protocol B. 90% yield. Compound is an off-white solid.

**<sup>1</sup>H-NMR** (CDCl<sub>3</sub>, 500 MHz): δ 7.11 (d, 2H, *J* = 8.5 Hz, aryl CH), 6.72 (d, 2H, *J* = 8.5 Hz, aryl CH), 6.31 (s, 1H, vinylic CH), 4.251 (d, 2H, *J* = 5.5 Hz, NCH<sub>2</sub>), 3.66 (s, 3H, OCH<sub>3</sub>), 2.49 (t, 2H, *J* = 7 Hz), 1.47 (bp, 2H, *J* = 7.0), 1.33-1.22 (m, 18H), 0.83 (t, 3H, *J* = 7.0 Hz).

**<sup>13</sup>C-NMR** (CDCl<sub>3</sub>, 125 MHz): δ 164.88, 159.12, 129.96, 129.50, 128.16, 114.77, 114.11, 55.41, 55.37, 55.32, 55.28, 47.25, 43.18, 31.99, 29.70, 29.56, 29.42, 29.30, 28.38, 22.77, 14.22.

**HRMS** (ESI-TOF) calcd for  $C_{17}H_{17}N_2O_4$  ( $M+H$ )<sup>+</sup>: 486.1869, found: 486.1862.

**Melting Point:** 50.2-55.0 °C

**IR** ( $cm^{-1}$ , thin film in  $CHCl_3$ ): 3417 (b, s), 3303 (s), 3066 (m), 2925 (s), 2853 (m), 1651 (s), 1621 (s), 1540 (m), 1513 (s), 1464 (m), 1337 (w), 1302 (2), 1248 (m), 1175 (m), 1084 (w).

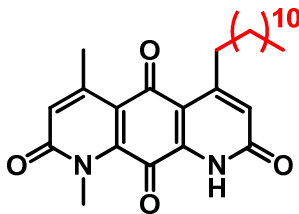

**19**

Synthesized from **70**, (Z)-3-iodo-N-methylbut-2-enamide, and **57** by General Protocols D, E, F, and H. 20% yield over 4 steps. Compound is an orange solid.

**<sup>1</sup>H-NMR** (2:1  $CDCl_3$ : $CD_3OD$ , 500 MHz):  $\delta$  6.78 (s, vinyl  $CH$ ), 6.67 (s, 1H), 3.92 (s, 3H), 3.03 (t,  $J = 7.5$  Hz), 2.64 (d, 3H,  $J = 1.0$  Hz, allylic  $CH_3$ ), 1.58 (p, 2H,  $J = 7.5$  Hz), 1.44 (p, 2H,  $J = 7.5$  Hz), 1.27-1.4 (m, 16H), 0.89 (t, 3H,  $J = 7.5$  Hz).

**<sup>13</sup>C-NMR** ( $d$ -TFA, 125 MHz):  $\delta$  182.21, 176.18, 166.64, 166.55, 165.56, 158.87, 141.347, 140.27, 128.14, 127.13, 126.09, 120.54, 37.93, 36.73, 33.95, 31.84, 31.61 (2H), 31.54, 31.42, 31.38, 31.34, 31.13, 24.50 24.37, 14.79.

**HRMS** (ESI-TOF) calcd for  $C_{26}H_{35}N_2O_4$  ( $M+H$ )<sup>+</sup>: 439.2597, found: 439.2590.

**Melting Point:** >230 °C.

**IR** ( $cm^{-1}$ , thin film in  $CHCl_3$ ): 2954 (w), 2918 (m), 2850 (m), 1677 (s), 1651 (s), 1639 (s), 1587 (w), 1505 (w), 1408 (w), 1352 (w), 1290 (w), 1254 (w), 1160 (w), 1087 (w).

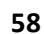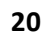

**Melting Point:** >280 °C.

**IR** (cm<sup>-1</sup>, thin film in CHCl<sub>3</sub>): 2982 (b, w), 1677 (w), 1647 (b, s), 1611 (m), 1587 (w), 1396 (w), 1344 (w), 1288 (w).

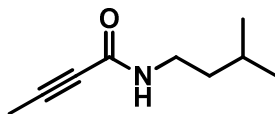

**59**

Synthesized from ethyl-2-butynoate and isoamylamine by General Protocol A. 73% yield. Compound is a white crystalline solid.

**<sup>1</sup>H-NMR** (CDCl<sub>3</sub>, 500 MHz): δ 5.84 (bs, 1H, major rotamer, *NH*), 3.37 (q, 2H, *J* = 7.0 Hz, minor rotamer, *NCH*<sub>2</sub>), 3.27 (q, 2H, *J* = 7.0 Hz, major rotamer, *NCH*<sub>2</sub>), 1.99 (d, 3H, *J* = 1.5 Hz, minor rotamer, allylic *CH*<sub>3</sub>), 1.90 (d, 3H, *J* = 1.5 Hz, major rotamer, allylic *CH*<sub>3</sub>), 1.59 (sept, 1H, *J* = 6.5 Hz, major rotamer, *CH*), 1.38 (q, 2H, *J* = 7.5 Hz, major rotamer *CH*<sub>2</sub>*CH*<sub>2</sub>*CH*), 0.91 (d, 6H, *J* = 6.5 Hz, minor rotamer *CH*(*CH*<sub>3</sub>)<sub>2</sub>), 0.88 (d, 6H, *J* = 6.5 Hz, major rotamer, *CH*(*CH*<sub>3</sub>)<sub>2</sub>)

**<sup>13</sup>C-NMR** (CDCl<sub>3</sub>, 125 MHz) δ 156.19 (minor), 153.45 (major), 89.12 (minor), 82.24 (major), 74.74 (major), 72.37 (minor), 41.28 (minor), 39.12 (minor), 37.70 (major), 37.63 (major), 25.40 (major), 25.05 (minor), 22.02 (major), 3.50 (minor), 3.22 (major).

**HRMS** (ESI) calcd for C<sub>9</sub>H<sub>16</sub>NO (*M*+*H*)<sup>+</sup>: 154.1232, found: 154.1233.

**Melting Point:** 42.2-43.3 °C.

**IR** (cm<sup>-1</sup>, thin film in CHCl<sub>3</sub>): 3626 (b, s), 3303 (s), 3073 (m), 2955 (m), 2871 (w), 2256 (w), 2219 (w), 1651 (s), 1557 (m), 1470 (w), 1455 (w), 1368 (w), 1299 (w), 1230 (w), 1158 (w).

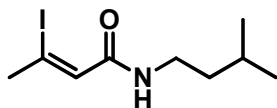

**60**

Synthesized from **59** by General Protocol C. 95% yield. Compound is a light gold oil.

**<sup>1</sup>H-NMR** (CDCl<sub>3</sub>, 500 MHz): δ 6.22 (q, 1H, *J* = 1.5 Hz, vinyl CH), 5.82 (bs, 1H, NH), 3.33 (dq, 2H, *J* = 7.5, 1.0 Hz), 2.63 (d, 3H, *J* = 1.5 Hz, allylic CH<sub>3</sub>), 1.64 (sept, 1H, *J* = 6.5 Hz), 1.43 (q, 2H, *J* = 7.0 Hz), 0.91 (d, 6H, *J* = 6.5 Hz).

**<sup>13</sup>C-NMR** (CDCl<sub>3</sub>, 125 MHz) δ 165.02, 129.91, 105.08, 50.64, 35.74, 31.98, 27.43, 27.20.

**HRMS** (ESI-TOF) calcd for C<sub>9</sub>H<sub>17</sub>NOI (M+H)<sup>+</sup>: 282.0355, found: 282.0351.

**Melting Point** Not determined (oil).

**IR** (cm<sup>-1</sup>, thin film in CDCl<sub>3</sub>): 3519 (b, w), 3307 (s), 3074 (m), 2957 (s), 1651 (s), 1633 (s), 1538 (s), 1470 (m), 1455 (m), 1434 (w), 1367 (w), 1231 (w), 1090 (w).

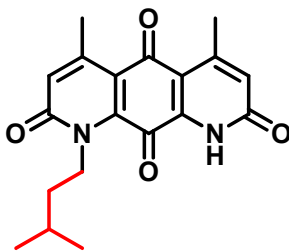

**21**

Synthesized from **70**, (Z)-3-iodo-N-(4-methoxybenzyl)but-2-enamide, and **60** by General Protocols D, E, F, and H. 12% yield over 4 steps. Compound is a red solid.

**<sup>1</sup>H-NMR** (2:1 CDCl<sub>3</sub>:CD<sub>3</sub>OD, 500 MHz): δ 6.76 (q, 1H, *J* = 1.0 Hz, vinyl CH), 6.67 (q, 1H, *J* = 1.5 Hz, vinyl CH), 4.52-4.49 (m, 2H), 2.64 (d, 3H, *J* = 1.0 Hz, allylic CH<sub>3</sub>), 2.63 (d, 3H, *J* = 1.0 Hz, allylic CH<sub>3</sub>), 1.81 (sept, 1H, *J* = 7.0 Hz, CH), 1.68-1.63 (m, 2H, CH<sub>2</sub>CH<sub>2</sub>CH), 1.03 (d, 6H, *J* = 6.5 Hz, CH(CH<sub>3</sub>)<sub>2</sub>).

**<sup>13</sup>C-NMR** (2:1 CDCl<sub>3</sub>:CD<sub>3</sub>OD, 125 MHz): δ 181.48, 175.02, 161.83, 161.65, 151.69, 149.89, 139.30, 138.50, 127.42, 127.23, 119.52, 114.77, 45.45, 37.28, 26.49, 22.89, 22.02, 21.83.

**HRMS** (ESI-TOF) calcd for  $C_{19}H_{21}N_2O_4$  ( $M+H$ )<sup>+</sup>: 341.1501, found: 341.1507.

**Melting Point:** >280 °C.

**IR** ( $cm^{-1}$ , thin film in  $CDCl_3$ ): 1684 (m), 1651 (b, s), 1611 (m), 1590 (m), 1469 (w), 1402 (w), 1290 (w), 1261 (w), 1157 (w), 1056 (w).

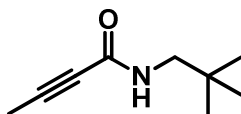

**61**

Synthesized from ethyl-2-butynoate and neopentylamine by General Protocol A. 38% yield. Compound is a white crystalline solid.

**<sup>1</sup>H-NMR** ( $CDCl_3$ , 500 MHz):  $\delta$  5.75 (bs, 1H, major rotamer NH), 3.17 (d, 2H,  $J = 7.0$  Hz, minor rotamer  $NCH_2$ ), 3.09 (d, 2H,  $J = 6.5$  Hz, major rotamer  $NCH_2$ ), 2.01 (s, 3H, minor rotamer allylic  $CH_3$ ), 1.94 (s, 3H, major rotamer allylic  $CH_3$ ), 0.93 (s, 9H, minor rotamer), 0.92 (s, 9H, major rotamer).

**<sup>13</sup>C-NMR** ( $CDCl_3$ , 125 MHz):  $\delta$  156.81, 153.77, 89.95, 83.20, 75.08, 72.77, 55.08, 50.77, 32.22, 31.99, 27.19, 27.07, 4.01, 3.72.

**HRMS** (ESI) calcd for  $C_9H_{16}NO$  ( $M+H$ )<sup>+</sup>: 154.1232, found: 154.1233.

**Melting Point:** 76.5-78.5 °C.

**IR** ( $cm^{-1}$ , thin film in  $CDCl_3$ ): 3310 (b, s), 1961 (m), 2248 (m), 2213 (m), 1651 (s), 1574 (m), 1434 (w), 1366 (w), 1281 (m), 1211 (w).

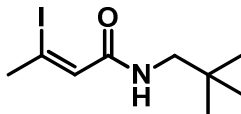

**62**

Synthesized from **61** by General Protocol C. 96% yield. Compound is white amorphous powder.

**<sup>1</sup>H-NMR** (CDCl<sub>3</sub>, 500 MHz): δ 6.29 (q, 1H, *J* = 1.5 Hz, vinyl *CH*), 5.78 (bs, 1H, *NH*), 3.16 (d, 2H, *J* = 6.0 Hz), 2.66 (d, 3H, *J* = 1.0 Hz), 0.96 (s, 9H).

**<sup>13</sup>C-NMR** (CDCl<sub>3</sub>, 125 MHz): δ 165.02, 129.91, 105.08, 50.64, 35.74, 31.98, 27.43, 27.20.

**HRMS** (ESI-TOF) calcd for C<sub>9</sub>H<sub>17</sub>NOI (M+H)<sup>+</sup>: 282.0355, found: 282.0354.

**Melting Point:** 92.3-94.5 °C.

**IR** (cm<sup>-1</sup>, thin film in CDCl<sub>3</sub>): 3442 (b, m), 3298 (s), 3080 (w), 2956 (m), 1652 (s), 1633 (s), 1557 (m), 1463 (w), 1428 (w), 1365 (w), 1228 (m), 1208 (m), 1063 (w).

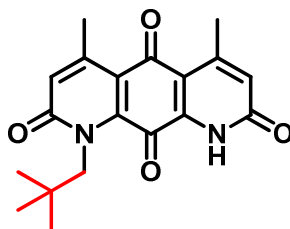

**22**

Synthesized from **70**, (Z)-3-iodo-N-(4-methoxybenzyl)but-2-enamide, and **62** by General Protocols D, E, F, and H. 10% yield over 4 steps. Compound is a red solid.

**<sup>1</sup>H-NMR** (2:1 CDCl<sub>3</sub>:CD<sub>3</sub>OD, 500 MHz): δ 6.75 (d, 1H, *J* = 1.0 Hz, vinyl *CH*), 6.67 (d, 1H, *J* = 1.0 Hz, vinyl *CH*), 4.95 (bs, 1H), 4.86 (bs, 1H), 2.64 (s, 6H, allylic *CH*<sub>3</sub>), 0.87 (s, 9H, (*CH*<sub>3</sub>)<sub>3</sub>).

**<sup>13</sup>C-NMR** (CDCl<sub>3</sub>, 125 MHz): δ 181.20, 176.32, 162.40, 149.55, 141.41, 139.05, 127.31, 127.19, 119.33, 114.87, 51.10, 34.31, 27.58, 22.80, 21.67.

**HRMS** (ESI-TOF) calcd for C<sub>19</sub>H<sub>21</sub>N<sub>2</sub>O<sub>4</sub> (M+H)<sup>+</sup>: 341.1501, found: 341.1498.

**Melting Point:** >270 °C.

**IR** (cm<sup>-1</sup>, thin film in CHCl<sub>3</sub>): 1663 (s), 1651 (s), 1628 (s), 1462 (w), 1396 (w), 1367 (w), 1301 (w), 1106 (w), 1073 (w).

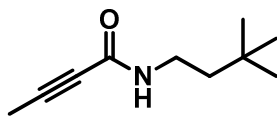

**63**

Synthesized ethyl-2-butynoate and 3,3-dimethylbutan-1-amine by General Protocol A. 76% yield. Compound is a white amorphous solid.

**<sup>1</sup>H-NMR** (CDCl<sub>3</sub>, 500 MHz): δ 6.00 (bs, 1H, minor rotamer NH), 5.60 (bs, 1H, major rotamer NH), 3.39 (m, 2H, minor rotamer NCH<sub>2</sub>), 3.29 (m, 2H, major rotamer NCH<sub>2</sub>), 2.02 (s, 3H, minor rotamer allylic CH<sub>3</sub>), 1.93 (s, 3H, major rotamer allylic CH<sub>3</sub>), 1.46 (m, 2H, minor rotamer), 1.42 (m, 2H, major rotamer), 0.94 (s, 9H, minor rotamer), 0.92 (s, 9H, major rotamer).

**<sup>13</sup>C-NMR** (CDCl<sub>3</sub>, 125 MHz): δ 153.56, 82.97, 75.14, 43.10, 36.64, 30.04, 29.49, 3.78.

**HRMS** (ESI) calcd for C<sub>10</sub>H<sub>18</sub>NO (M+H)<sup>+</sup>: 168.1388, found: 168.1387.

**Melting Point:** 70.5-72.0 °C.

**IR** (cm<sup>-1</sup>, thin film in CDCl<sub>3</sub>): 3289 (b, m), 3064 (w), 2955 (s), 2255(m), 2216 (m), 1636 (s), 1540 (s), 1473 (m), 1365 (m), 1309 (m), 1286 (m), 1189 (w), 1075 (w).

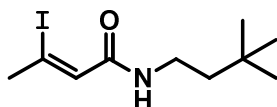

**64**

Synthesized from **63** by General Protocol C. 93% yield. Compound is a pale brown oil.

**<sup>1</sup>H-NMR** (CDCl<sub>3</sub>, 500 MHz): δ 6.21 (q, 1H, *J* = 1.5 Hz, vinyl CH), 6.02 (bs, 1H, NH), 3.31-3.27 (m, 2H), 2.61 (d, 3H, *J* = 1.5 Hz, NCH<sub>3</sub>), 1.44-1.41 (m, 2H), 0.89 (s, 9H).

**<sup>13</sup>C-NMR** (CDCl<sub>3</sub>, 125 MHz): δ 164.78, 129.39, 105.53, 43.17, 36.31, 35.77, 30.02, 29.50.

**HRMS** (ESI-TOF) calcd for C<sub>10</sub>H<sub>19</sub>NOI (M+H)<sup>+</sup>: 296.0511, found: 296.0513.

**Melting Point** Not determined (oil).

**IR** (cm<sup>-1</sup>, thin film, neat): 3289 (b, m), 3073 (w), 2955 (s), 2857 (m), 1653 (s), 1621 (m), 1541 (s), 1474 (w), 1431 (w), 1364 (w), 1333(w), 1229 (m), 1074 (w).



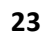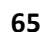

$CH_3$ ), 0.92 (m, 1H,  $J = 0.9$  Hz,  $NCH_2CH(CH_2)_2$ ), 0.48 (m, 2H,  $NCH_2CH(CH_2)_2$ ), 0.19 (m, 2H,  $NCH_2CH(CH_2)_2$ ).

**$^{13}C$ -NMR** ( $CDCl_3$ , 125 MHz):  $\delta$  153.47 (major), 83.15 (major), 76.90 (major), 48.22 (minor), 44.66 (major), 11.52 (minor), 10.55 (major), 3.73 (major), 3.52 (major).

**HRMS** (ESI) calcd for  $C_8H_{12}NO$  ( $M+H$ ) $^+$ : 138.0919, found: 138.0916.

**Melting Point** Not determined (oil).

**IR** ( $cm^{-1}$ , thin film in  $CCl_4$ ): 3276 (b, m), 3080 (b, w), 2964 (w), 2253 (m), 2217 (m), 1632 (s), 1536 (s), 1437 (m) 1287 (s), 1168 (w).

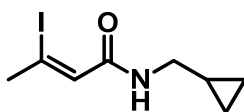

**66**

Synthesized from **65** by General Protocol C. 65% yield. Compound is a yellow/orange oily solid.

**$^1H$ -NMR** ( $CDCl_3$ , 500 MHz):  $\delta$  6.24 (d, 1H,  $J = 1.5$  Hz, vinyl  $CH$ ), 5.80 (bs, 1H,  $NH$ ), 3.20 (dd, 2H,  $J = 5.5$  and 1.0 Hz,  $NCH_2CH$ ), 2.66 (d, 3H,  $J = 1.5$  Hz, allylic  $CH_3$ ), 1.01 (m, 1H,  $NCH_2CH(CH_2)_2$ ), 0.53 (m, 2H,  $NCH_2CH(CH_2)_2$ ), 0.24 (m, 2H,  $NCH_2CH(CH_2)_2$ ).

**$^{13}C$ -NMR** ( $CDCl_3$ , 125 MHz):  $\delta$  164.81, 129.47, 105.71, 44.41, 35.76, 10.63, 3.64.

**HRMS** (ESI-TOF) calcd for  $C_8H_{13}NOI$  ( $M+H$ ) $^+$ : 266.0042, found: 266.0041.

**Melting Point** Not determined.

**IR** ( $cm^{-1}$ , thin film in  $CHCl_3$ ): 3438 (w), 2960 (w), 1655 (s), 1620 (m), 1560 (w), 1508 (m) 1466 (m), 1381 (w), 1208 (w), 1094 (w).

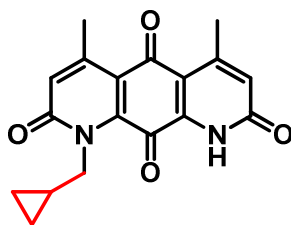

**24**

Synthesized from **70**, (Z)-3-iodo-N-(4-methoxybenzyl)but-2-enamide, and **66** by General Protocols D, E, G, and H. 16% yield over 4 steps. Compound is an orange solid.

**<sup>1</sup>H-NMR** (CDCl<sub>3</sub>, 500 MHz): δ 6.78 (d, 1H, *J* = 1.0 Hz, vinyl *CH*), 6.69 (d, 1H, *J* = 1.5 Hz, vinyl *CH*), 4.61 (d, *J* = 7.0 Hz, 2H), 2.62 (d, 3H, *J* = 1.0 Hz, allylic *CH*<sub>3</sub>), 2.61 (d, 3H, *J* = 1.0 Hz, allylic *CH*<sub>3</sub>), 1.19 (sept, 1H, *J* = 6.5 Hz, *CH*), 0.50 (d, *J* = 6.5 Hz 4H, *CH*(*CH*<sub>2</sub>)<sub>2</sub>).

**<sup>13</sup>C-NMR** (CDCl<sub>3</sub>, 125 MHz): δ 181.73, 175.33, 161.55, 160.55, 151.25, 149.24, 138.83, 137.76, 128.96, 128.46, 119.99, 114.54, 49.24, 23.51, 22.37, 11.54, 4.35. 6-29-11\_BIP2-77\_13C\_u500

**HRMS** (ESI-TOF) calcd for C<sub>18</sub>H<sub>17</sub>N<sub>2</sub>O<sub>4</sub> (M+H)<sup>+</sup>: 325.1188, found: 325.1181.

**Melting Point:** >260 °C.

**IR** (cm<sup>-1</sup>, thin film in CDCl<sub>3</sub>): 1677 (w), 1651 (s), 1632 (w), 1604 (w), 1392 (w), 1375 (w), 1358 (w), 1293 (w), 1205 (w), 1167 (w), 1098 (w).

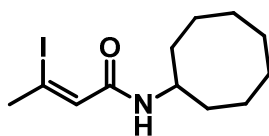

**67**

Synthesized from (Z)-3-iodobut-2-enoic acid and cyclooctylamine by General Protocols B. 92% yield. Compound is a yellow/brown oil.

**<sup>1</sup>H-NMR** (CDCl<sub>3</sub>, 500 MHz): δ 6.19 (d, 1H, *J* = 1.5 Hz, vinyl *CH*), 5.81 (bs, 1H, *NH*), 4.06 (m, 1H, *NCH*), 2.61 (d, 3H, *J* = 1.5 Hz, allylic *CH*<sub>3</sub>), 1.86 (m, 2H), 1.65 (m, 2H), 1.54 (m, 10H).

**<sup>13</sup>C-NMR** (CDCl<sub>3</sub>, 125 MHz): δ 163.76, 129.87, 105.07, 49.56, 35.67, 32.05, 27.27, 25.46, 23.76.

**HRMS** (ESI-TOF) calcd for  $C_{12}H_{21}NOI$  ( $M+H$ )<sup>+</sup>: 322.0668, found: 322.0667.

**Melting Point:** Not determined (oil).

**IR** ( $cm^{-1}$ , thin film in  $CHCl_3$ ): 3424 (w), 3293 (b, m), 3060 (w), 2923 (w), 1649 (s), 1624 (s), 1539 (s), 1473 (m), 1447 (m), 1426 (m), 1375 (w), 1351 (w), 1226 (s), 1128 (w), 1081 (m).

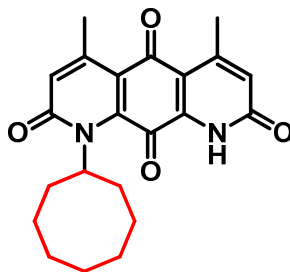

**25**

Synthesized from **70**, (Z)-3-iodo-N-(4-methoxybenzyl)but-2-enamide, and **67** by General Protocols D, E, G, and H. 4% yield over 4 steps. Compound is a yellow/orange oily solid.

**<sup>1</sup>H-NMR** ( $CDCl_3$ , 400 MHz):  $\delta$  6.65 (d, 1H,  $J = 1.0$  Hz, vinyl  $CH$ ), 6.63 (d, 1H,  $J = 1.5$  Hz, vinyl  $CH$ ), 5.02 (m, 1H), 2.60 (d, 3H,  $J = 1.0$  Hz, allylic  $CH_3$ ), 2.55 (d, 3H,  $J = 1.0$  Hz, allylic  $CH_3$ ), 1.79 (m, 14  $HCH_2$ ),

**<sup>13</sup>C-NMR** ( $CDCl_3$ , 125 MHz):  $\delta$  181.71, 175.87, 161.81, 161.07, 151.51, 148.69, 141.52, 138.64, 129.80, 128.02, 120.01, 114.55, 32.97, 26.60, 26.56, 26.31, 23.24, 22.42.

**HRMS** (ESI-TOF) calcd for  $C_{22}H_{25}N_2O_4$  ( $M+H$ )<sup>+</sup>: 381.1814, found: 381.1820.

**Melting Point:** >250 °C.

**IR** ( $cm^{-1}$ , thin film in  $CHCl_3$ ): 2925 (m), 1666 (s), 1651 (s), 1611 (m), 1587 (w), 1470 (w), 1397 (w), 1375 (w), 1354 (w), 1295 (w), 1170 (w), 1110 (w).

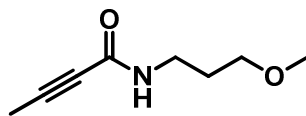

68

Synthesized from ethyl-2-butynoate and 3-methoxypropan-1-amine by General Protocol A. 65% yield. Compound is a clear, colorless oil.

**<sup>1</sup>H-NMR** (CDCl<sub>3</sub>, 500 MHz): δ 6.27 (bs, 1H, major rotamer NH), 6.02 (bs, 1H, minor rotamer NH), 3.46 (t, 2H, *J* = 6.0 Hz), 3.38 (q, 2H, *J* = 6.5 Hz), 3.34 (s, 3H), 1.92 (s, 3H), 1.77 (pent, 2H, *J* = 6.0 Hz).

**<sup>13</sup>C-NMR** (CDCl<sub>3</sub>, 125 MHz): δ 156.37 (minor), 153.62 (major), 89.82 (minor), 82.95 (major), 75.00 (major), 72.58 (minor), 71.28 (major), 70.45 (minor), 58.77 (major), 41.34 (minor), 38.04 (major), 30.15 (minor), 28.87 (major), 3.97 (minor), 3.64 (major).

**HRMS** (ESI-TOF) calcd for C<sub>8</sub>H<sub>14</sub>NO<sub>2</sub> (M+H)<sup>+</sup>: 156.1025, found: 156.1029.

**Melting Point** Not determined (oil).

**IR** (cm<sup>-1</sup>, thin film, neat): 3491 (b, m), 3273 (s), 3064 (w), 2928 (s), 2829 (w), 2255 (m), 2222 (m), 1651 (s), 1539 (s), 1446 (m), 1391 (w), 1287 (m), 1225 (w), 1191 (w), 1114 (m), 1029 (w).

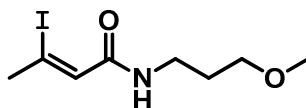

69

Synthesized from **68** by General Protocol C. 96% yield. Compound is a light yellow oil.

**<sup>1</sup>H-NMR** (CDCl<sub>3</sub>, 500 MHz): δ 6.26 (bs, 1H, NH), 6.21 (d, 1H, *J* = 1.0 Hz, vinyl CH), 3.49 (t, 2H, *J* = 6.0 Hz), 3.42 (q, 2H, *J* = 6.5 Hz), 3.34 (s, 3H), 2.64 (d, 3H, *J* = 1.5 Hz), 1.81 (pent, 2H, *J* = 6.0 Hz).

**<sup>13</sup>C-NMR** (CDCl<sub>3</sub>, 125 MHz): δ 164.90, 129.40, 105.51, 71.65, 58.93, 38.02, 35.78, 29.07.

**HRMS** (ESI-TOF) calcd for C<sub>8</sub>H<sub>15</sub>NO<sub>2</sub>I (M+H)<sup>+</sup>: 284.0148, found: 284.0147.

**Melting Point** Not determined (oil).

**IR** (cm<sup>-1</sup>, thin film, neat): 3491 (m), 3290 (s), 3069 (m), 2927 (s), 2872 (s), 1651 (s), 1538 (s), 1434 (m), 1374 (w), 1336 (w), 1229 (s), 1190 (m), 1080 (m), 1031 (w).

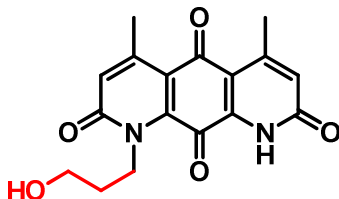

**26**

Synthesized from **70**, (Z)-3-iodo-N-(4-methoxybenzyl)but-2-enamide, and **69** by General Protocols D, E, G, and H. 22% yield over 4 steps. Compound is an orange solid.

**<sup>1</sup>H-NMR** (2:1 CDCl<sub>3</sub>:CD<sub>3</sub>OD, 500 MHz): δ 6.76 (d, 1H, *J* = 1.0 Hz, vinyl *CH*), 6.65 (d, 1H, *J* = 1.0 Hz, vinyl *CH*), 4.58 (t, 2H, *J* = 7.5 Hz), 3.70 (t, 2H, *J* = 6.0 Hz), 2.63 (d, 3H, *J* = 1.0 Hz, allylic *CH*<sub>3</sub>), 2.63 (d, 3H, *J* = 1.0 Hz, allylic *CH*<sub>3</sub>), 2.06-2.01 (m, 2H).

**<sup>13</sup>C-NMR** (CDCl<sub>3</sub>, 125 MHz): δ 181.76, 175.59, 162.35, 151.91, 150.60, 140.16, 139.33, 127.45, 127.40, 119.76, 115.06, 59.79, 44.48, 31.66, 23.21, 22.15.

**HRMS** (ESI-TOF) calcd for C<sub>17</sub>H<sub>17</sub>N<sub>2</sub>O<sub>5</sub> (M+H)<sup>+</sup>: 329.1137, found: 329.1129.

**Melting Point:** >270 °C.

**IR** (cm<sup>-1</sup>, thin film in CHCl<sub>3</sub>): 3446 (b, s), 1646 (s), 1642 (s), 1635 (s), 1392 (w), 1373 (w), 1306 (w), 1292 (w).

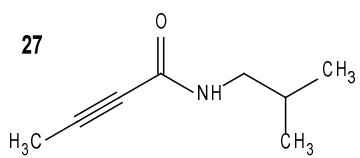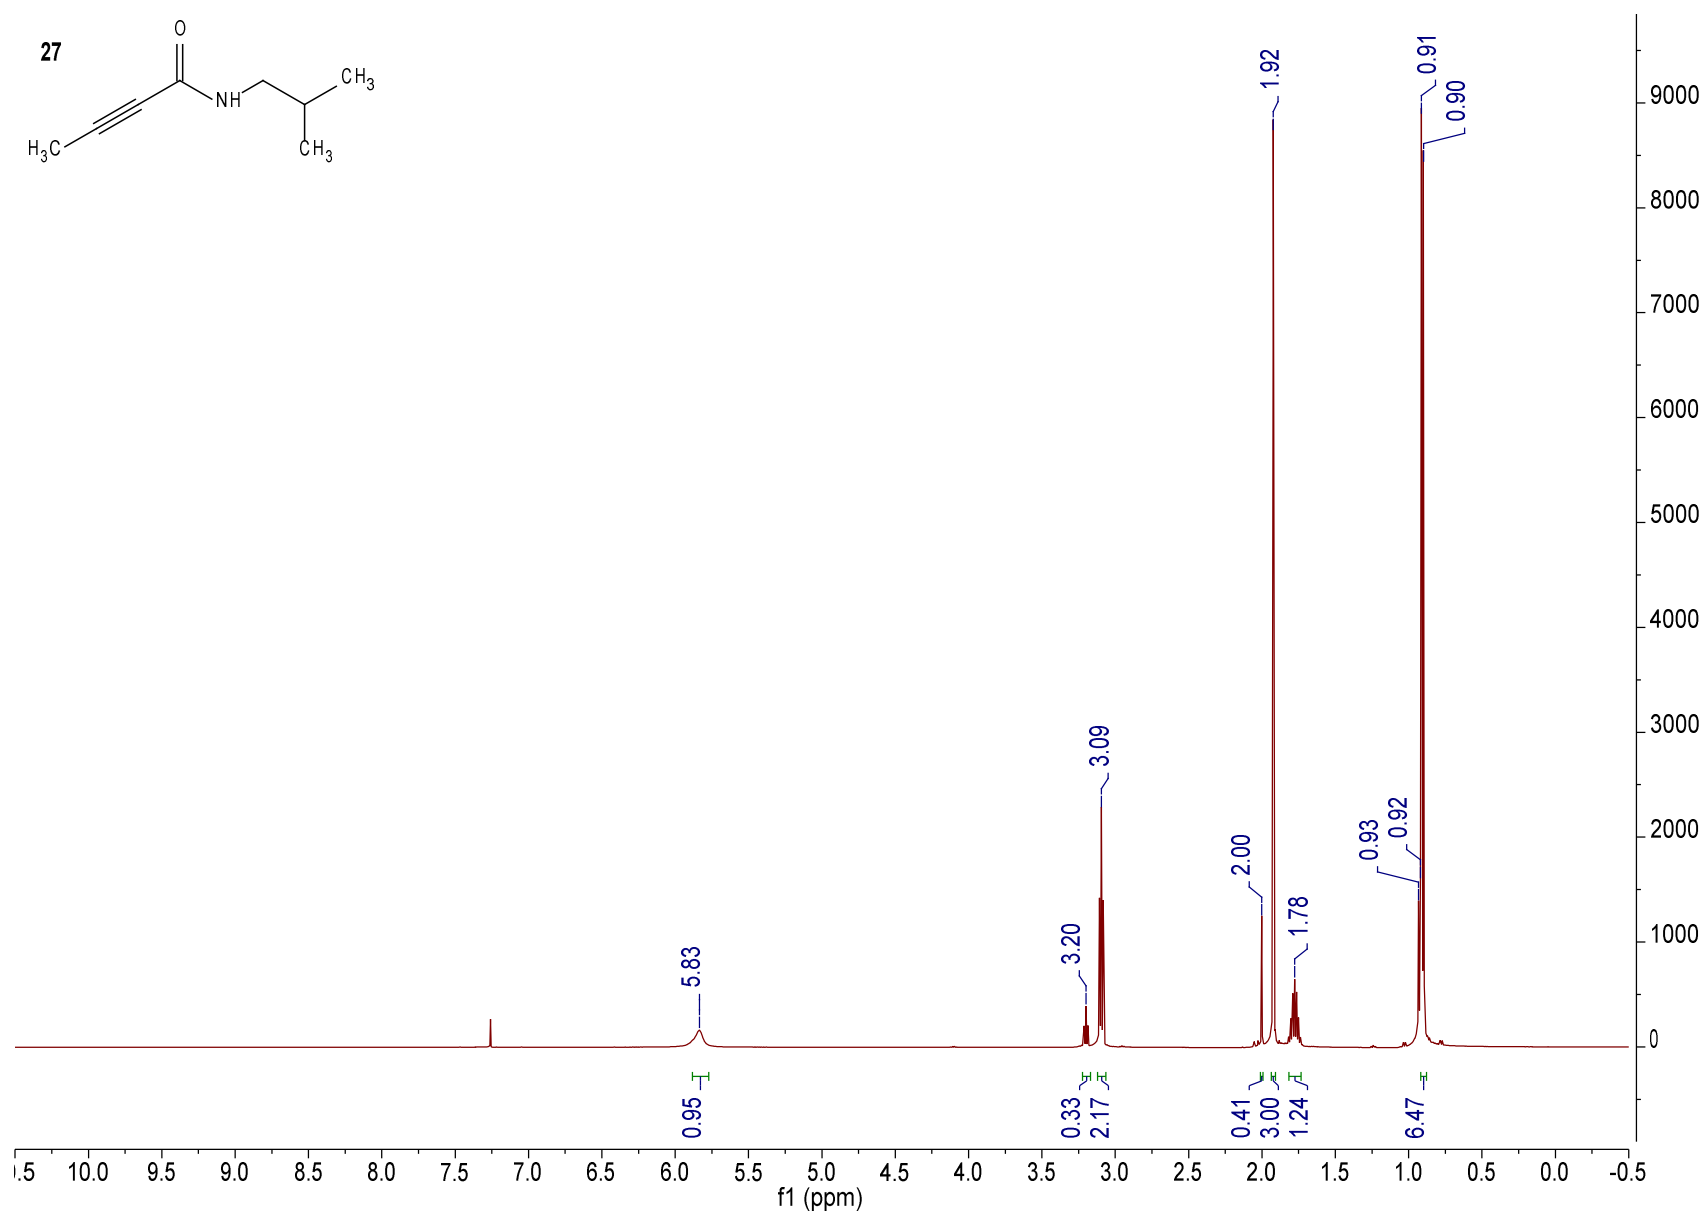

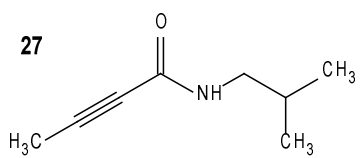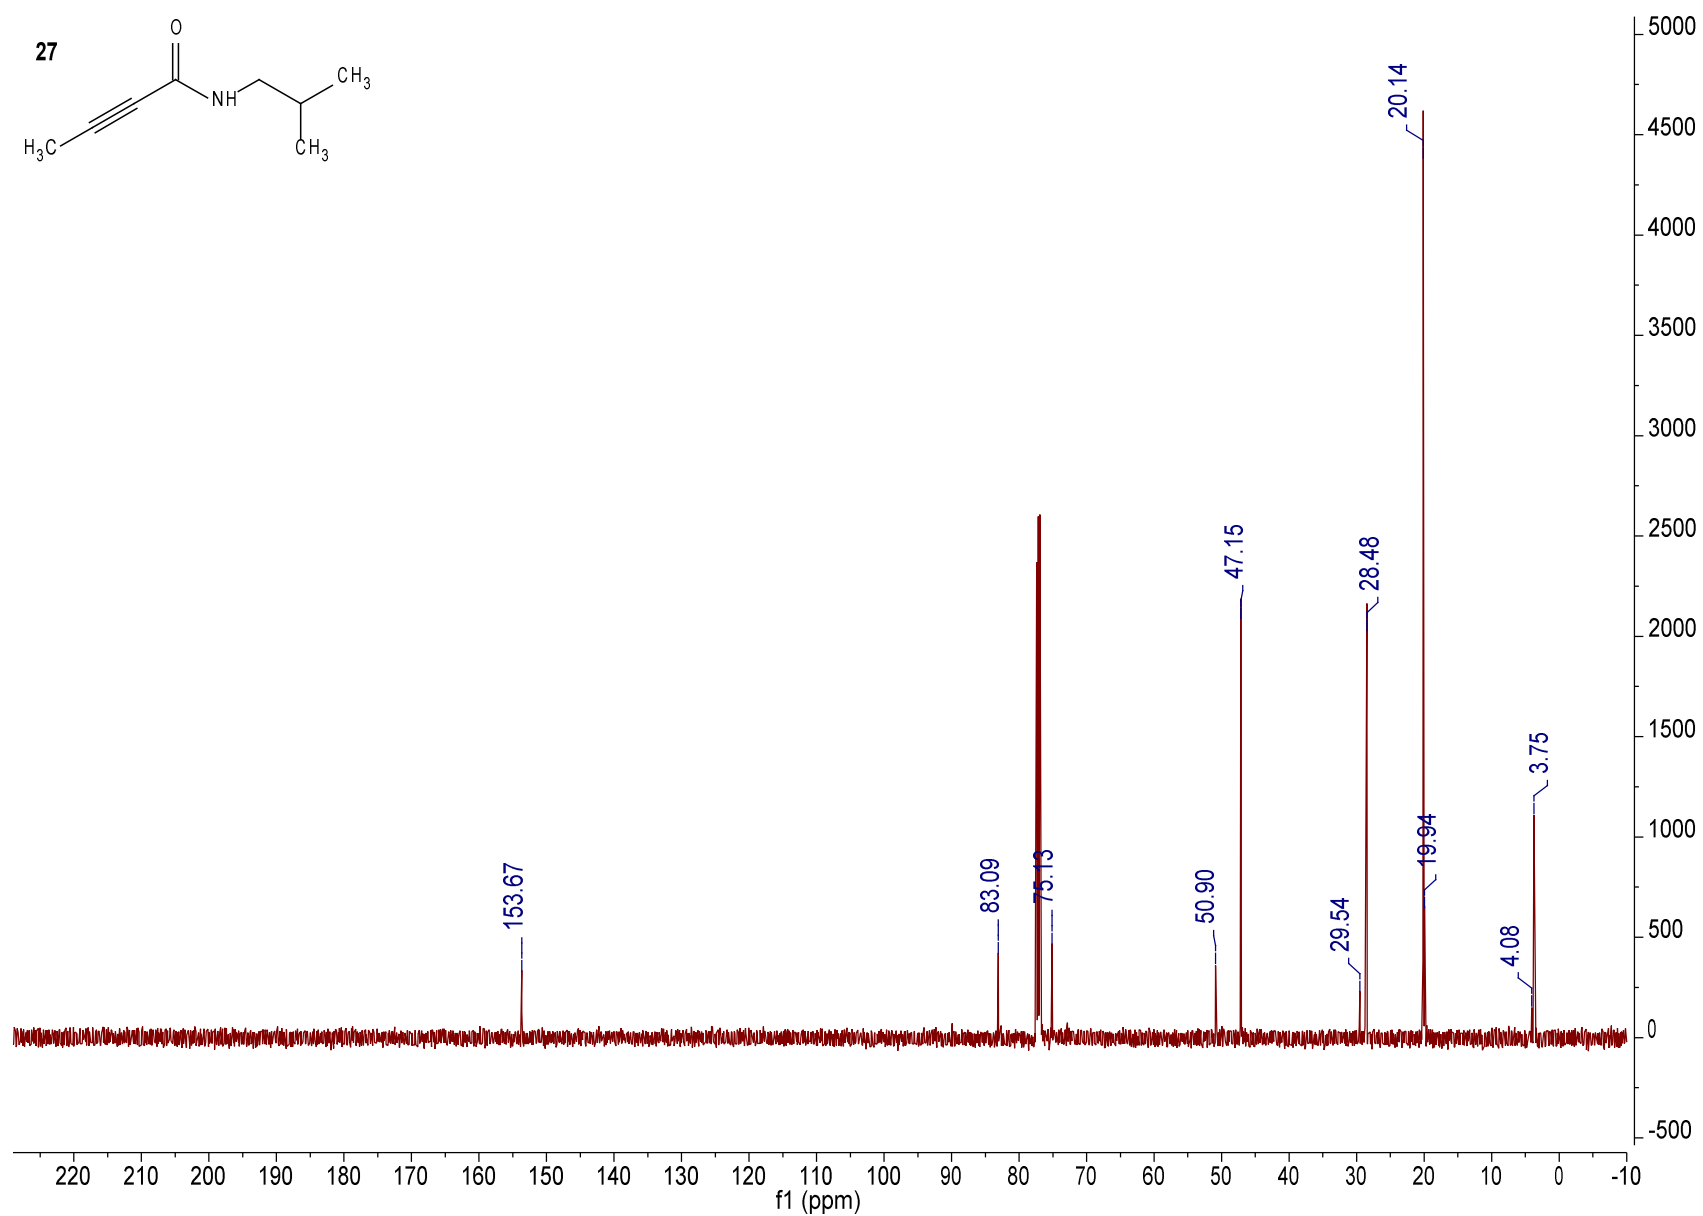



28

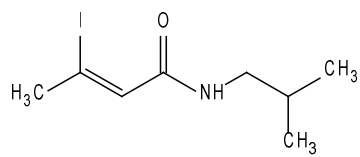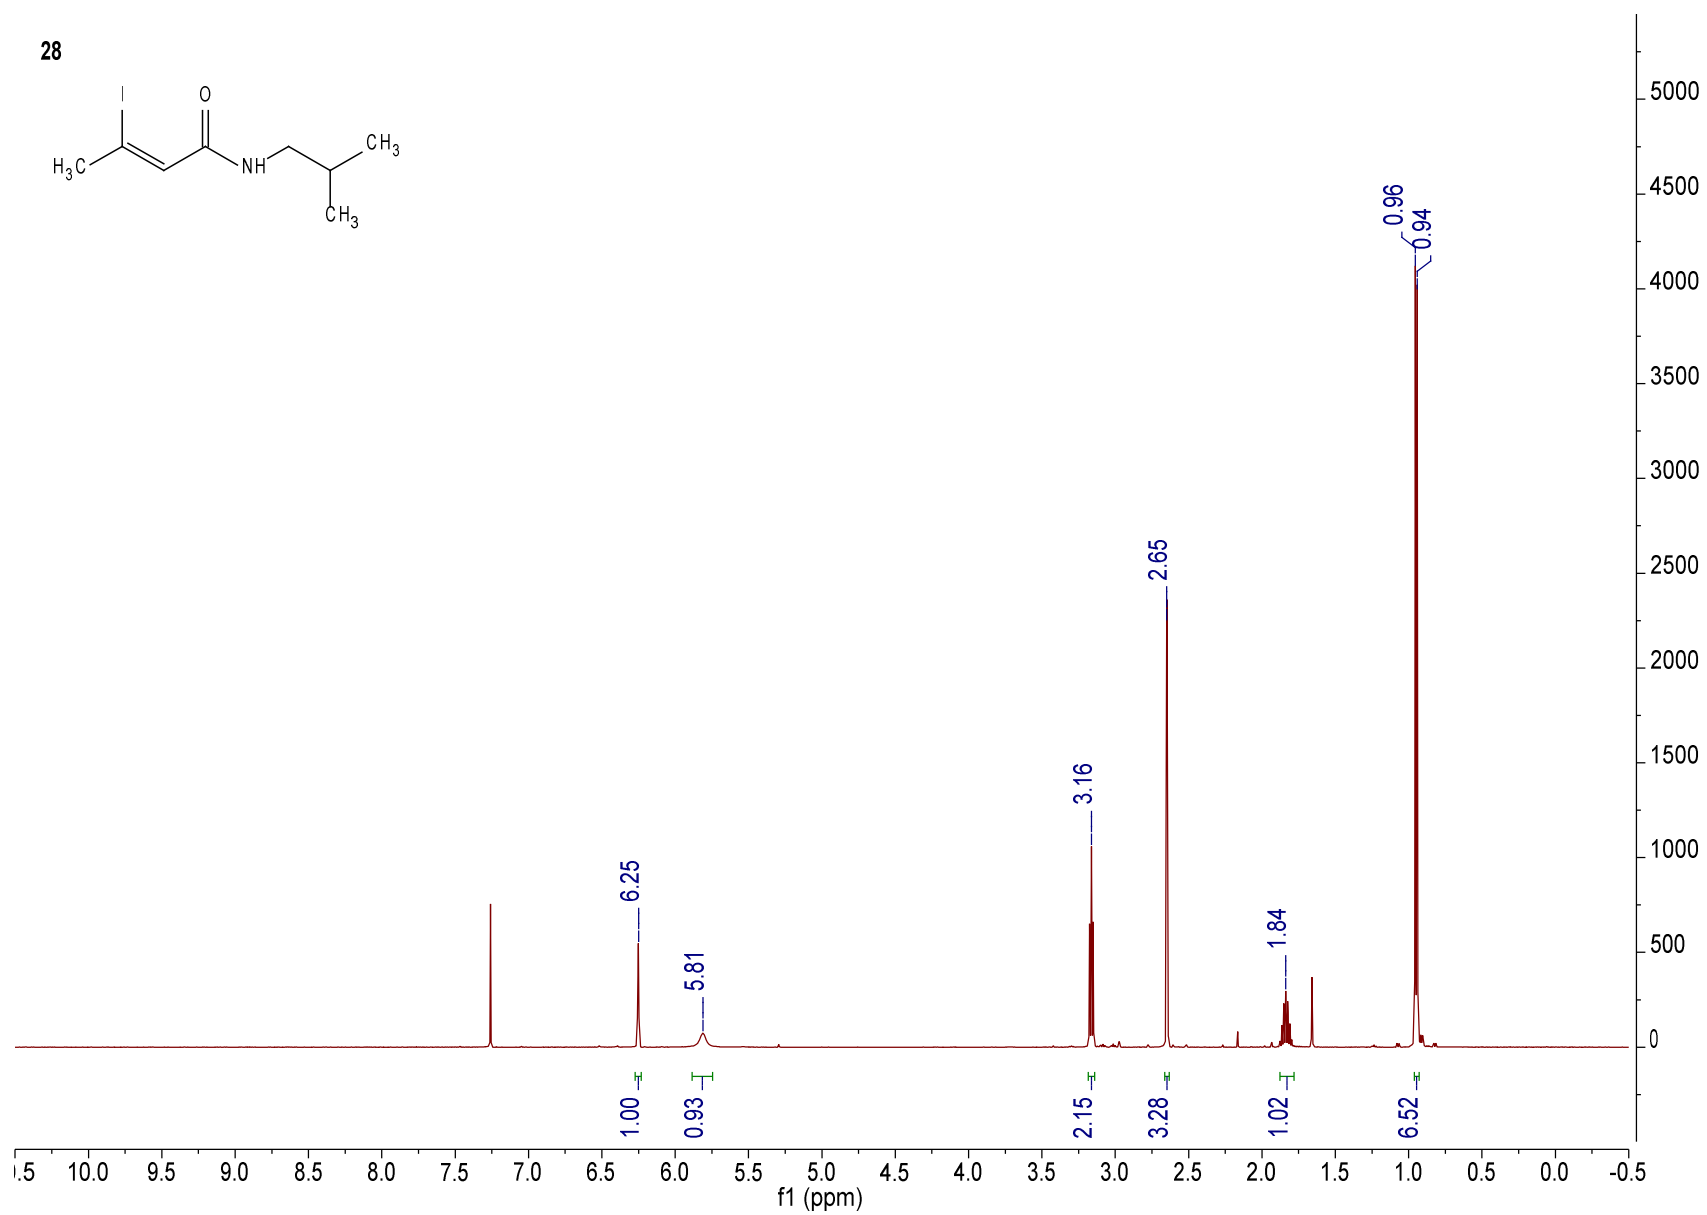

28

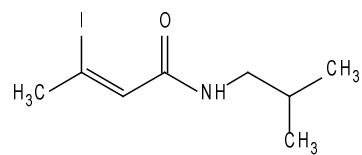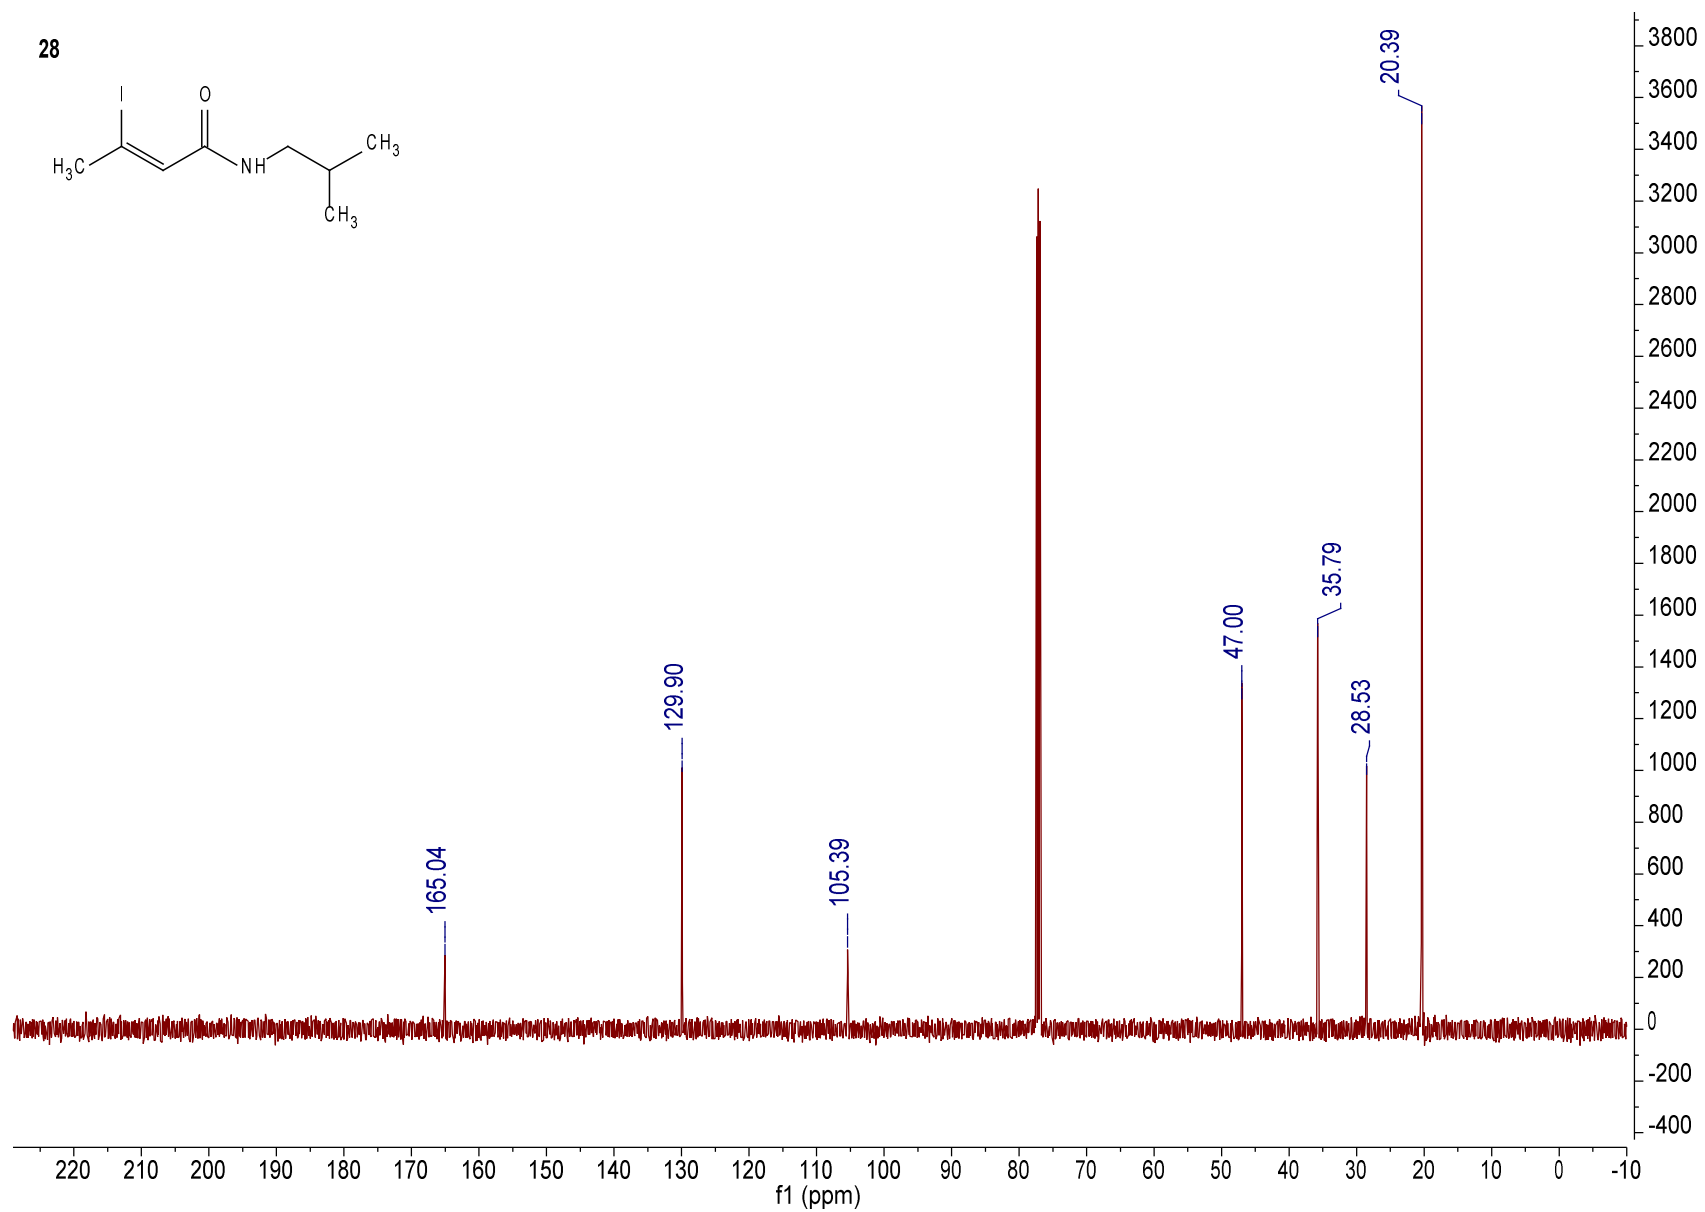

2

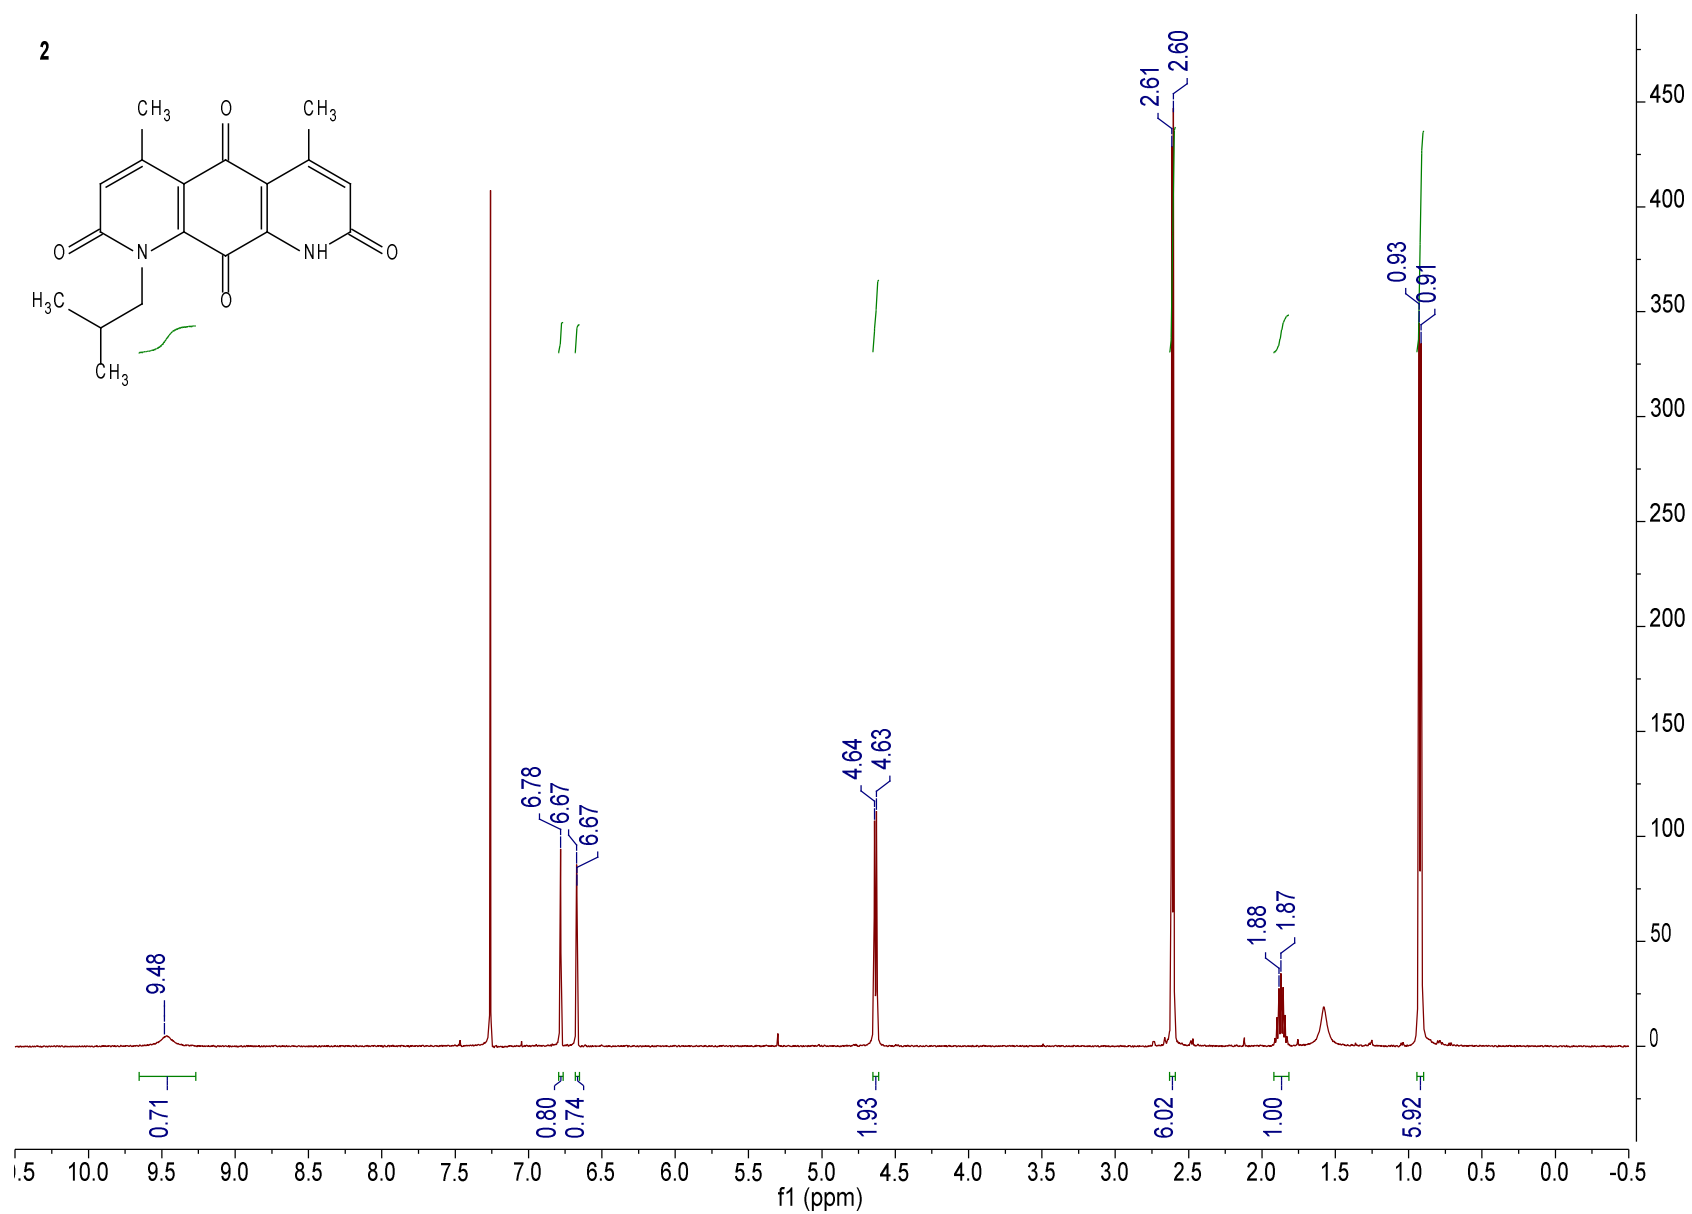

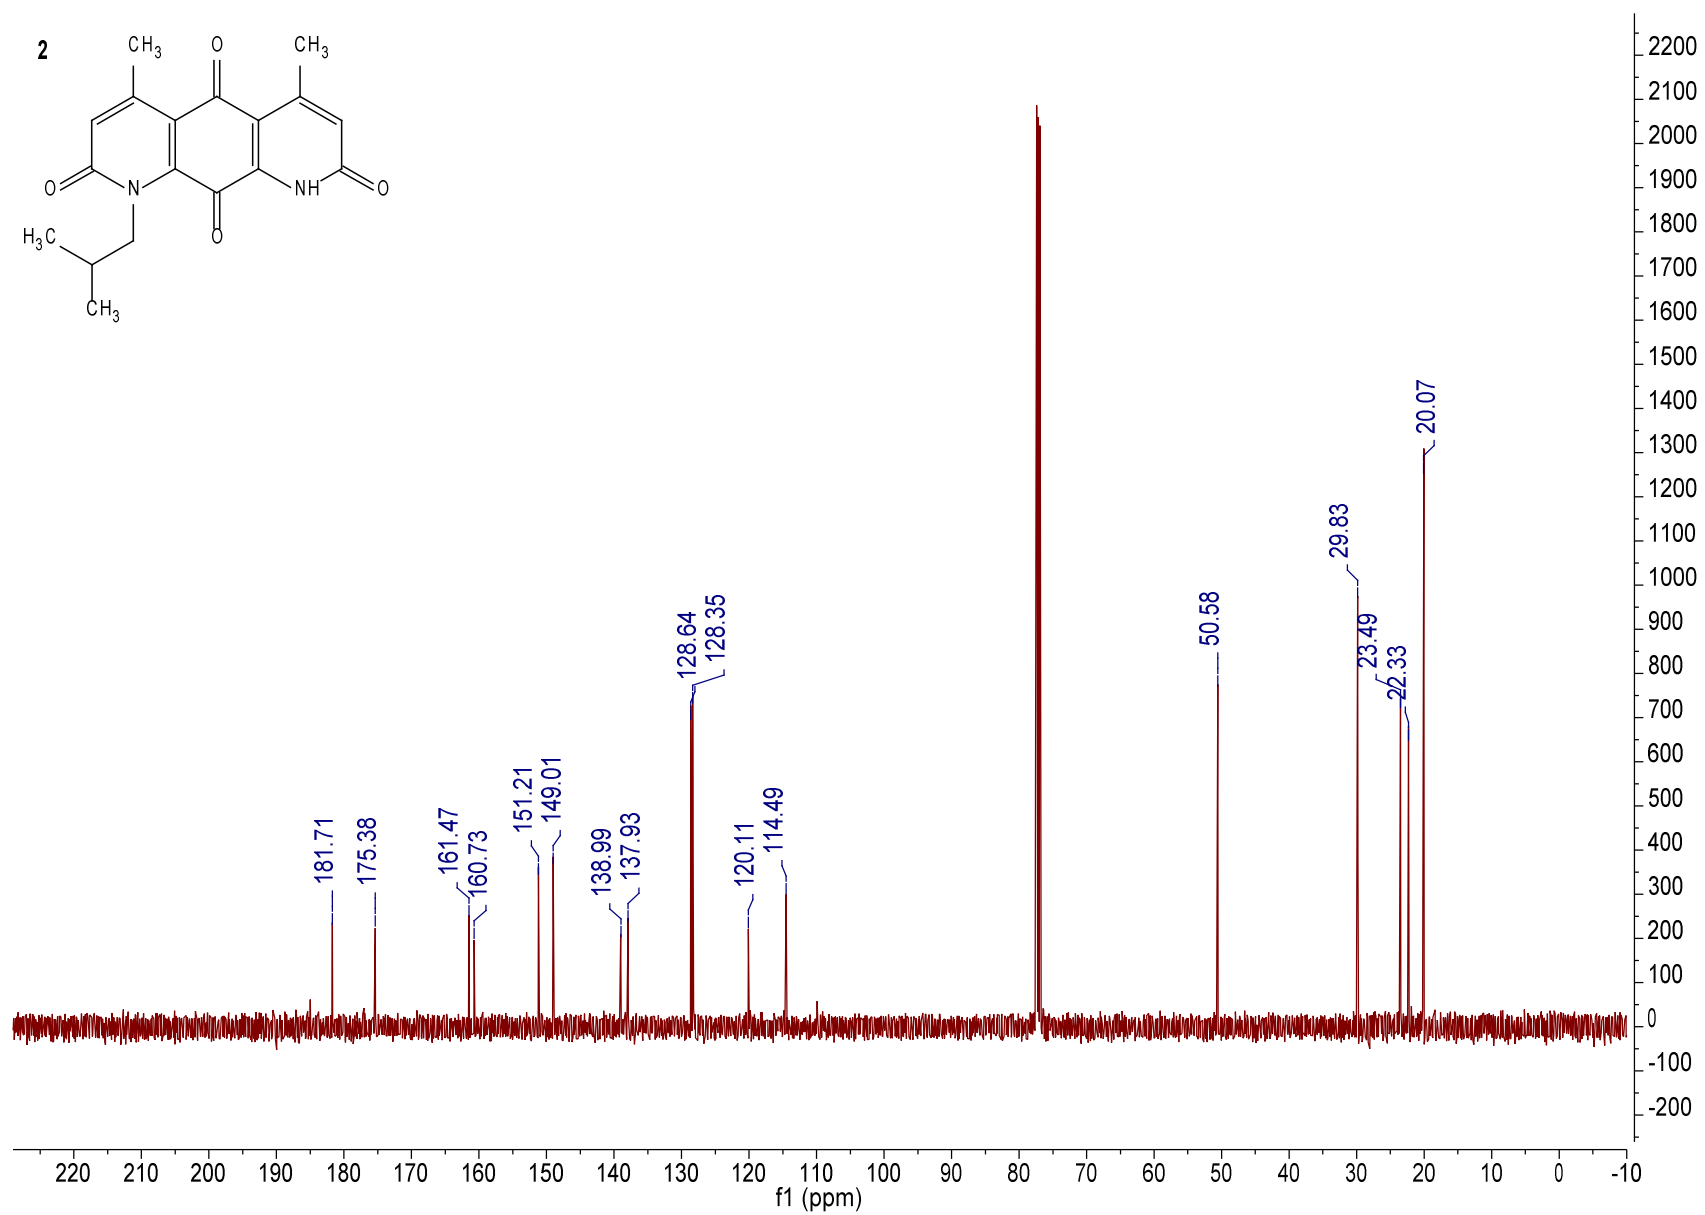

29

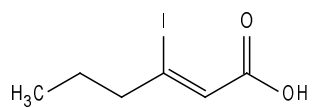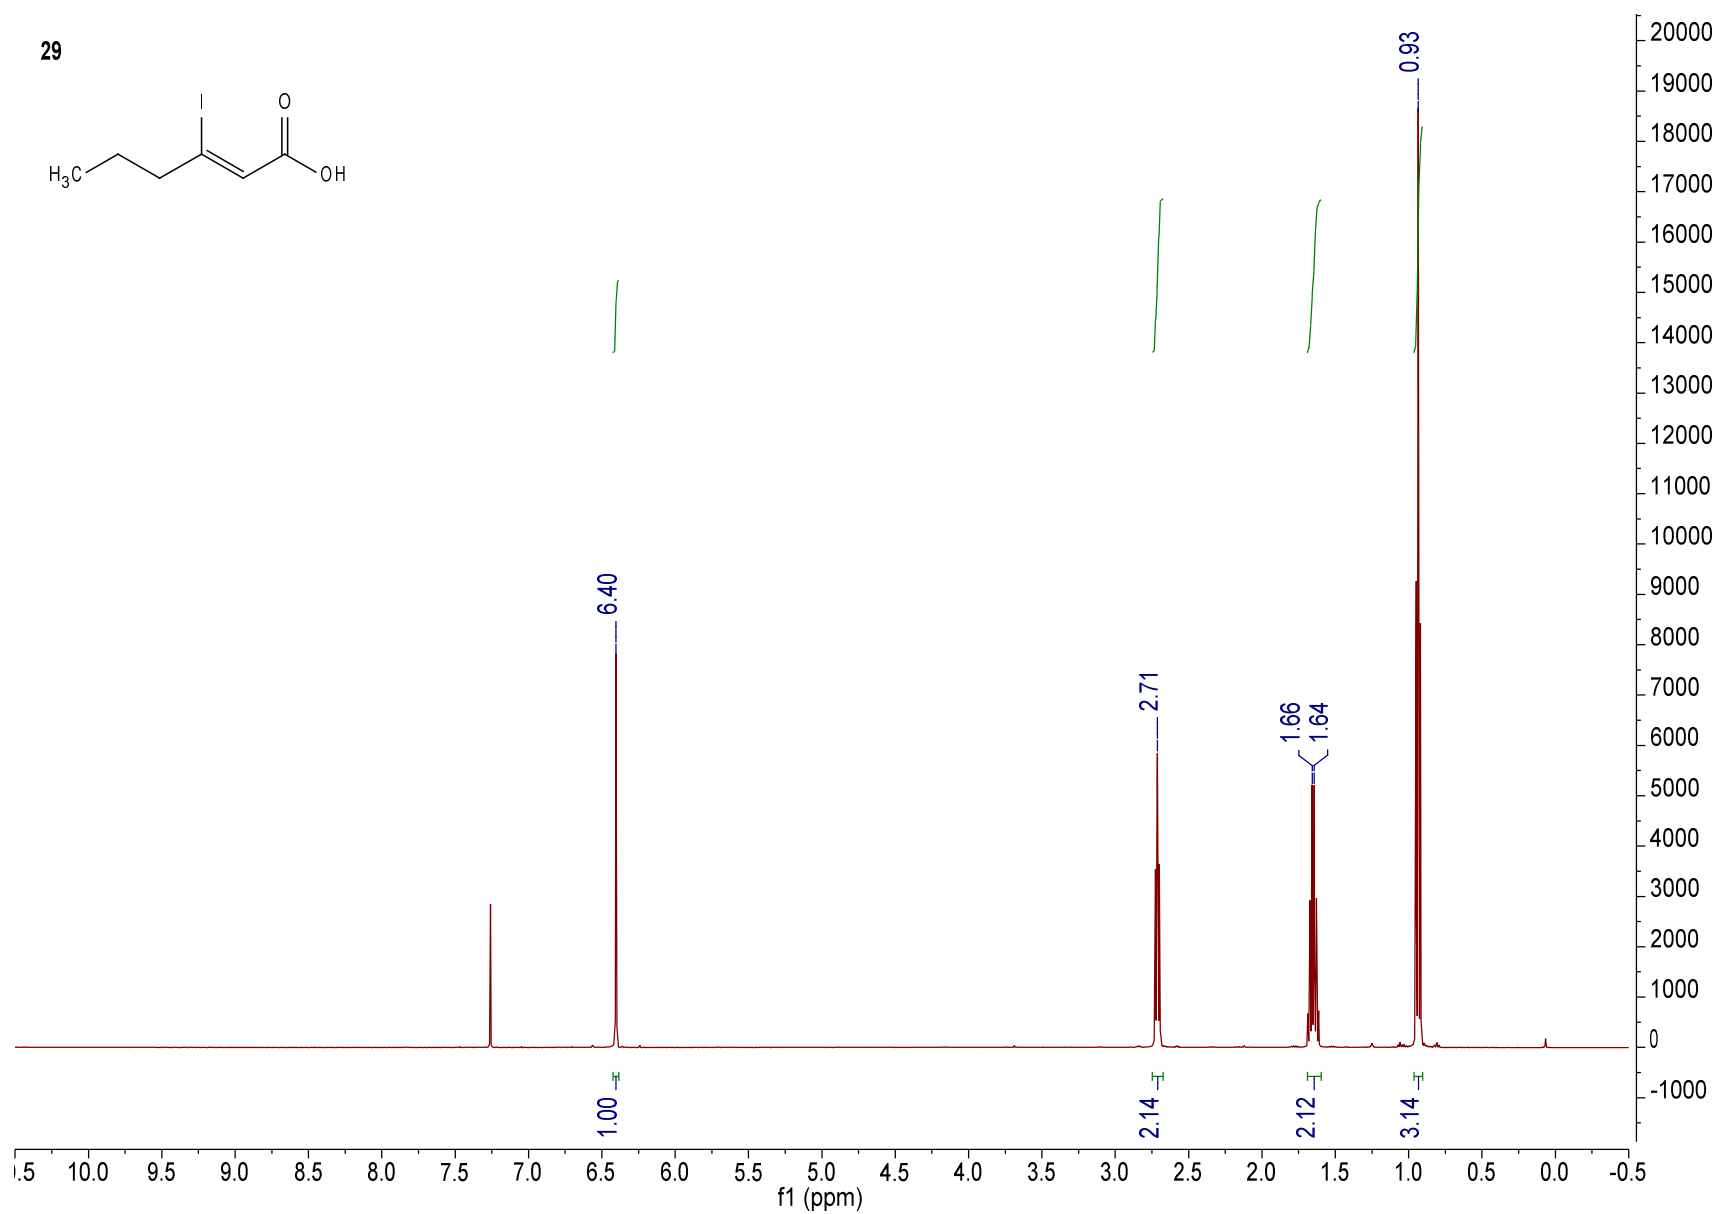

29

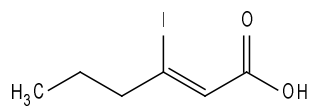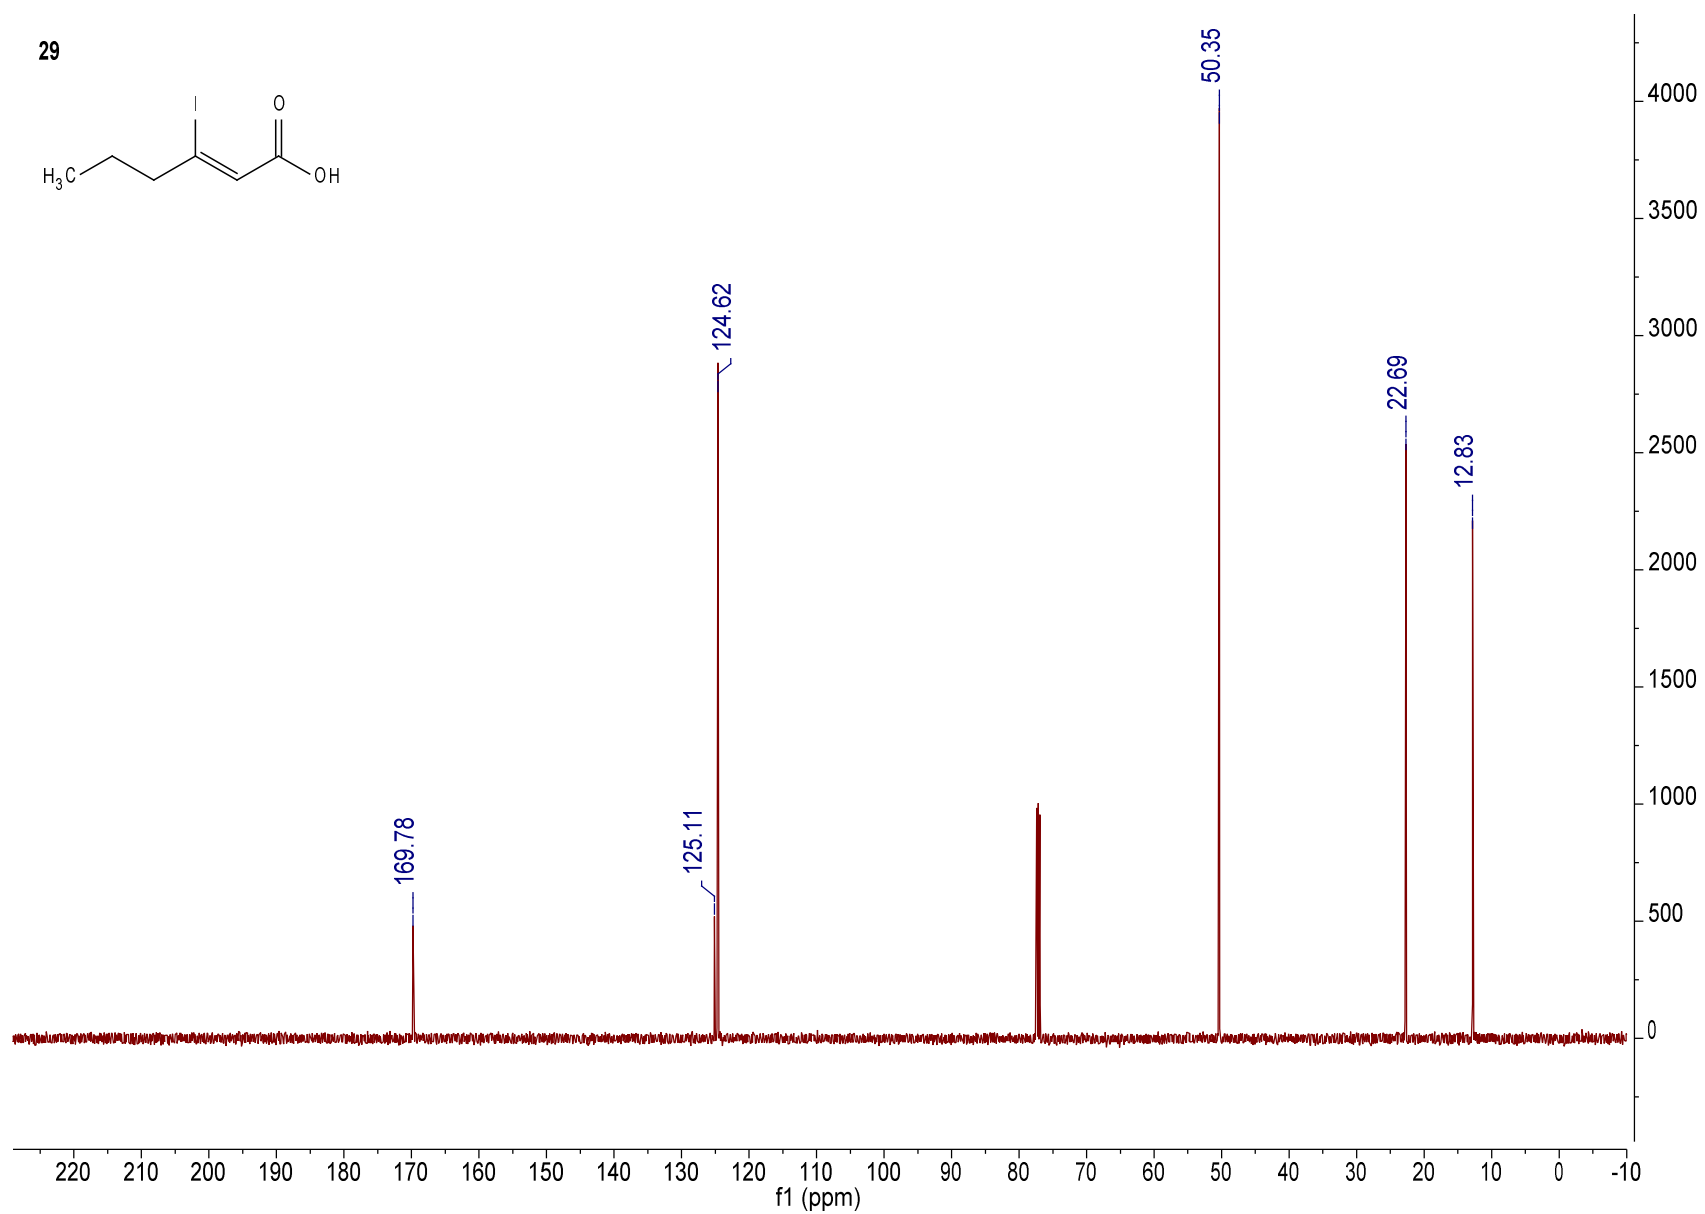

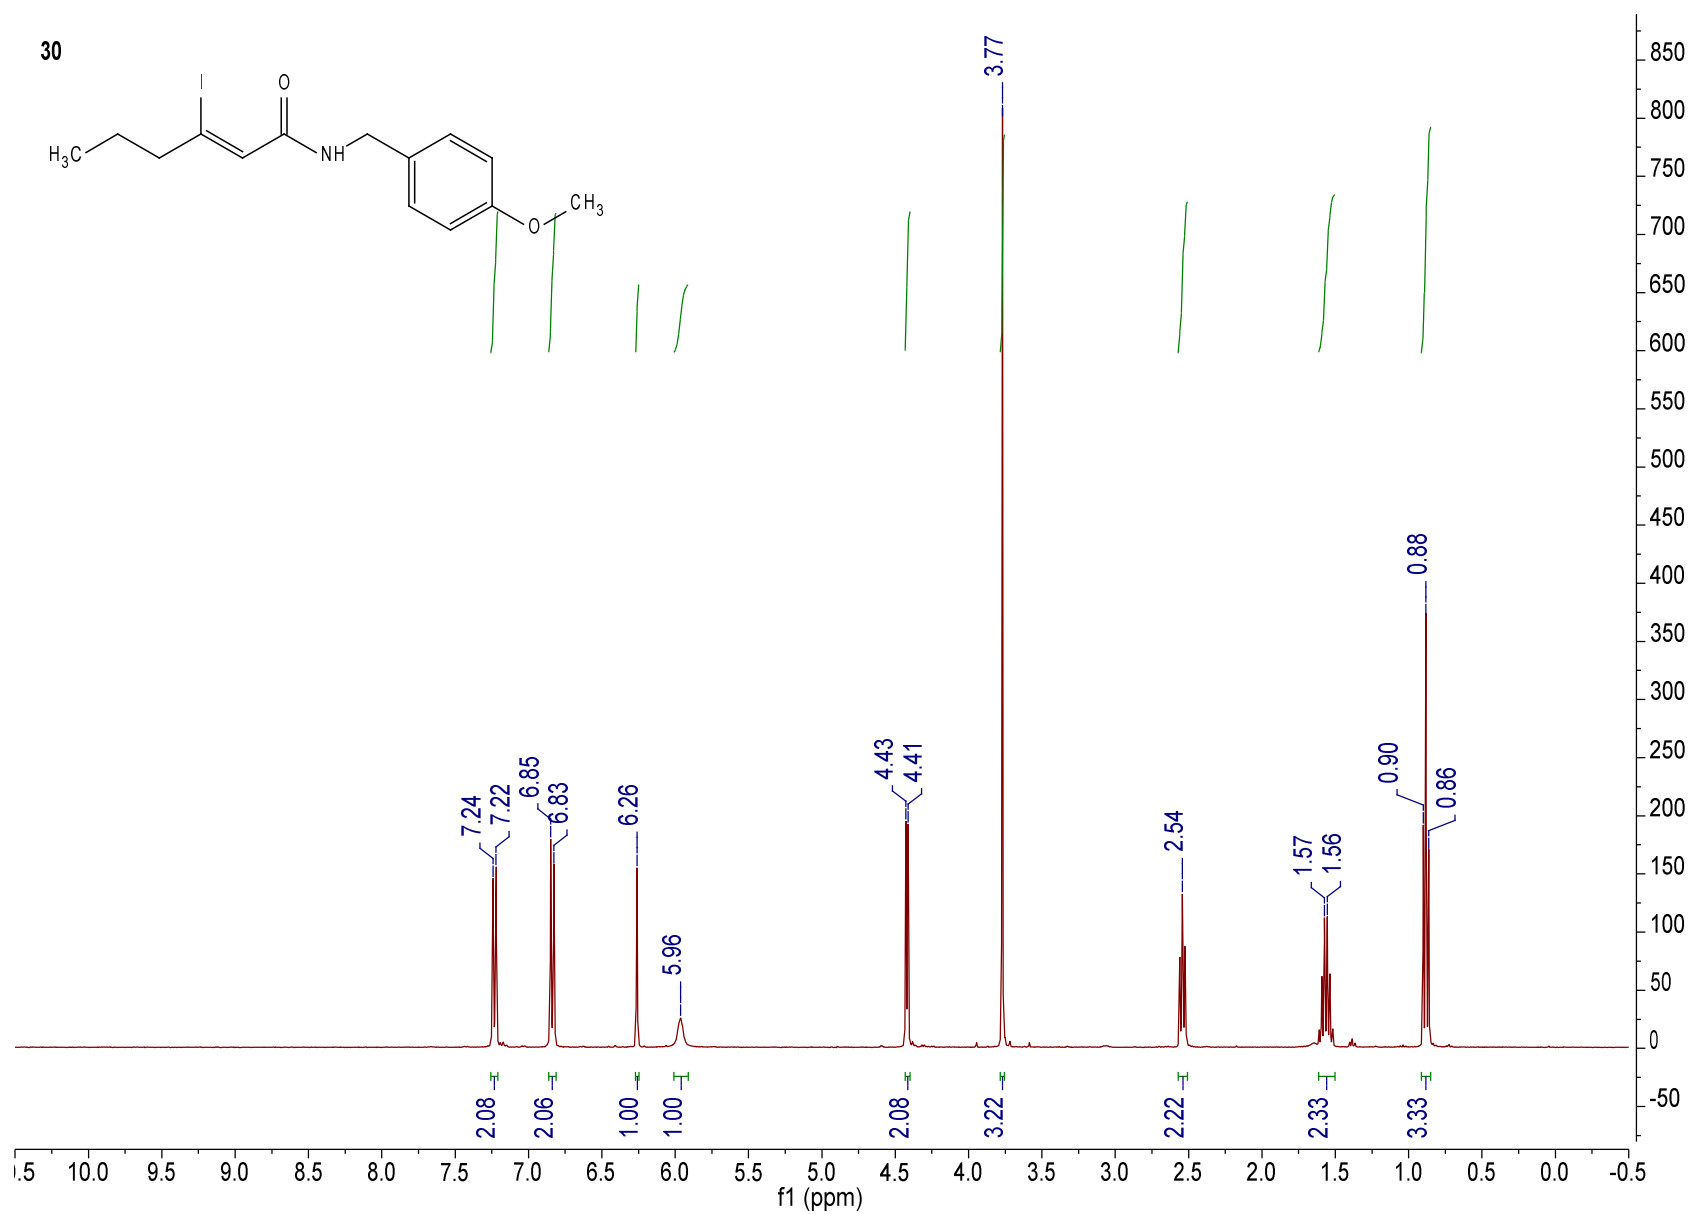

30

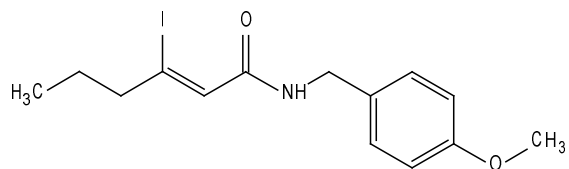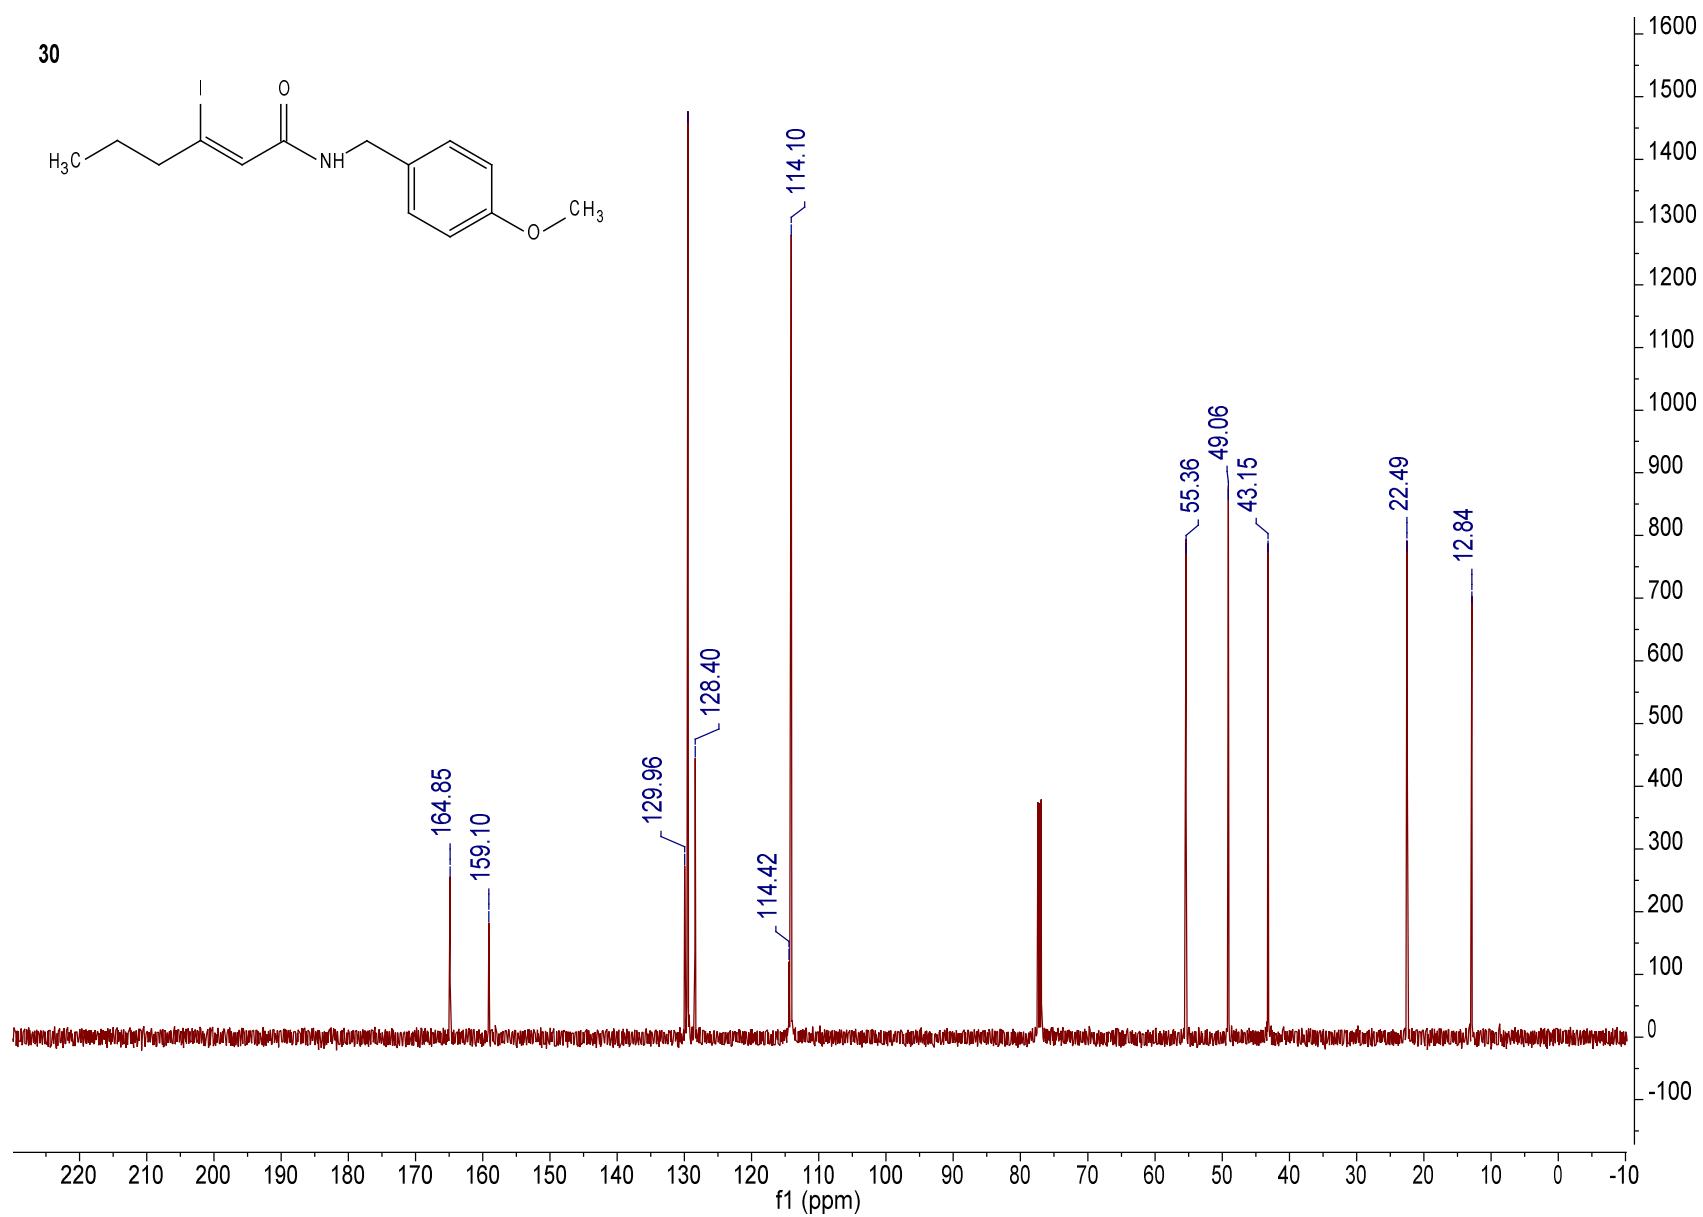



31

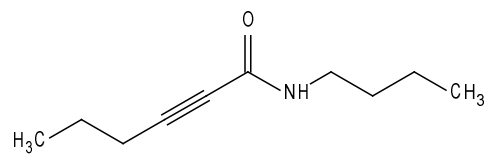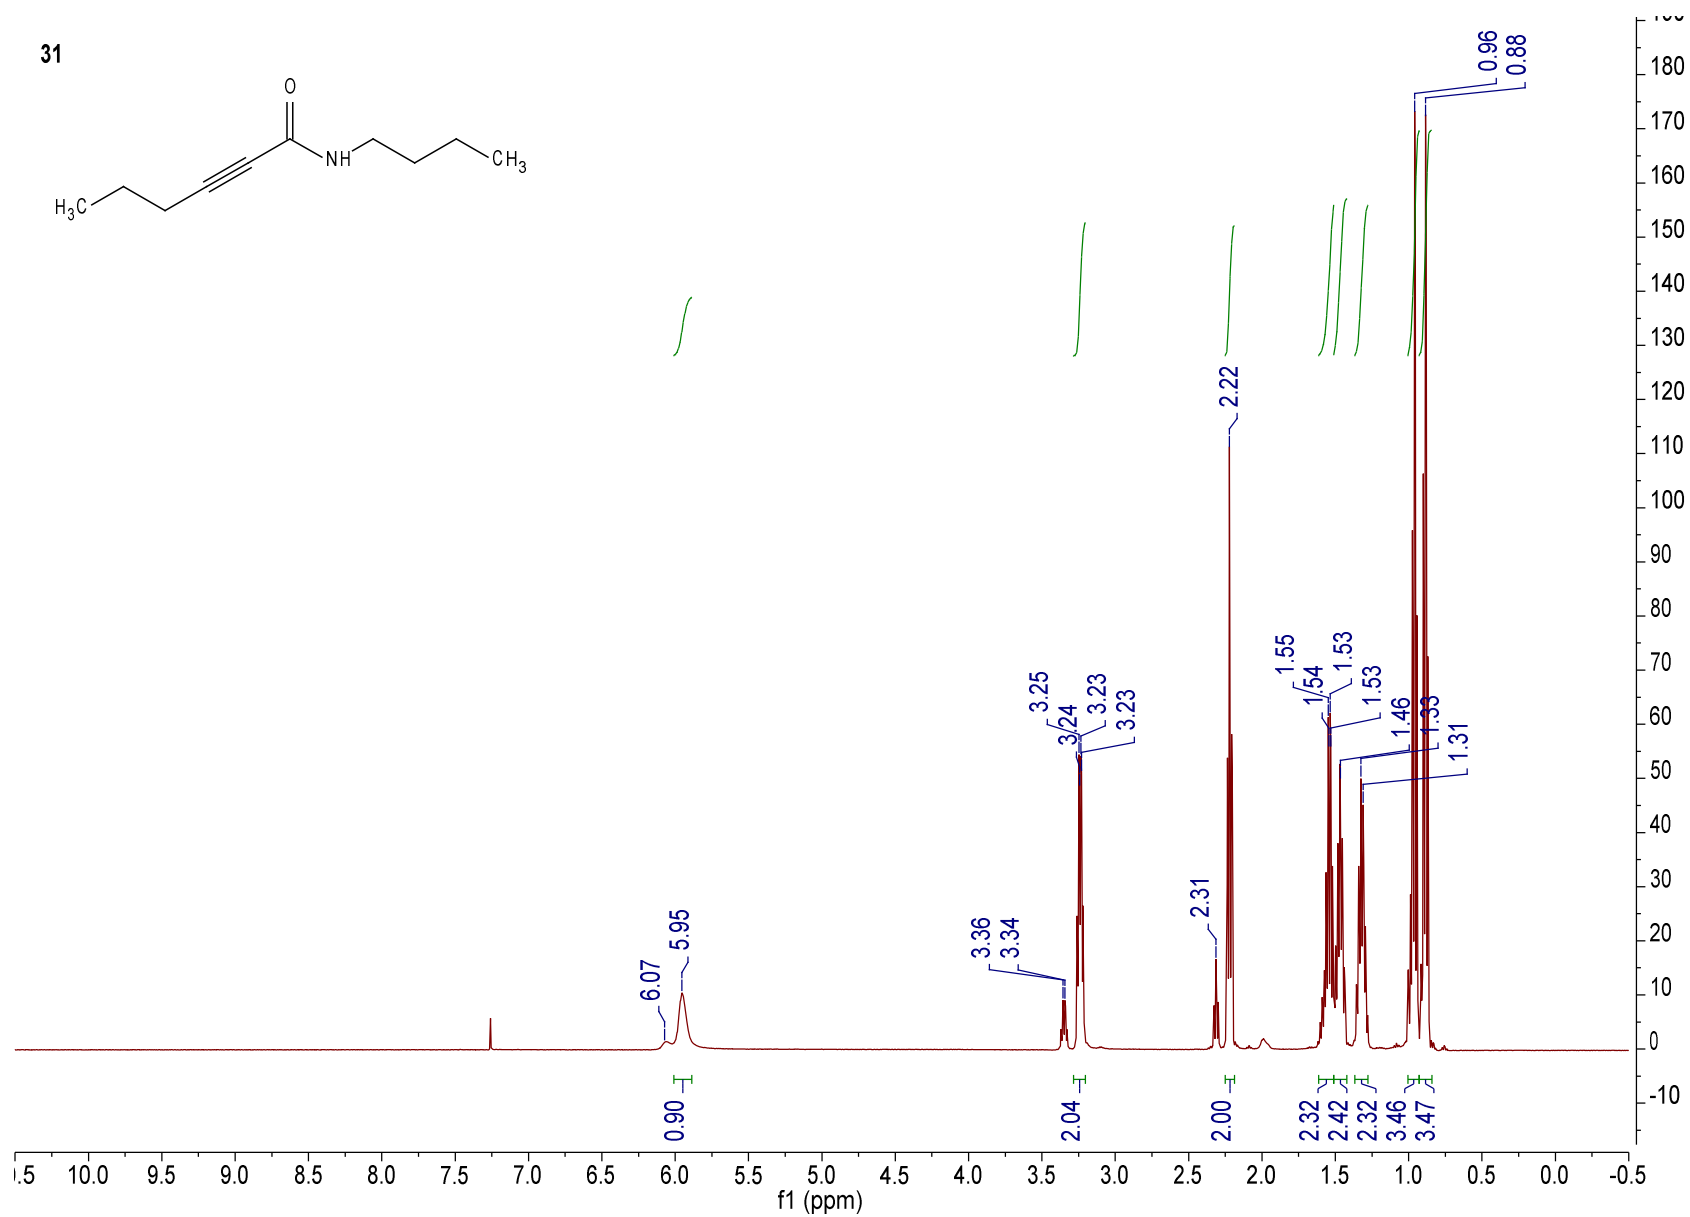

31

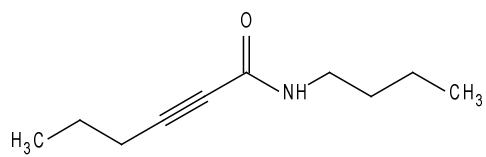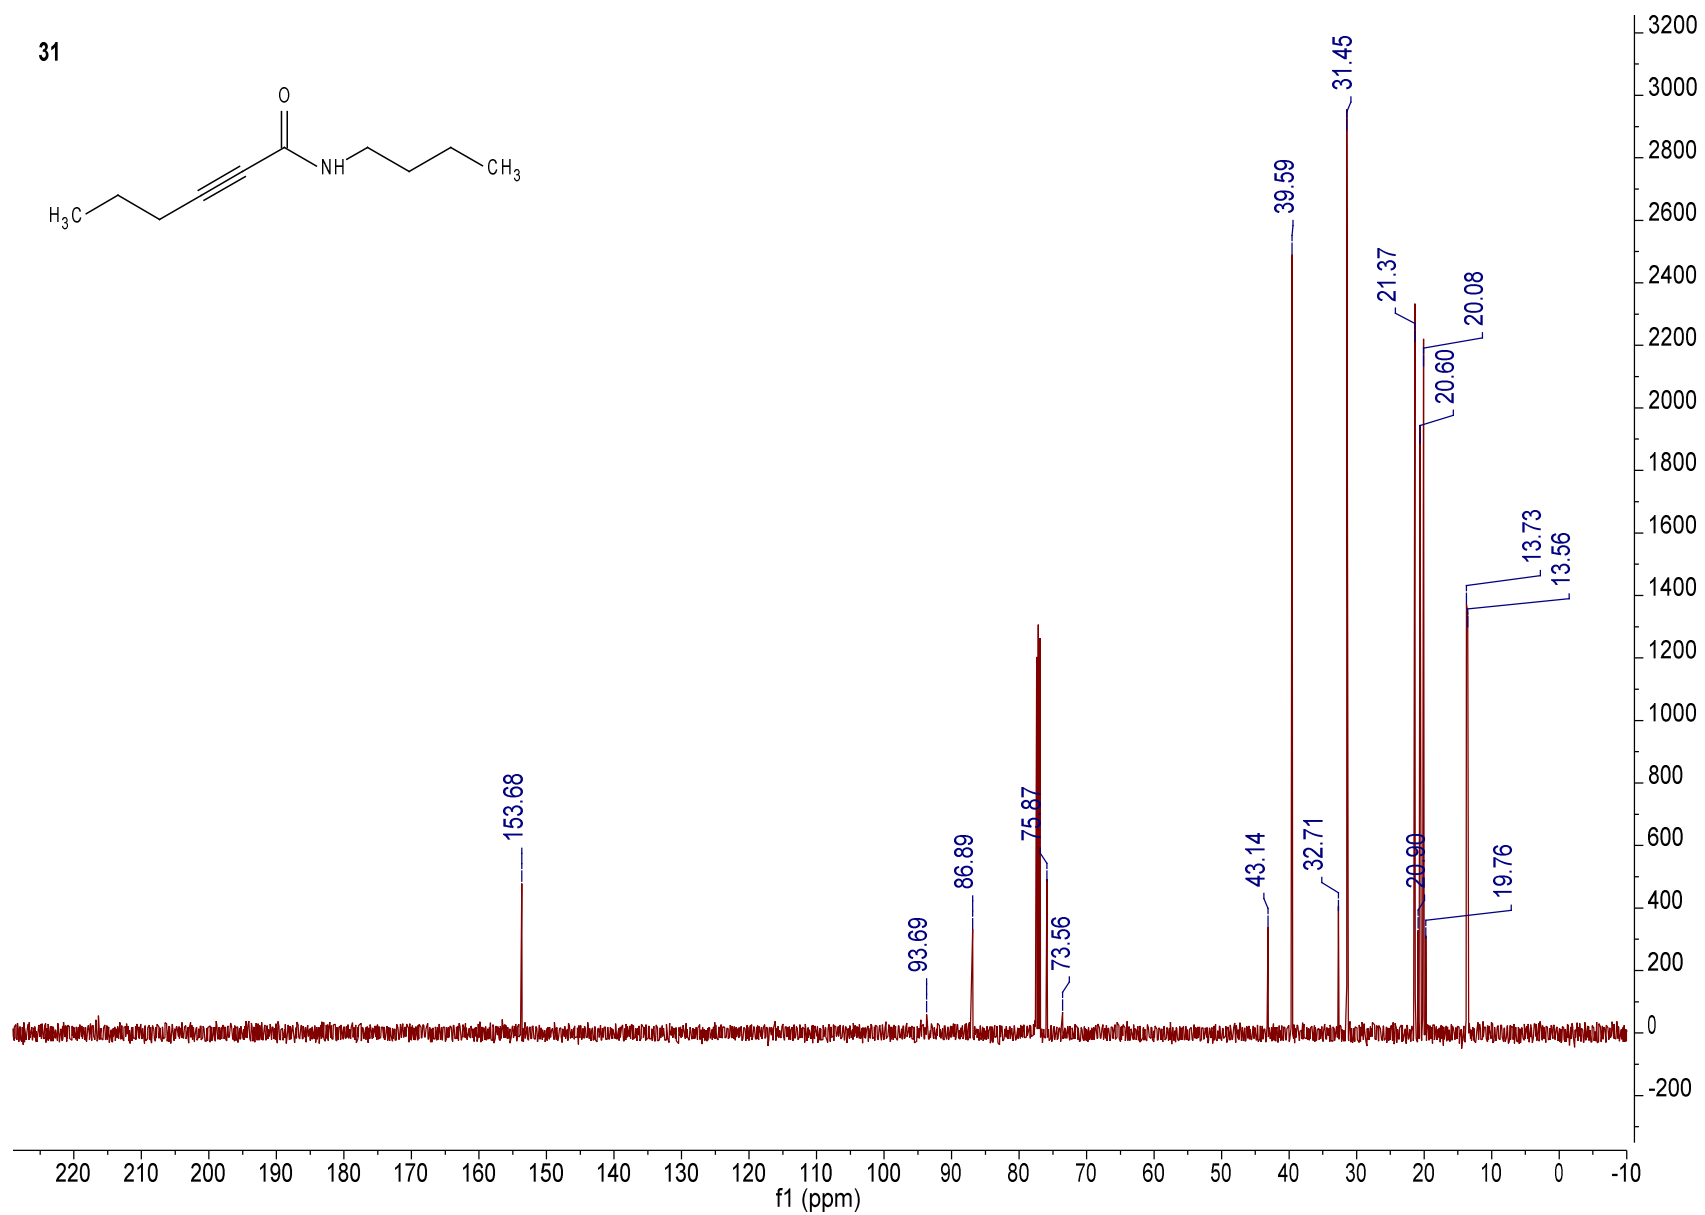

32

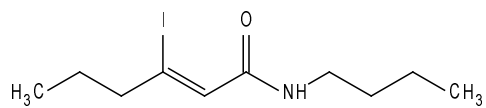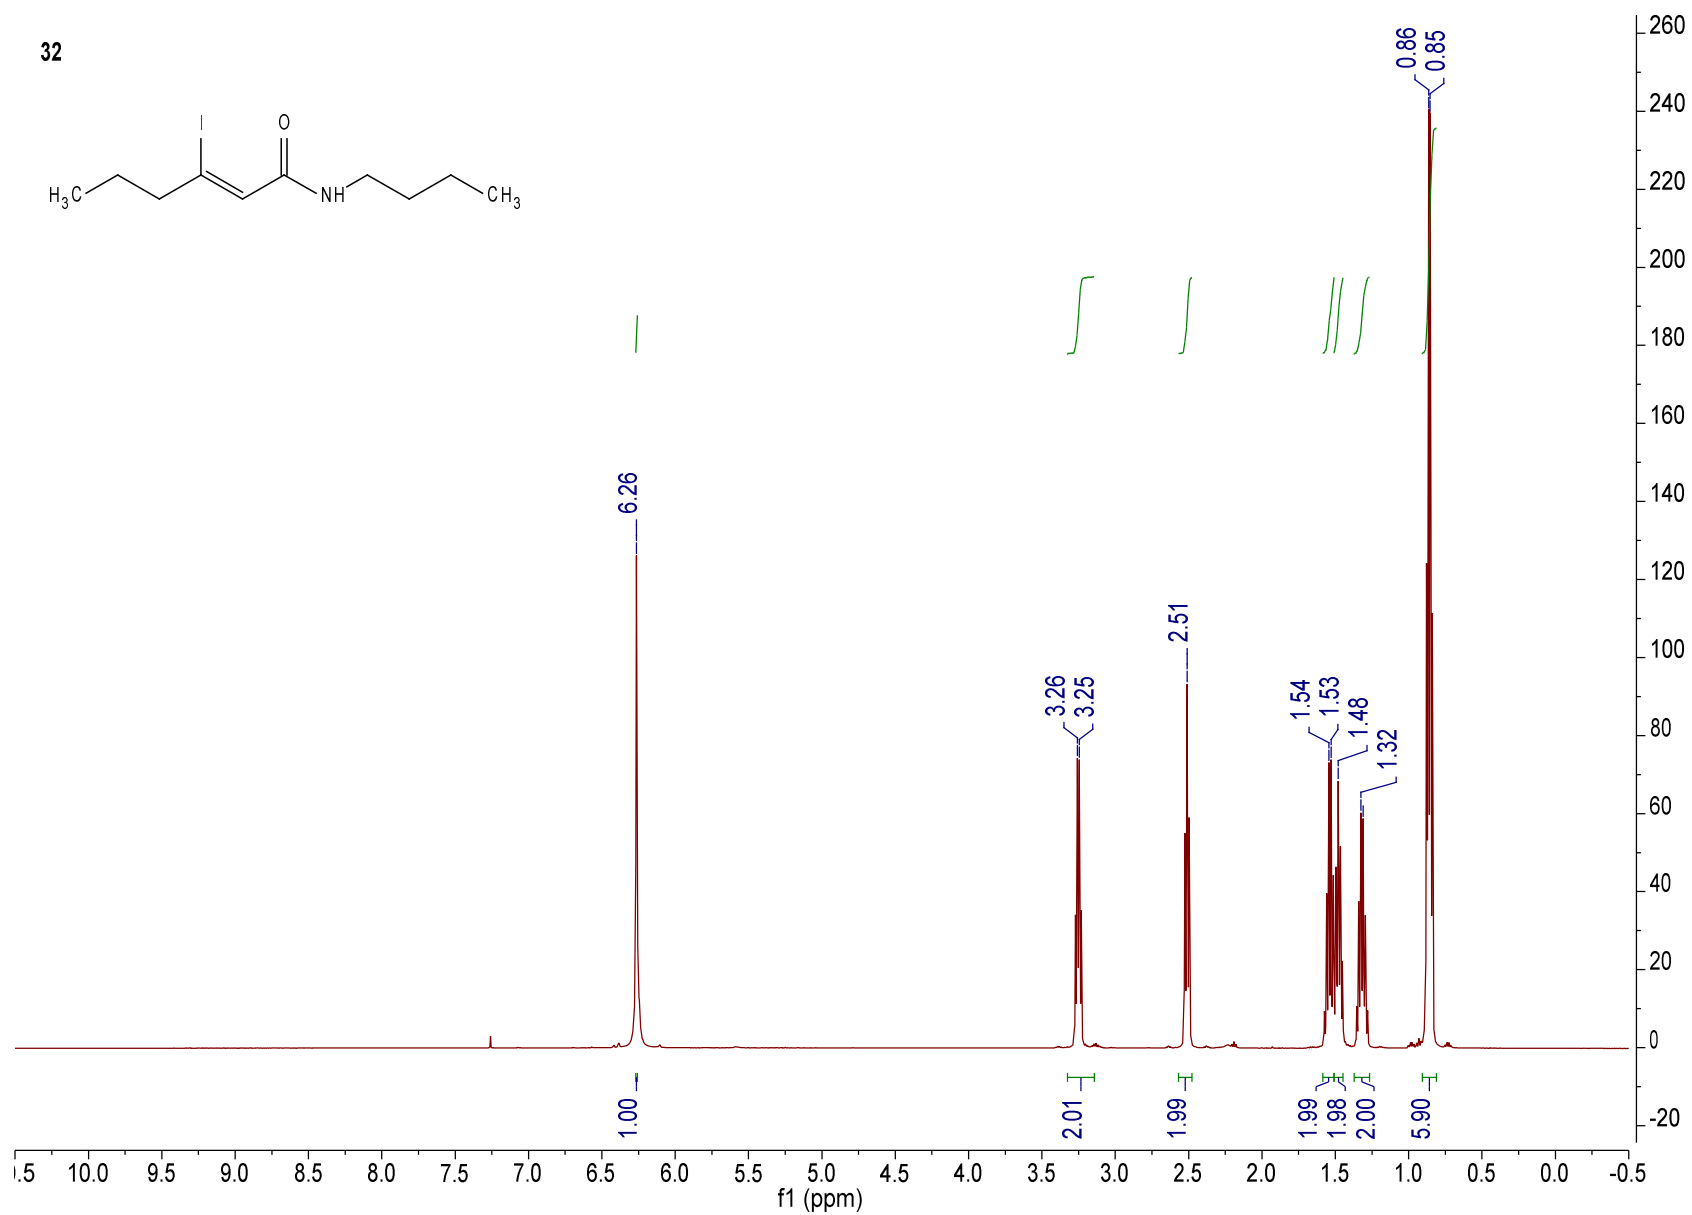

32

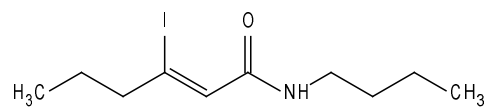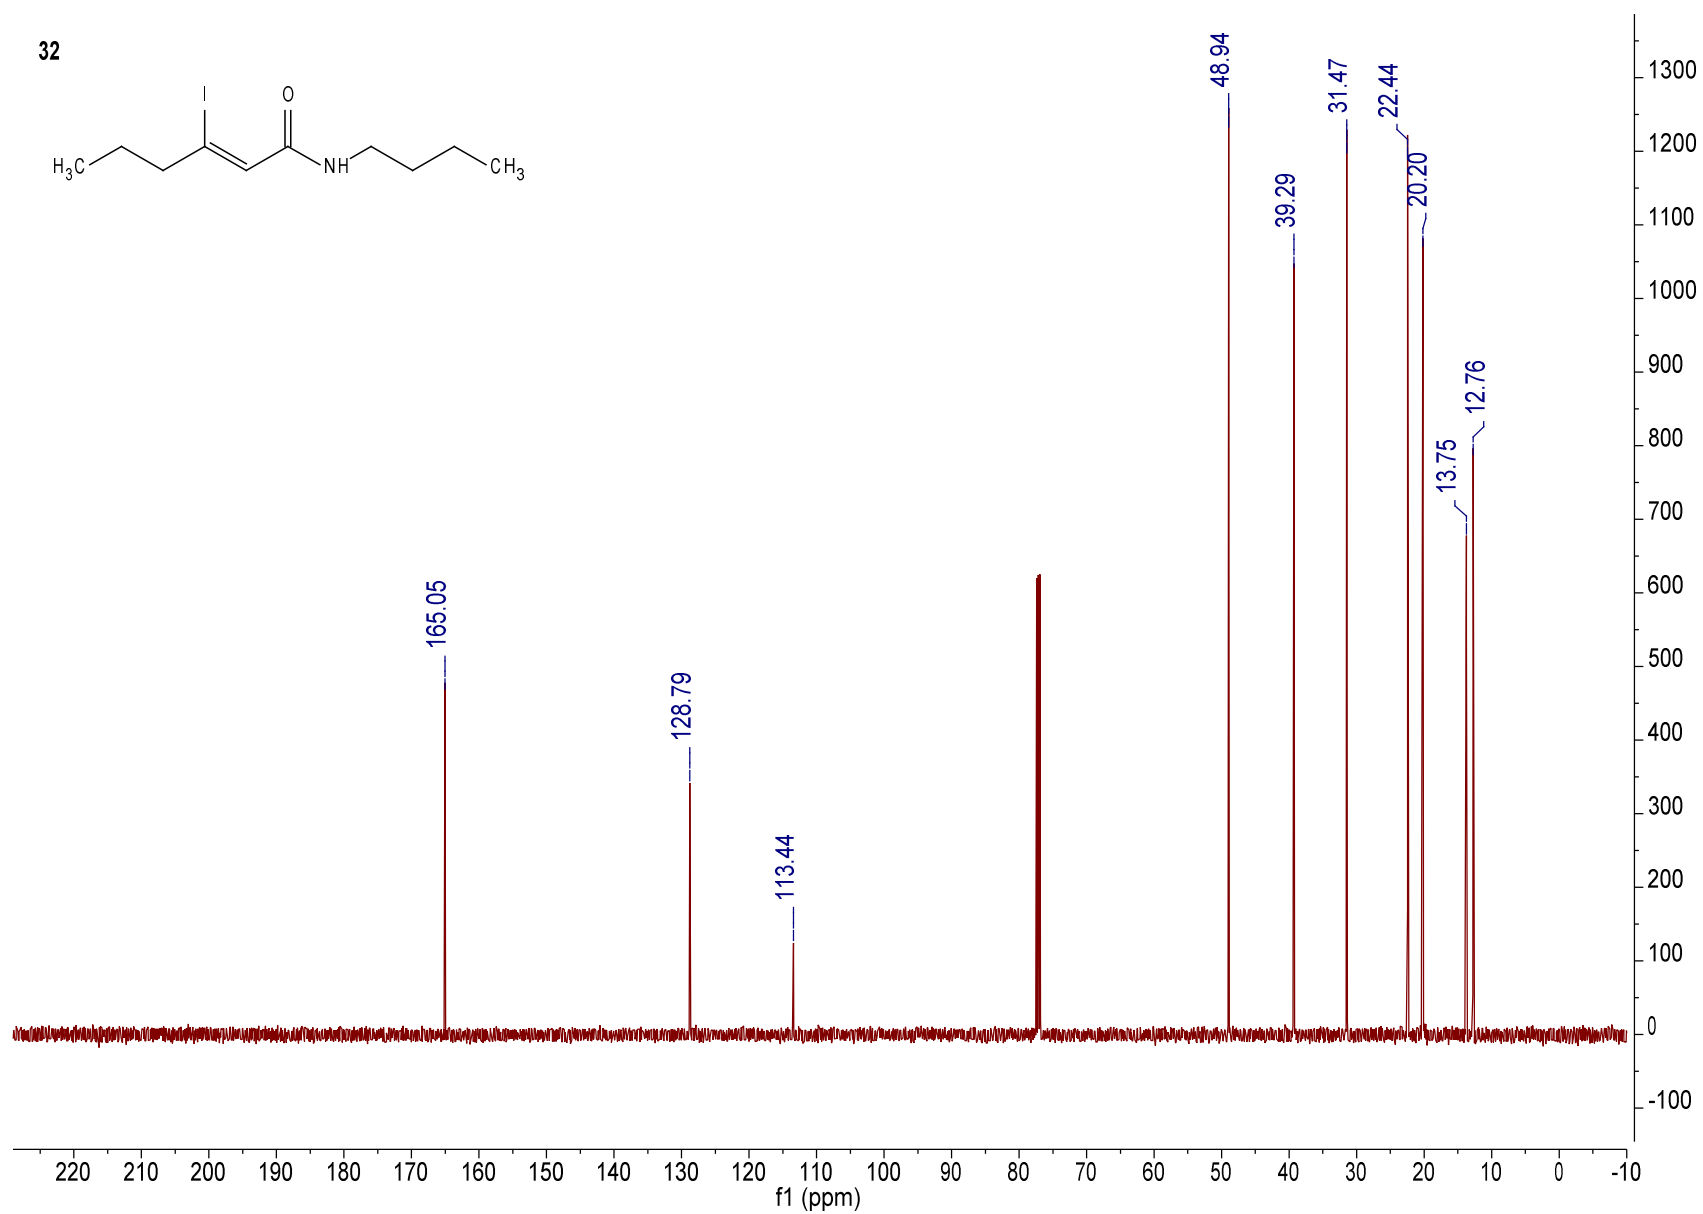

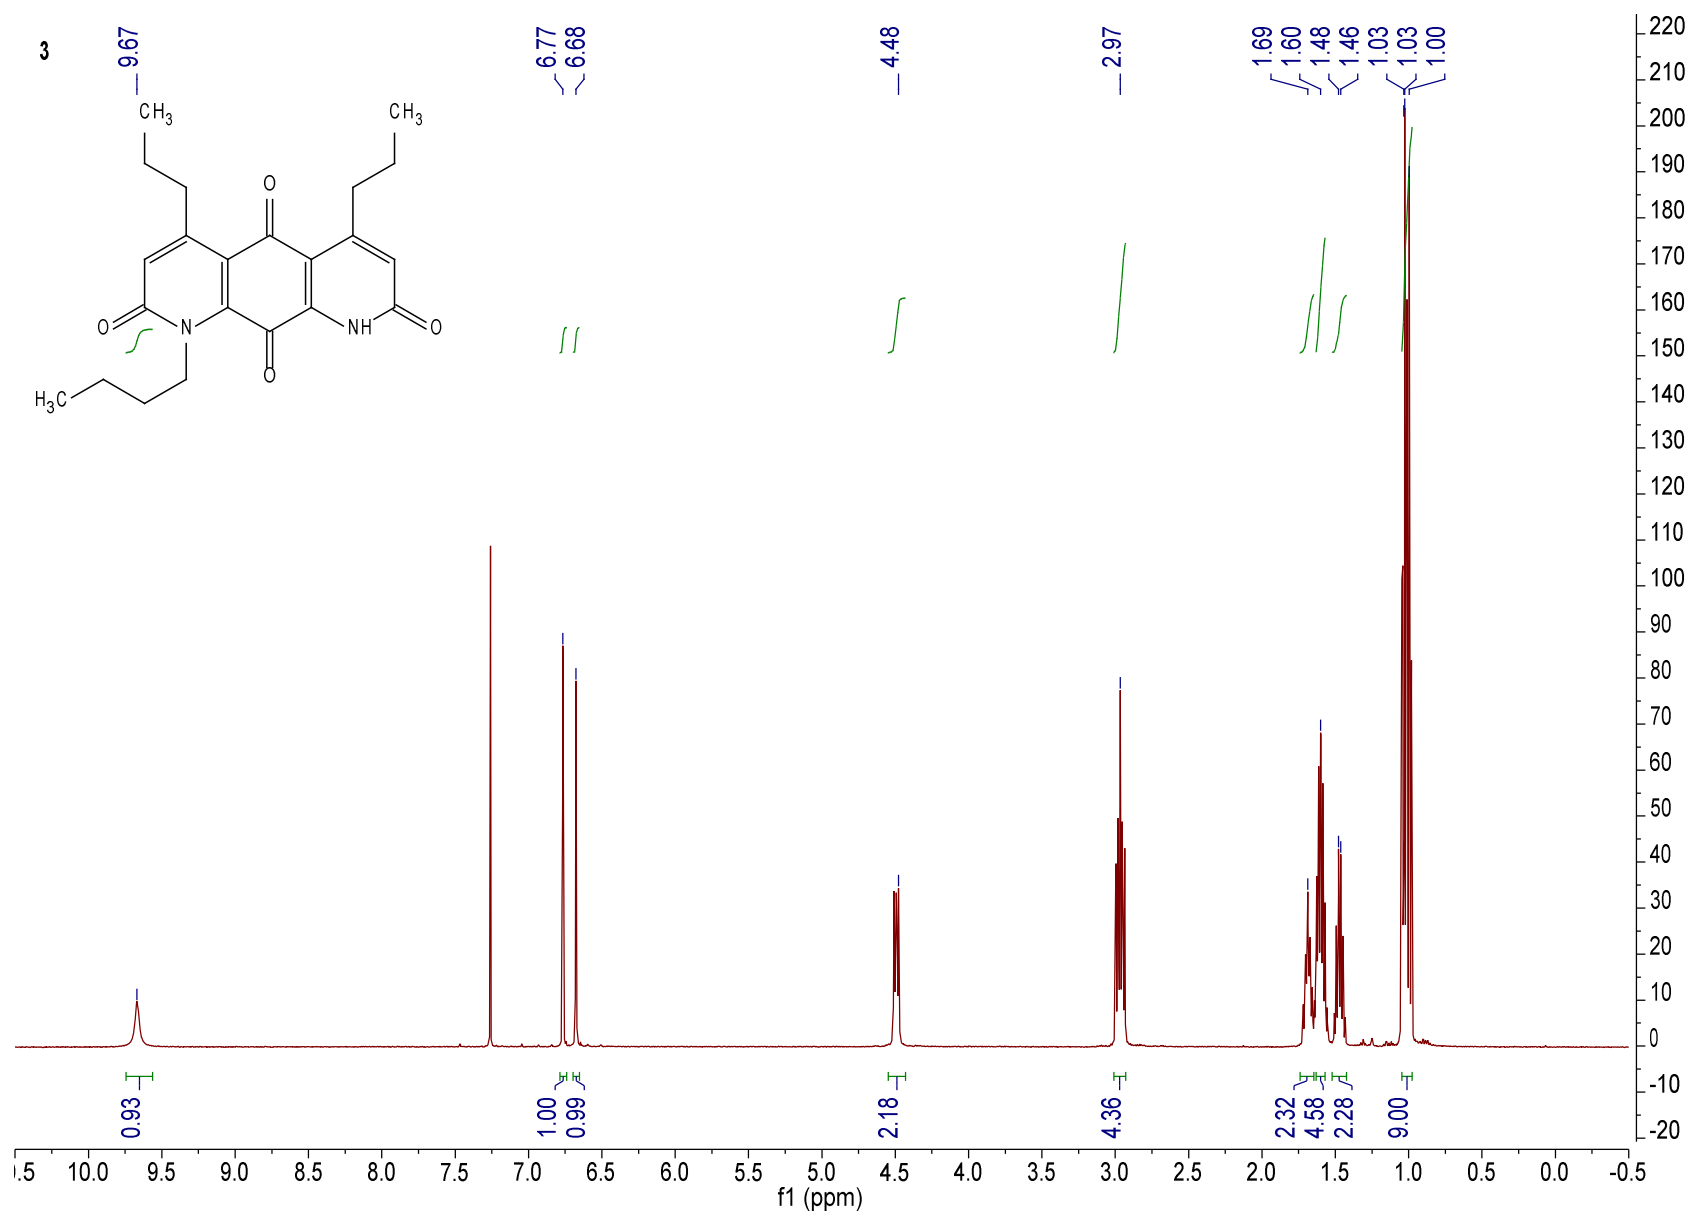

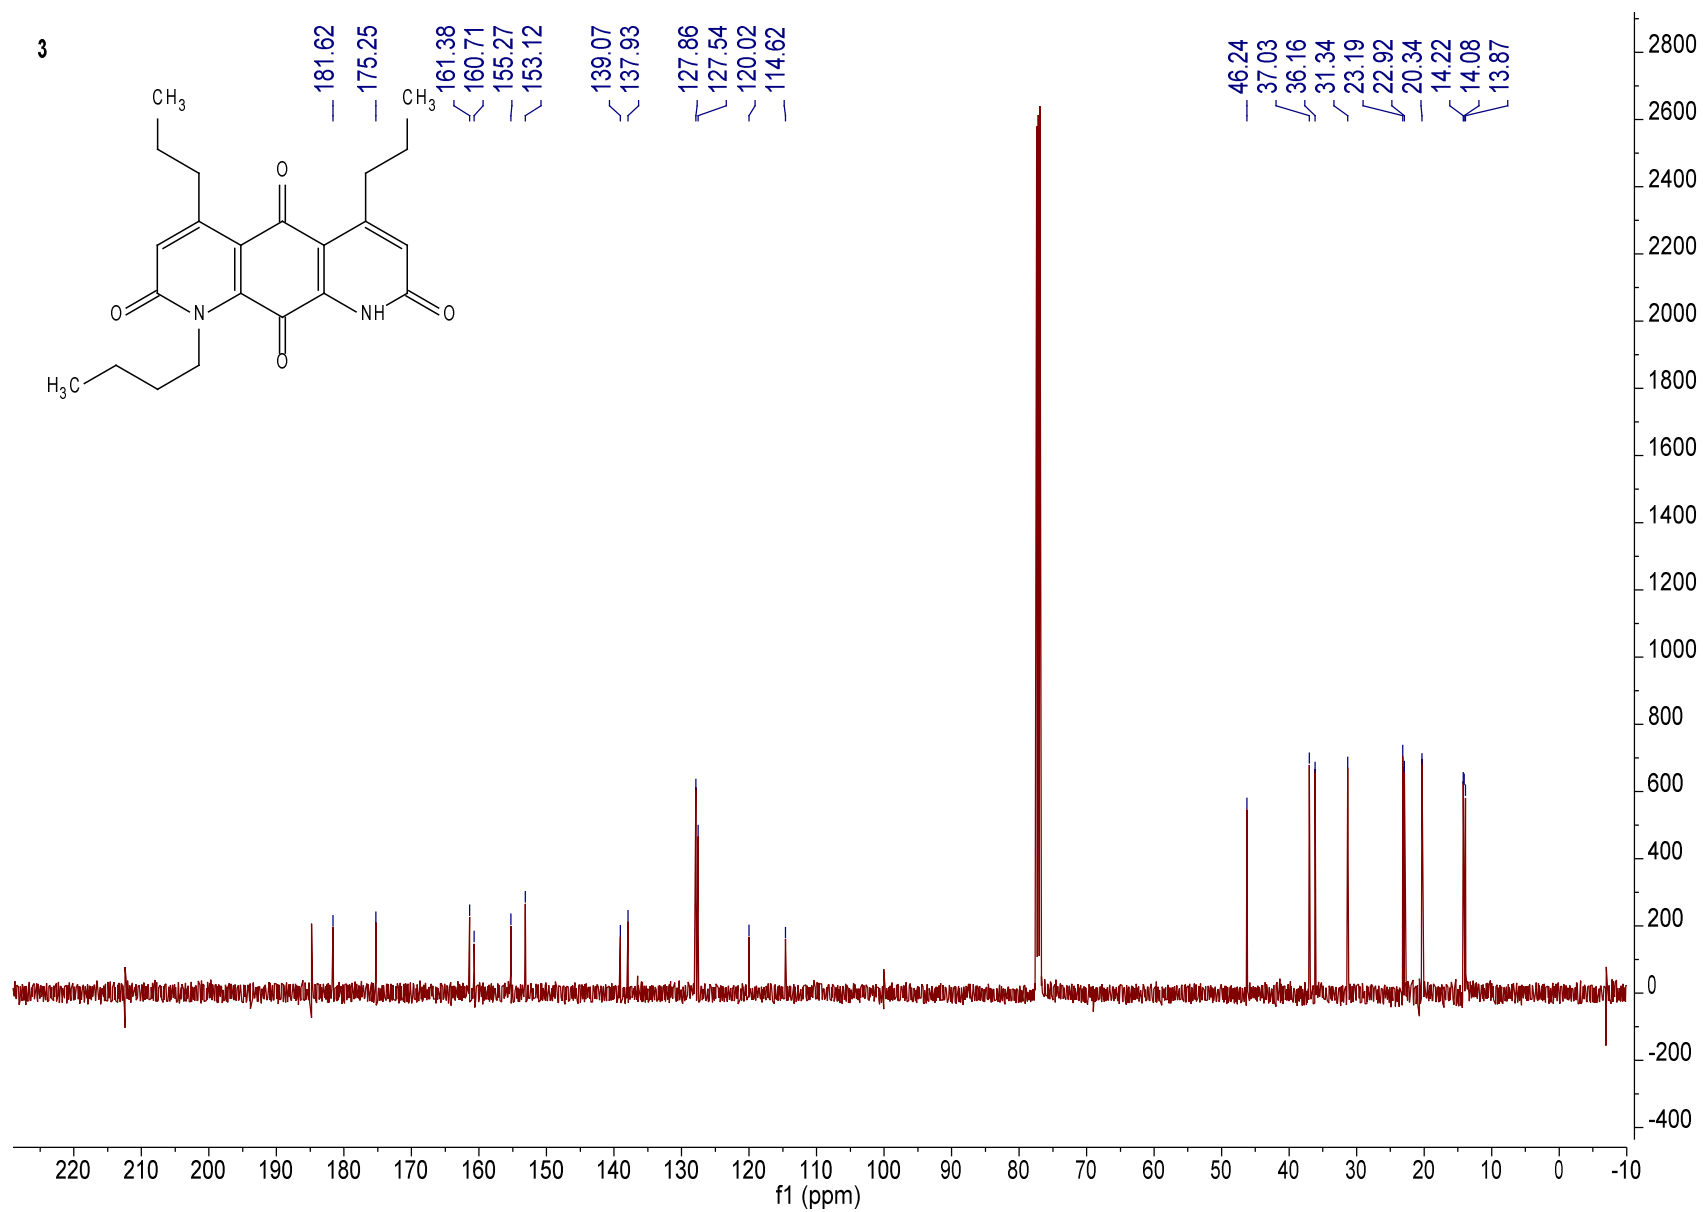

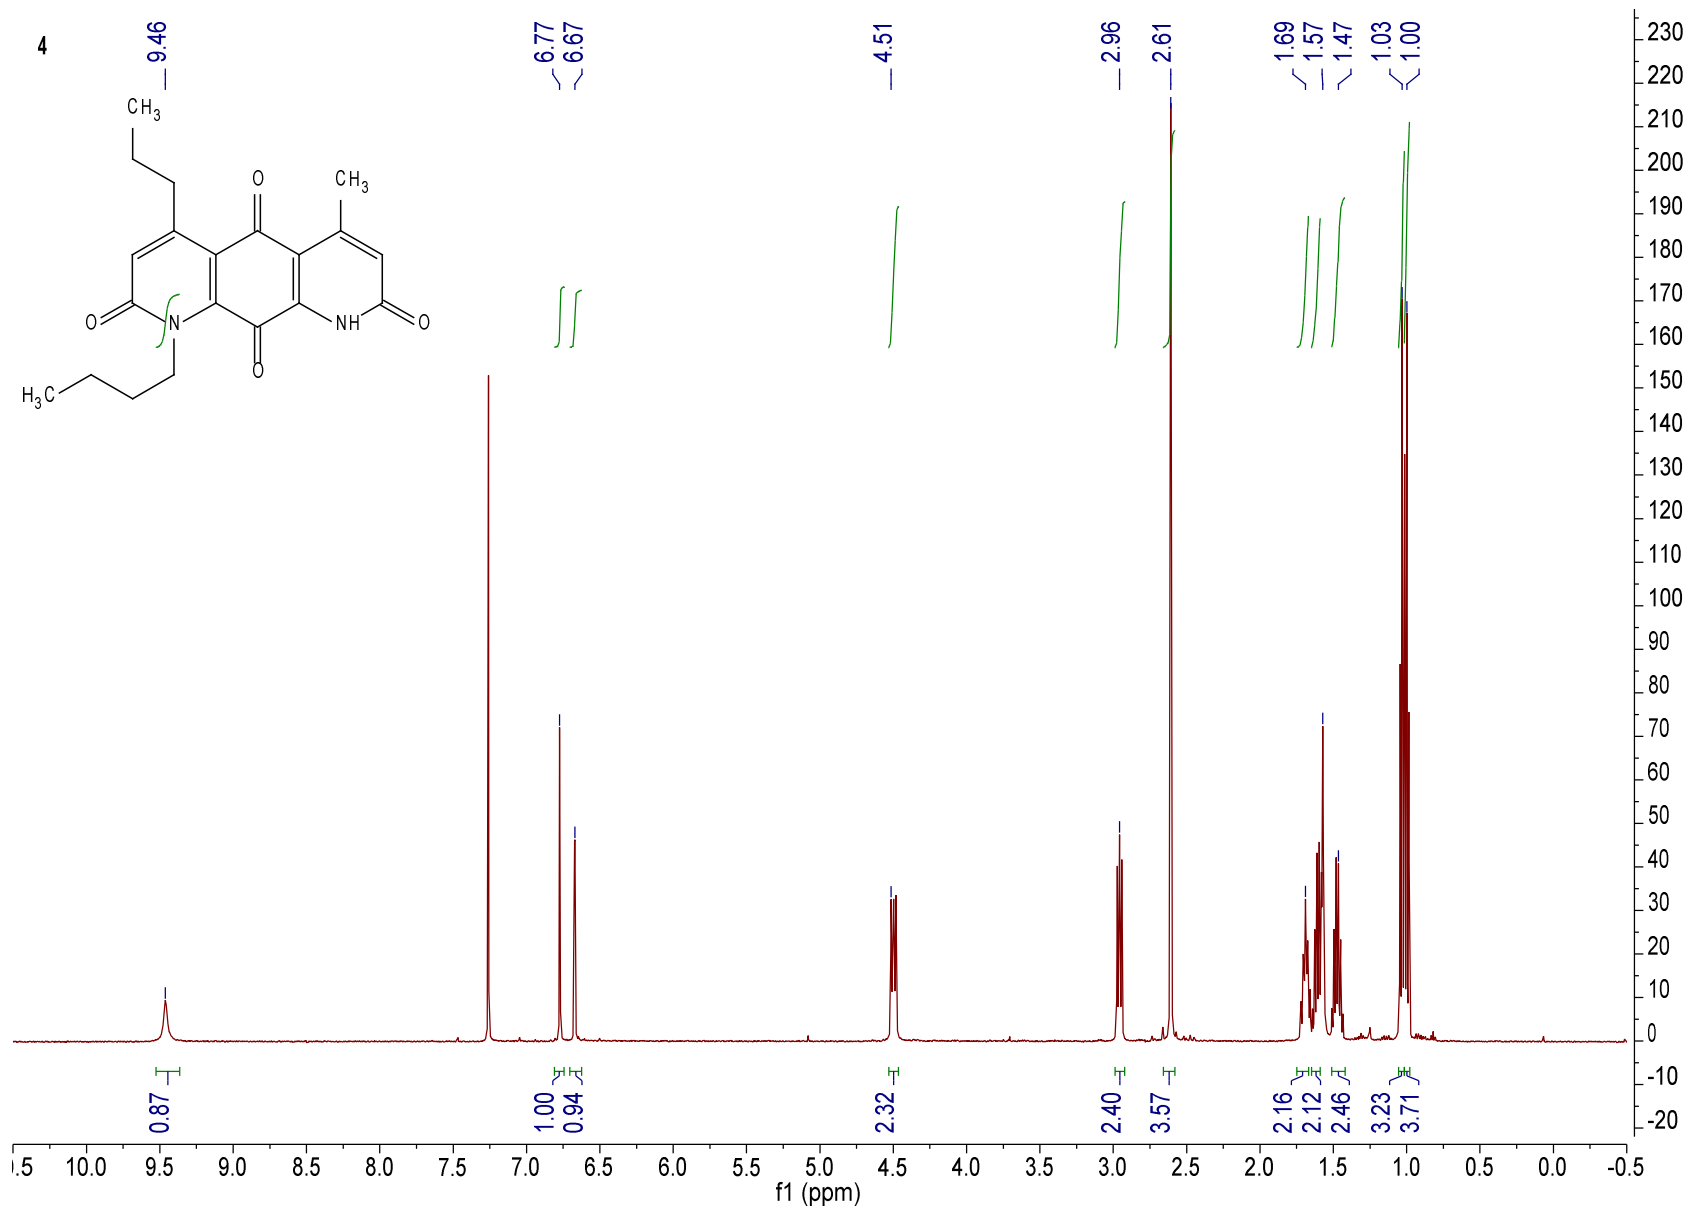

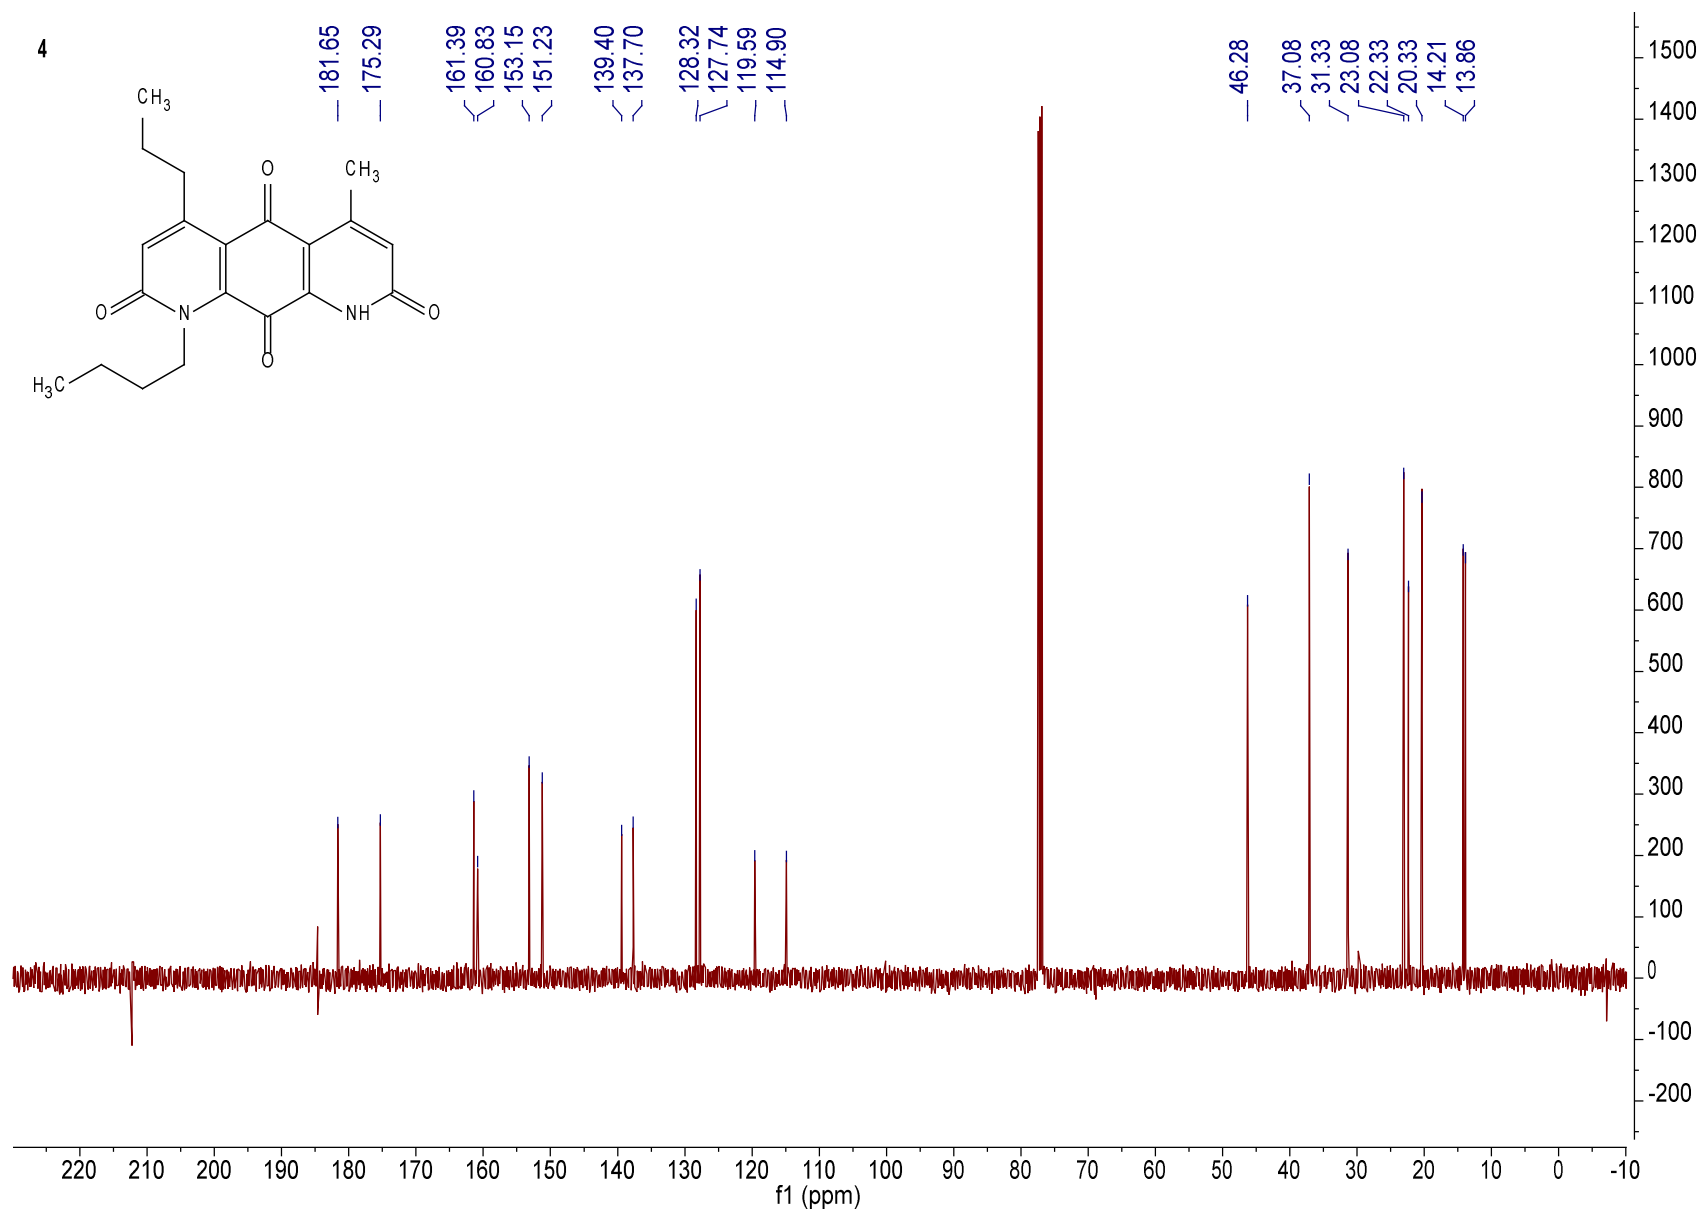



33

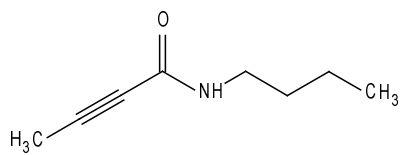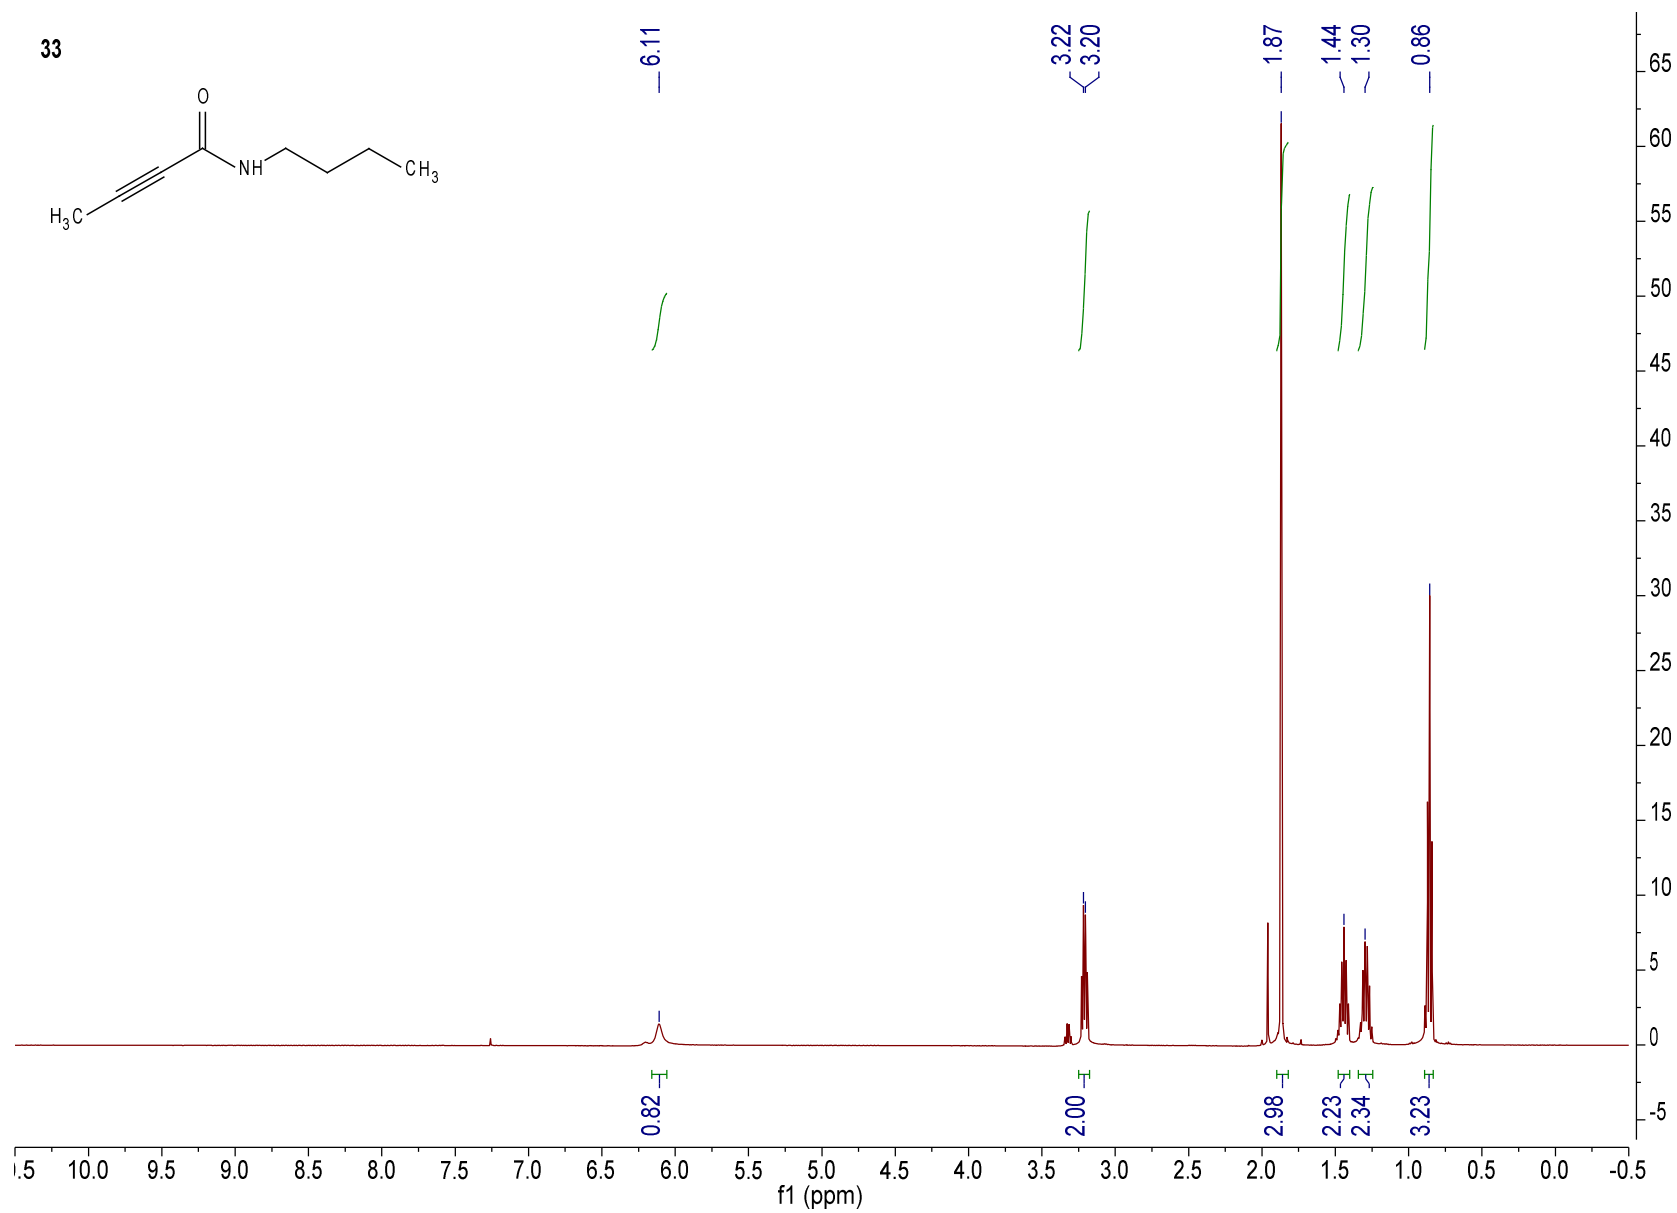

33

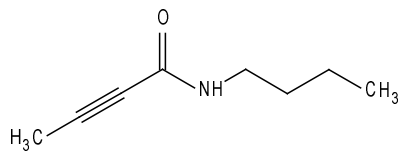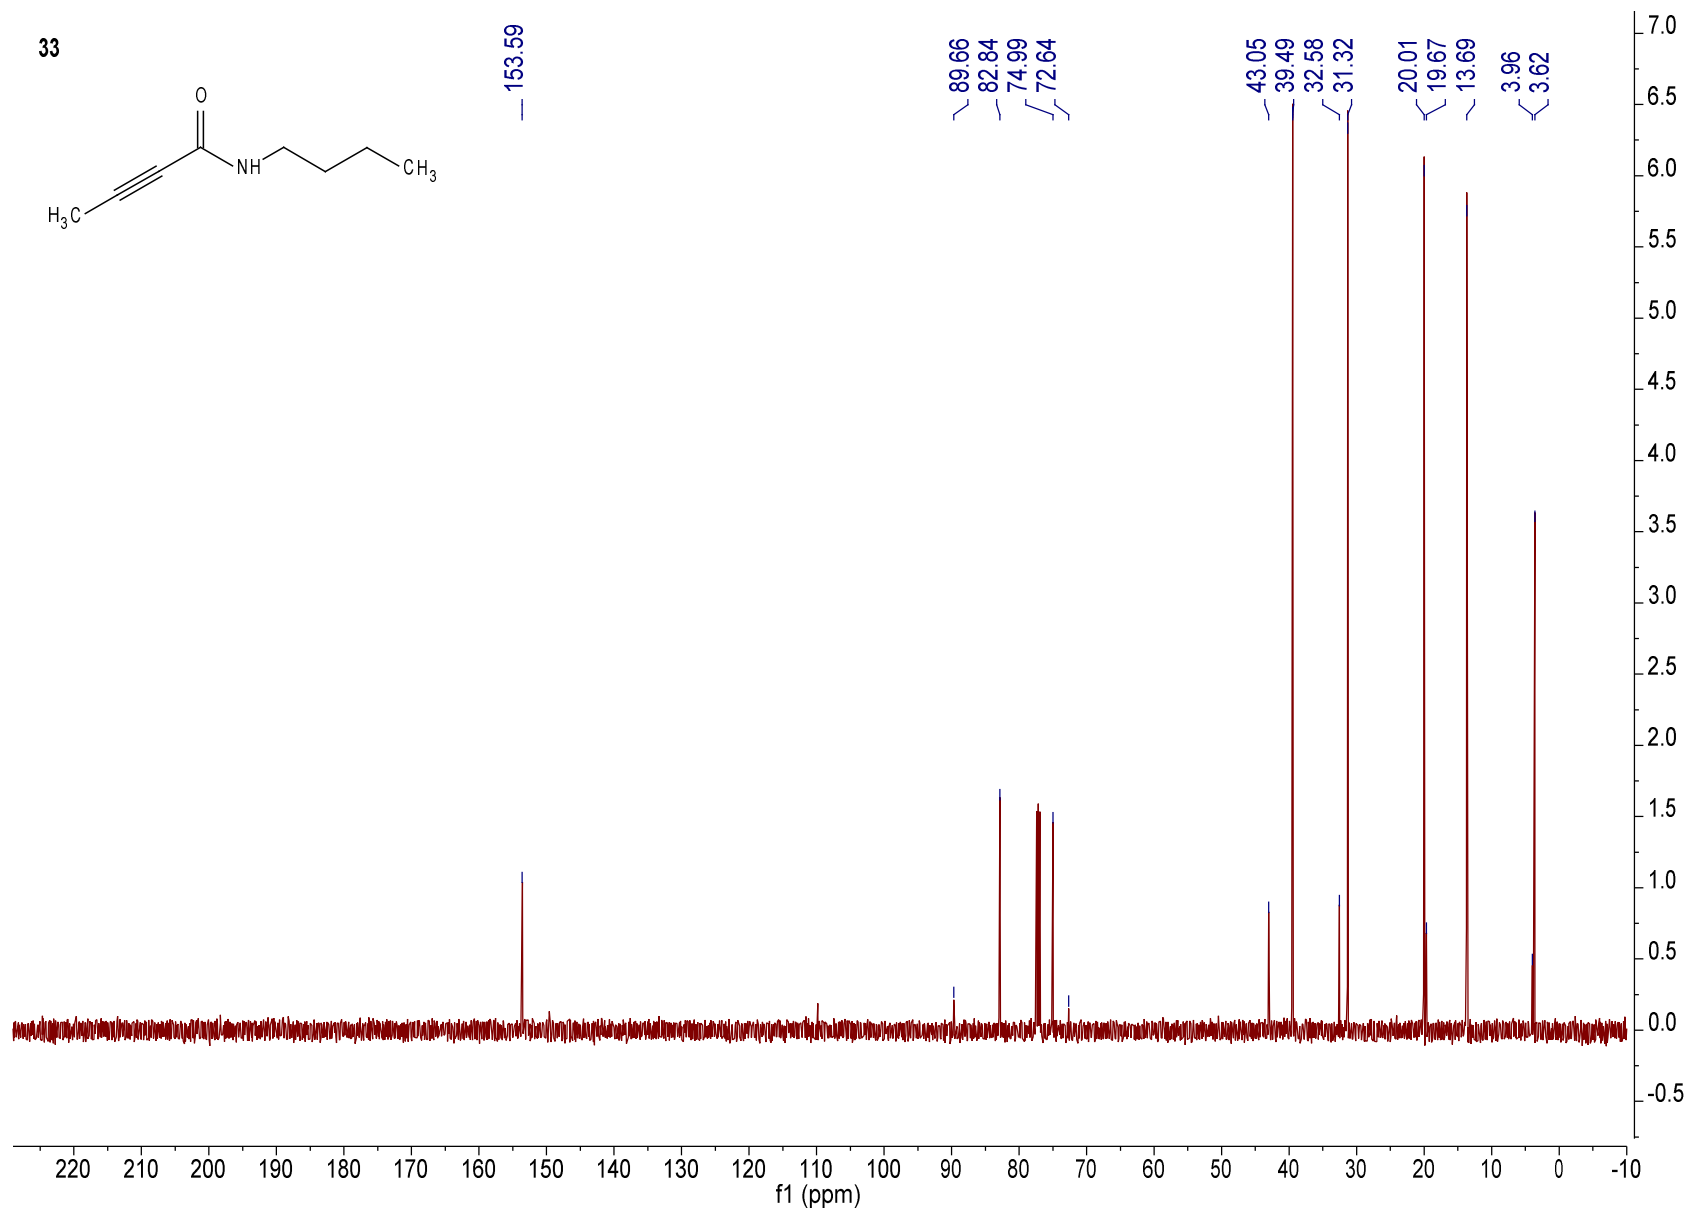

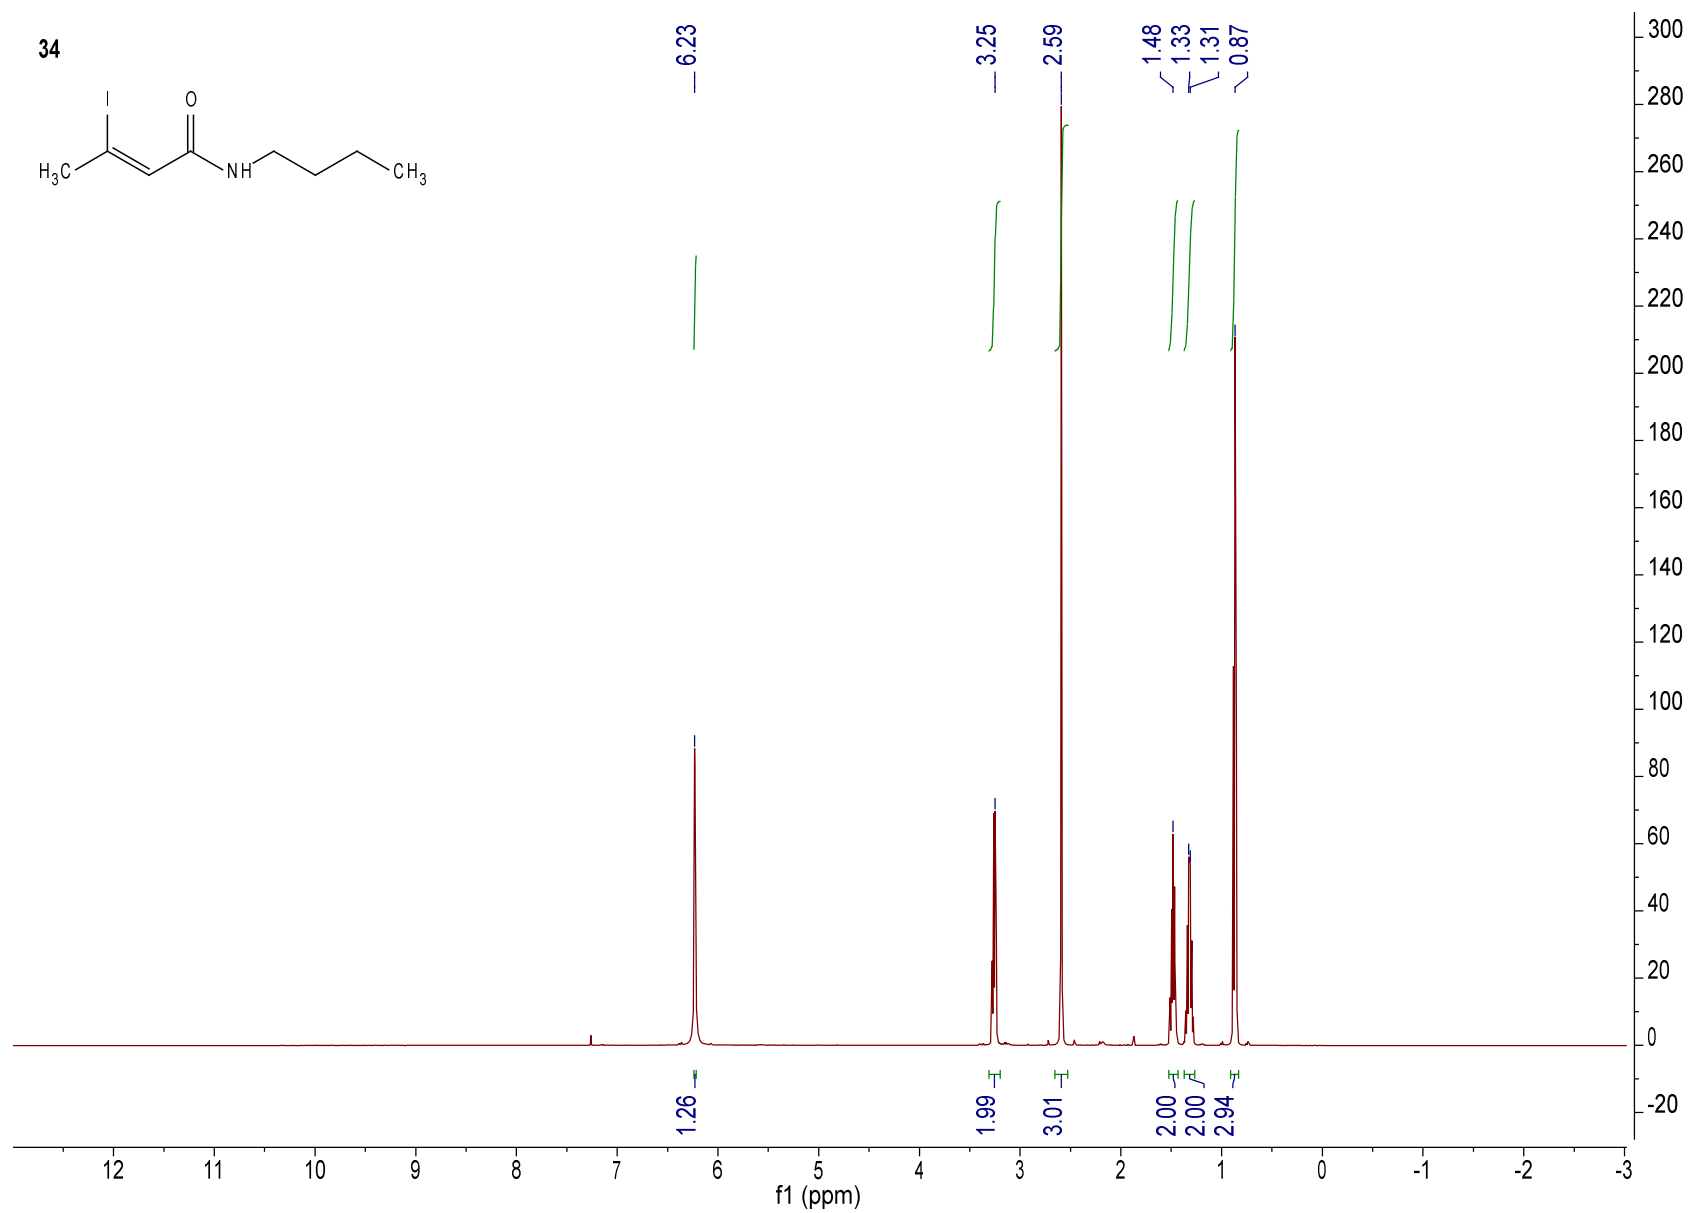

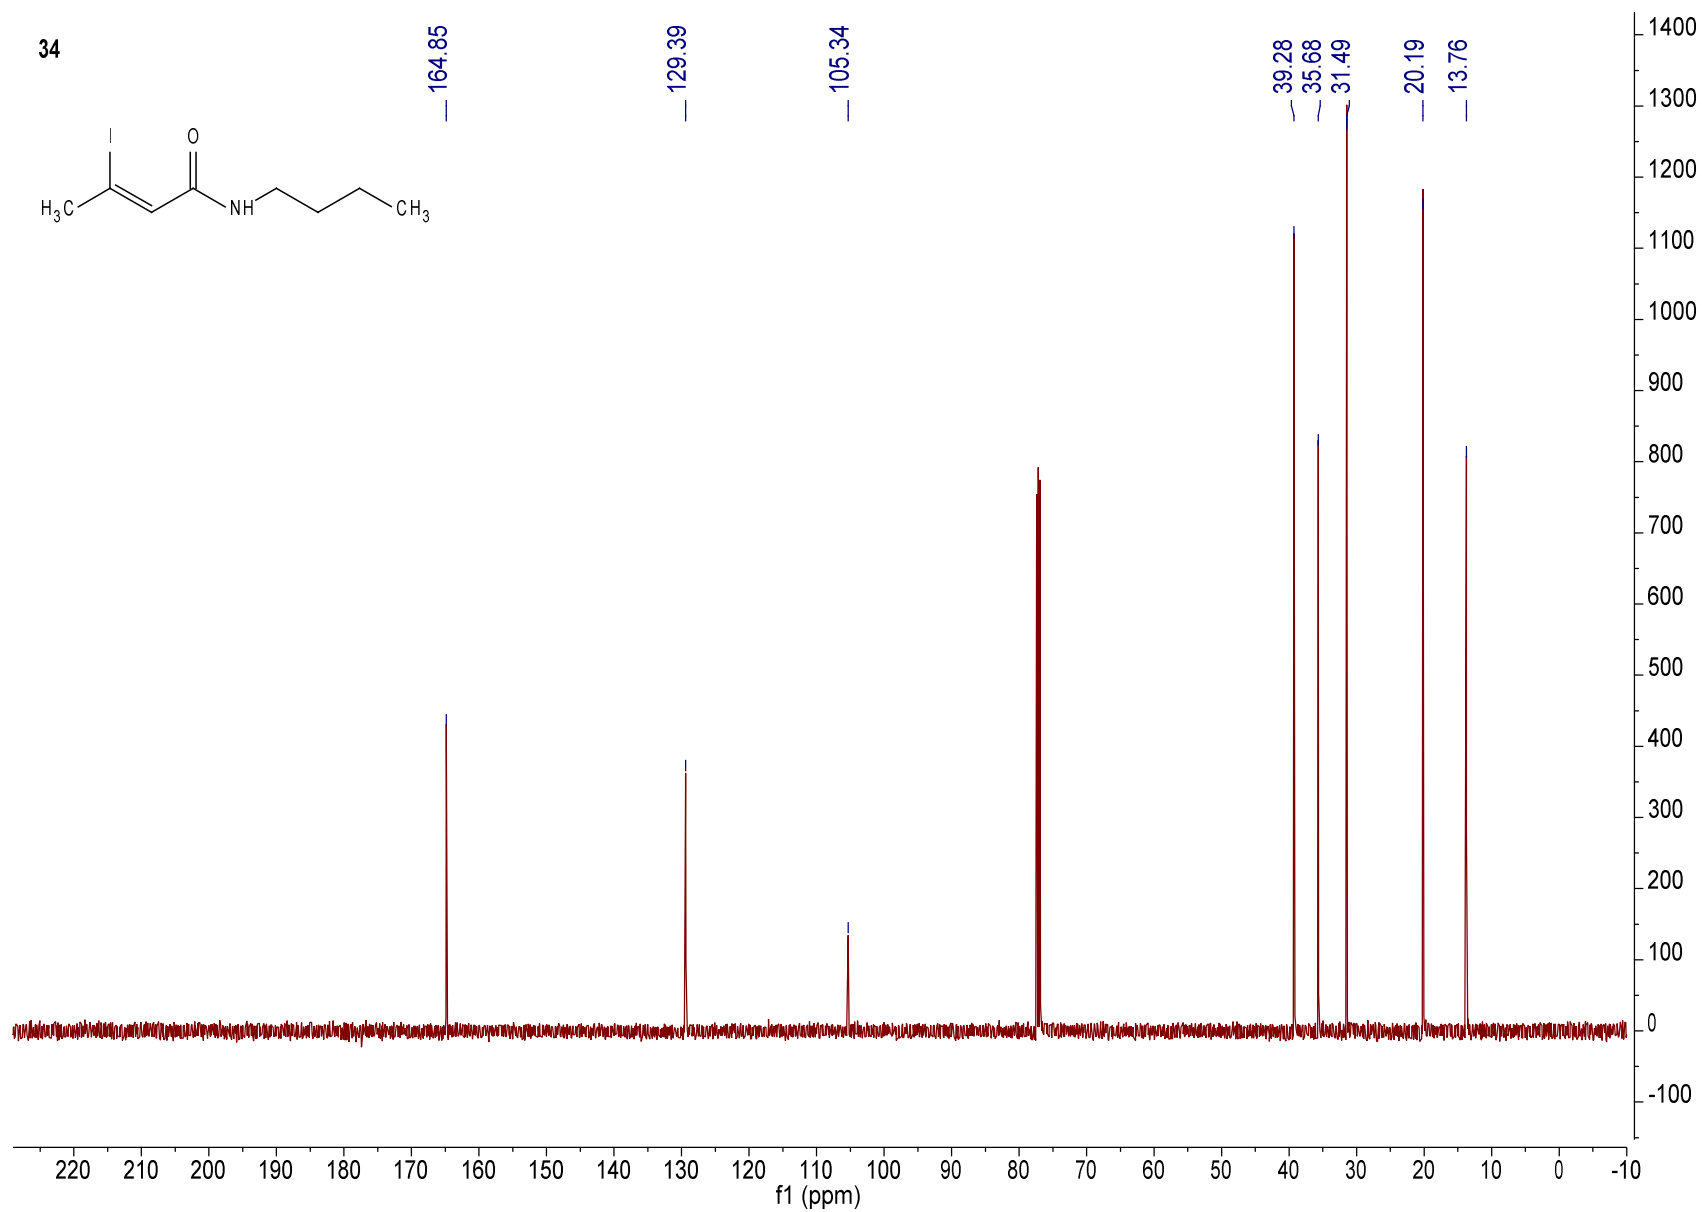

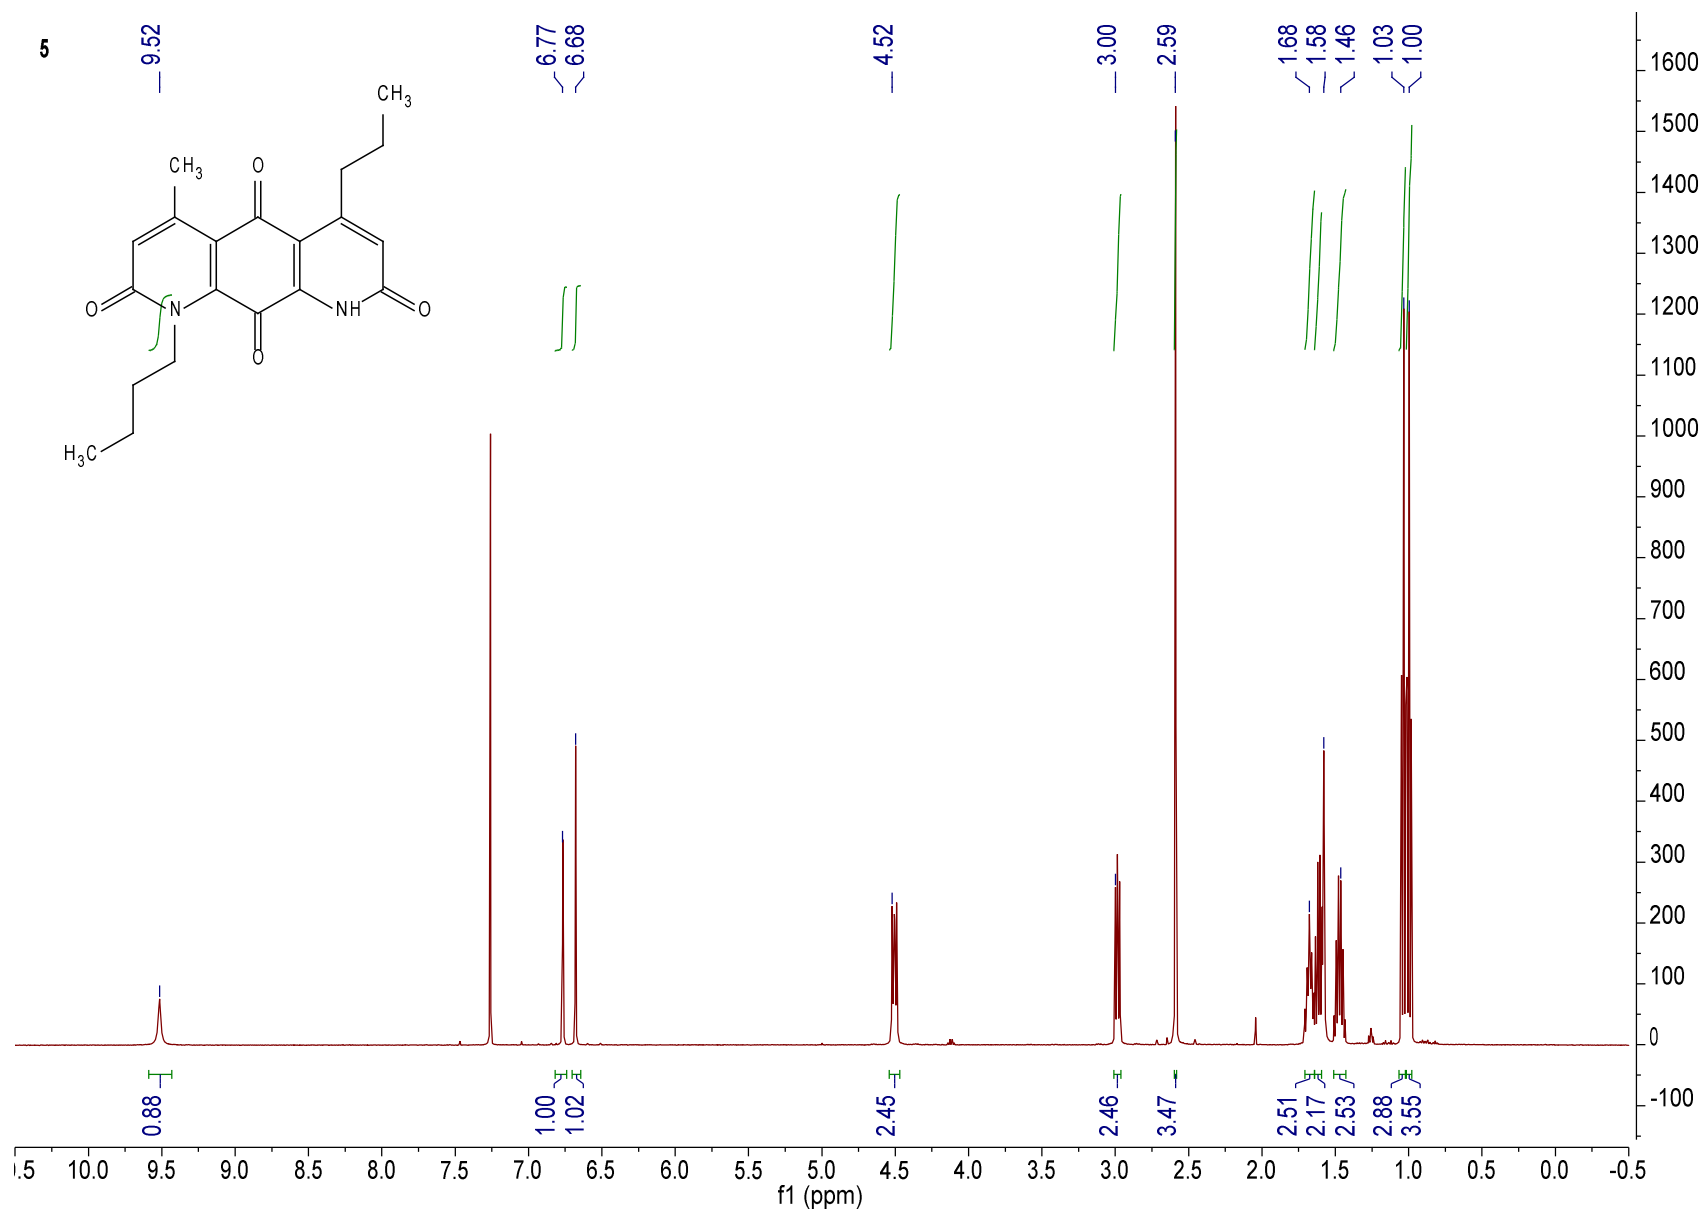

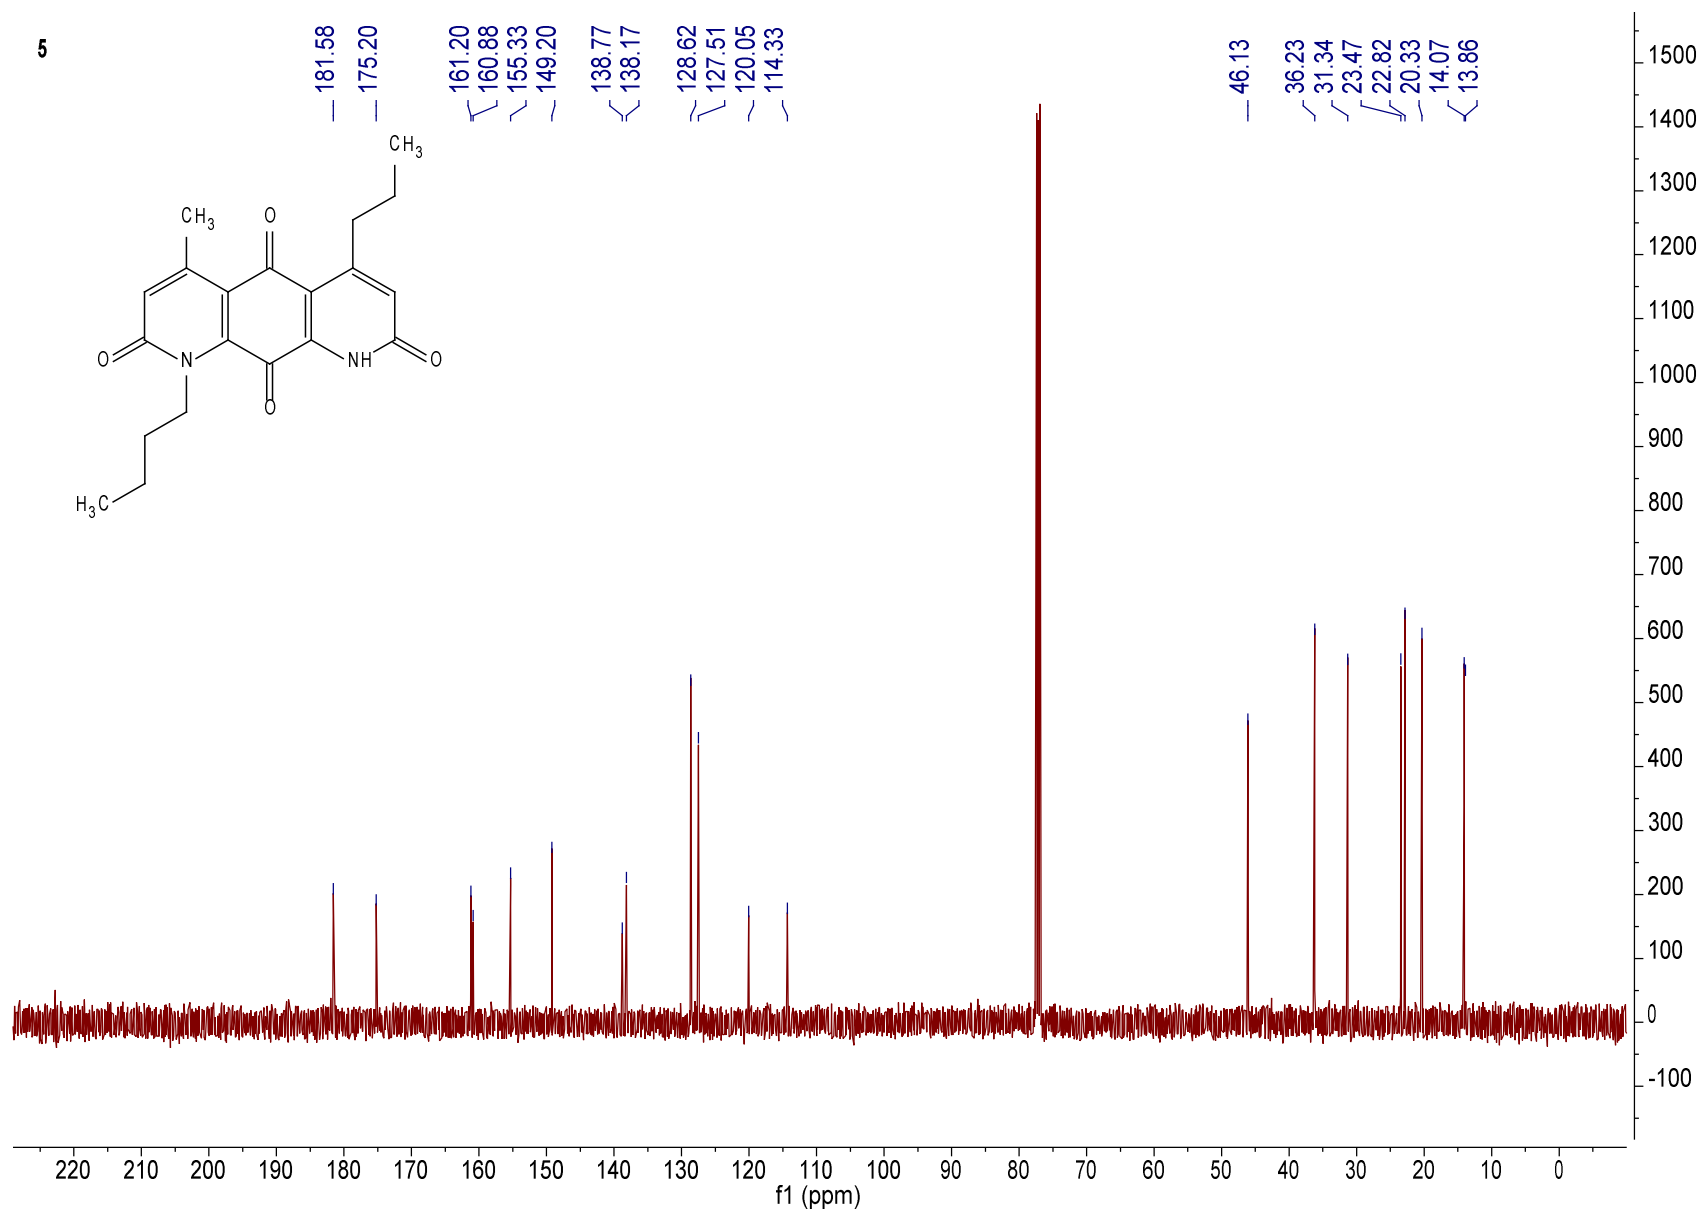

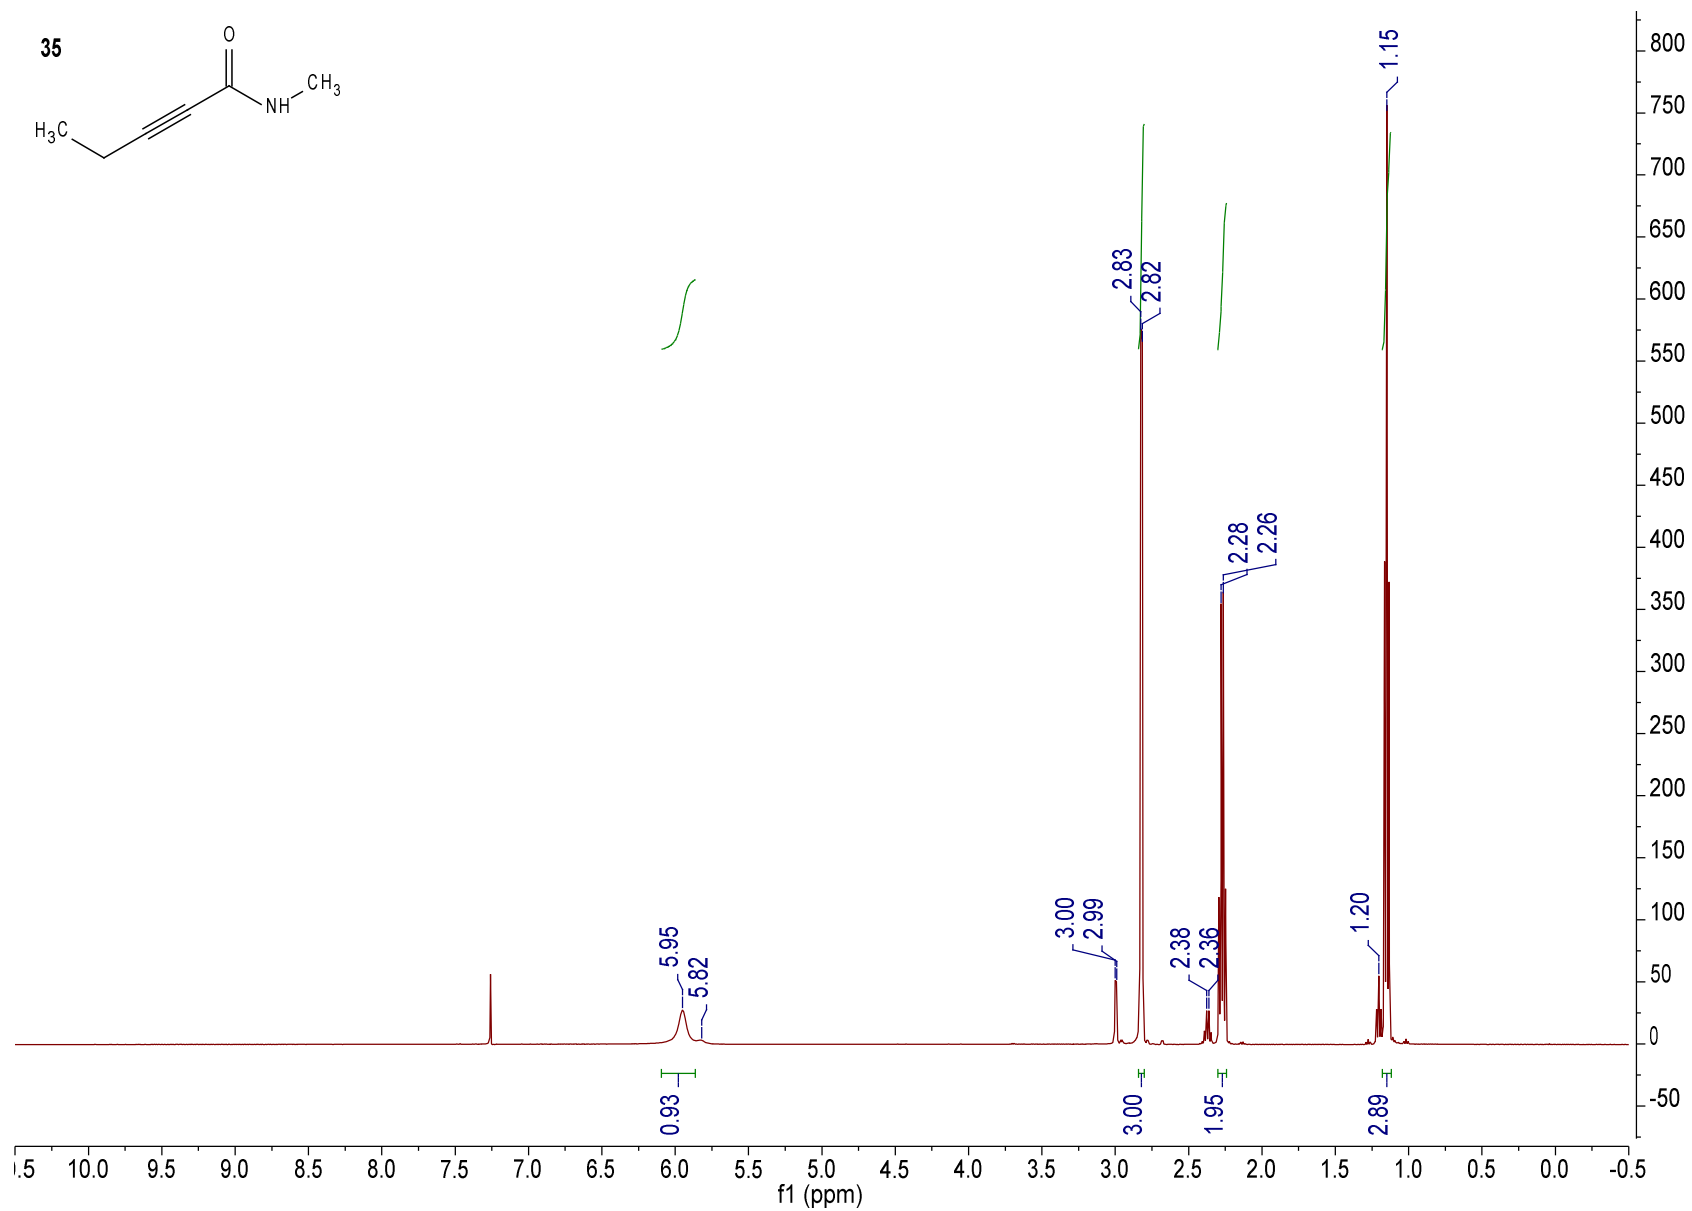

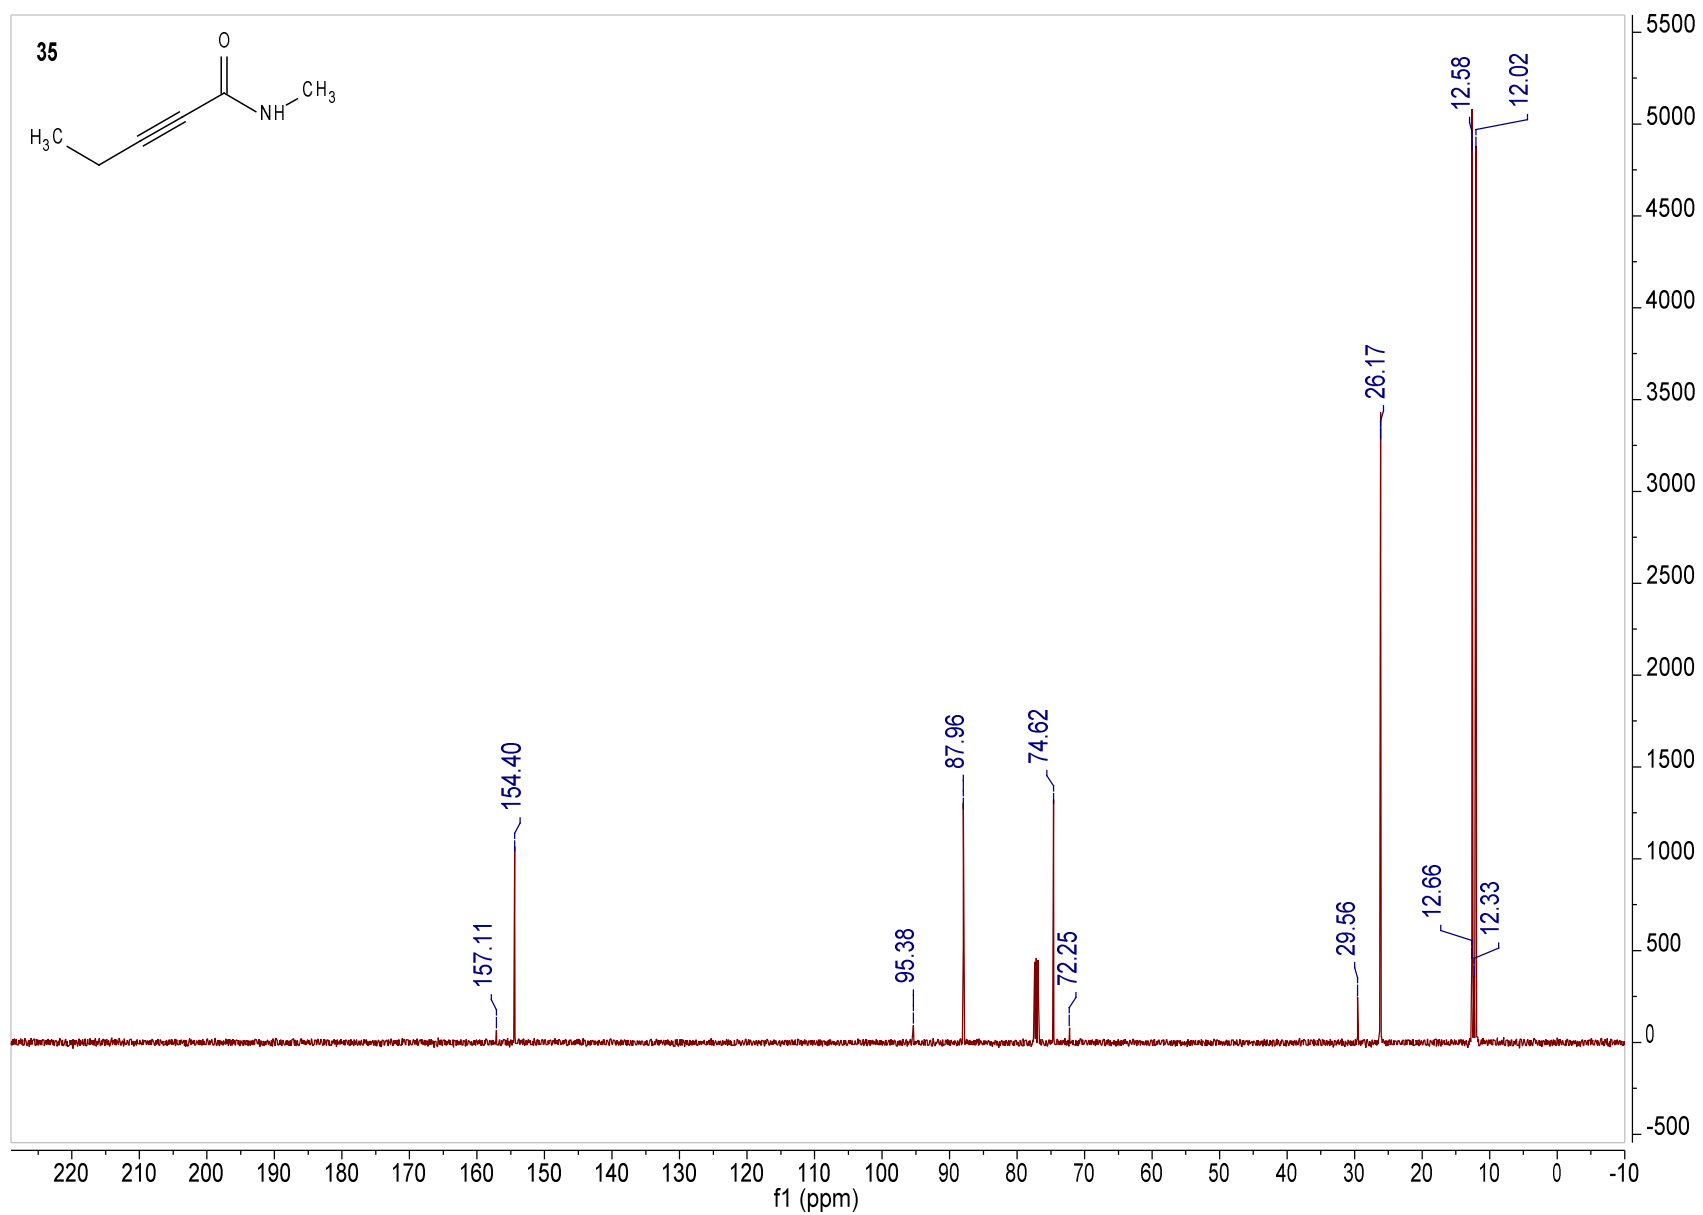



36

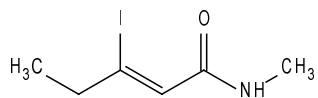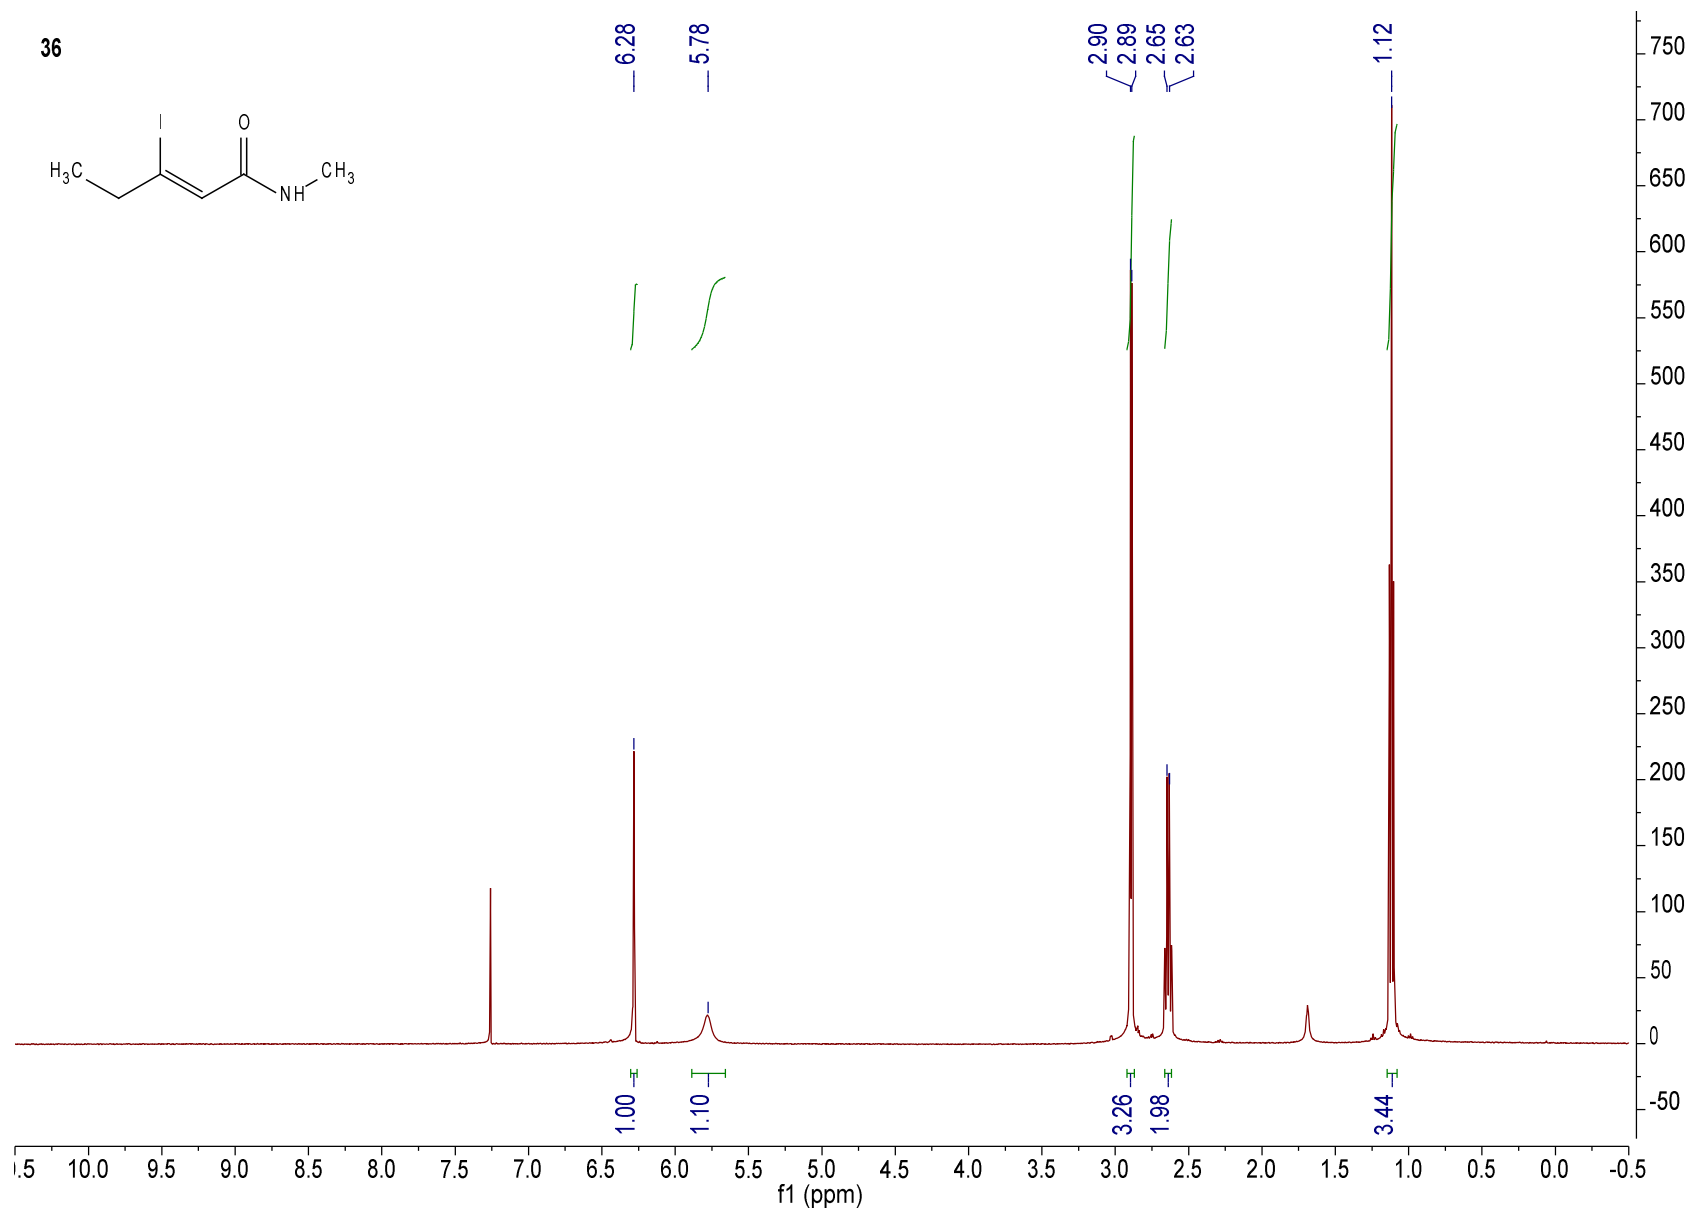

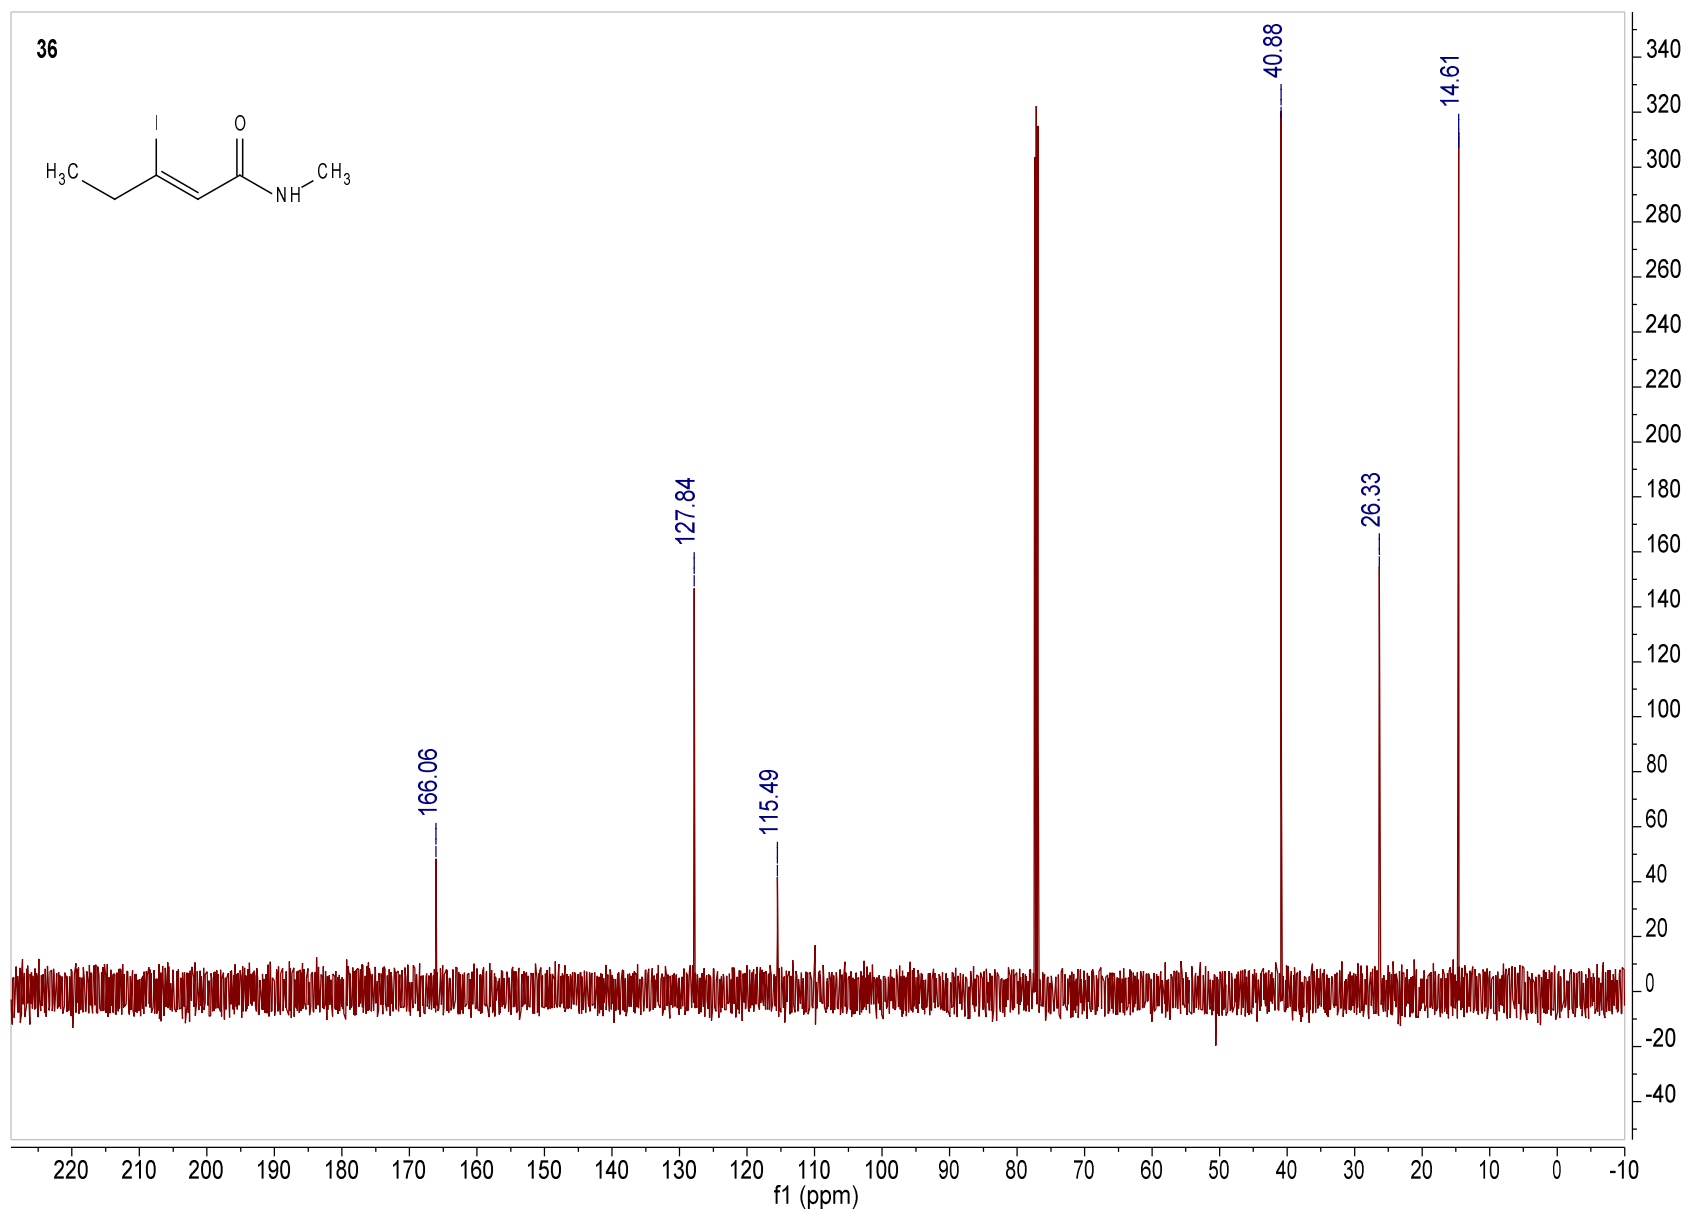

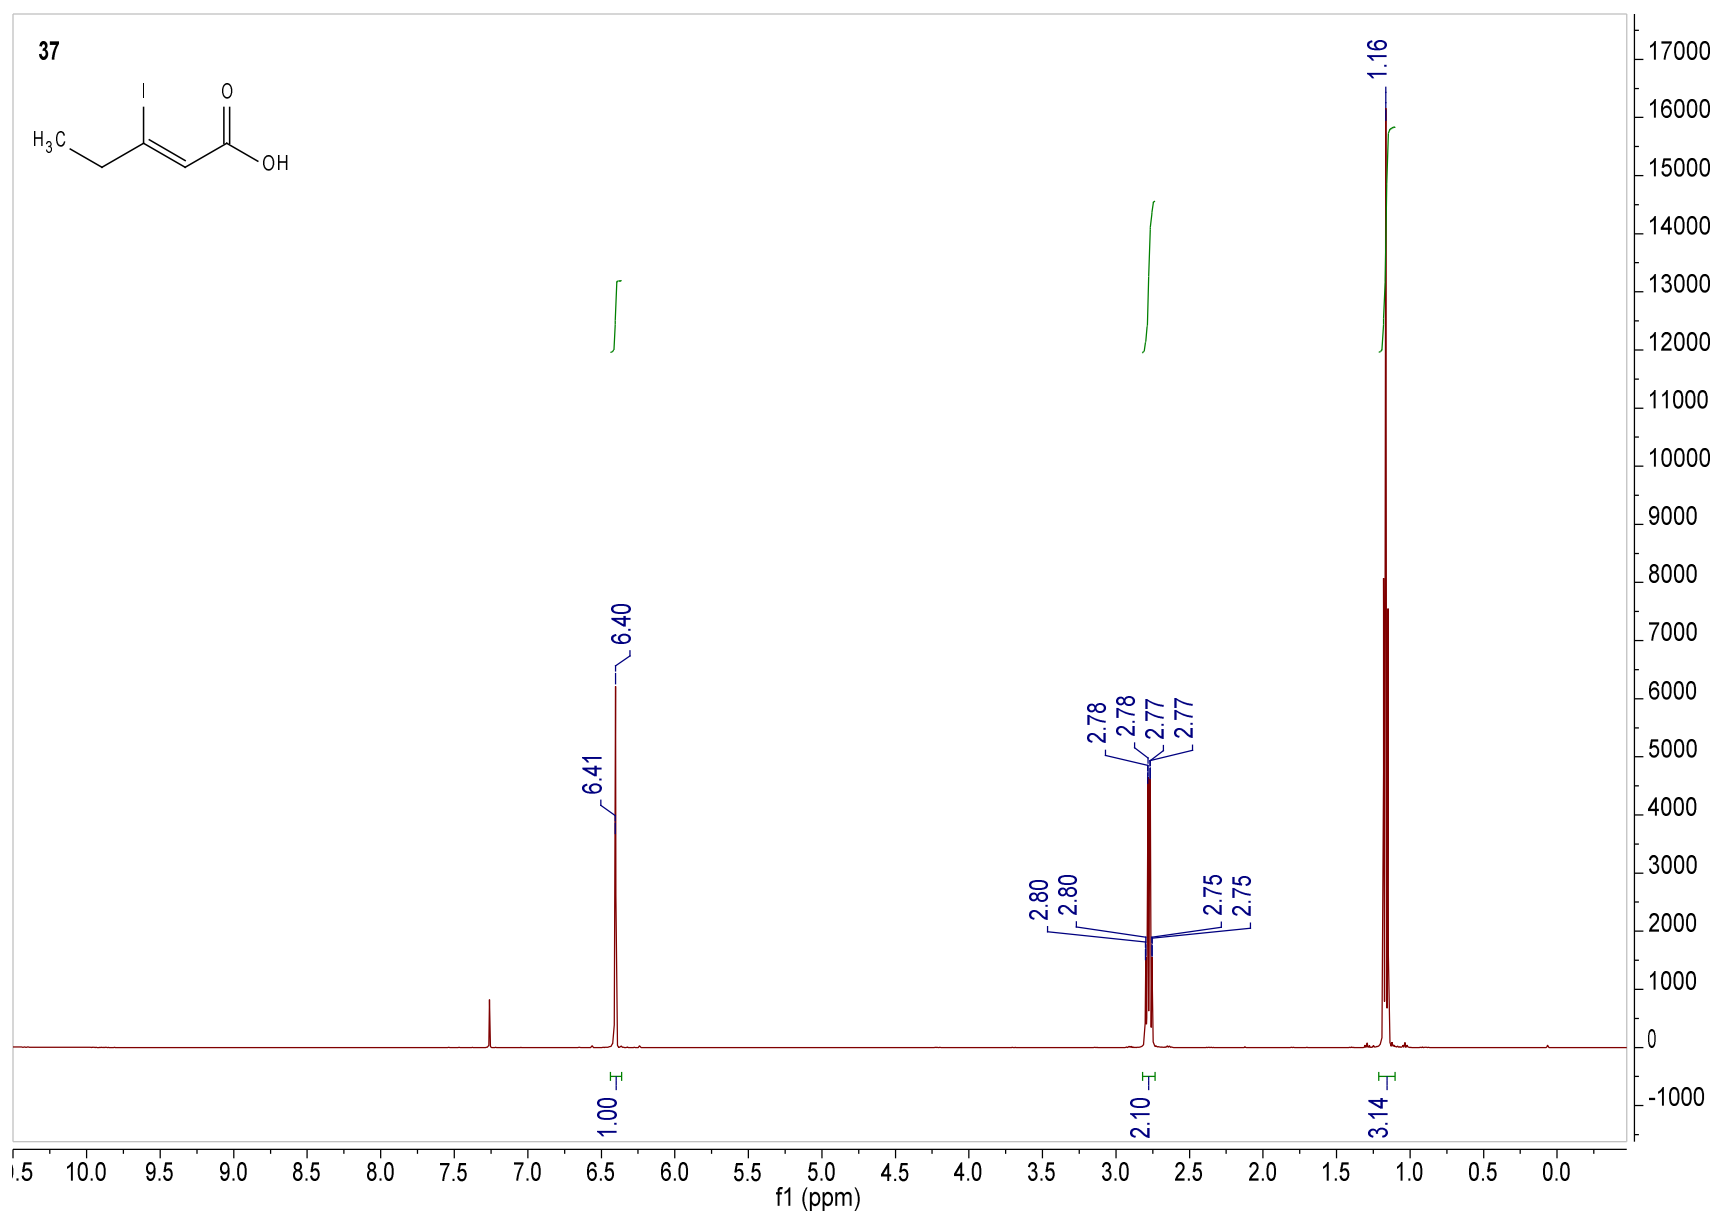

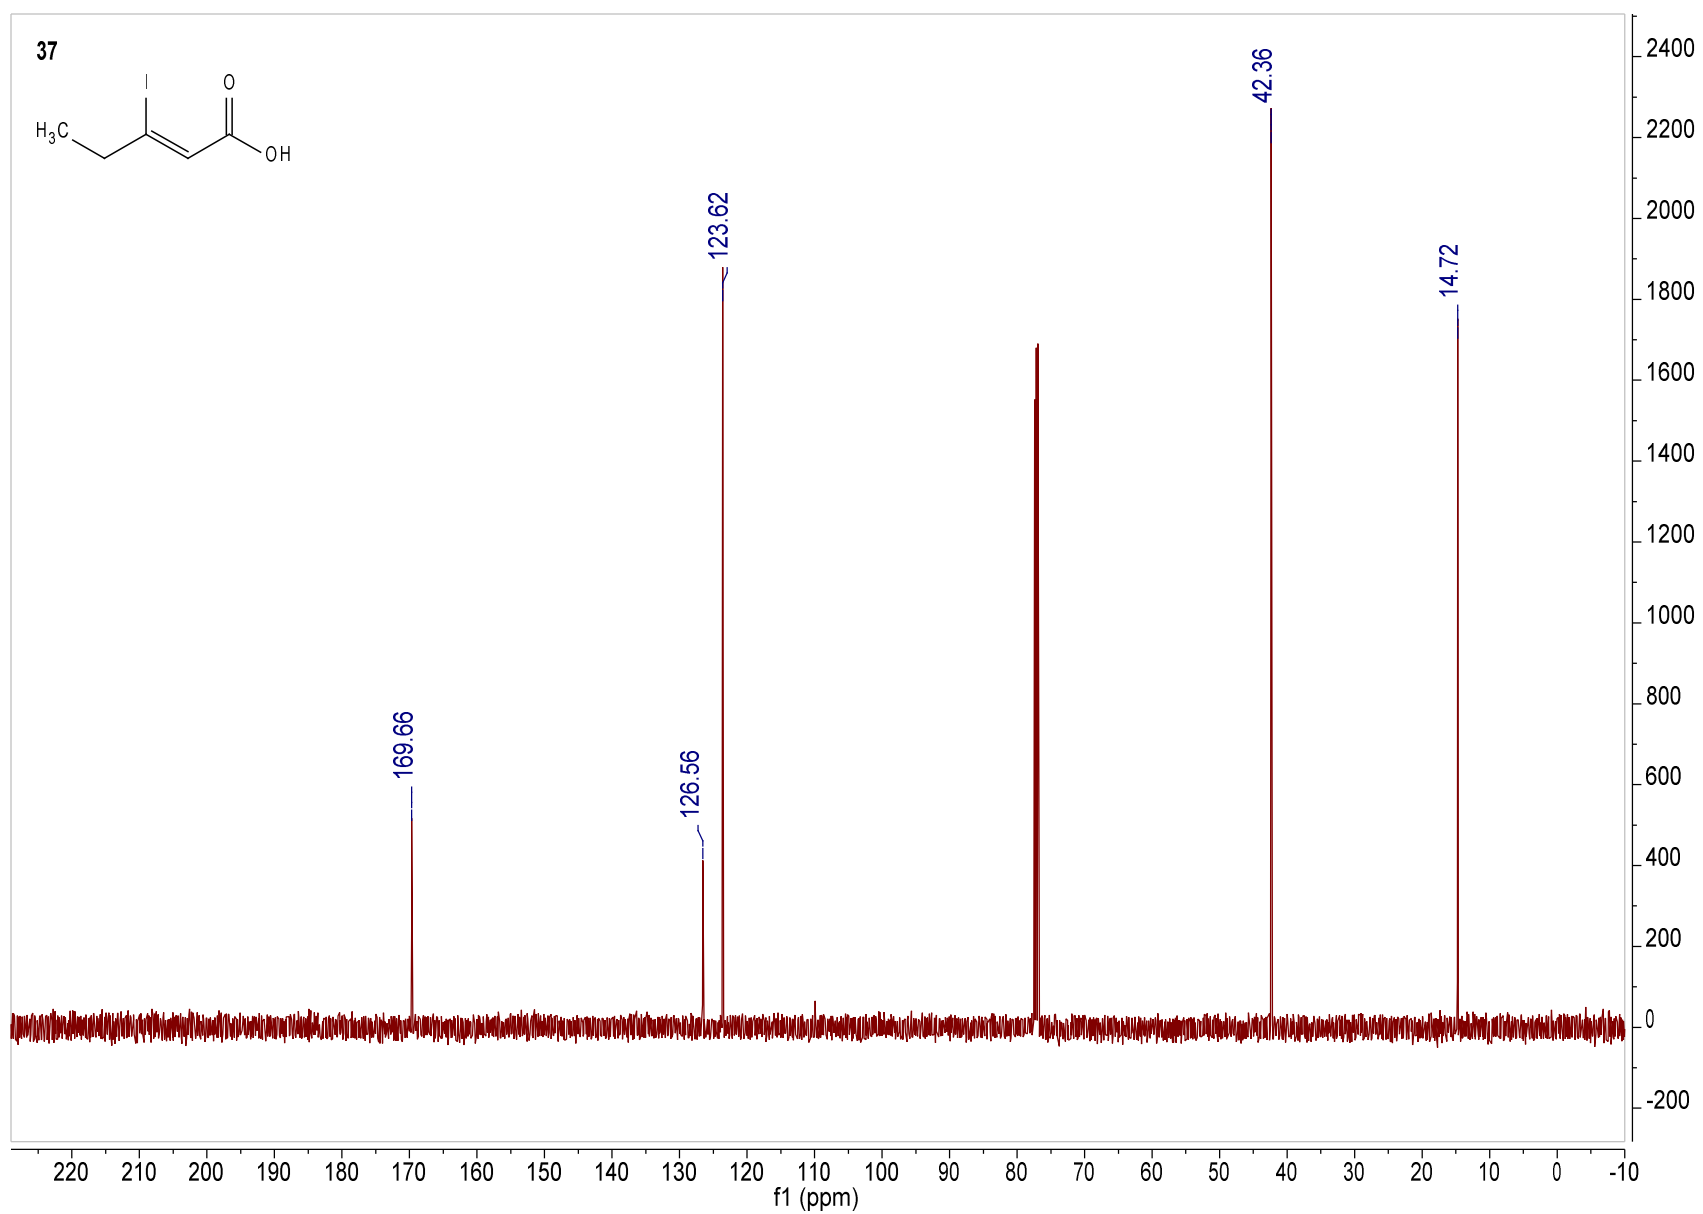

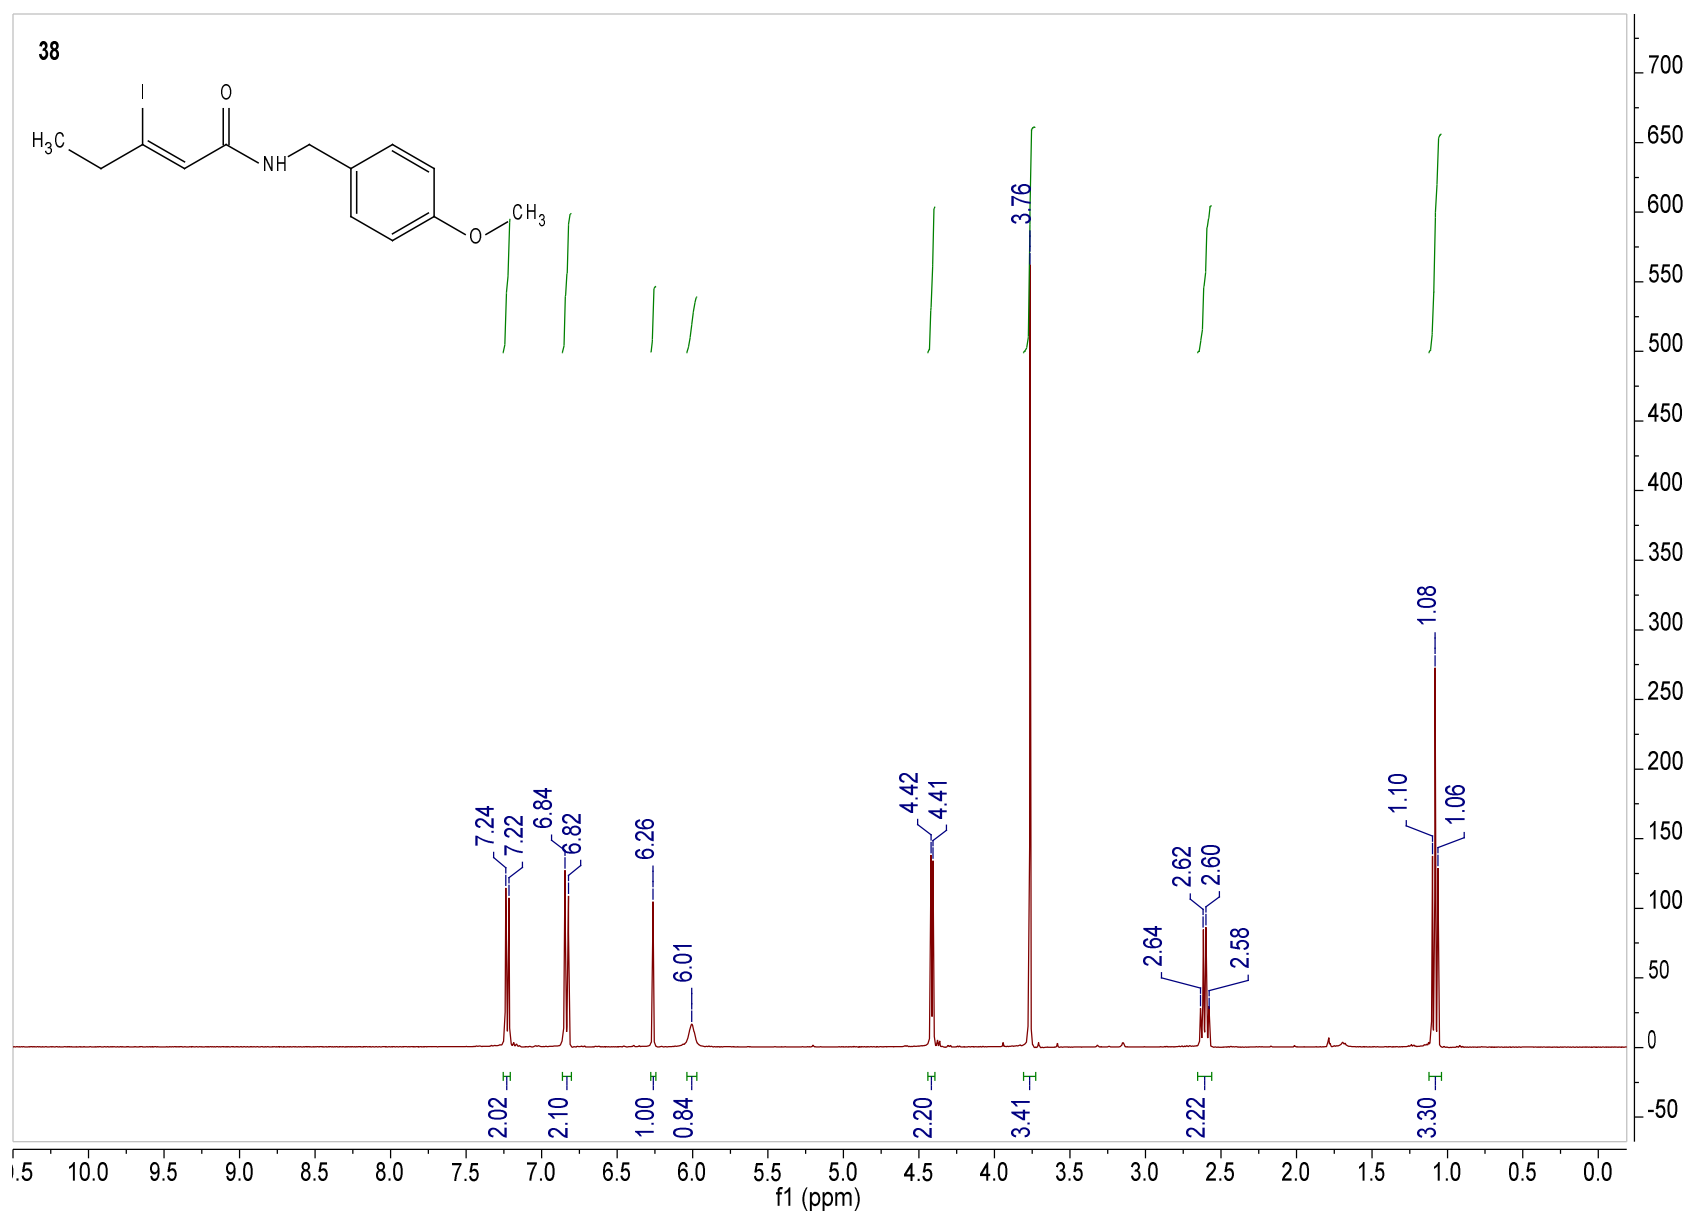

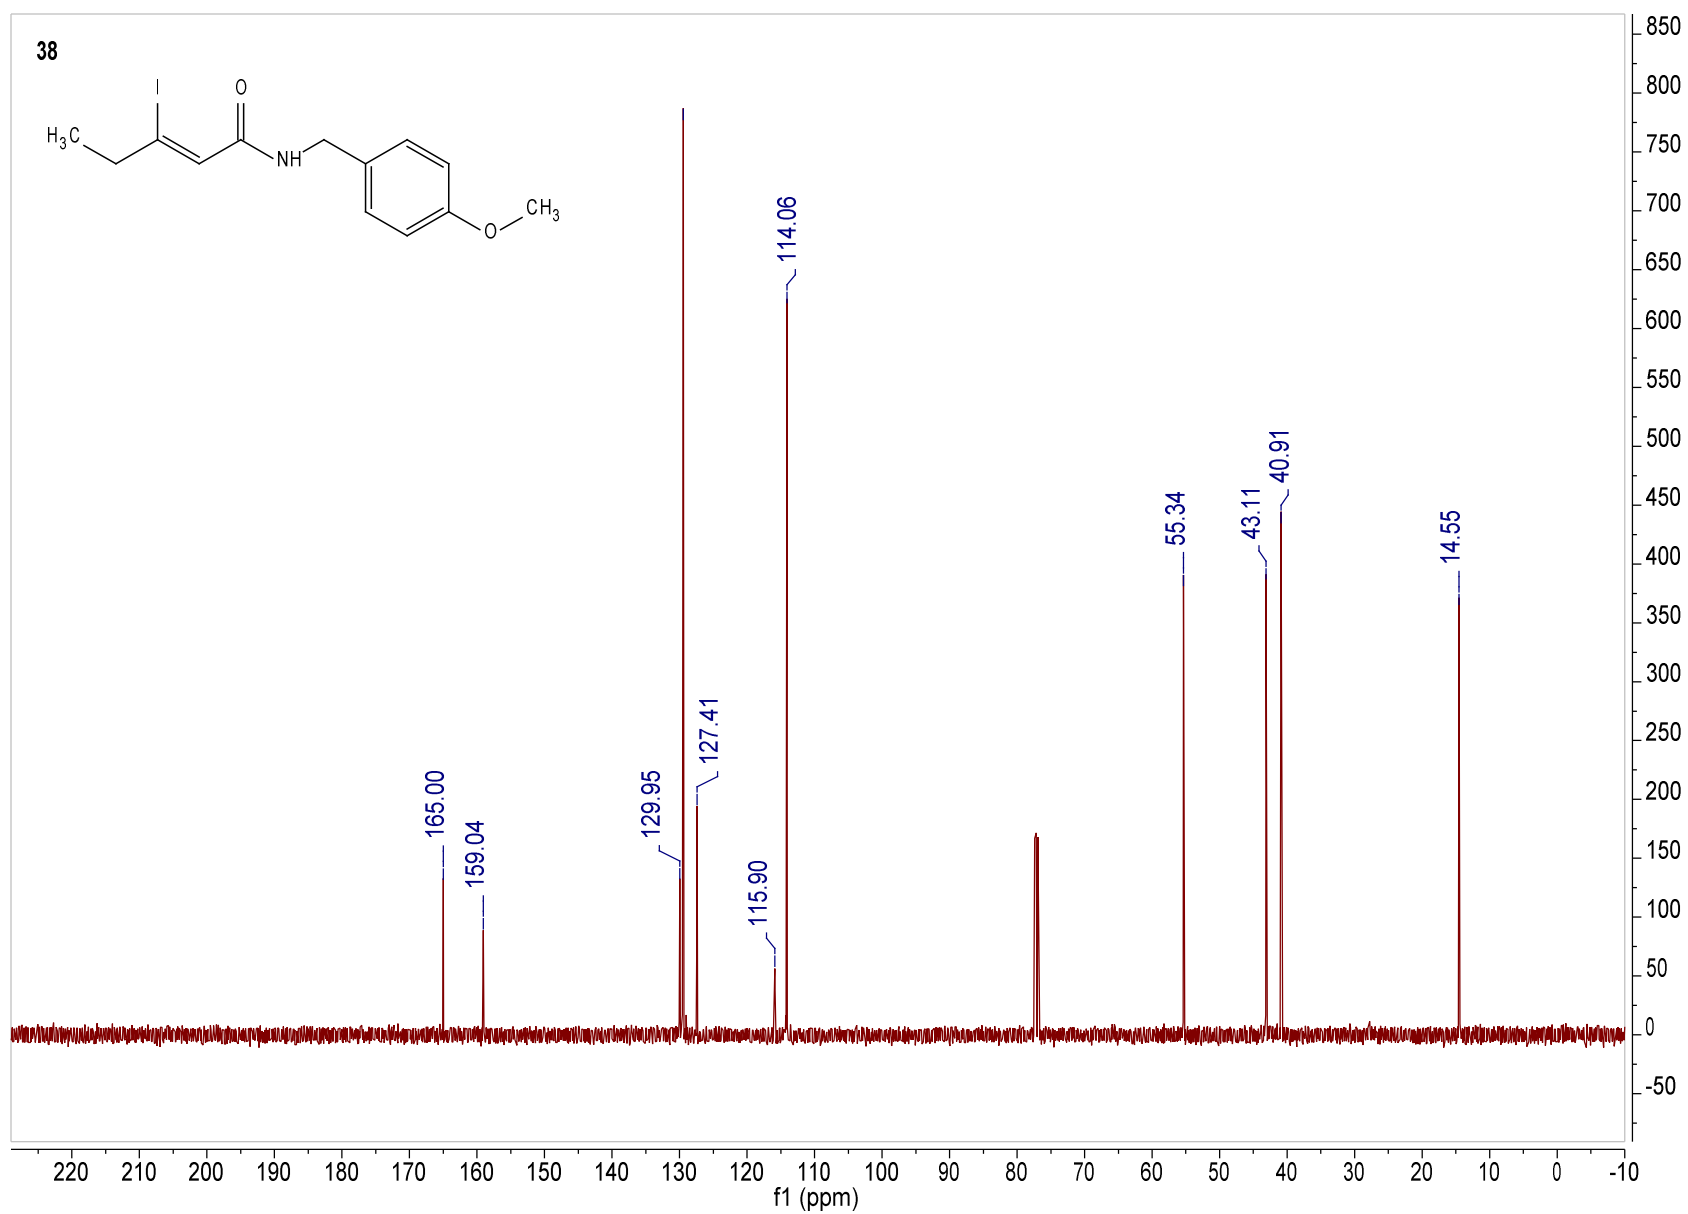

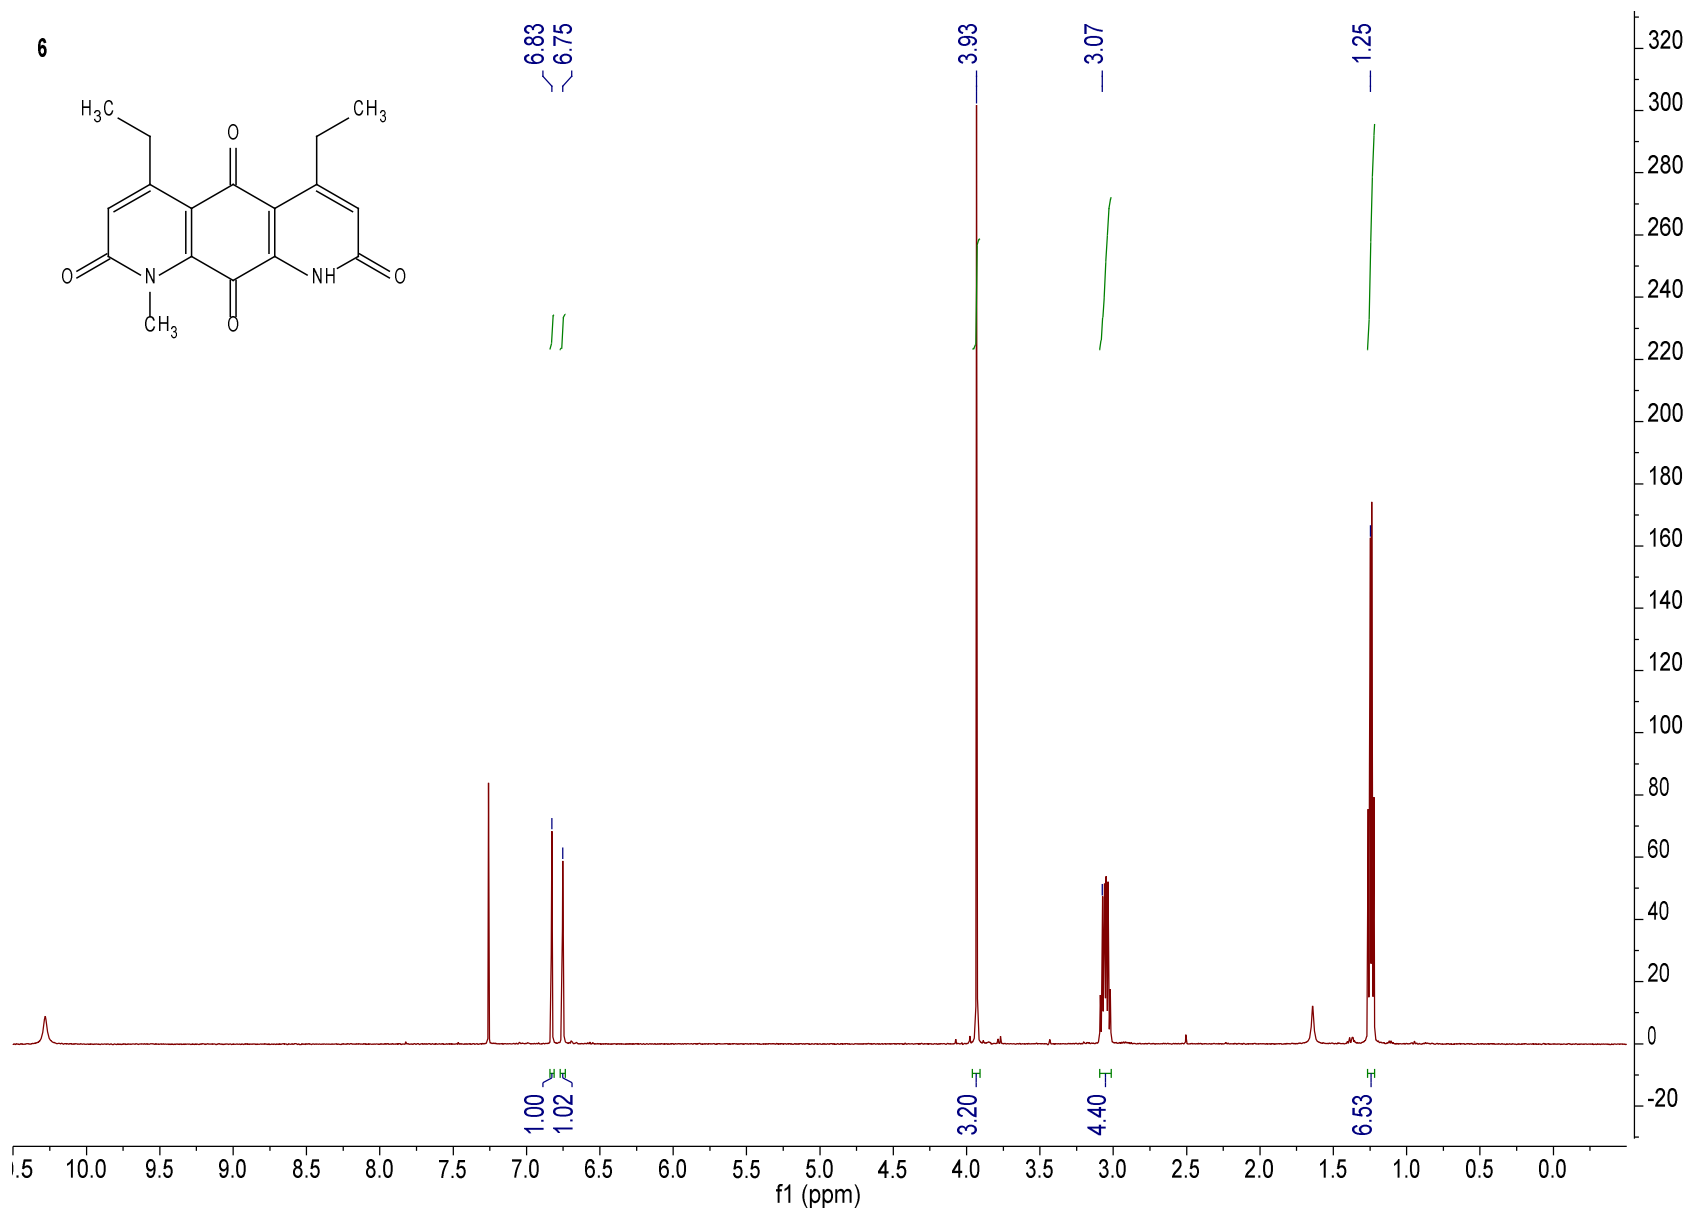

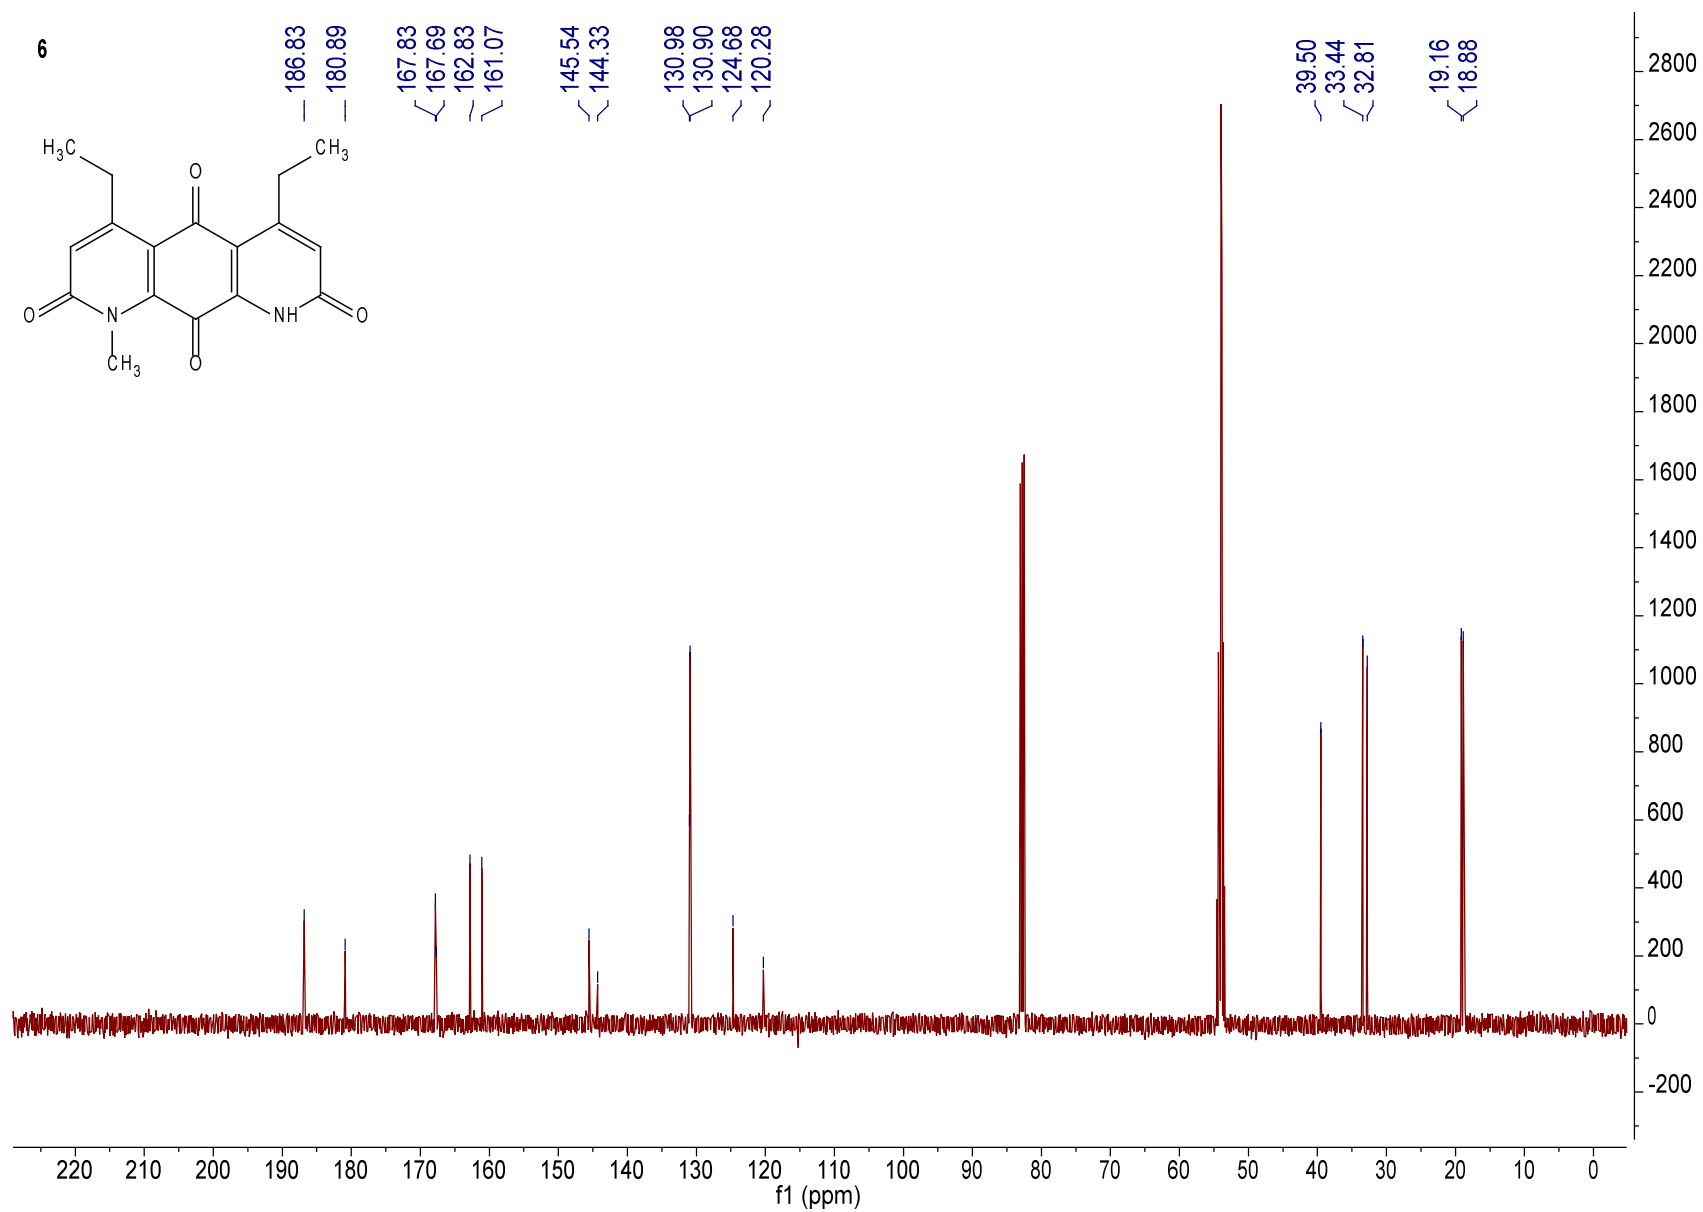



39

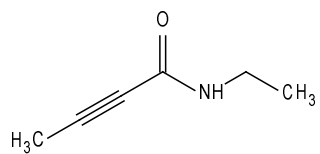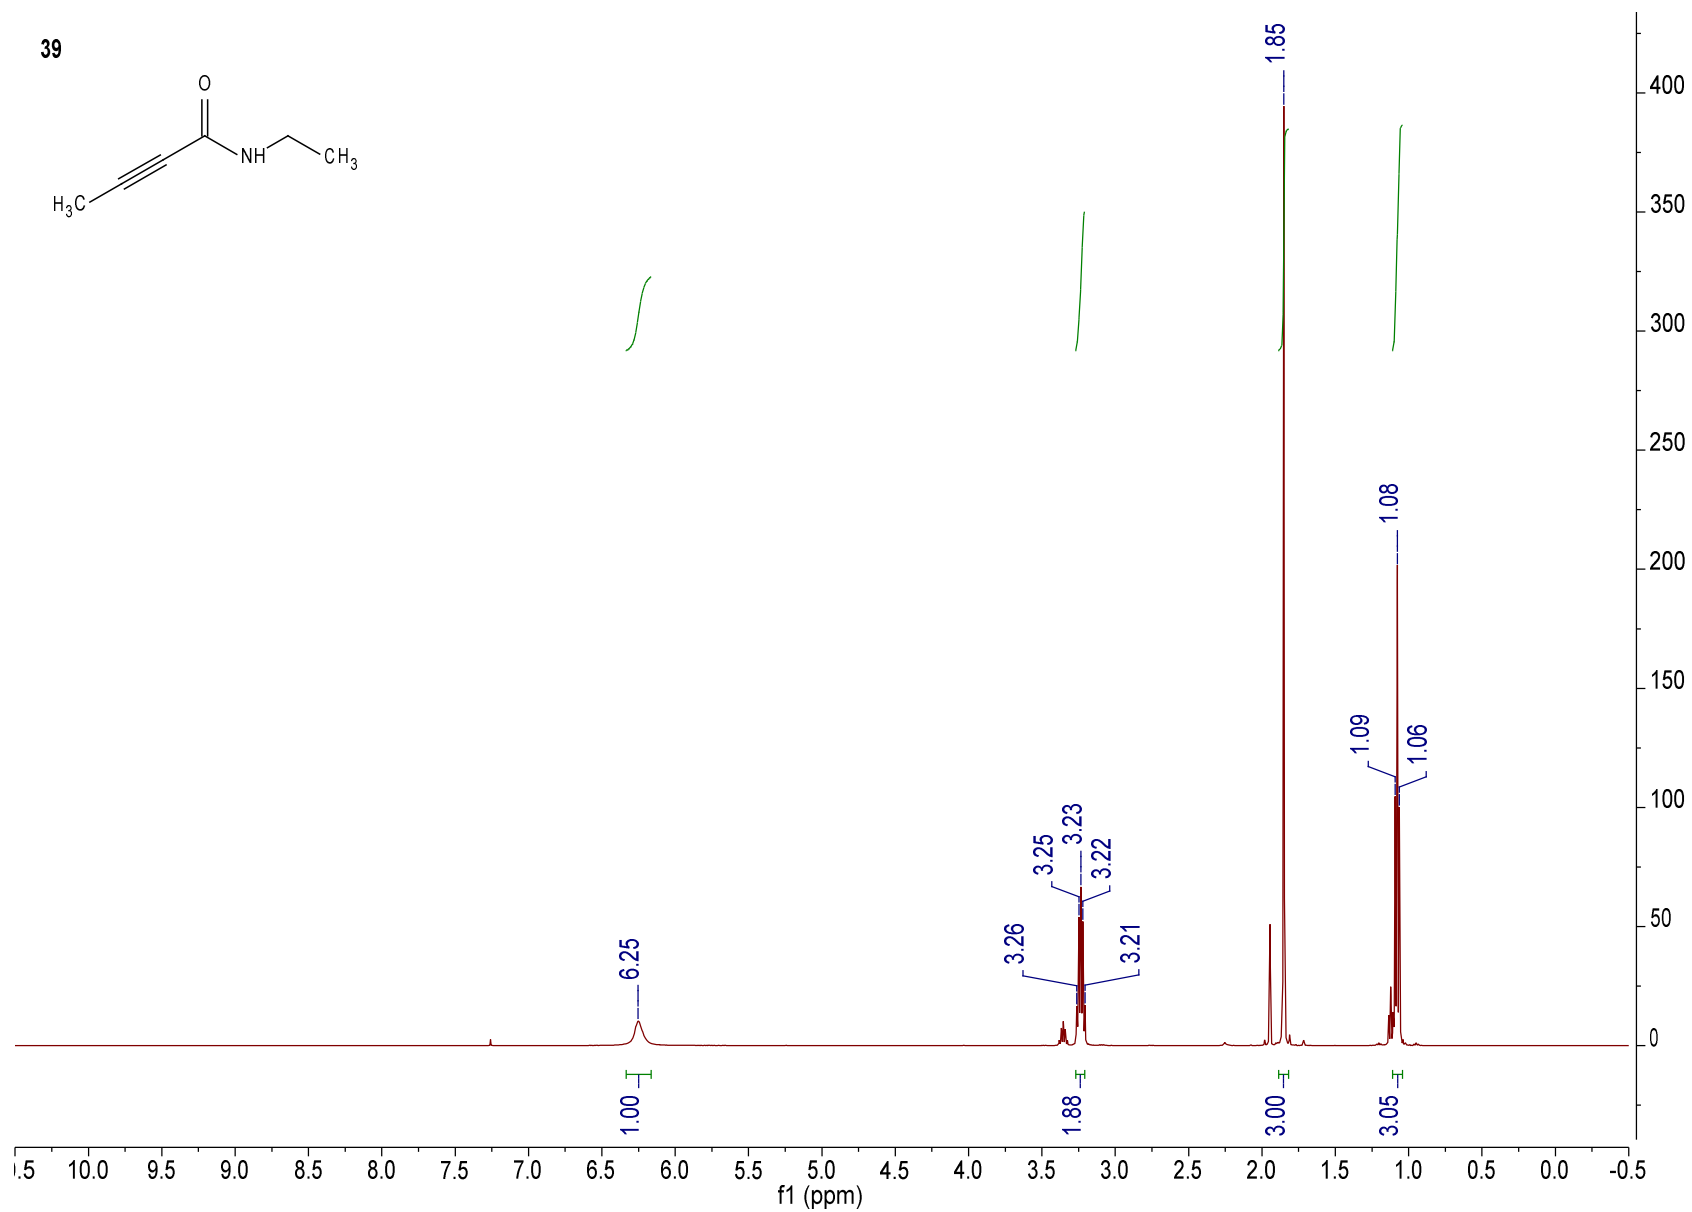

39

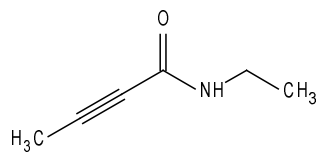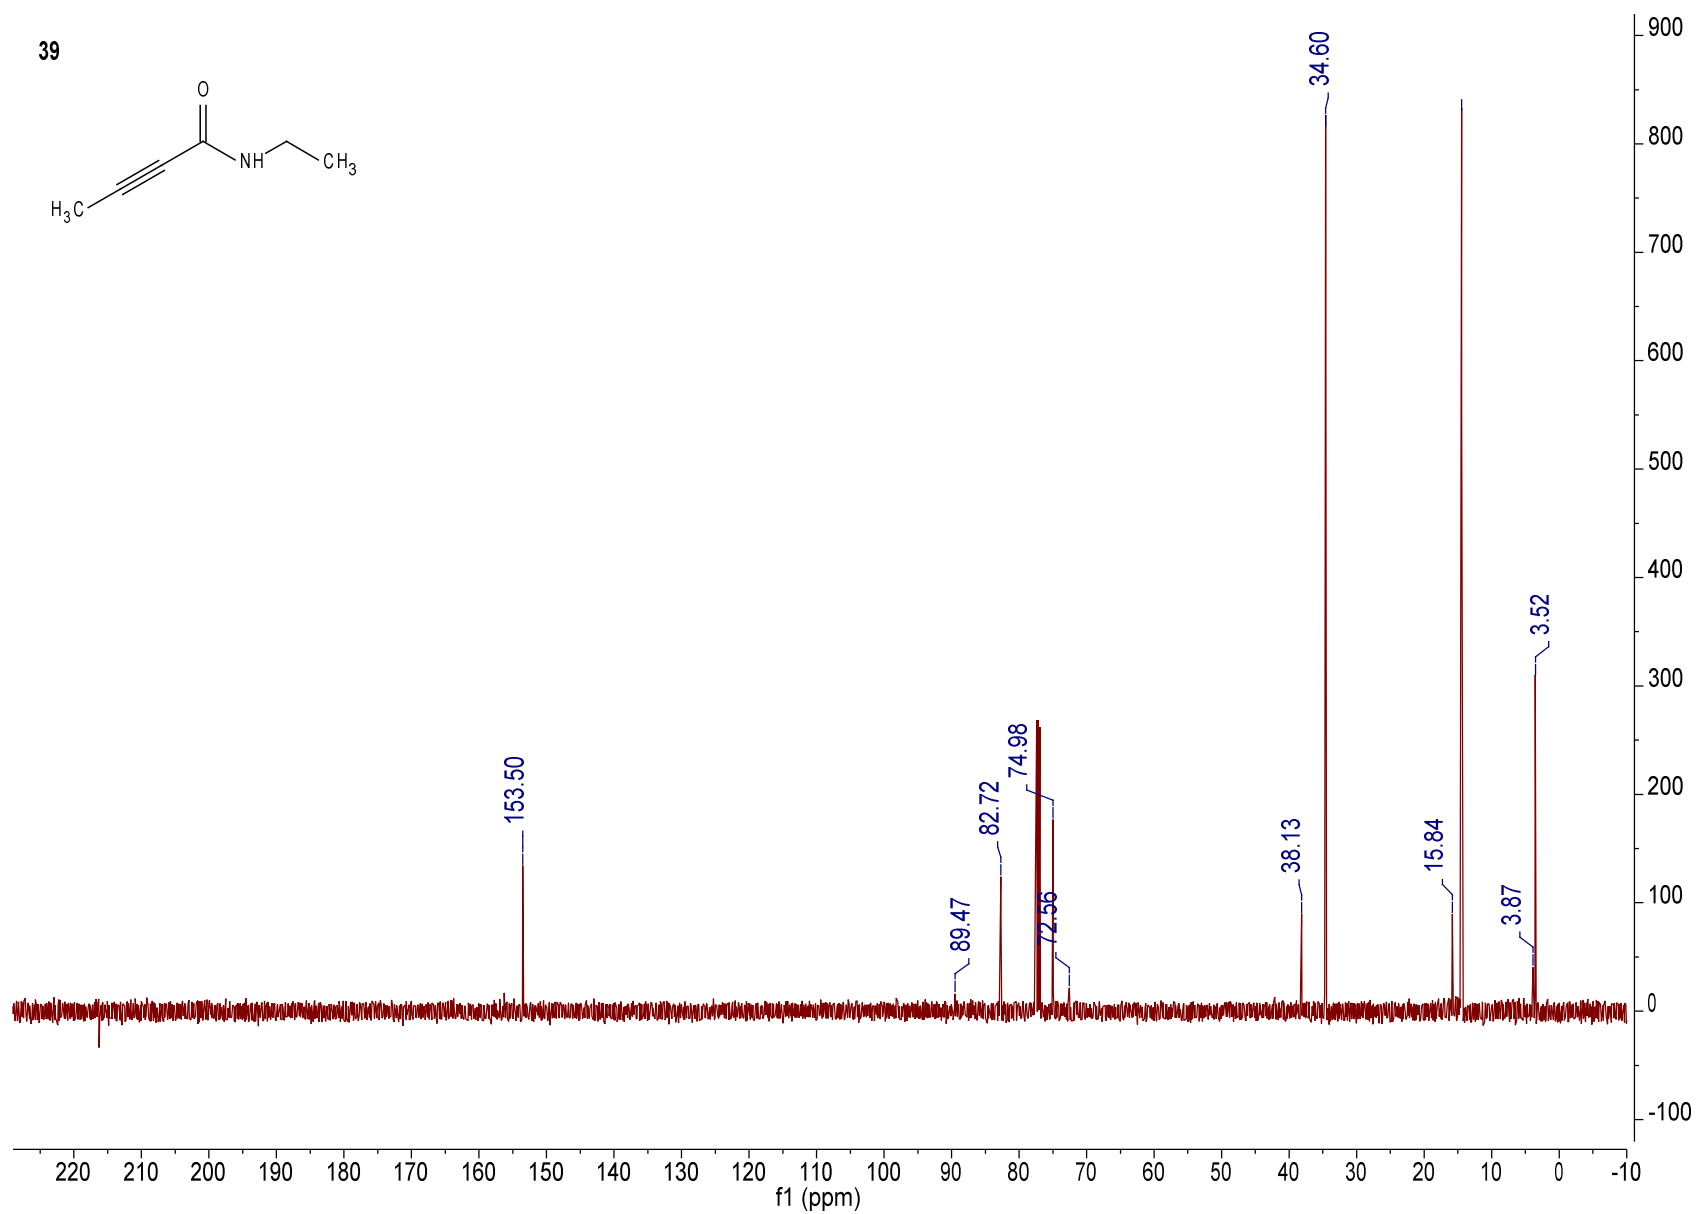

40

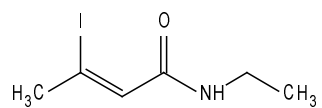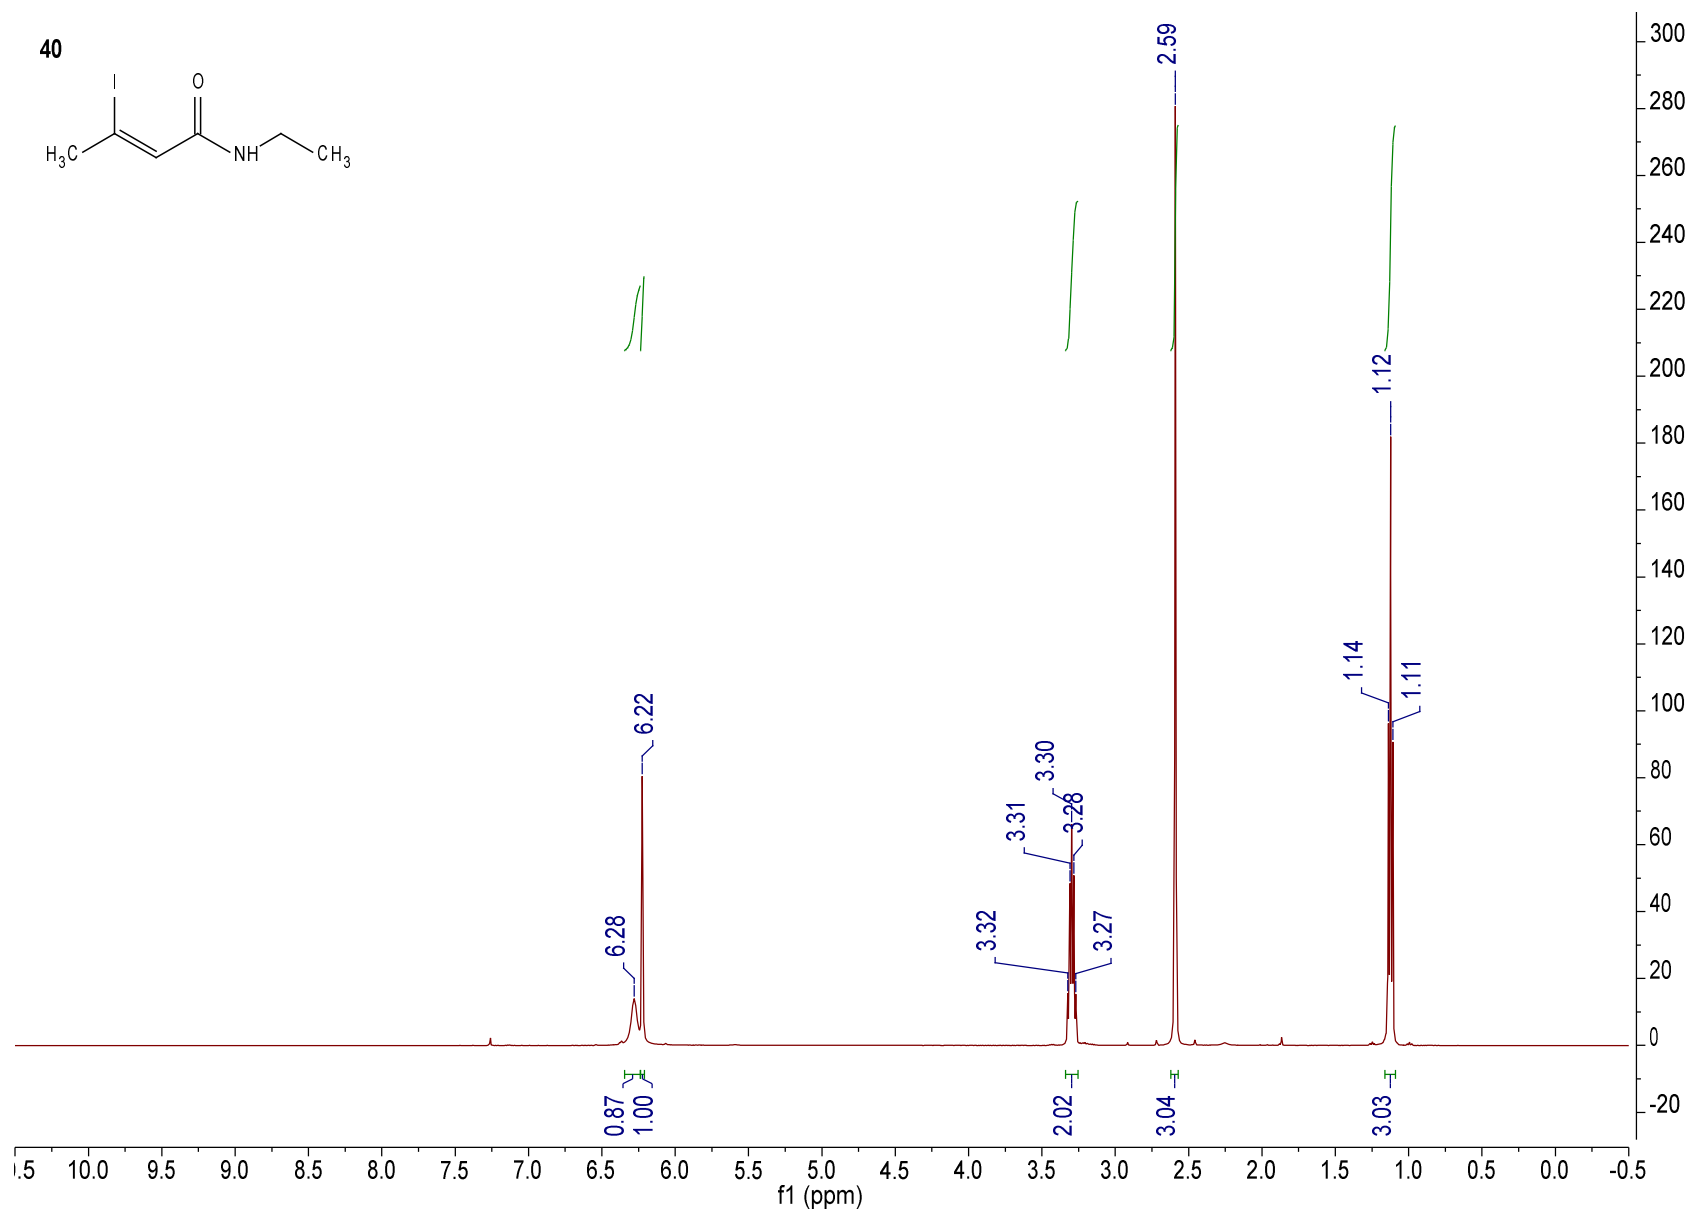

40

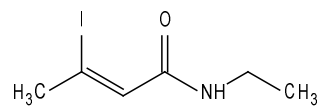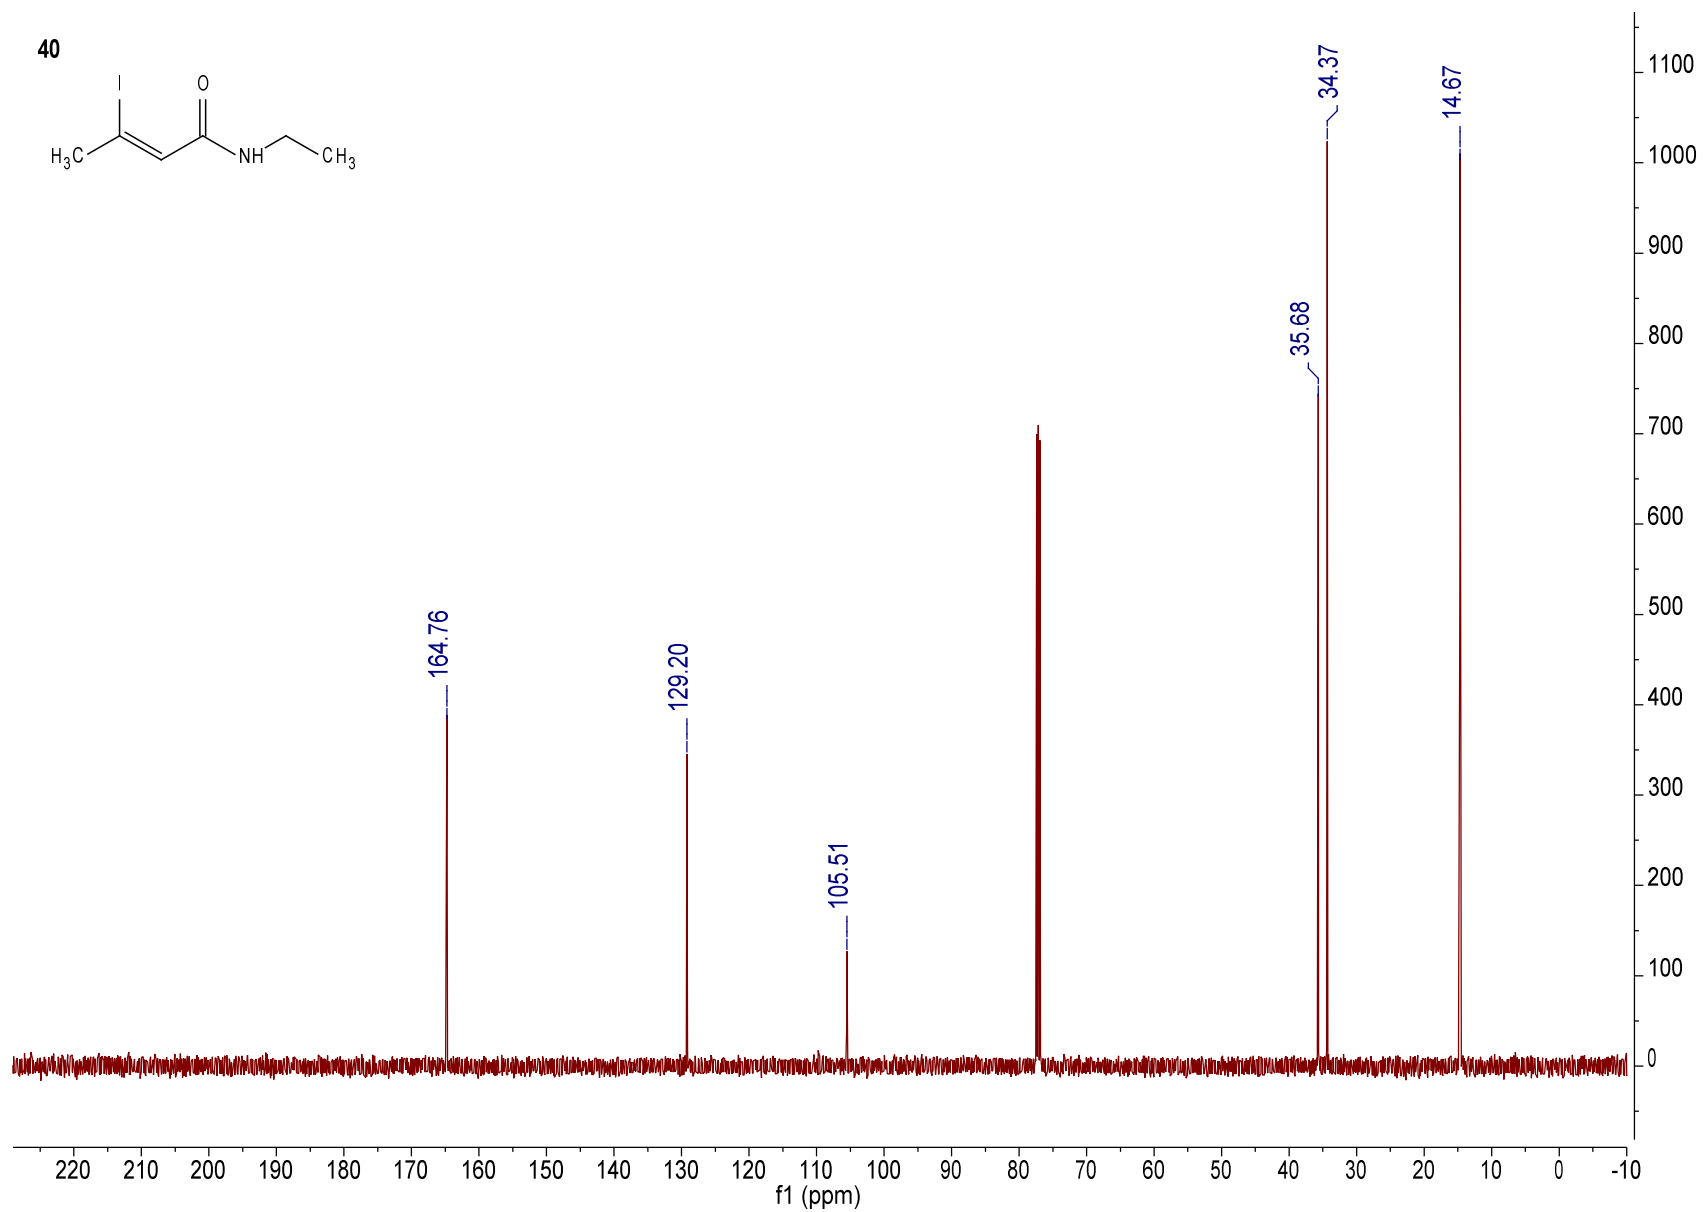

7

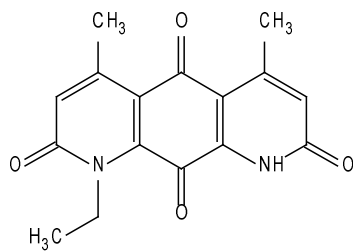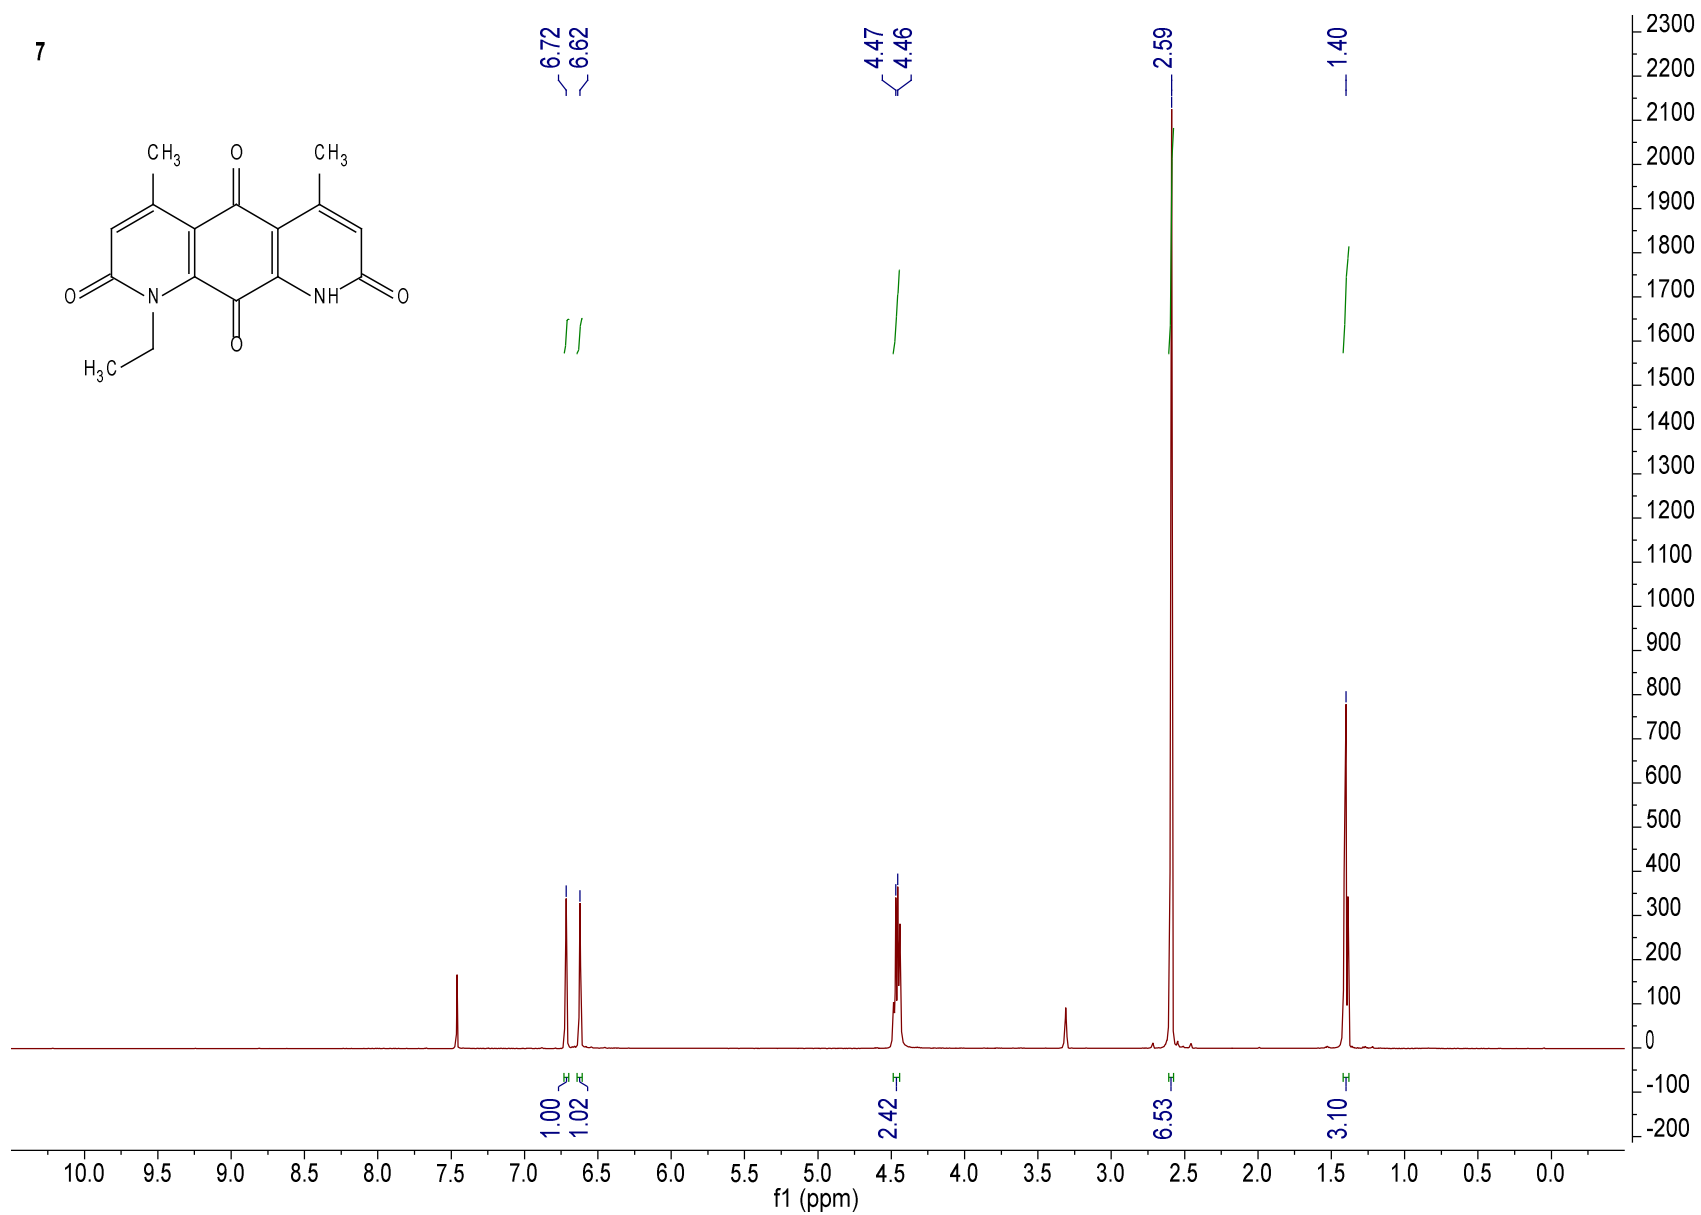

7

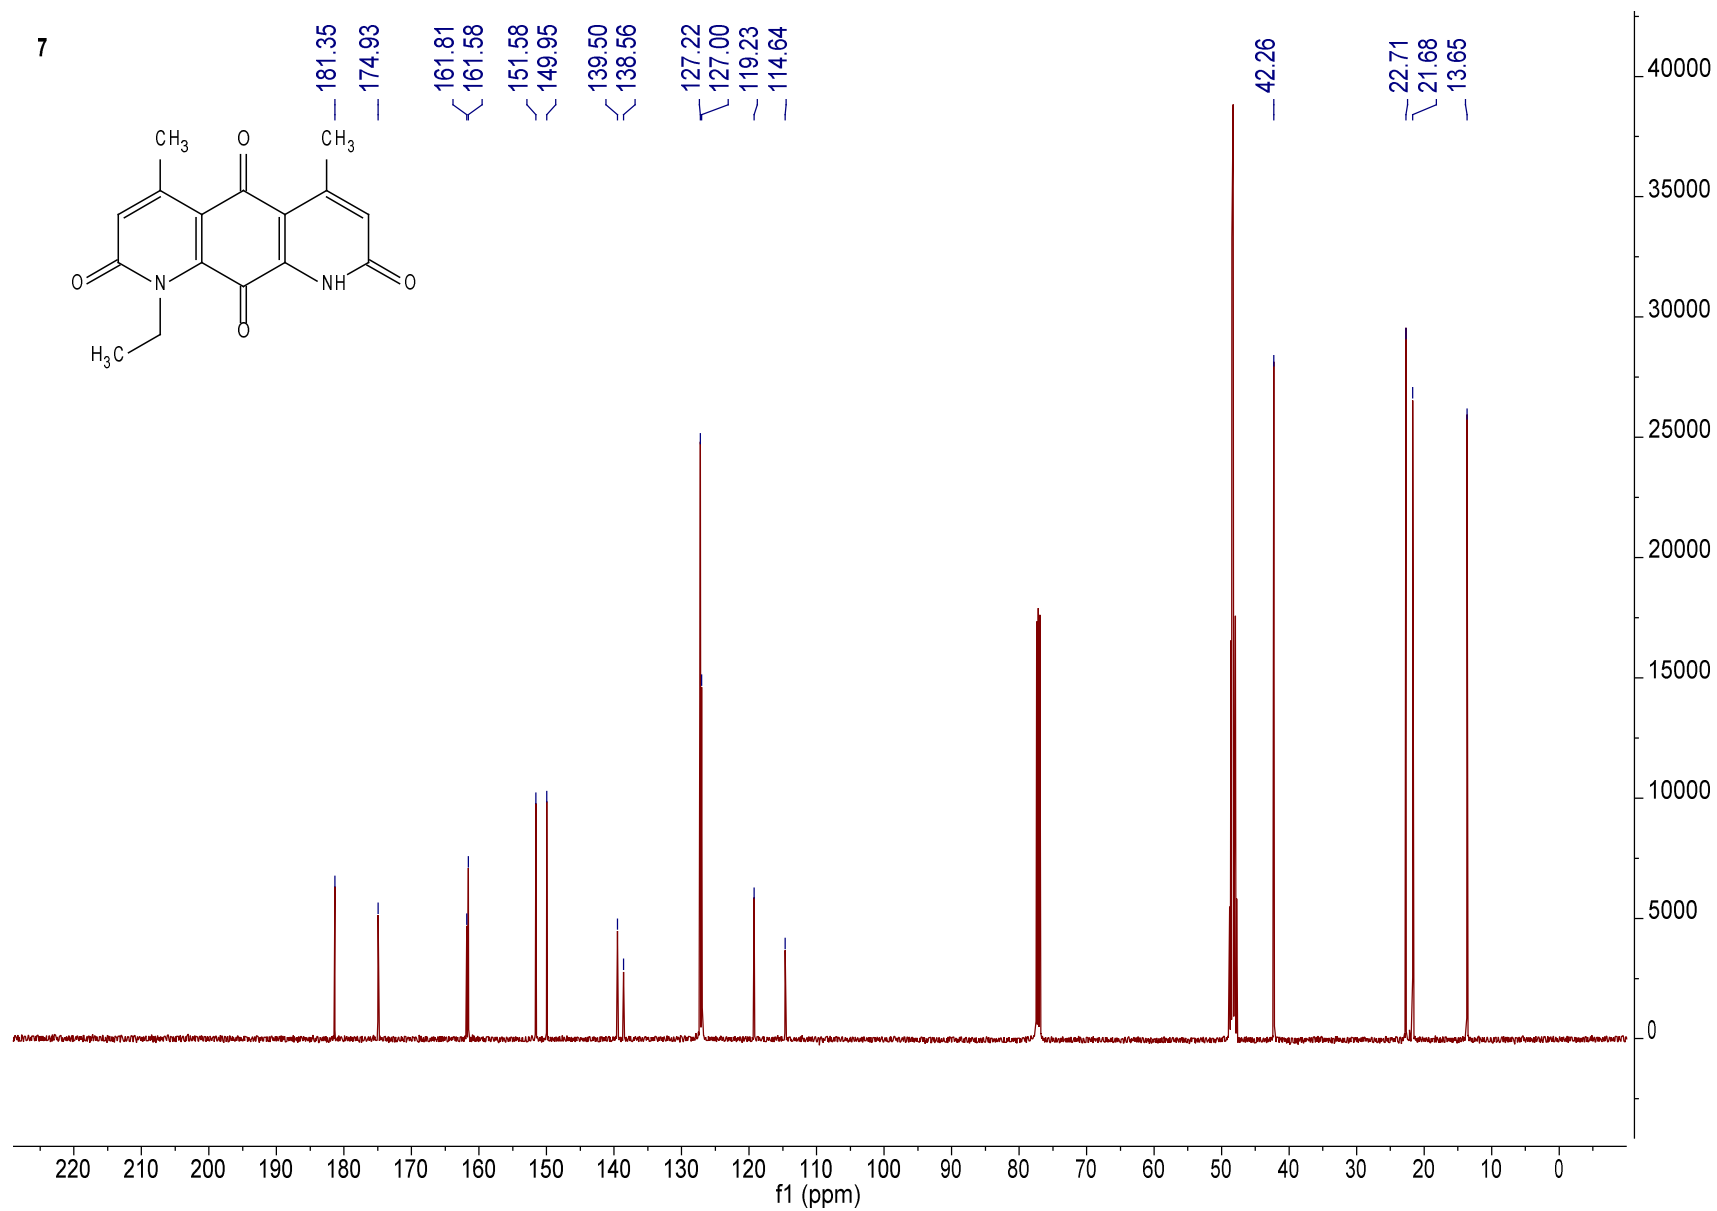

41

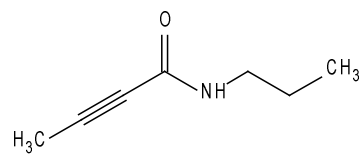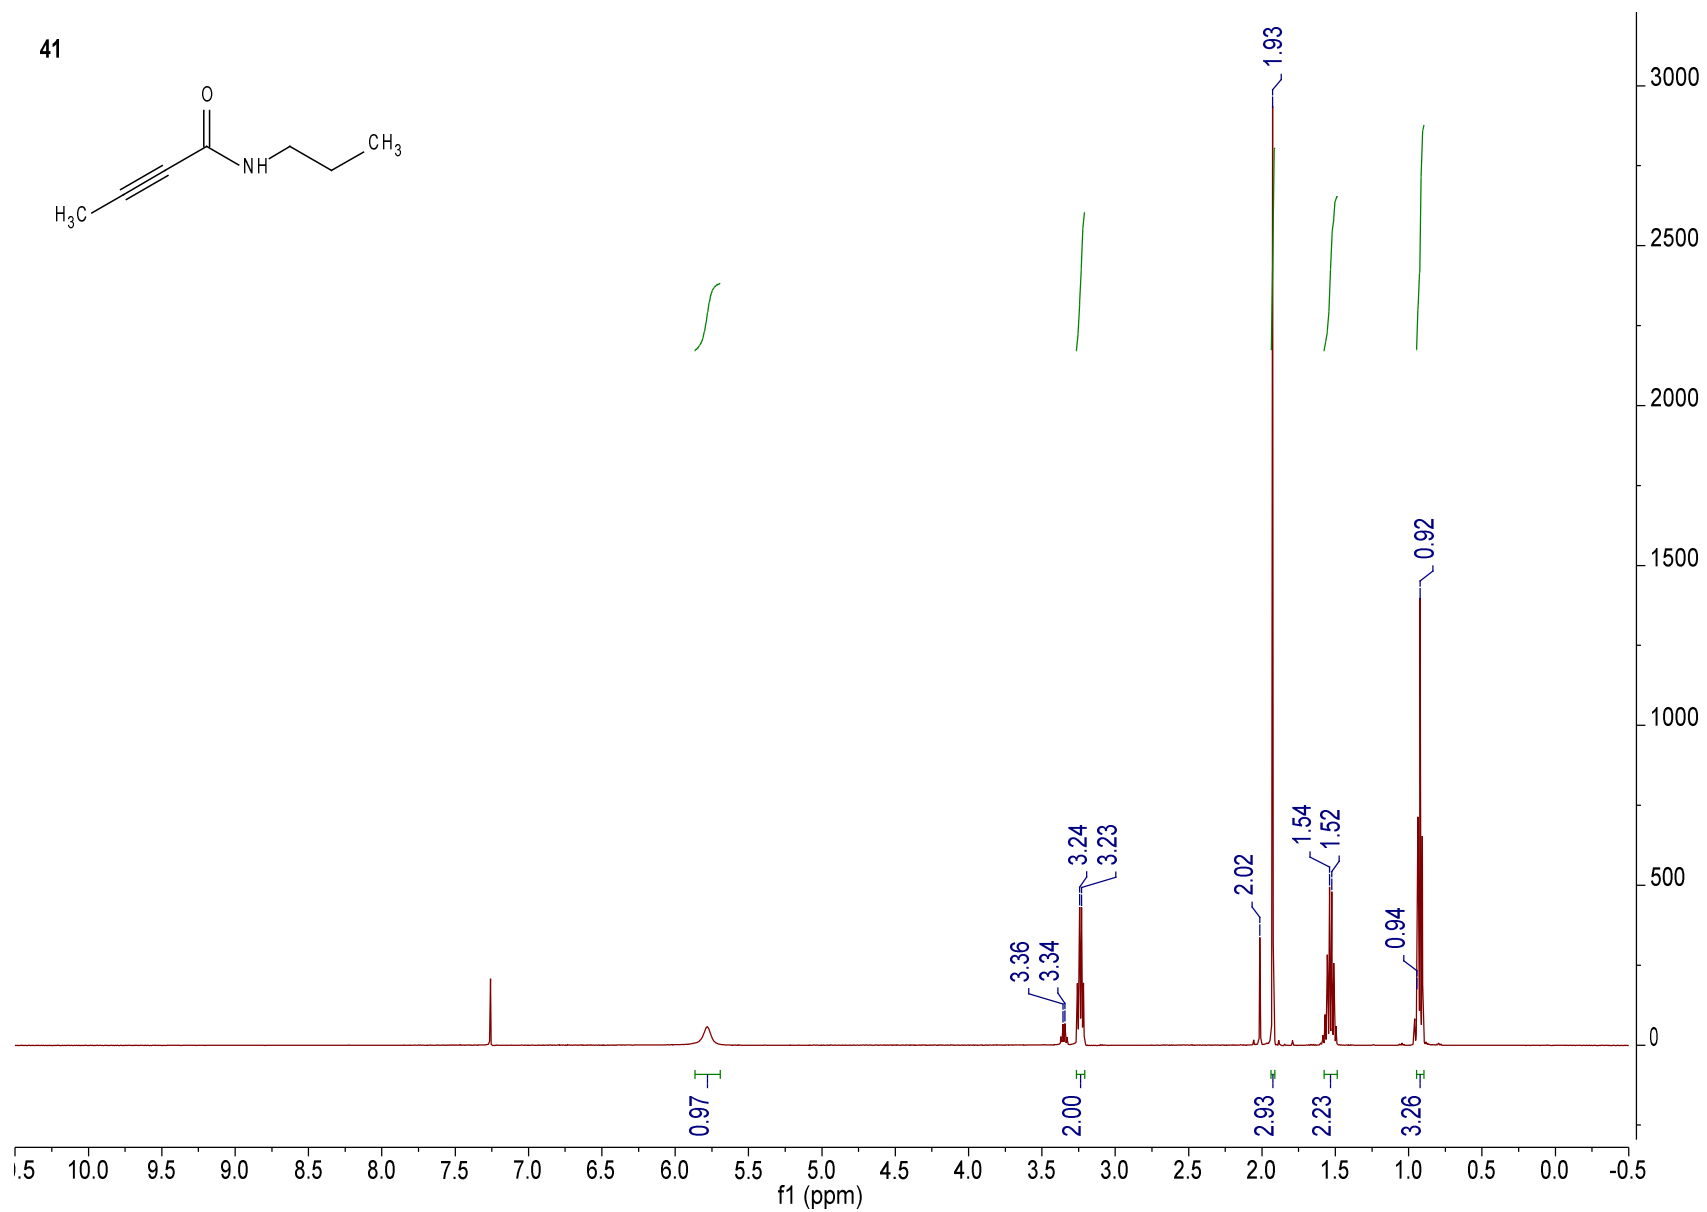

41

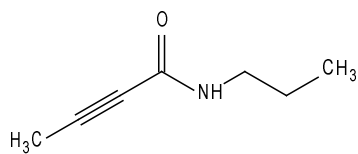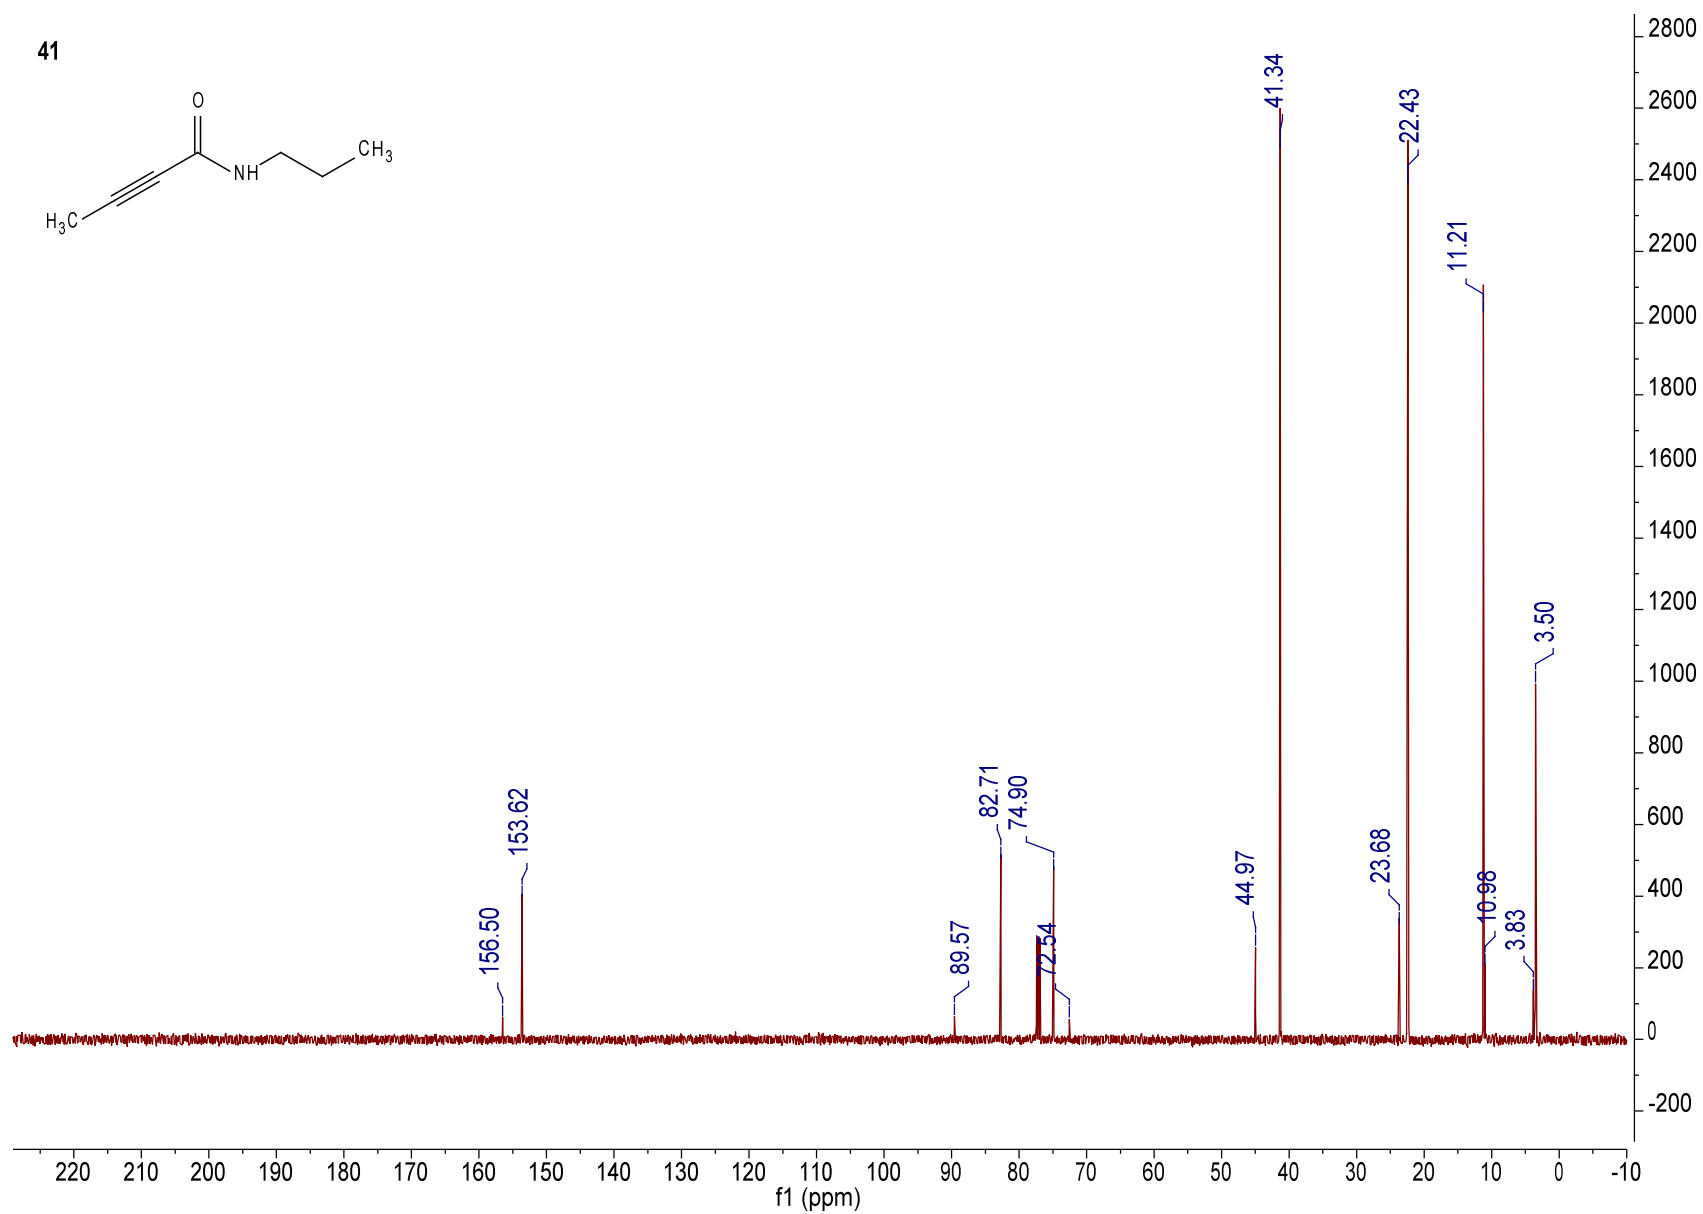



42

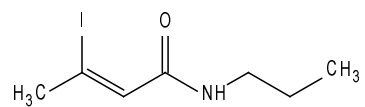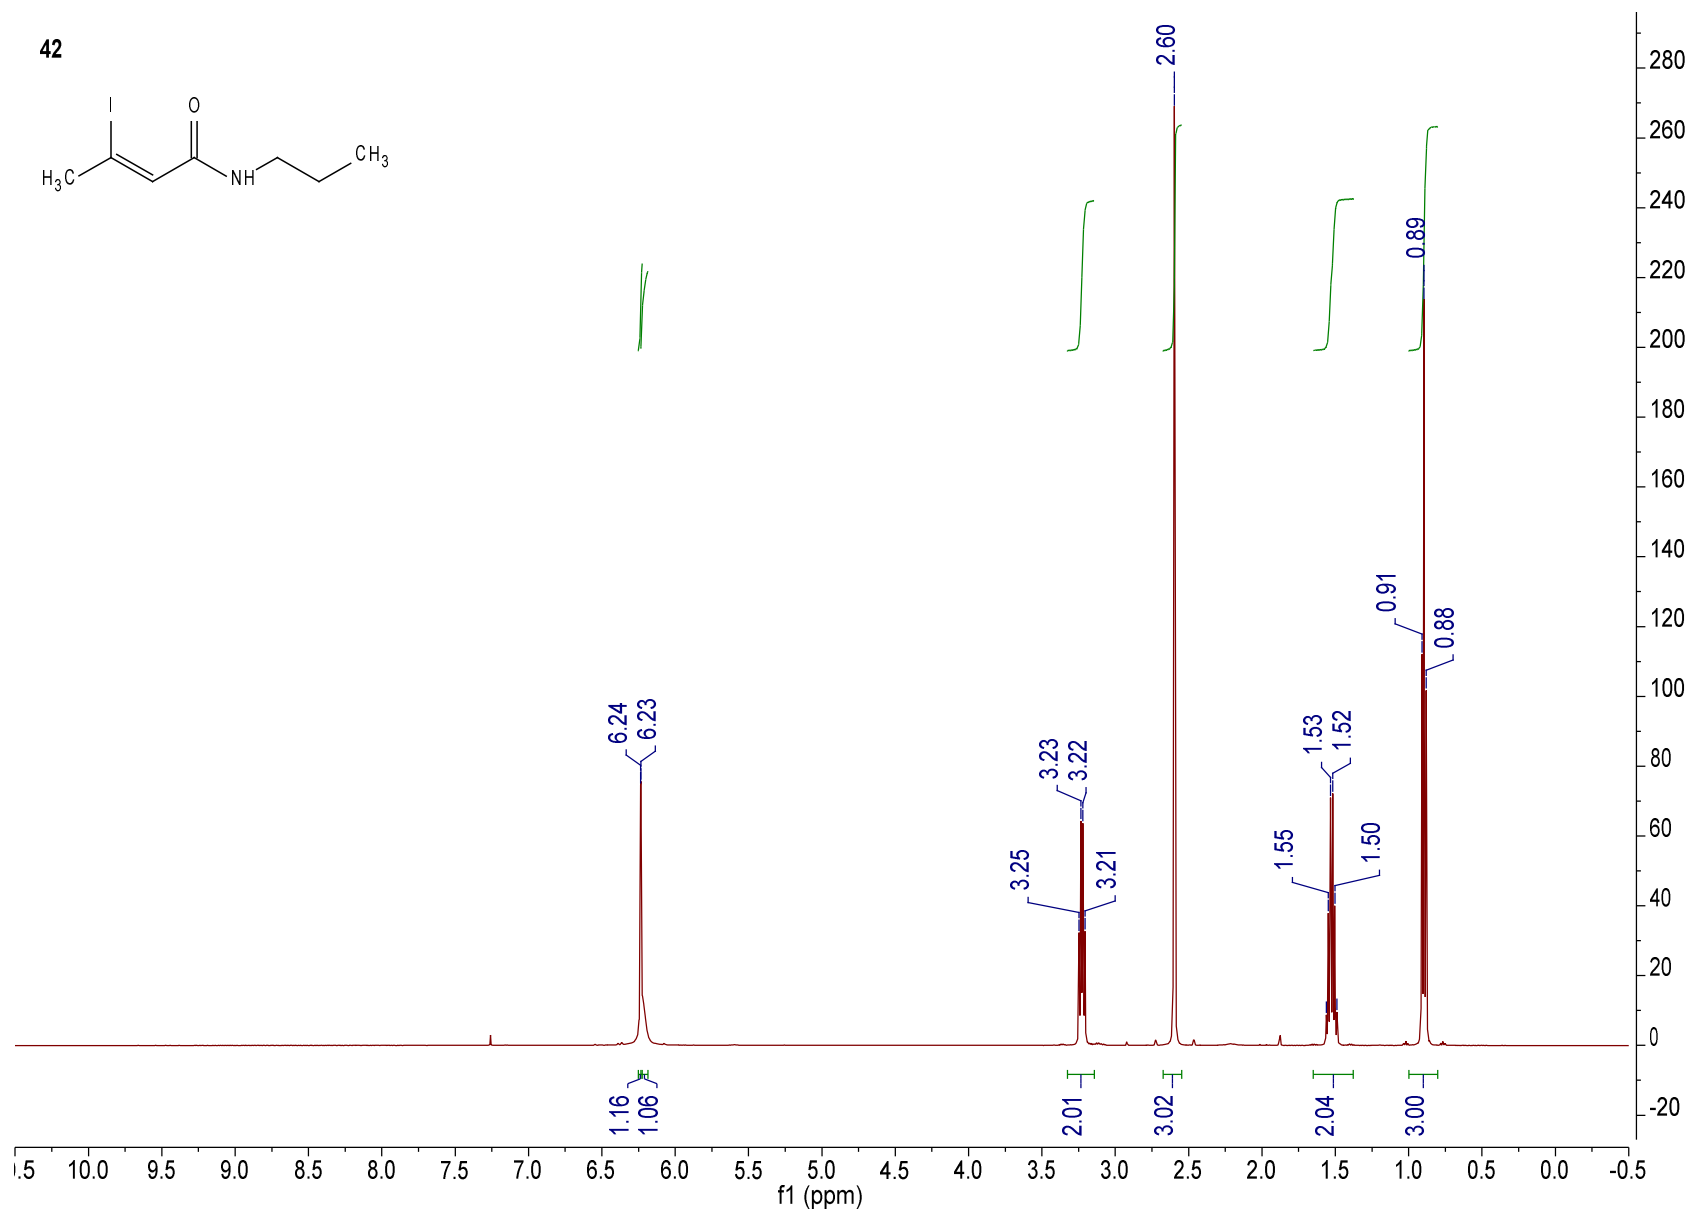

42

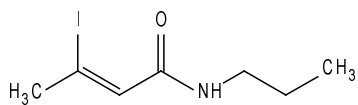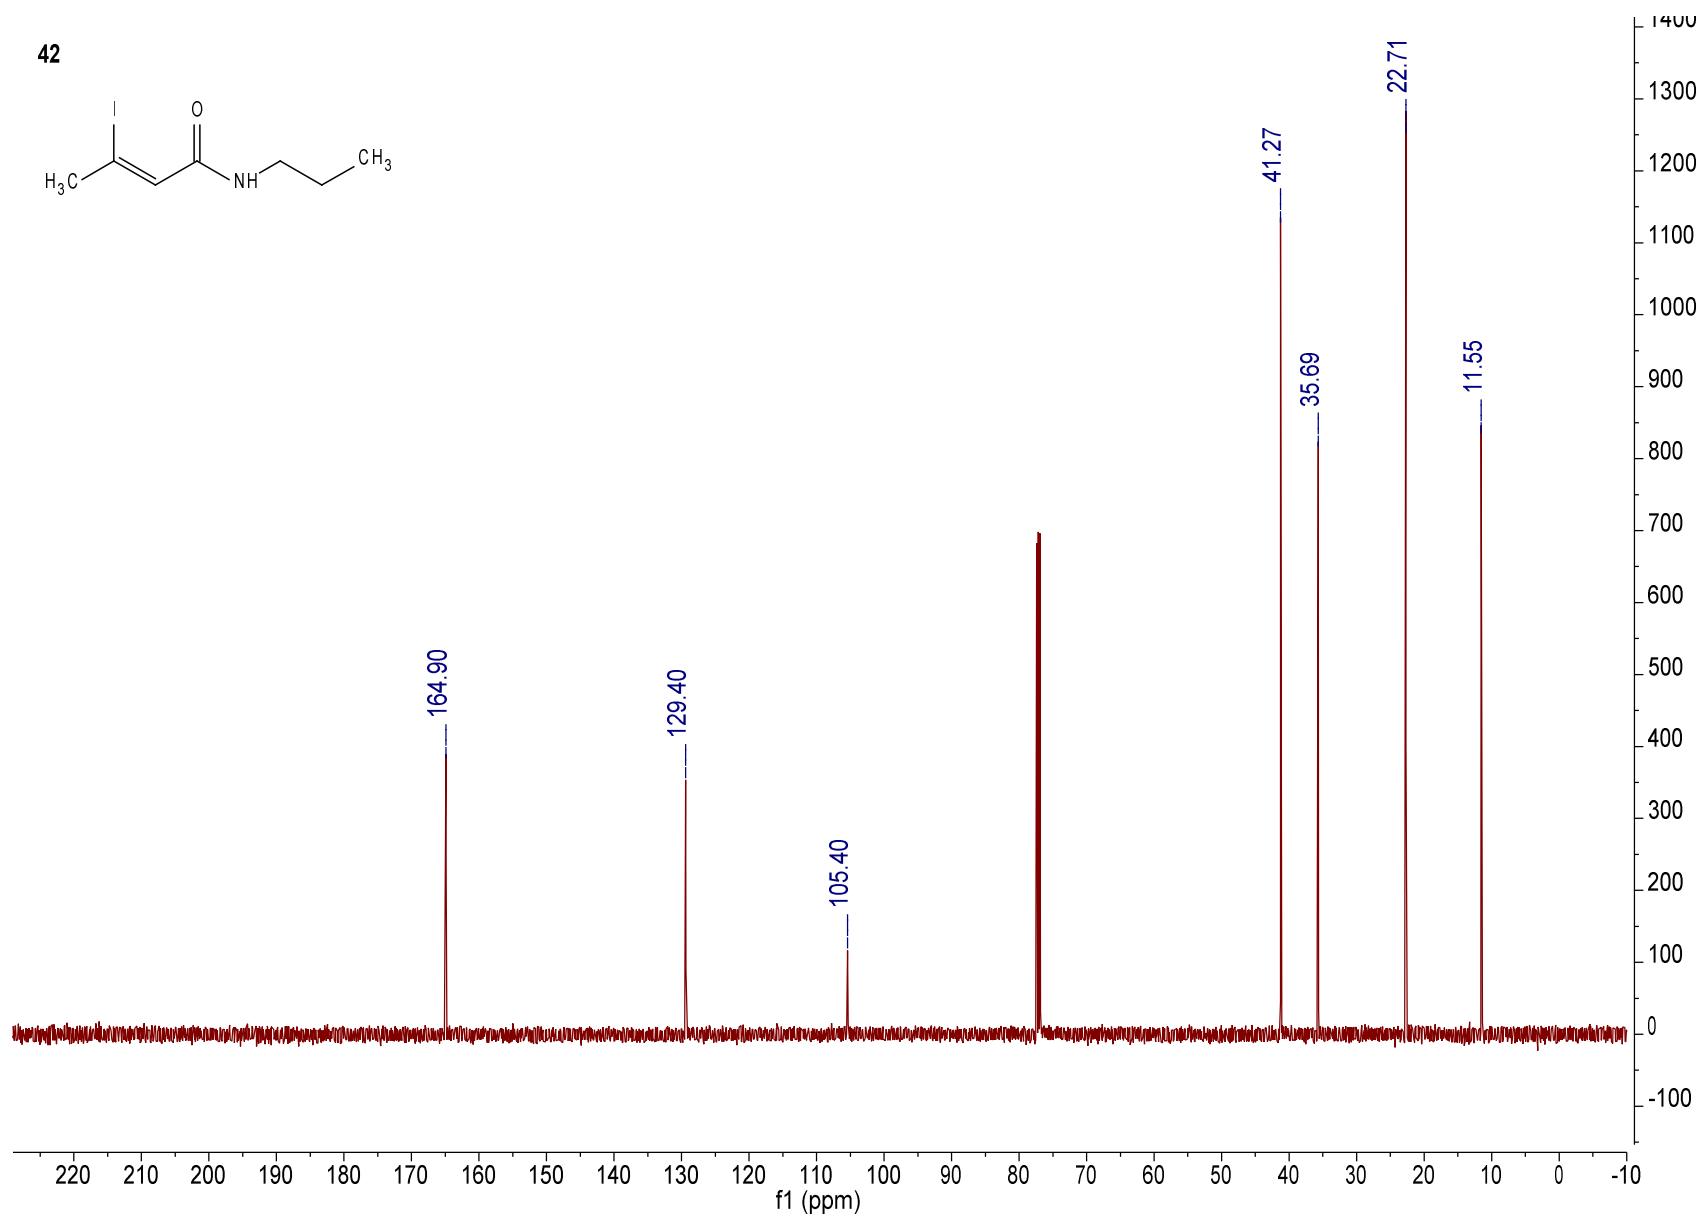

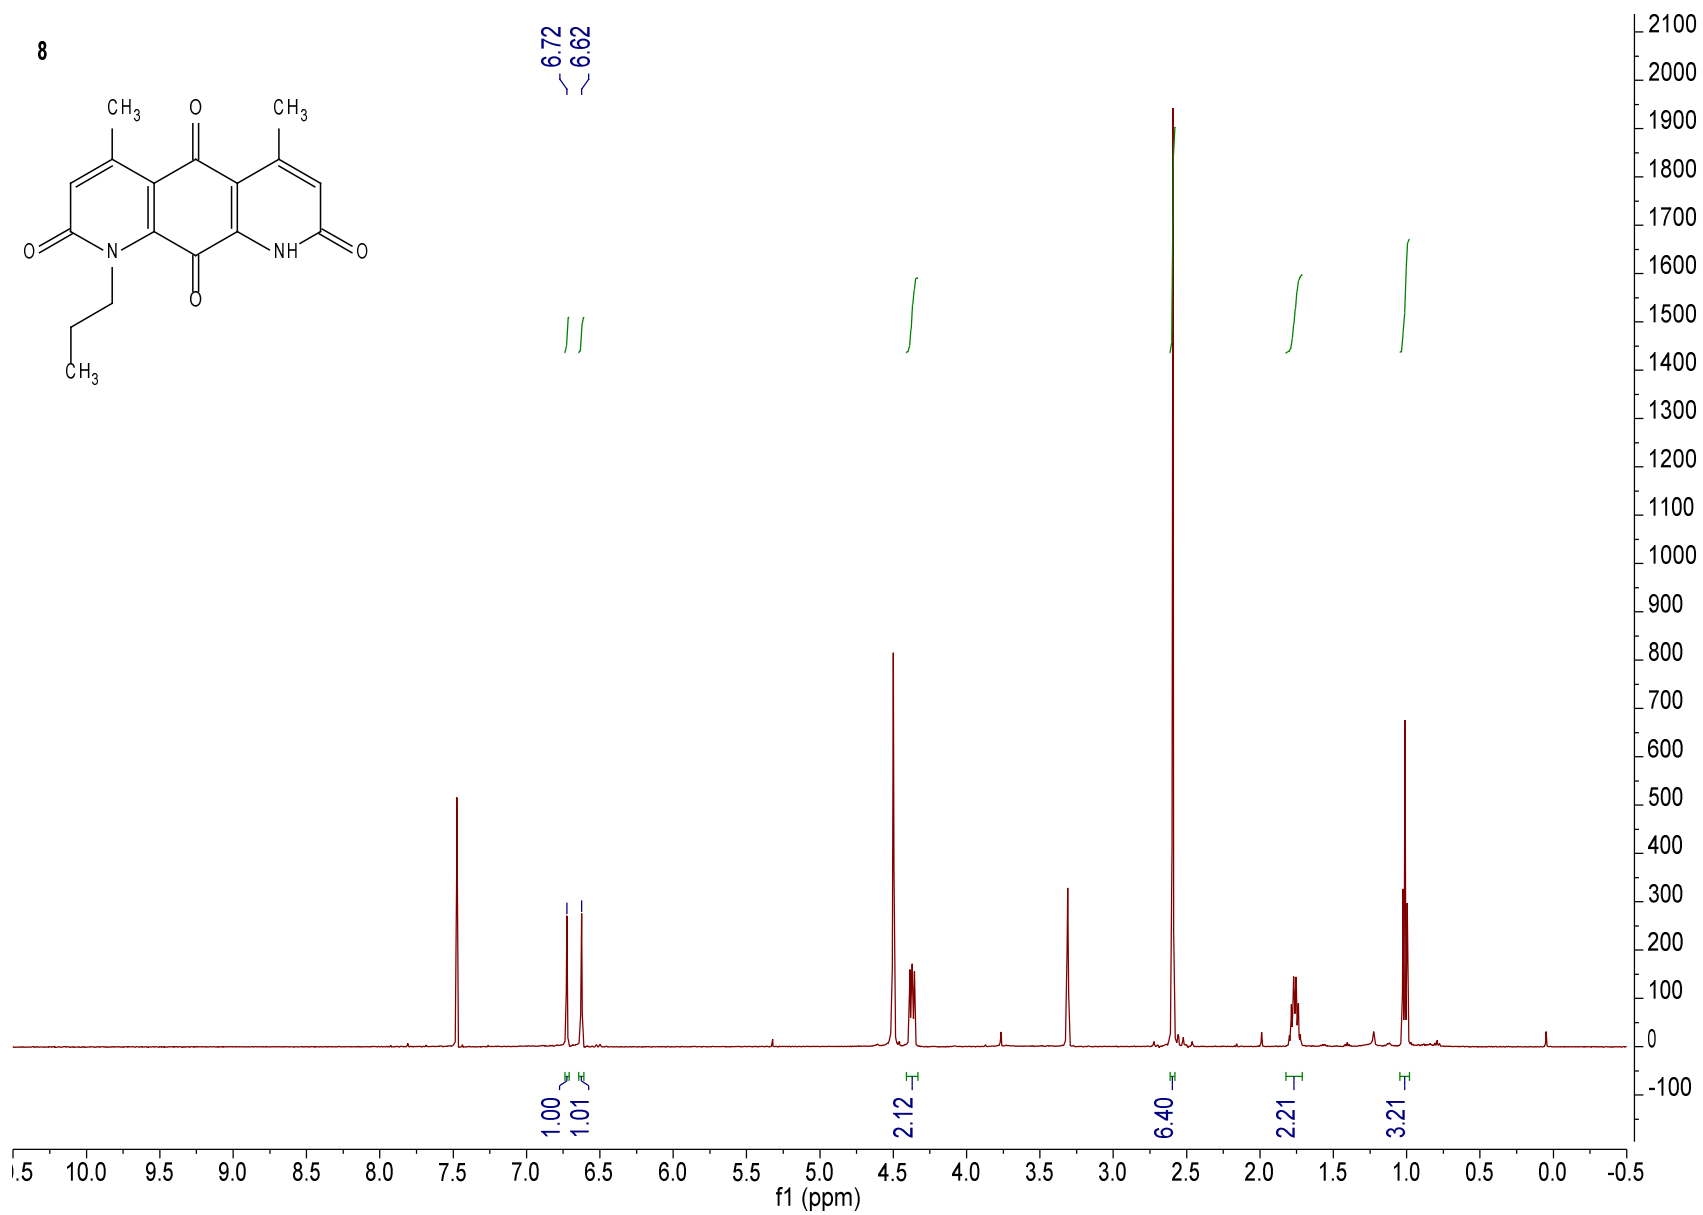

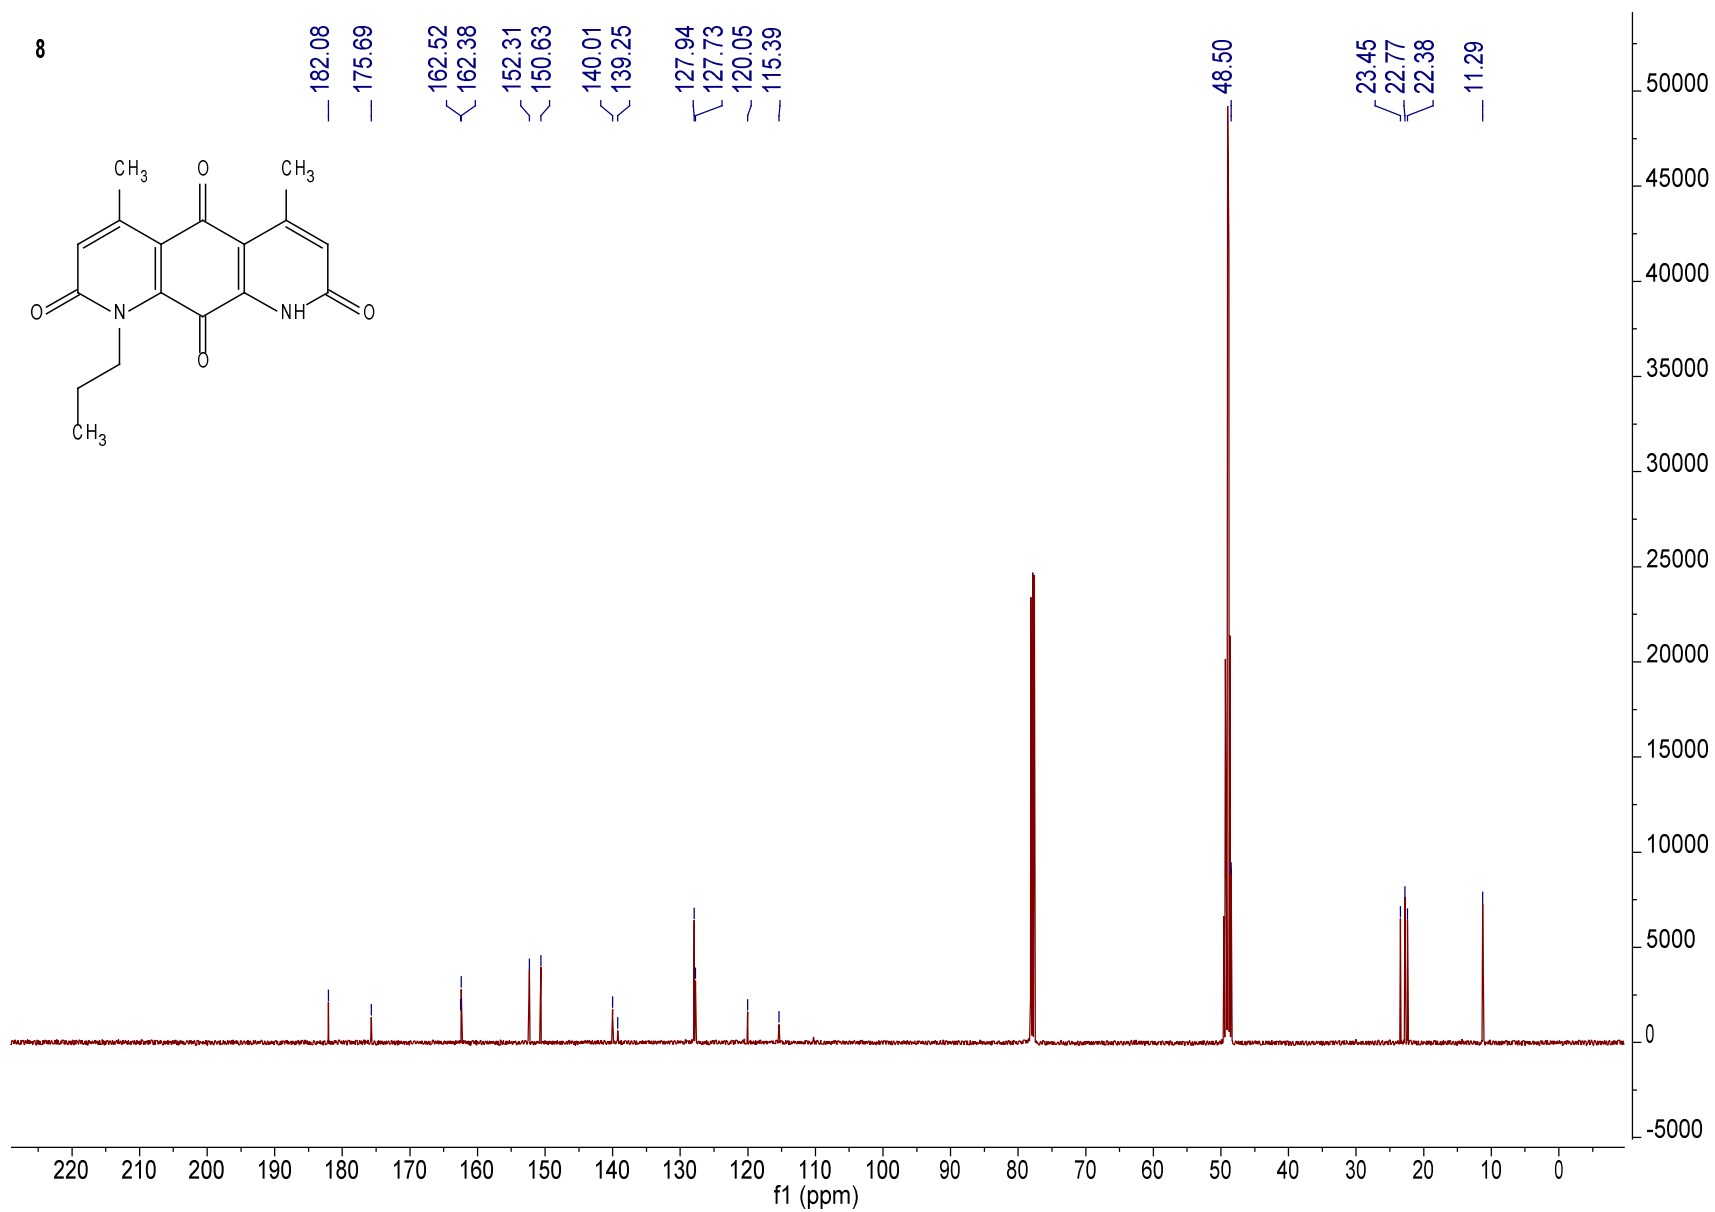

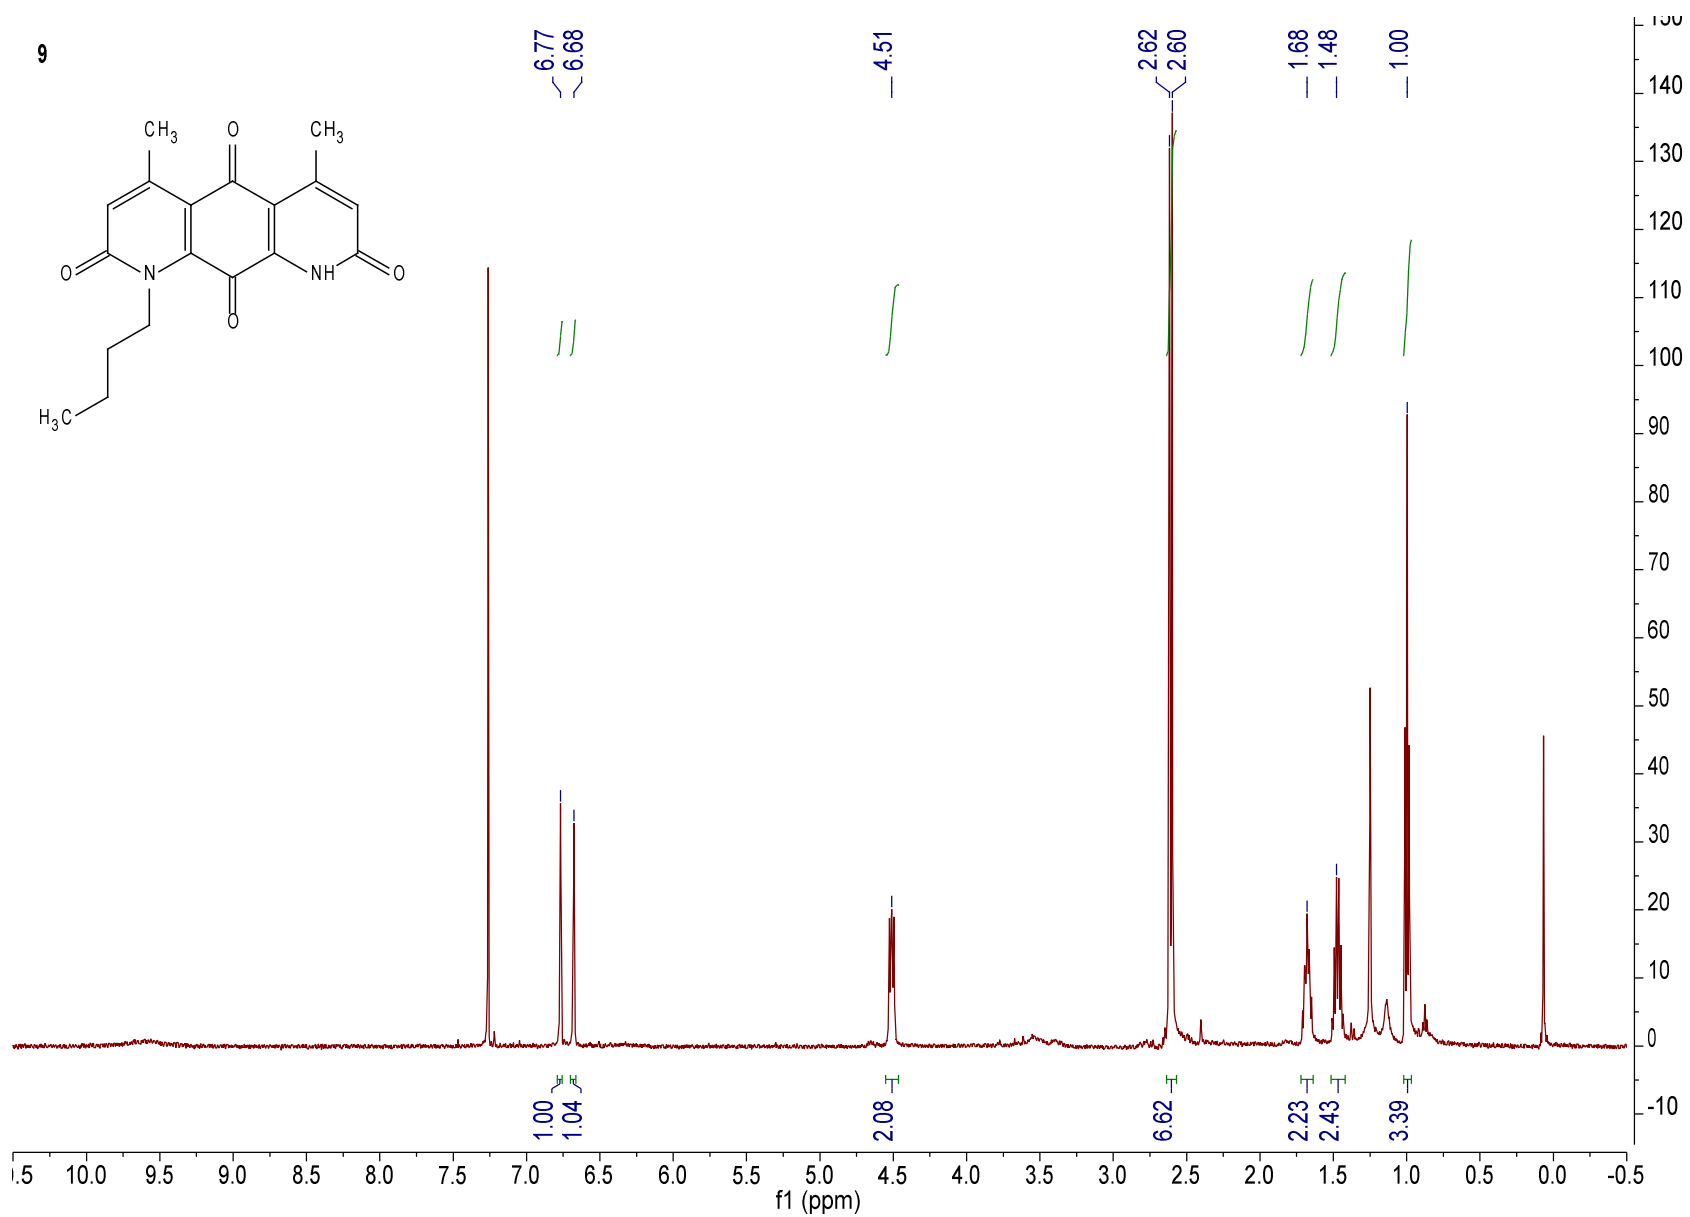

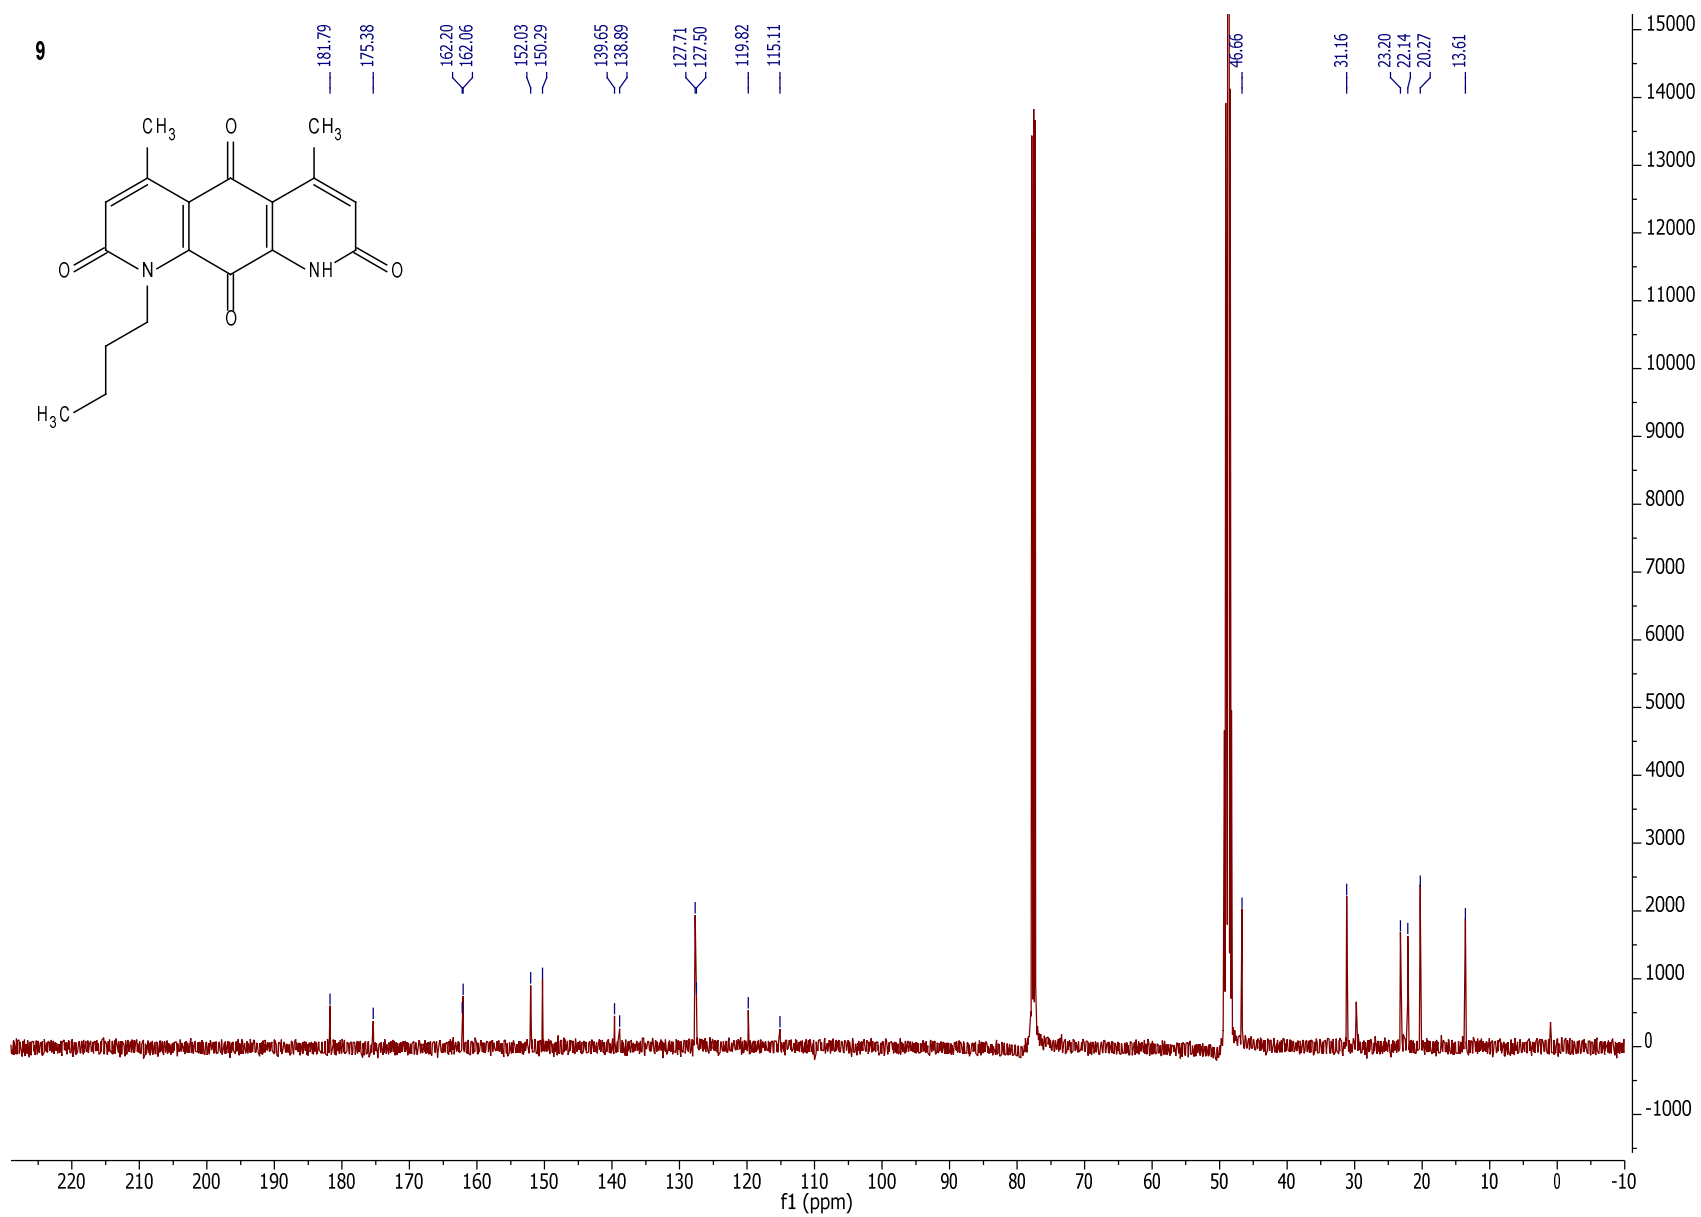

43

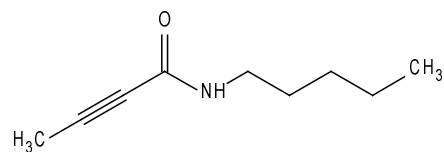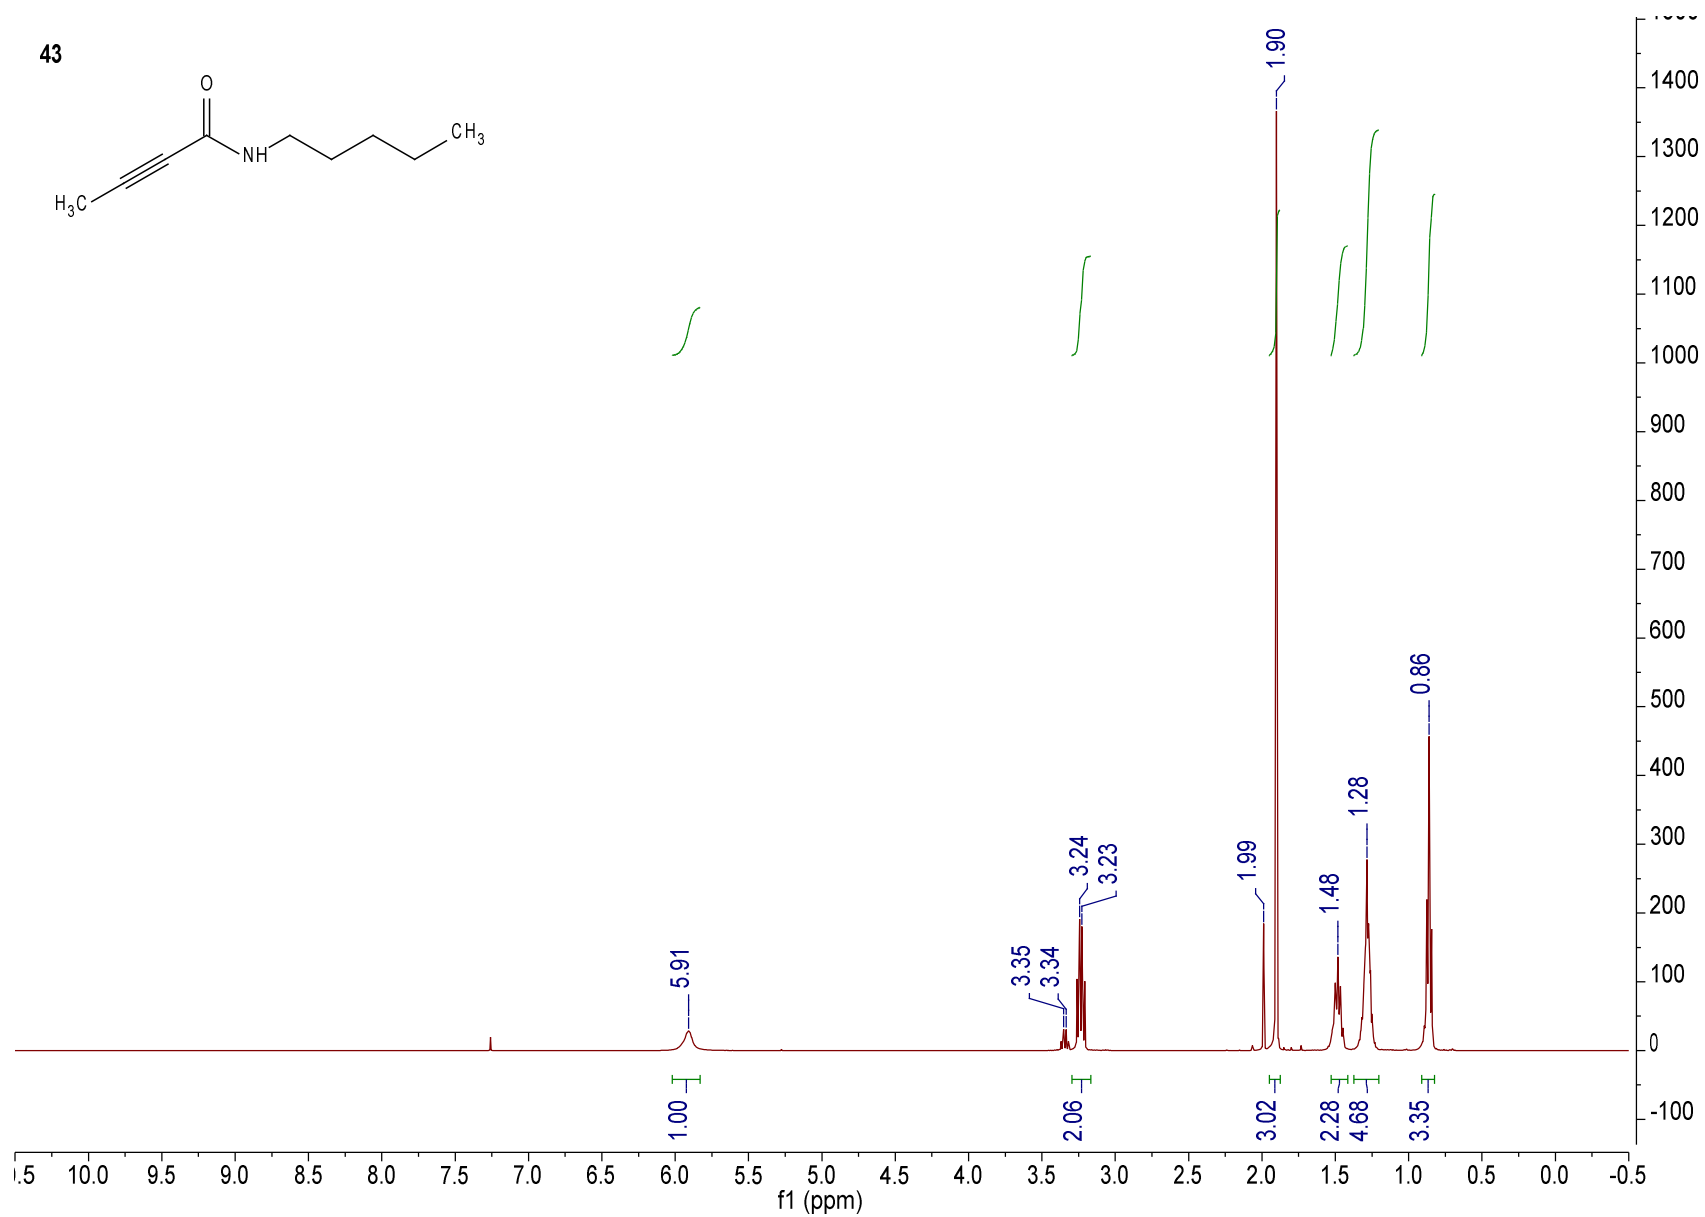

43

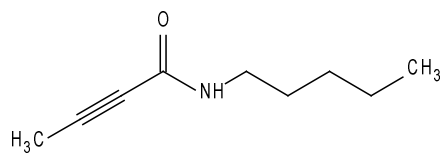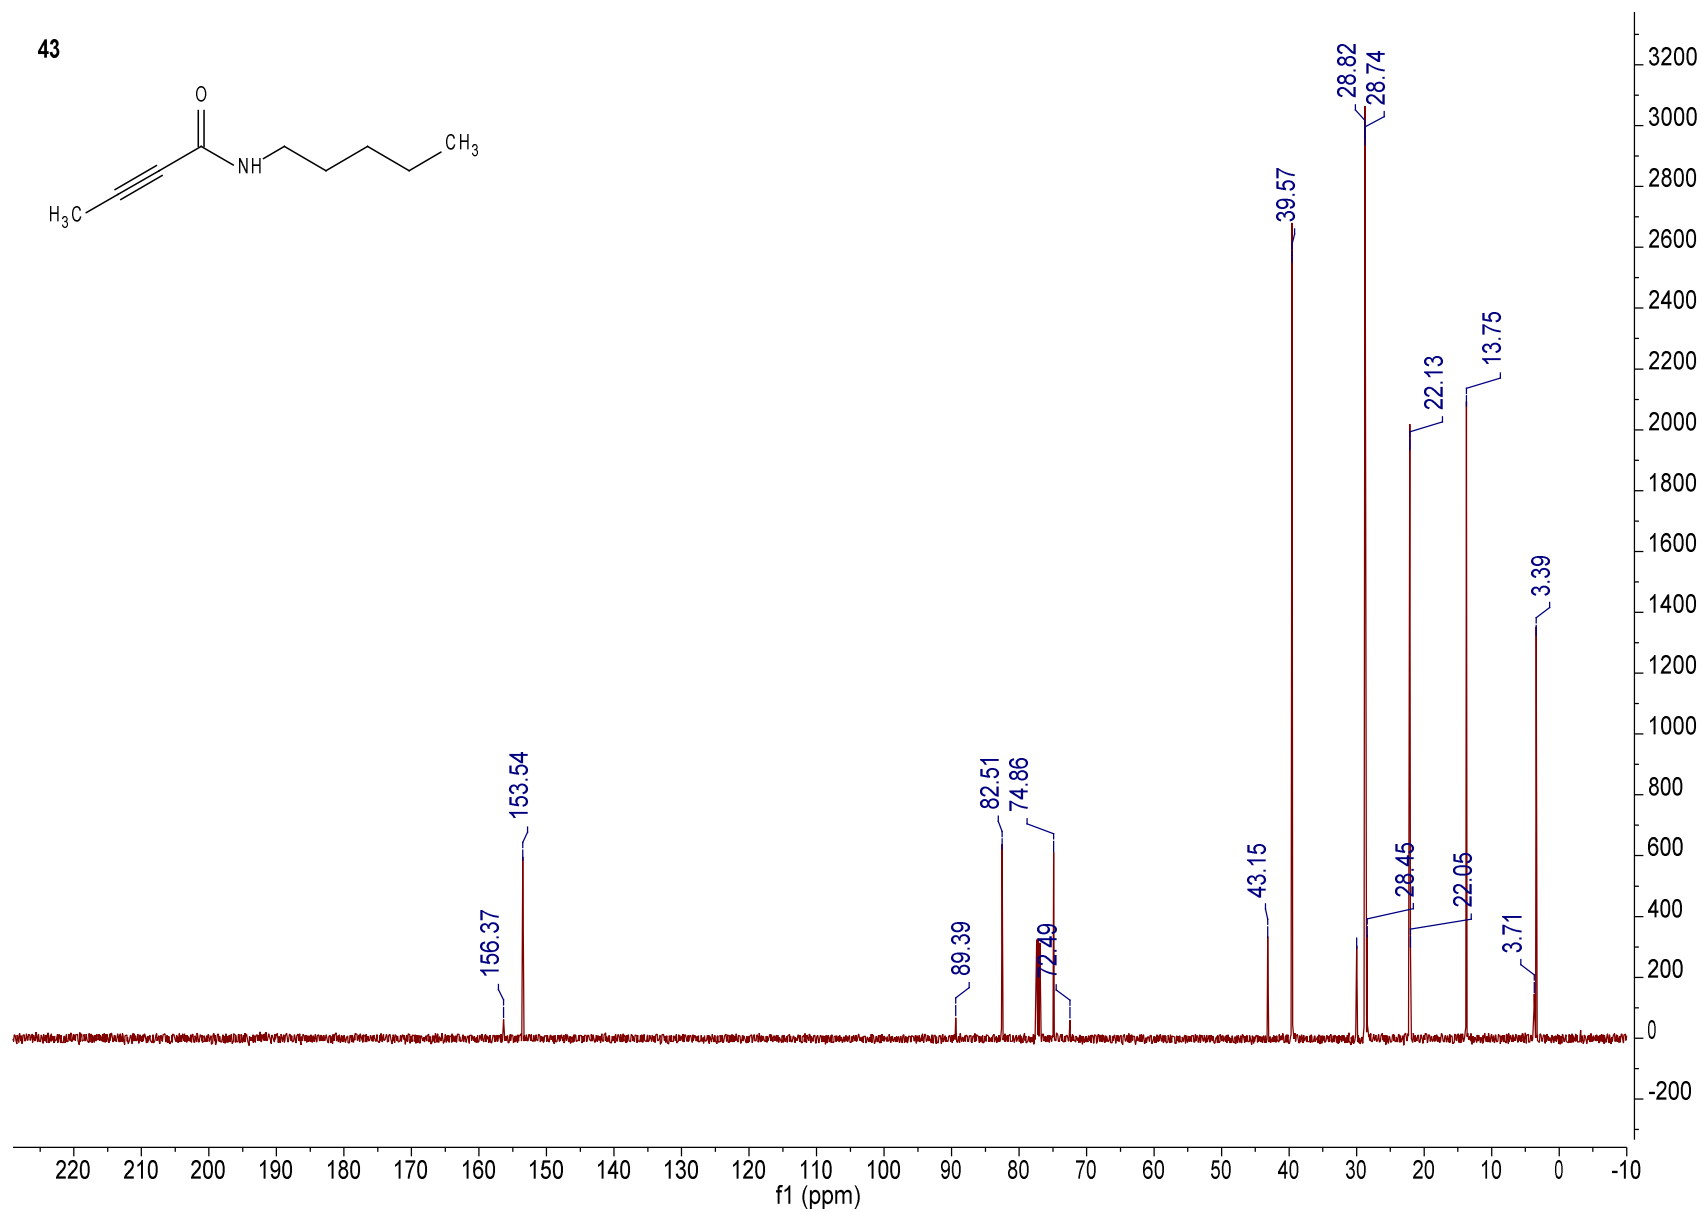



44

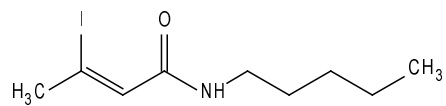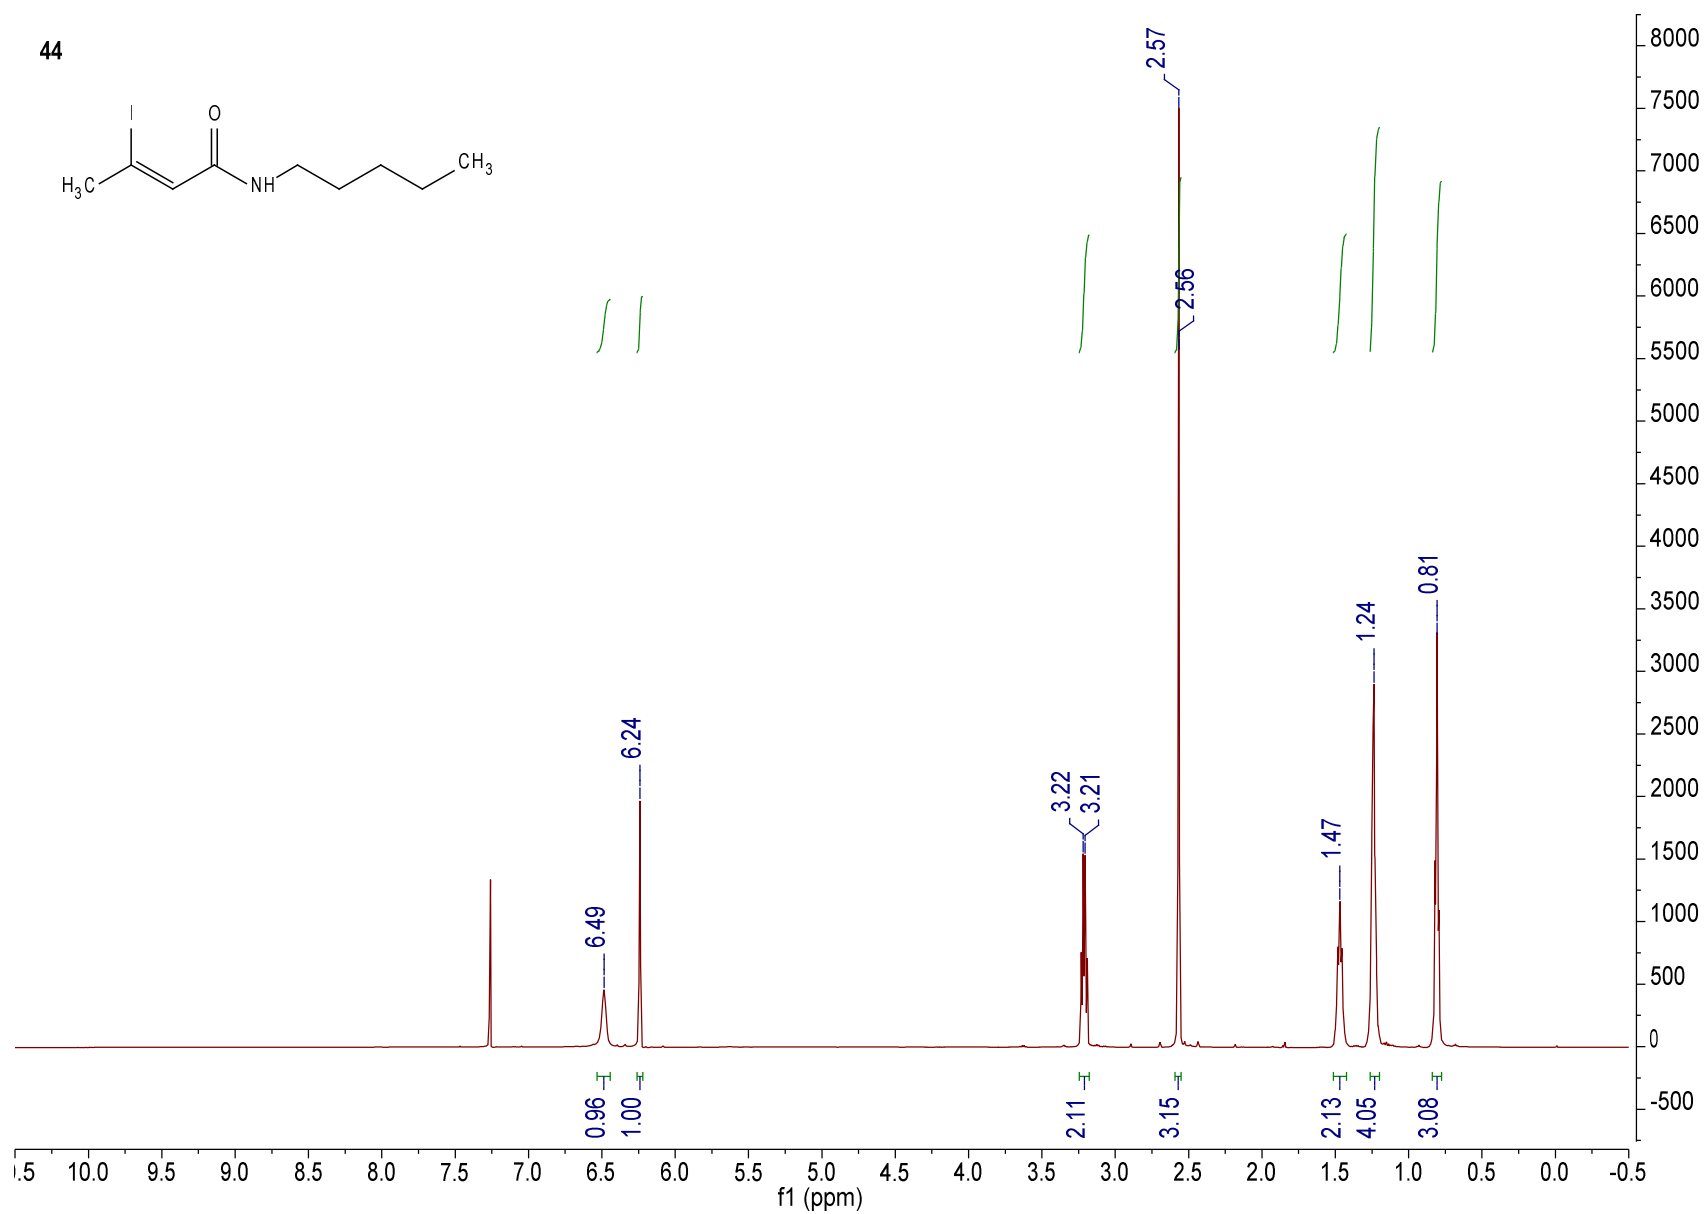

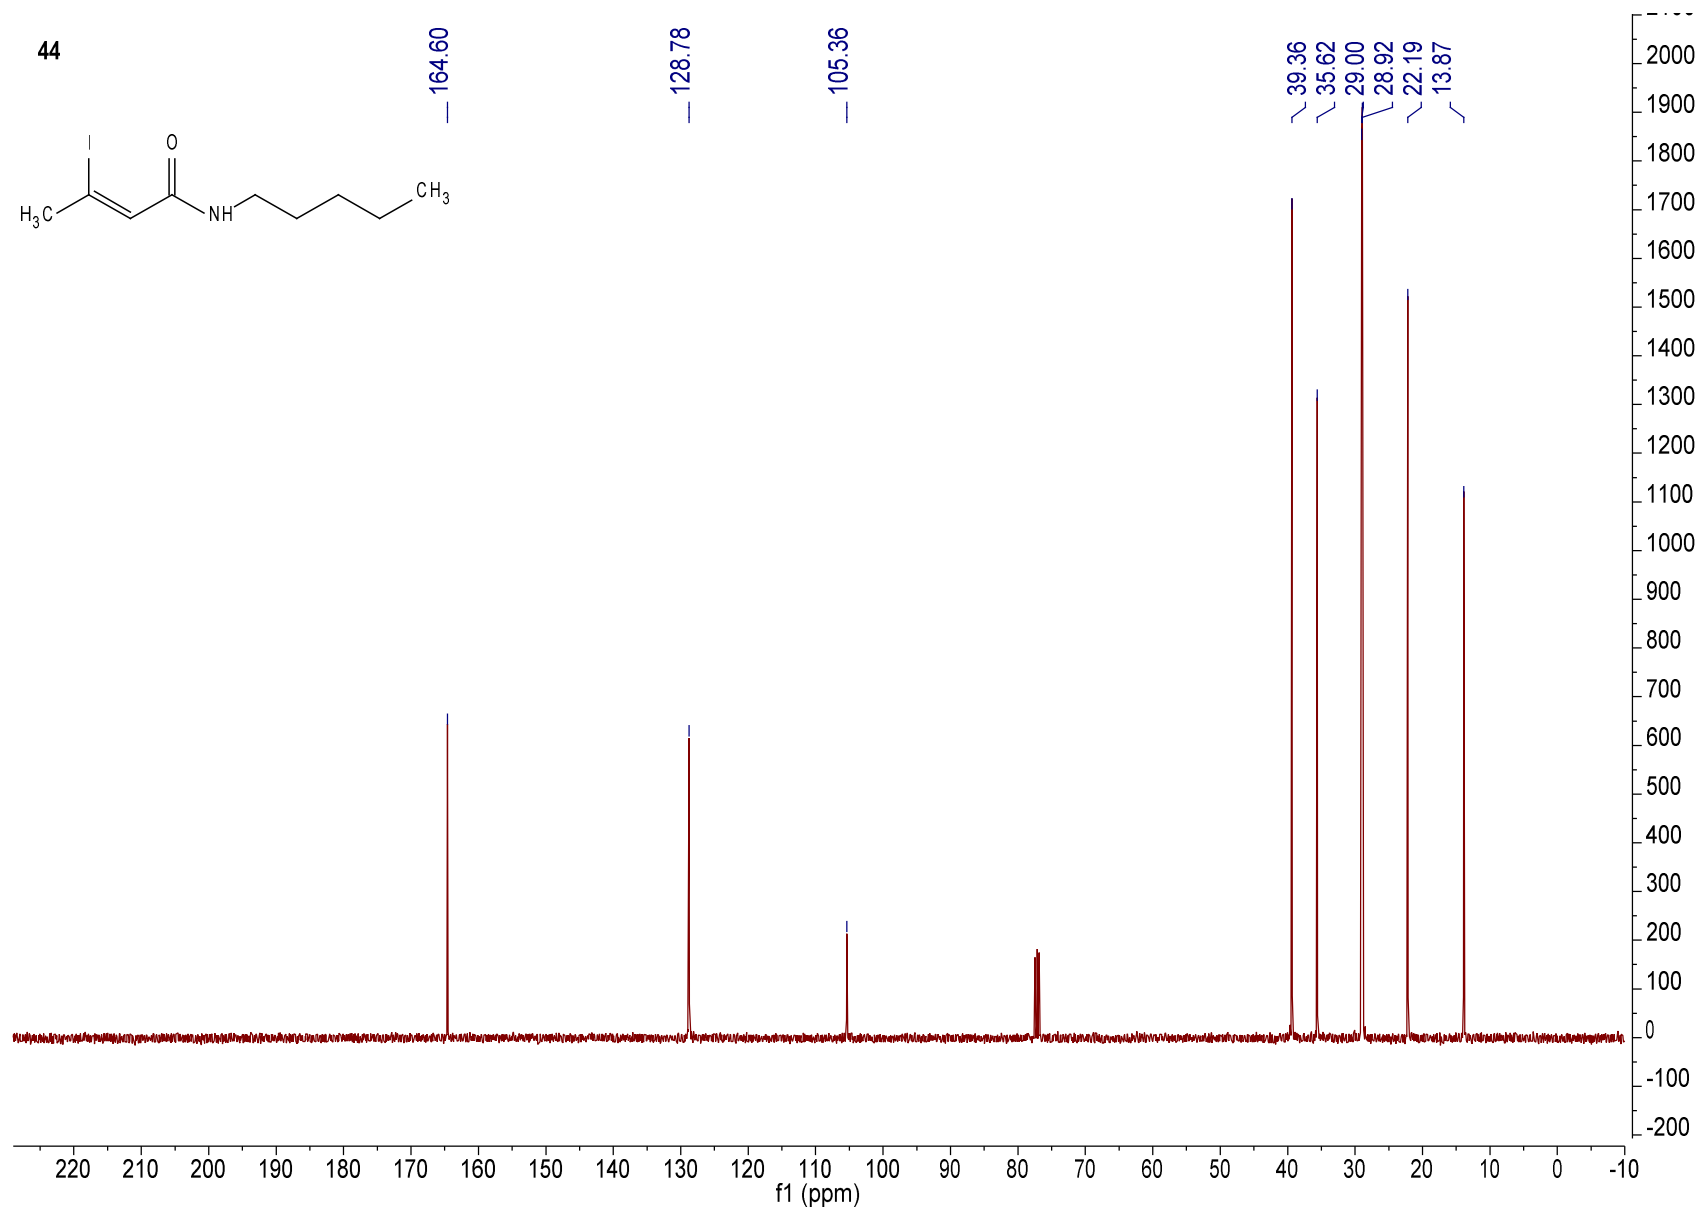

10

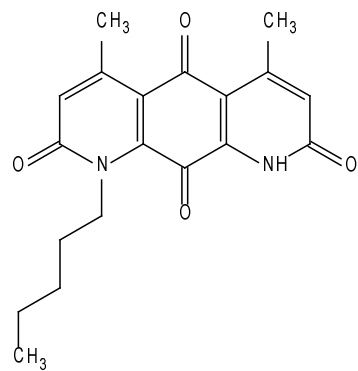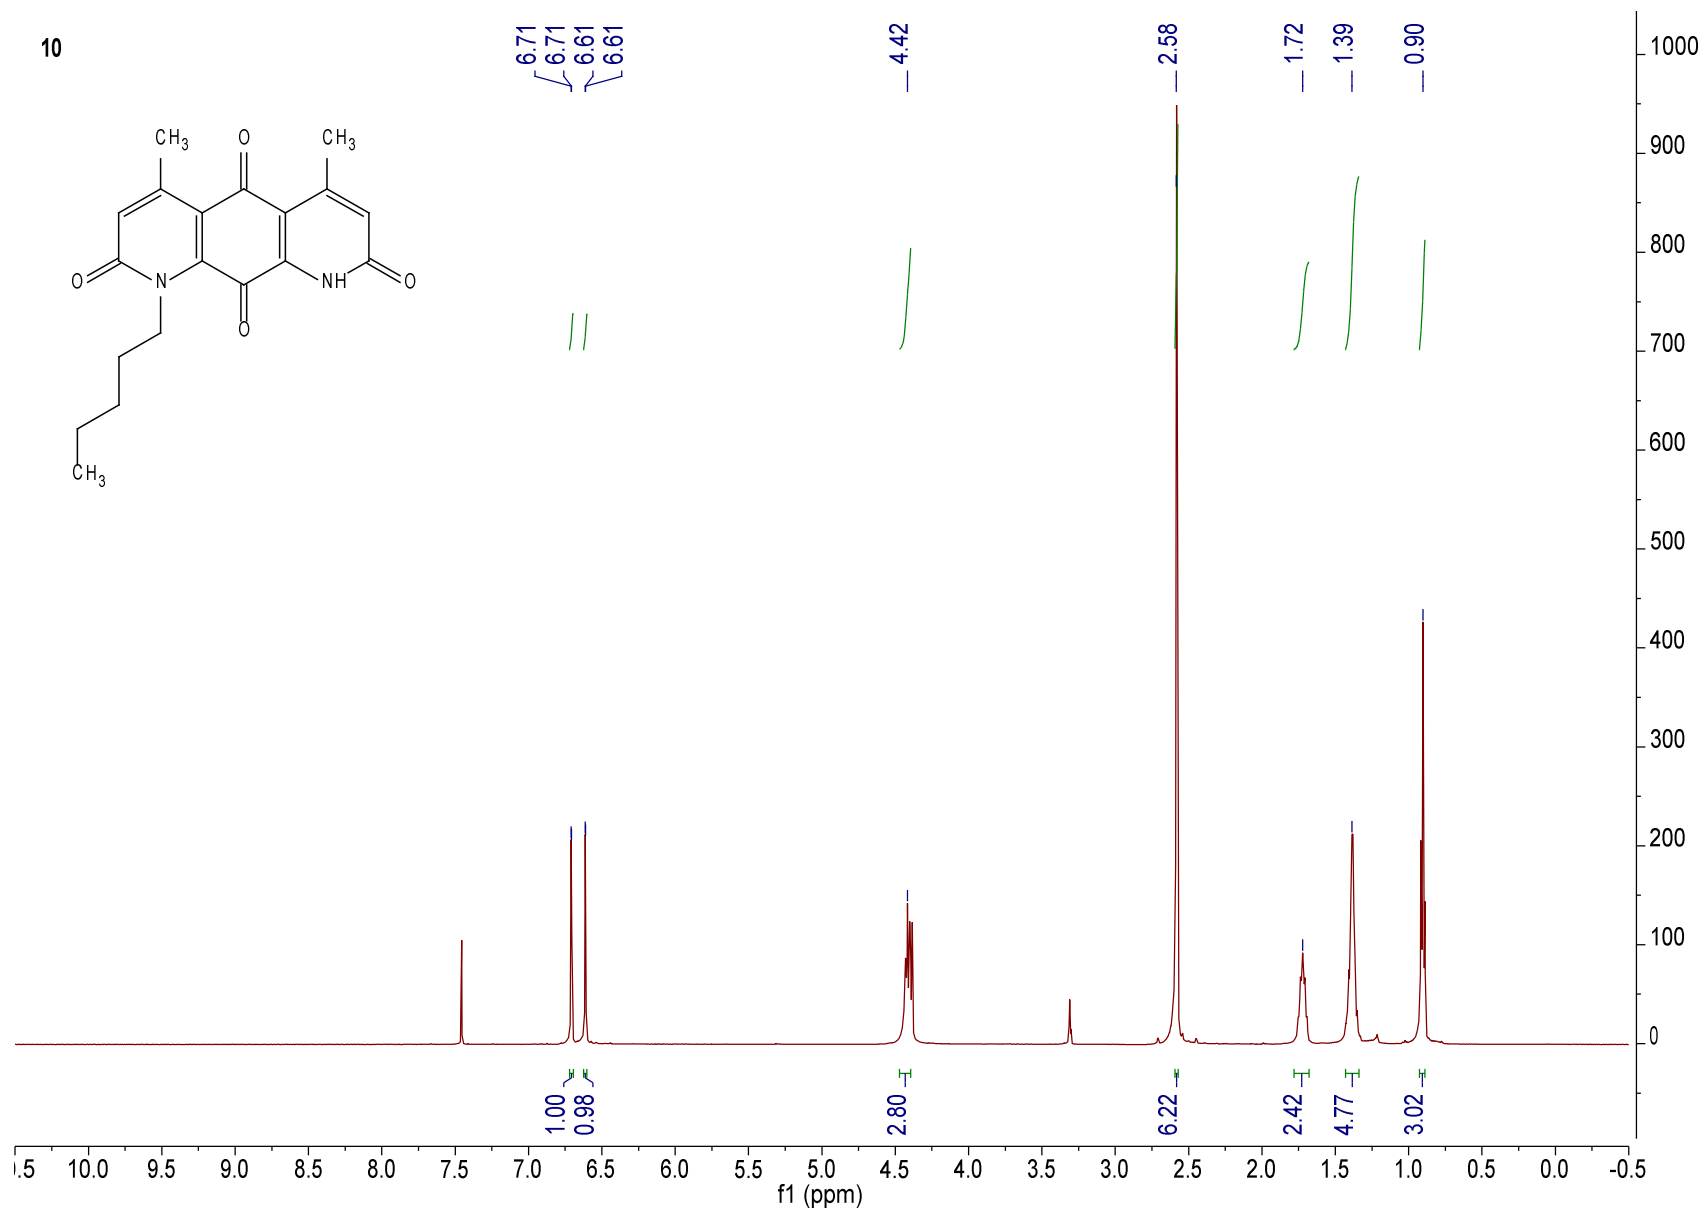

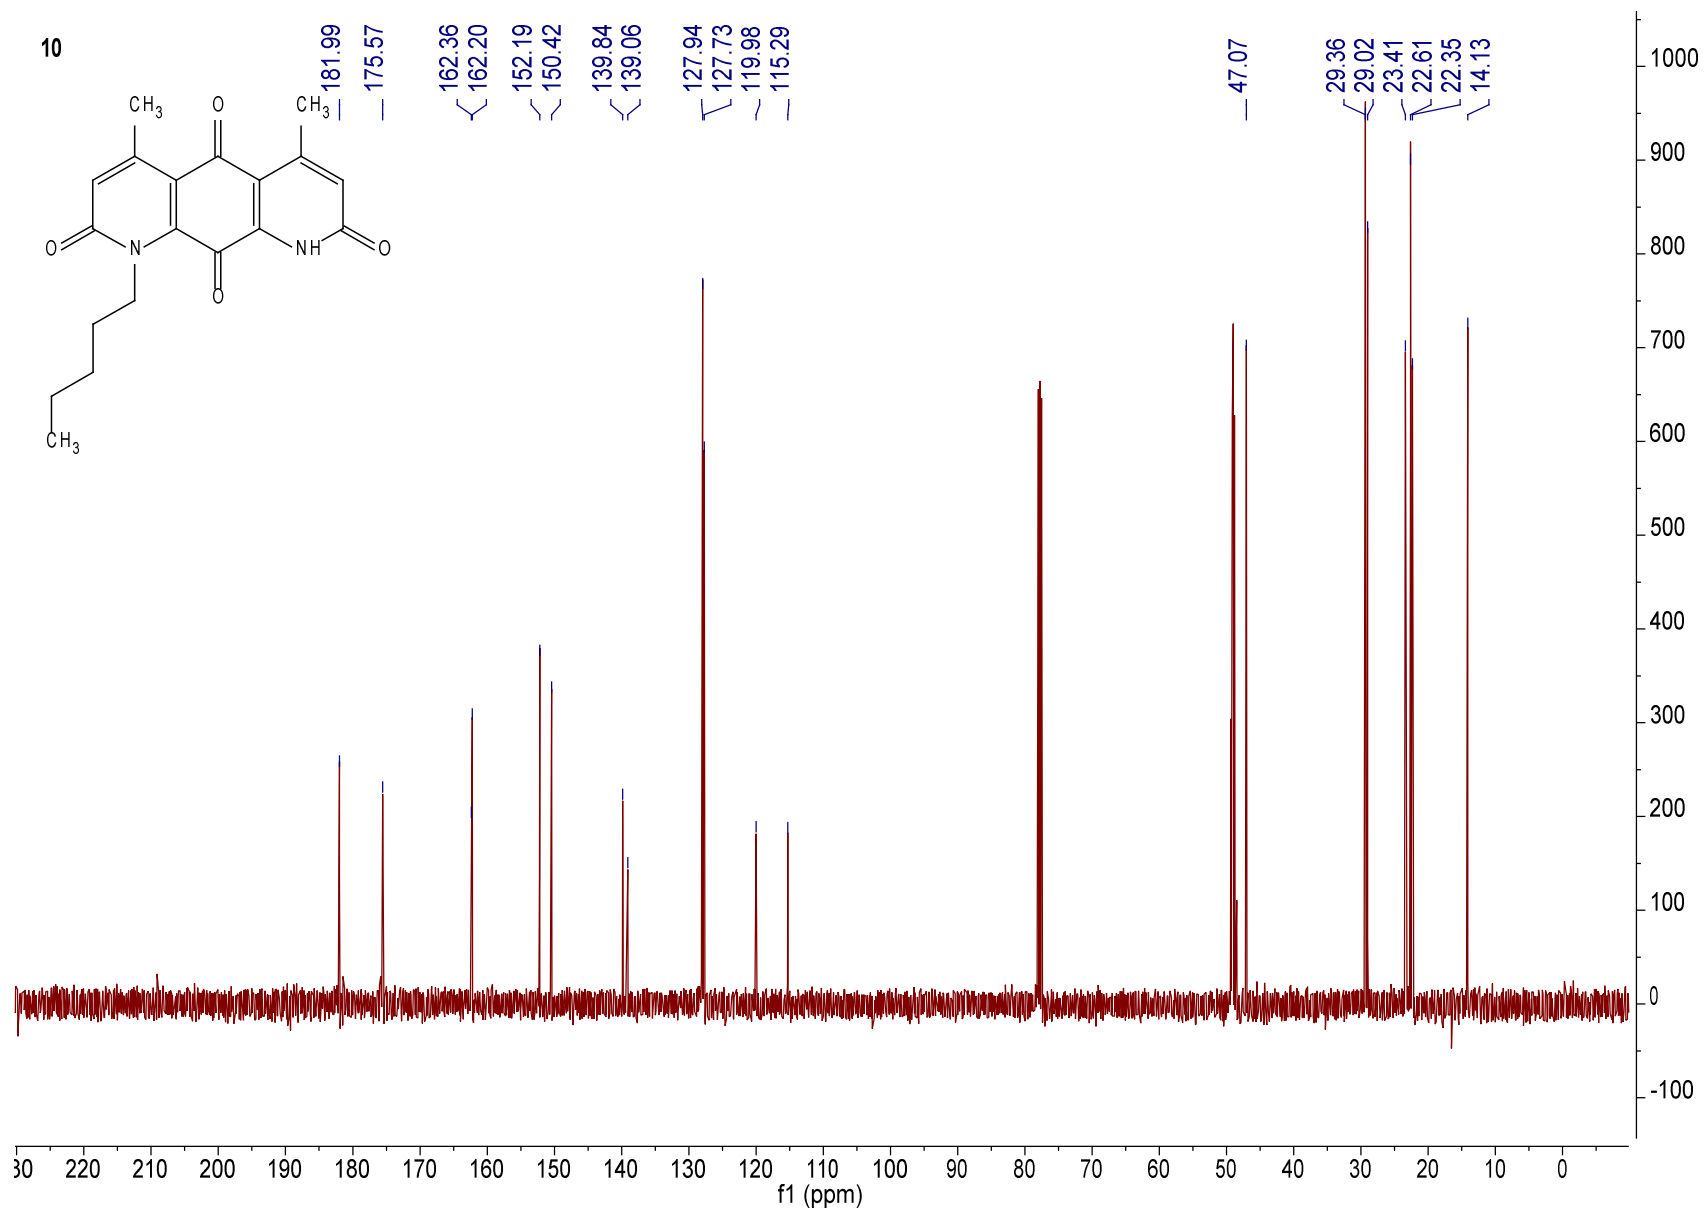

45

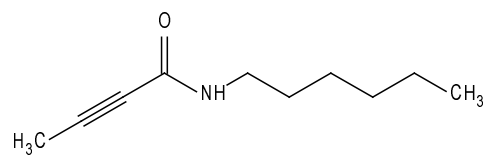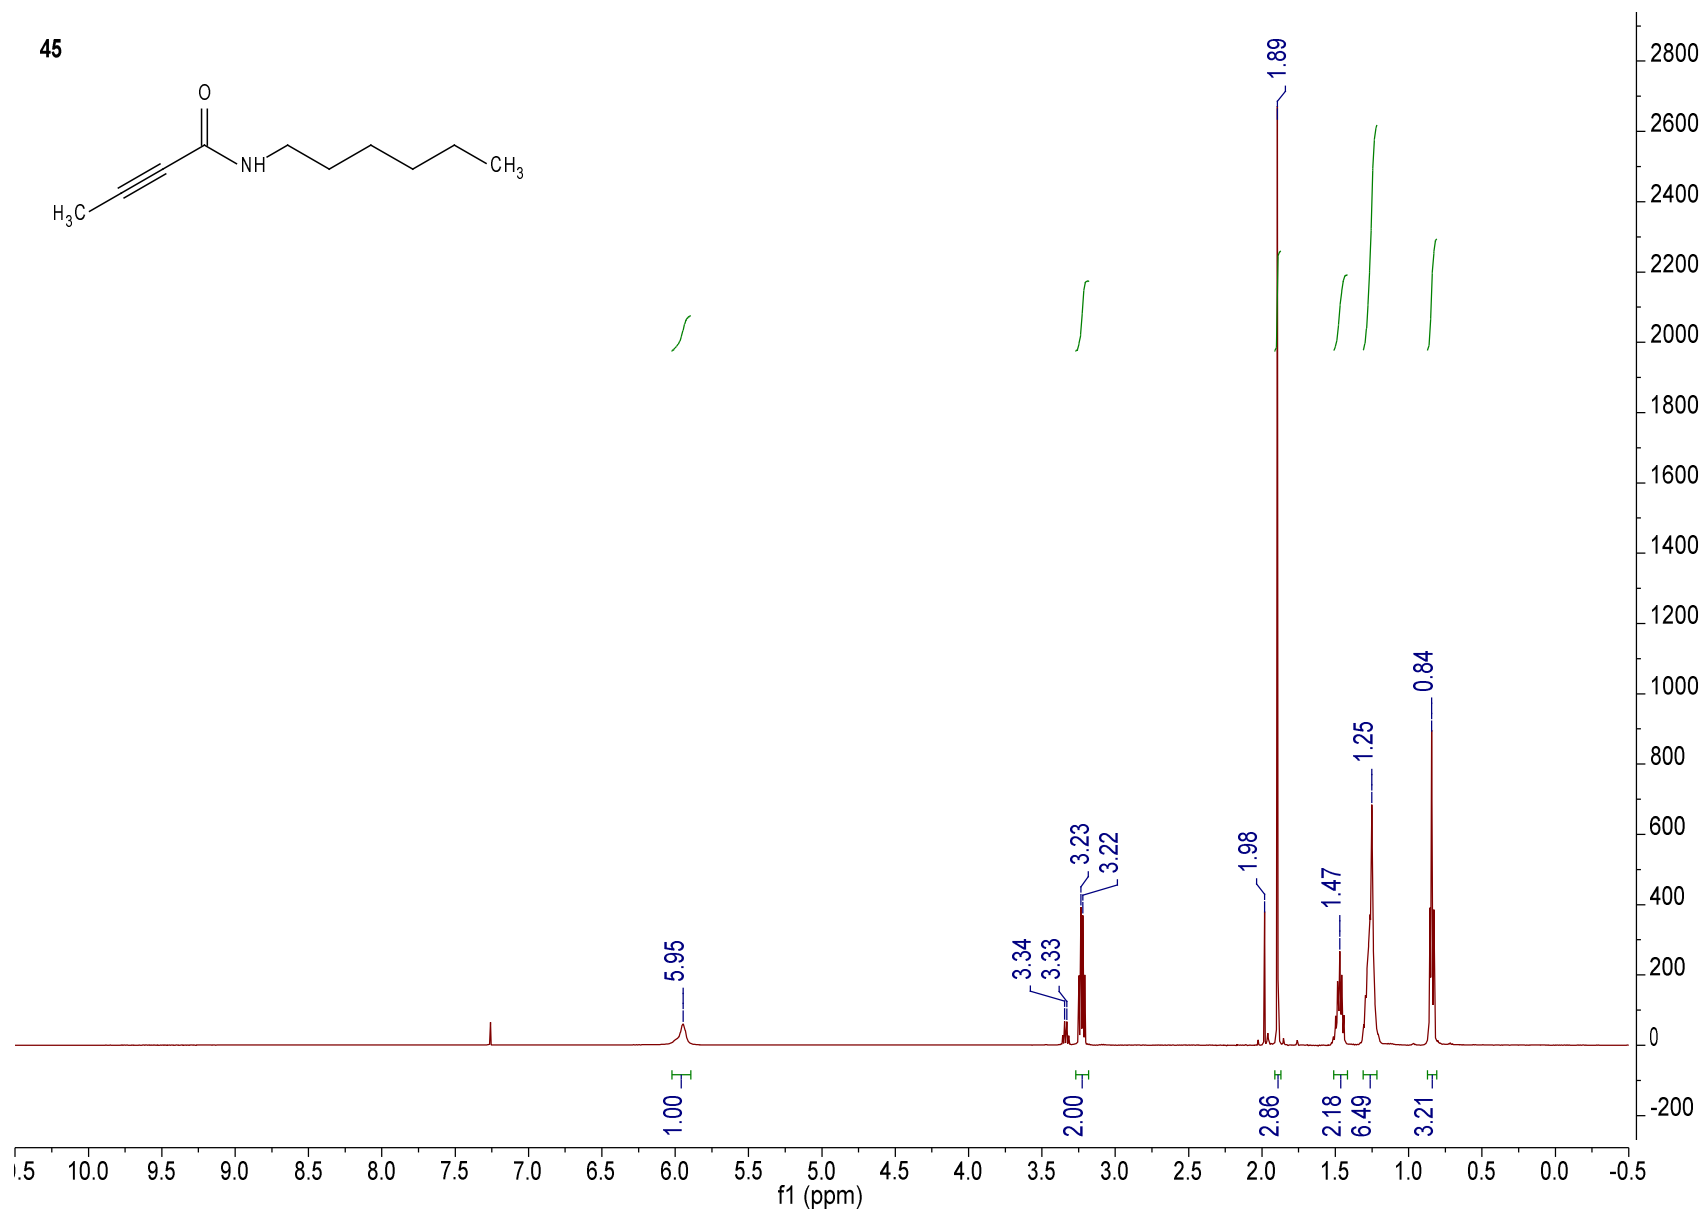

45

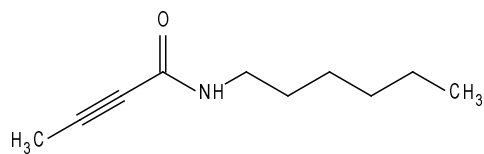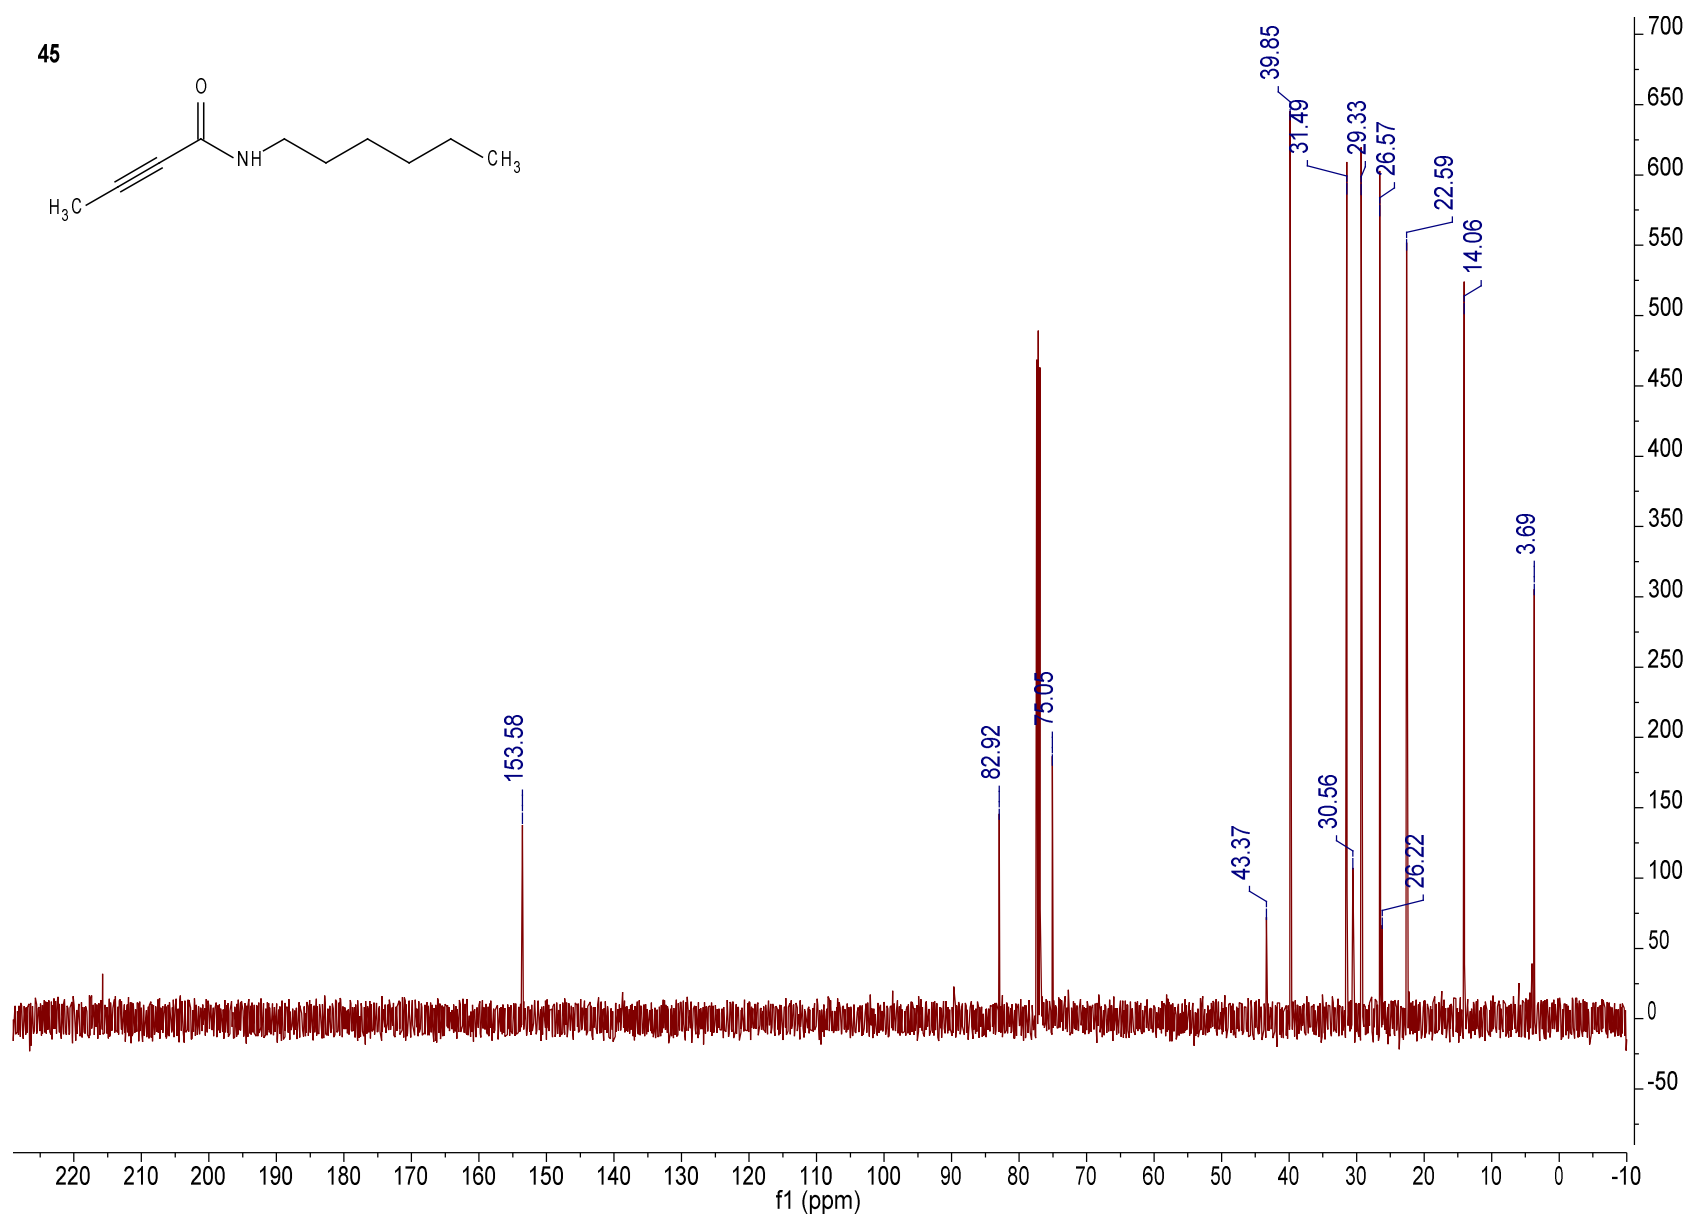

46

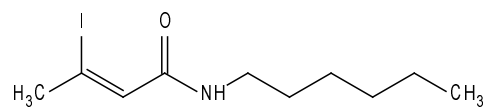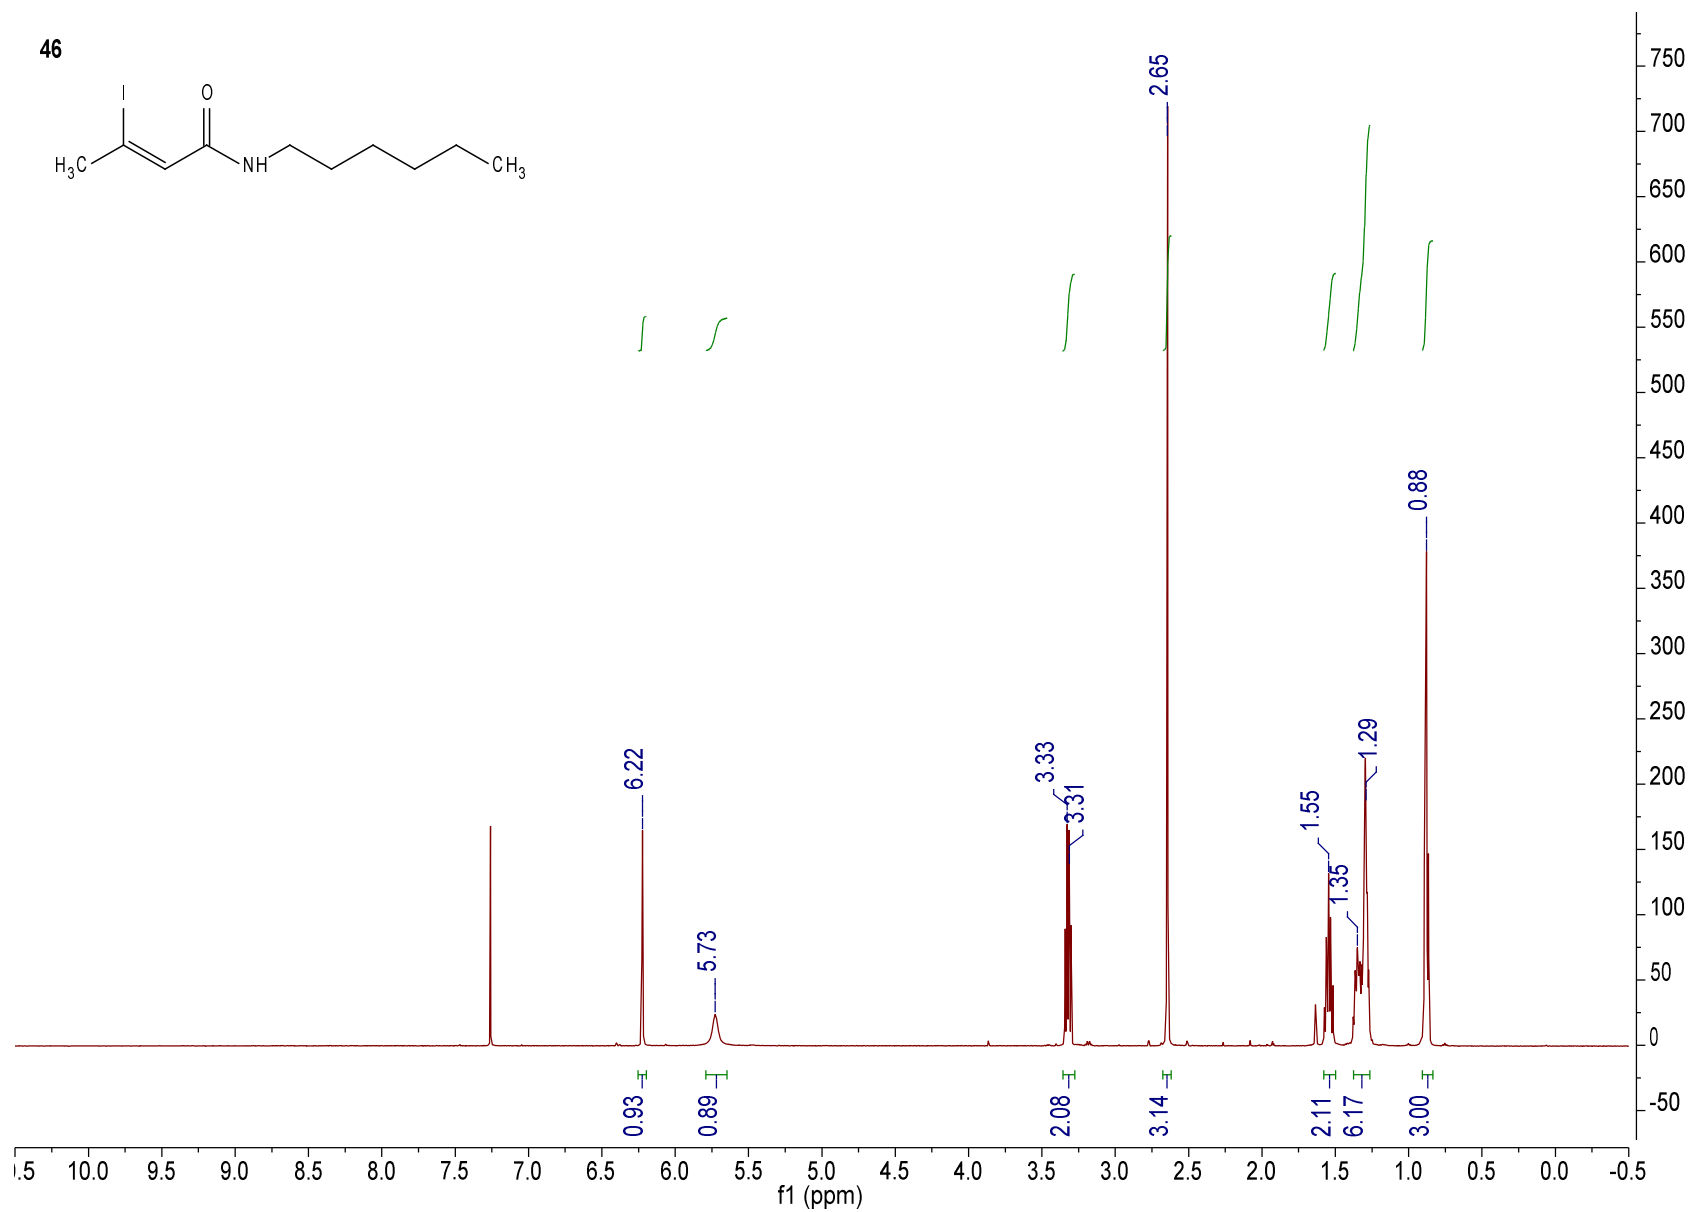

46

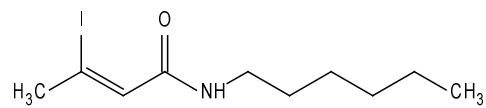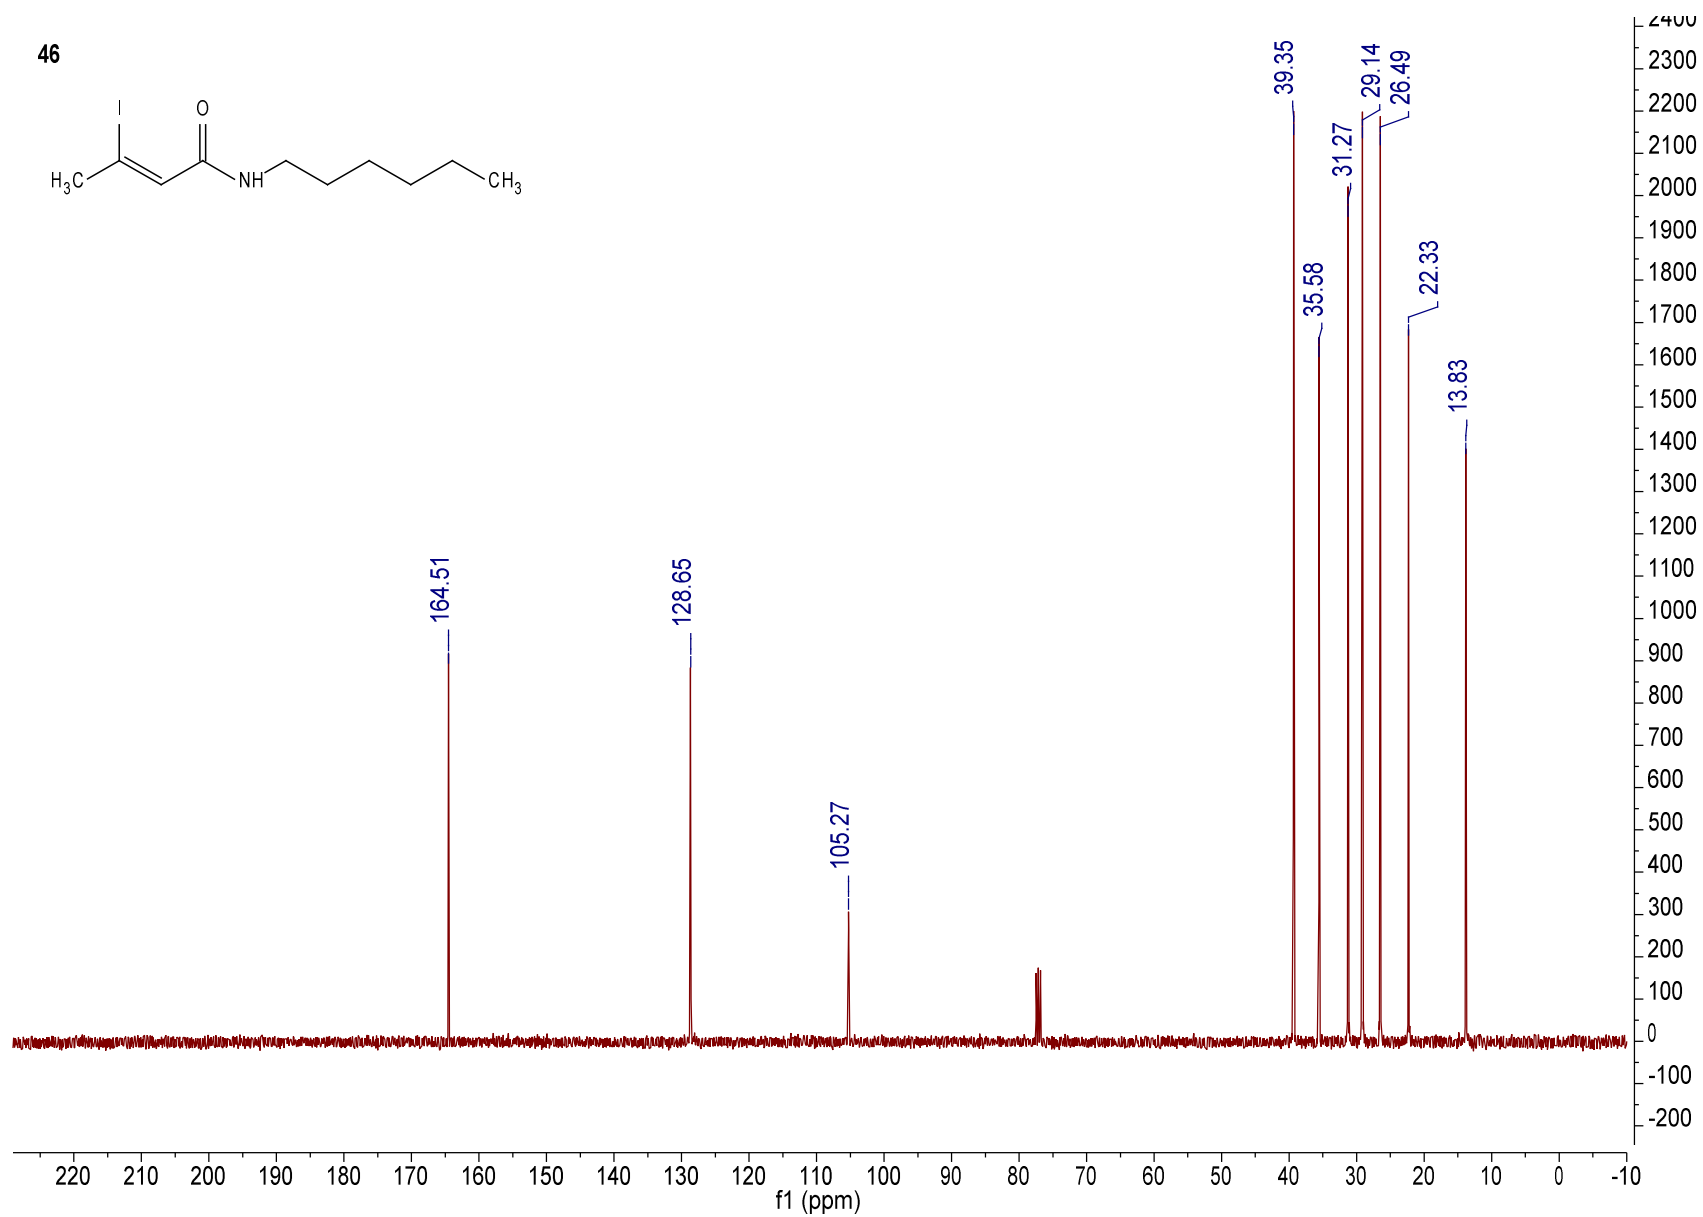



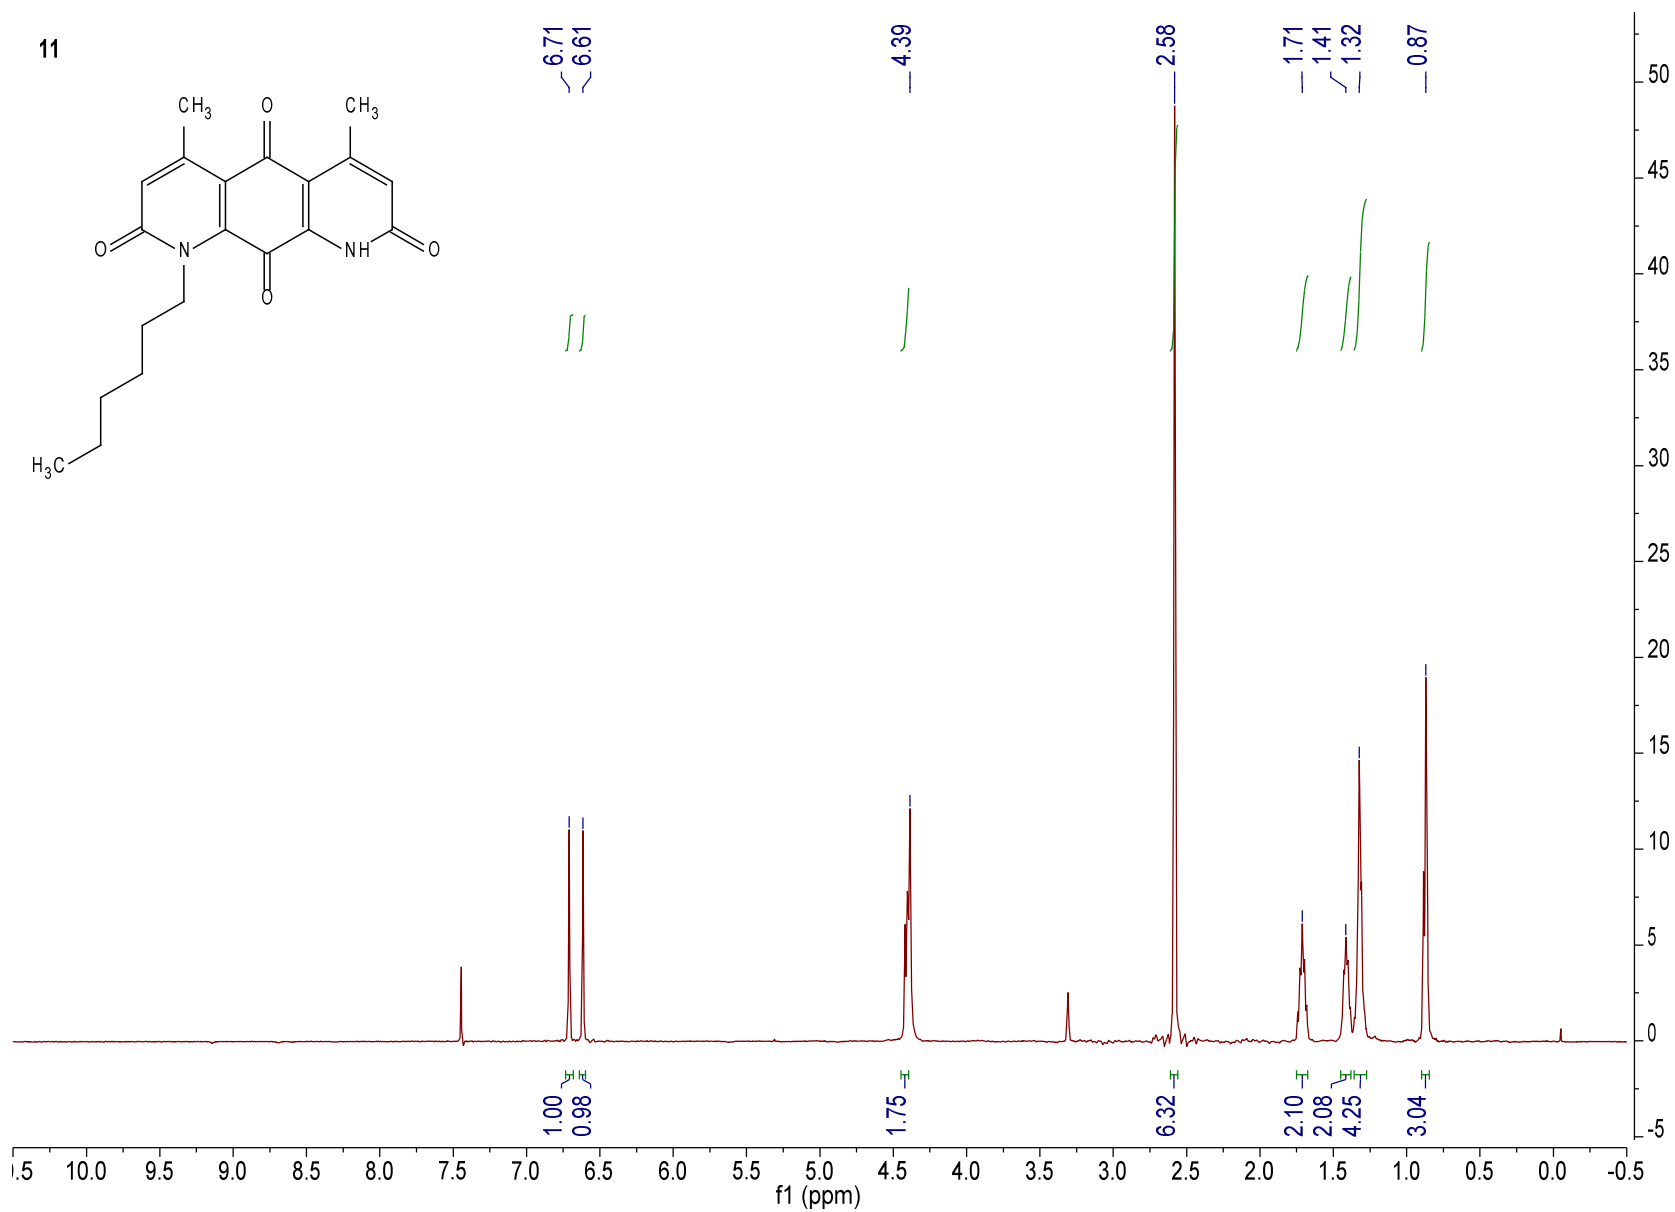

11

Chemical structure of 1-(4-methyl-2,6-pyridinediyl)-4,5,6,7-tetrahydrophthalazine-3-carboxamide is shown. The structure features a central phthalazine core with a methyl group at position 4, a methyl group at position 7, and a carboxamide group at position 3. The pyridine ring is substituted with a methyl group at position 4 and a methyl group at position 7. The phthalazine ring is substituted with a methyl group at position 4 and a methyl group at position 7.

<sup>13</sup>C NMR spectrum (f1 (ppm) vs f2) showing peaks at the following chemical shifts (ppm): 181.98, 175.56, 162.34, 162.18, 152.18, 150.40, 139.83, 139.05, 127.93, 127.72, 119.97, 115.27, 47.10, 31.72, 29.29, 26.90, 23.41, 22.88, 22.35, and 14.12.

47

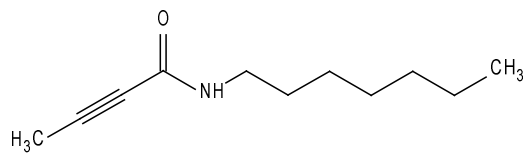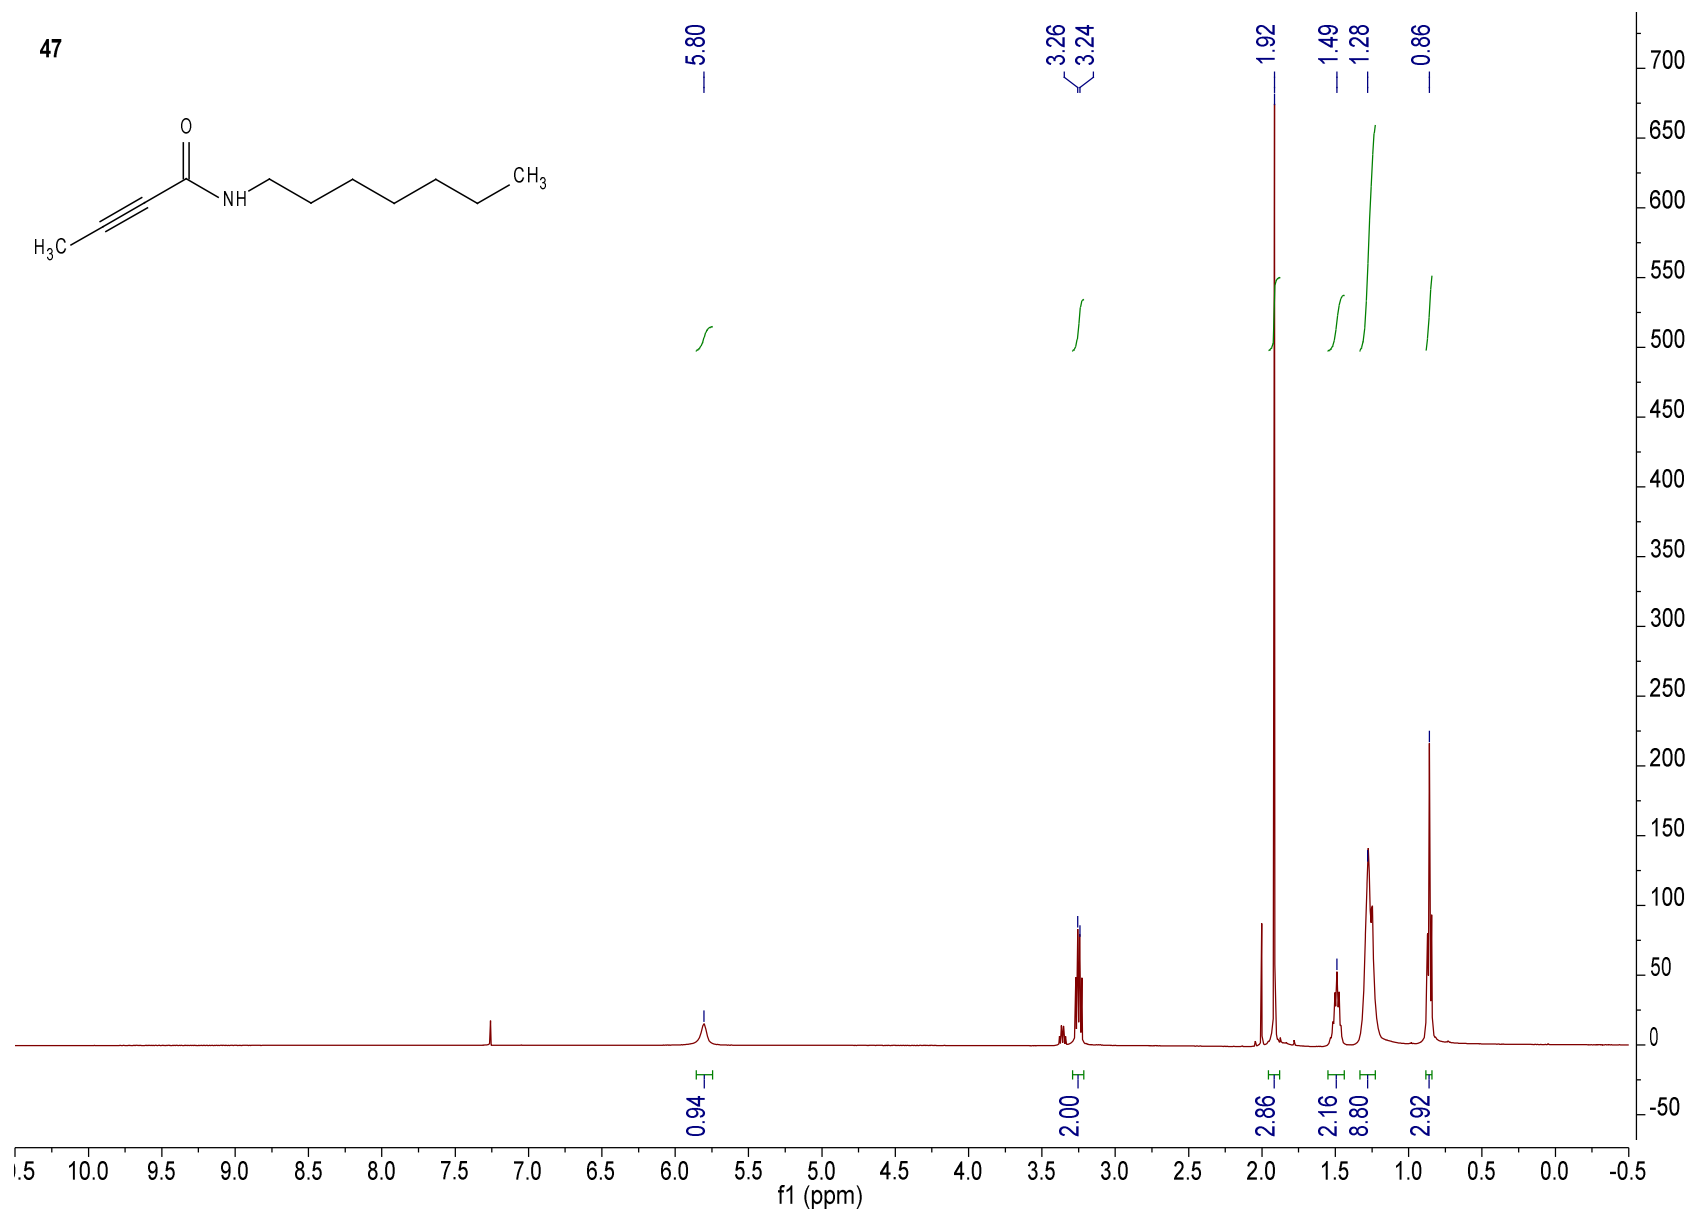

47

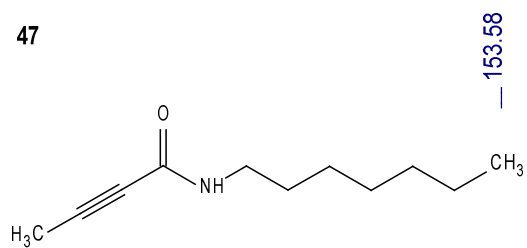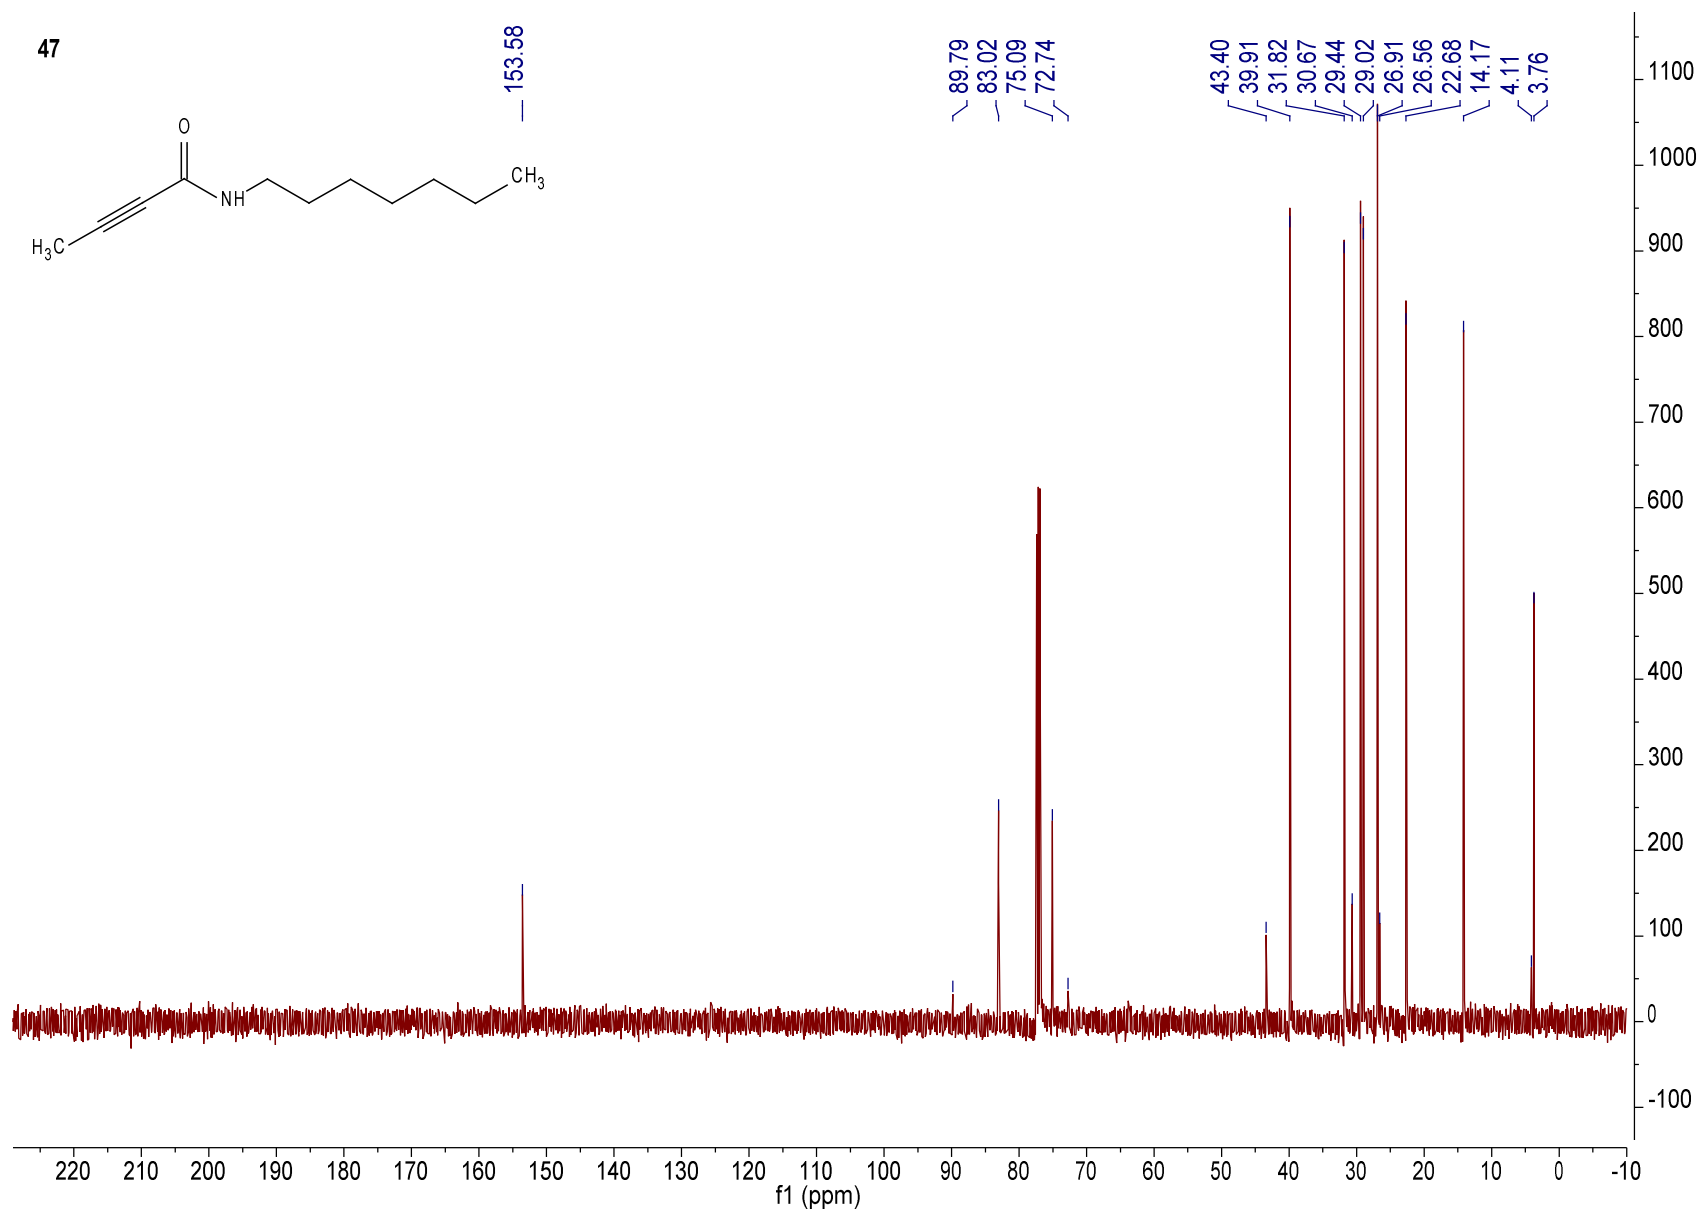

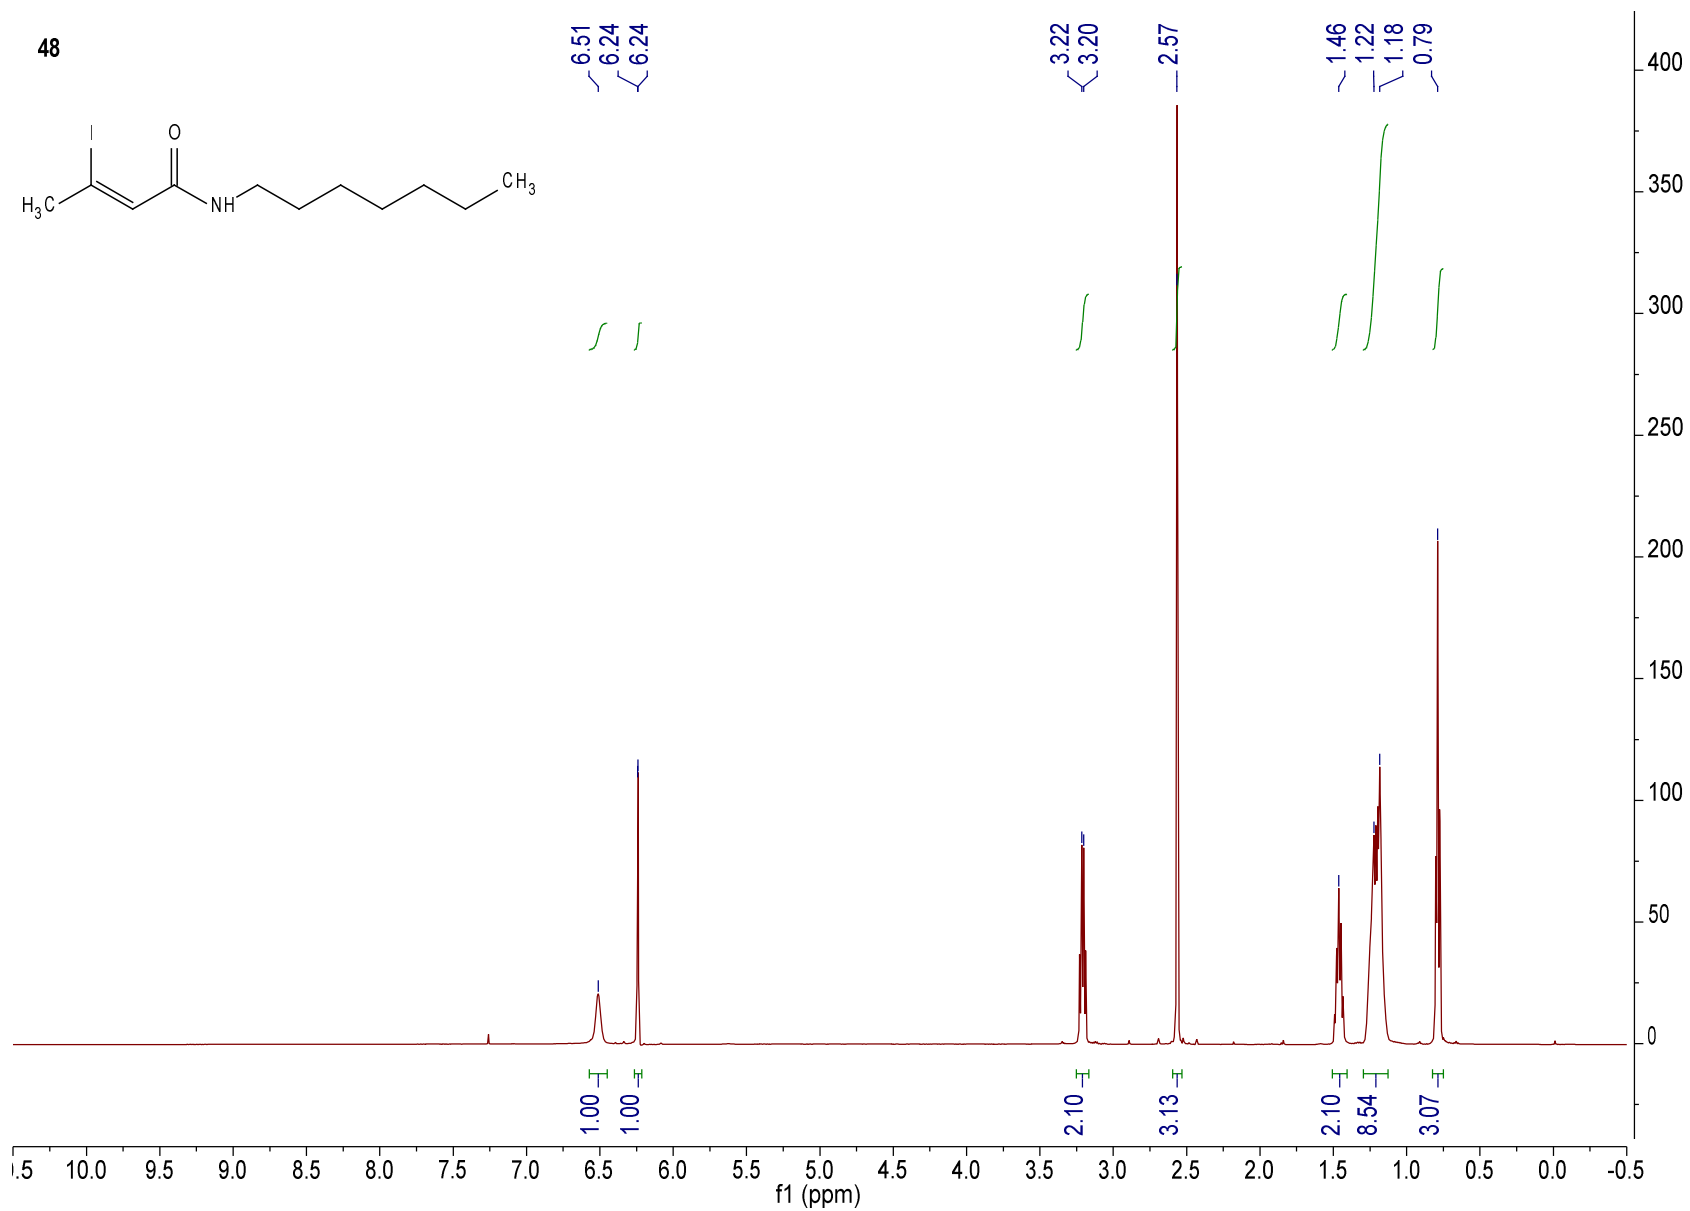

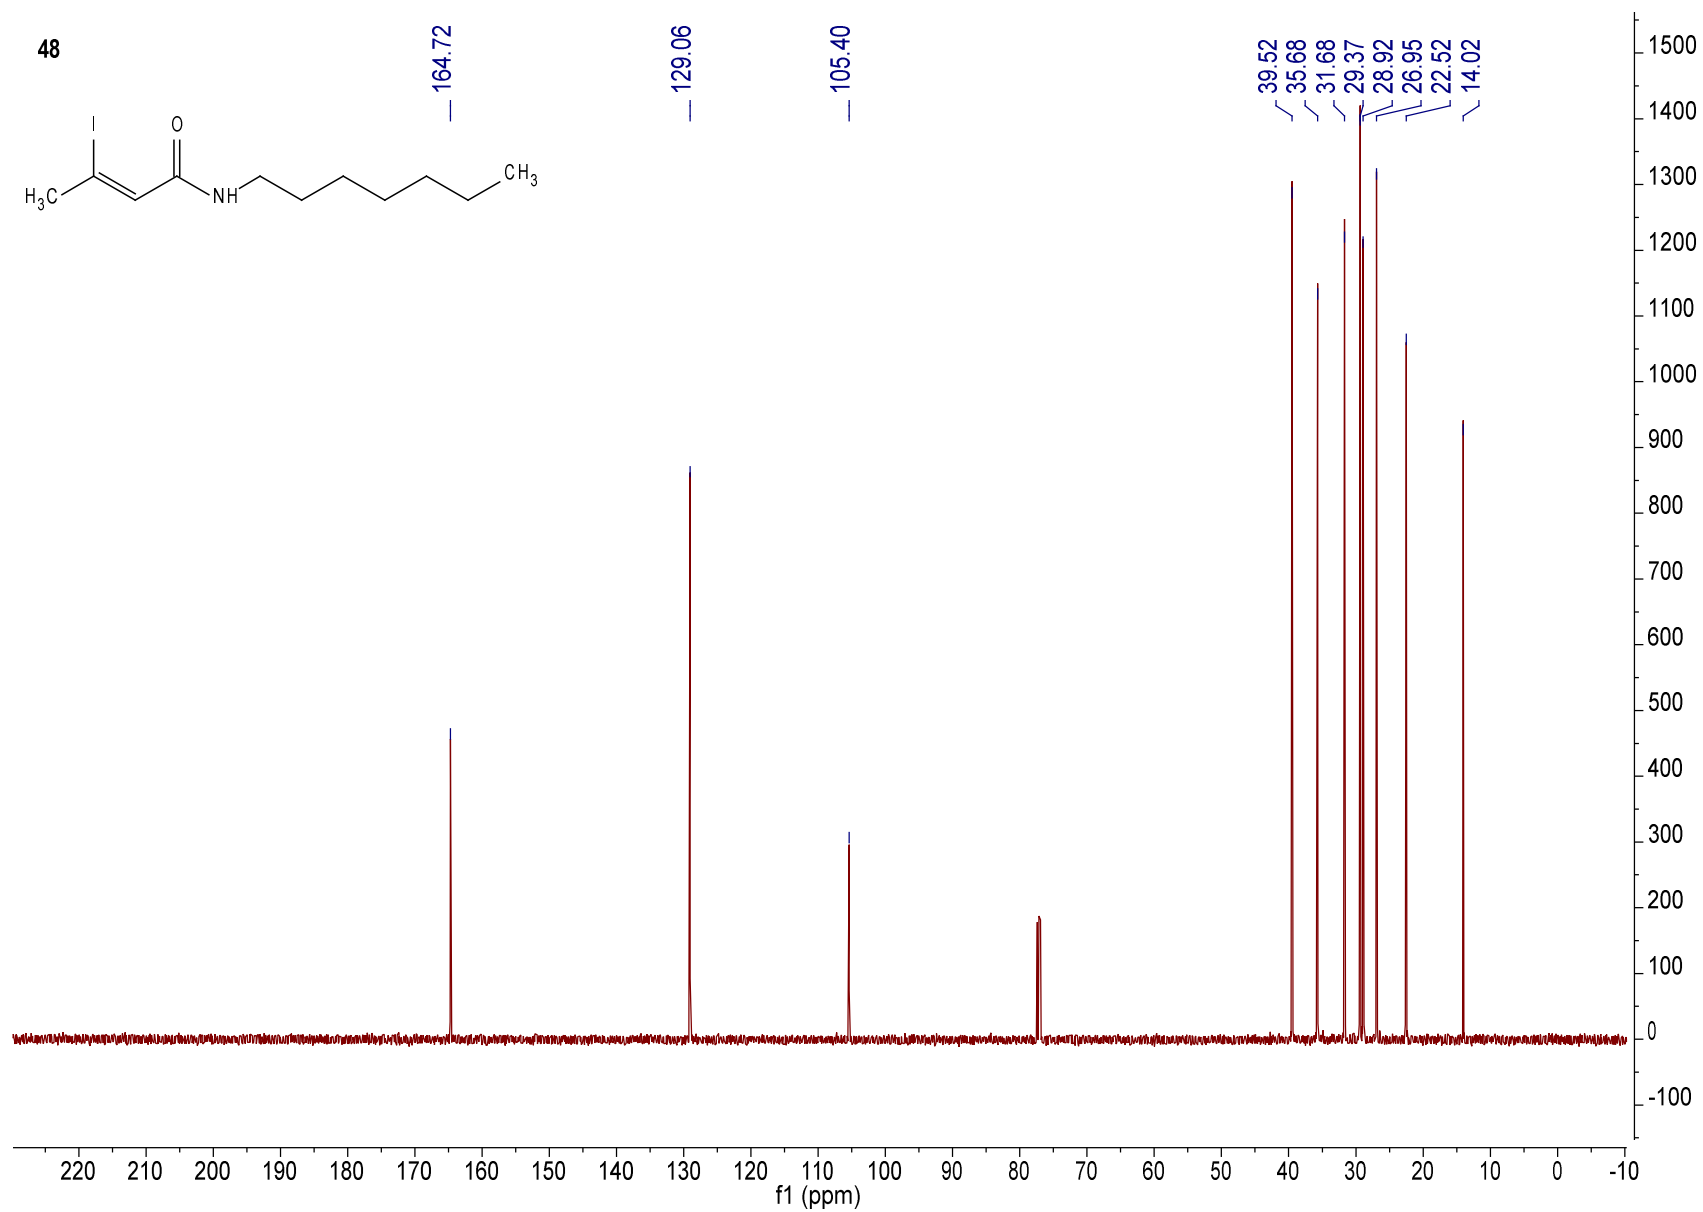

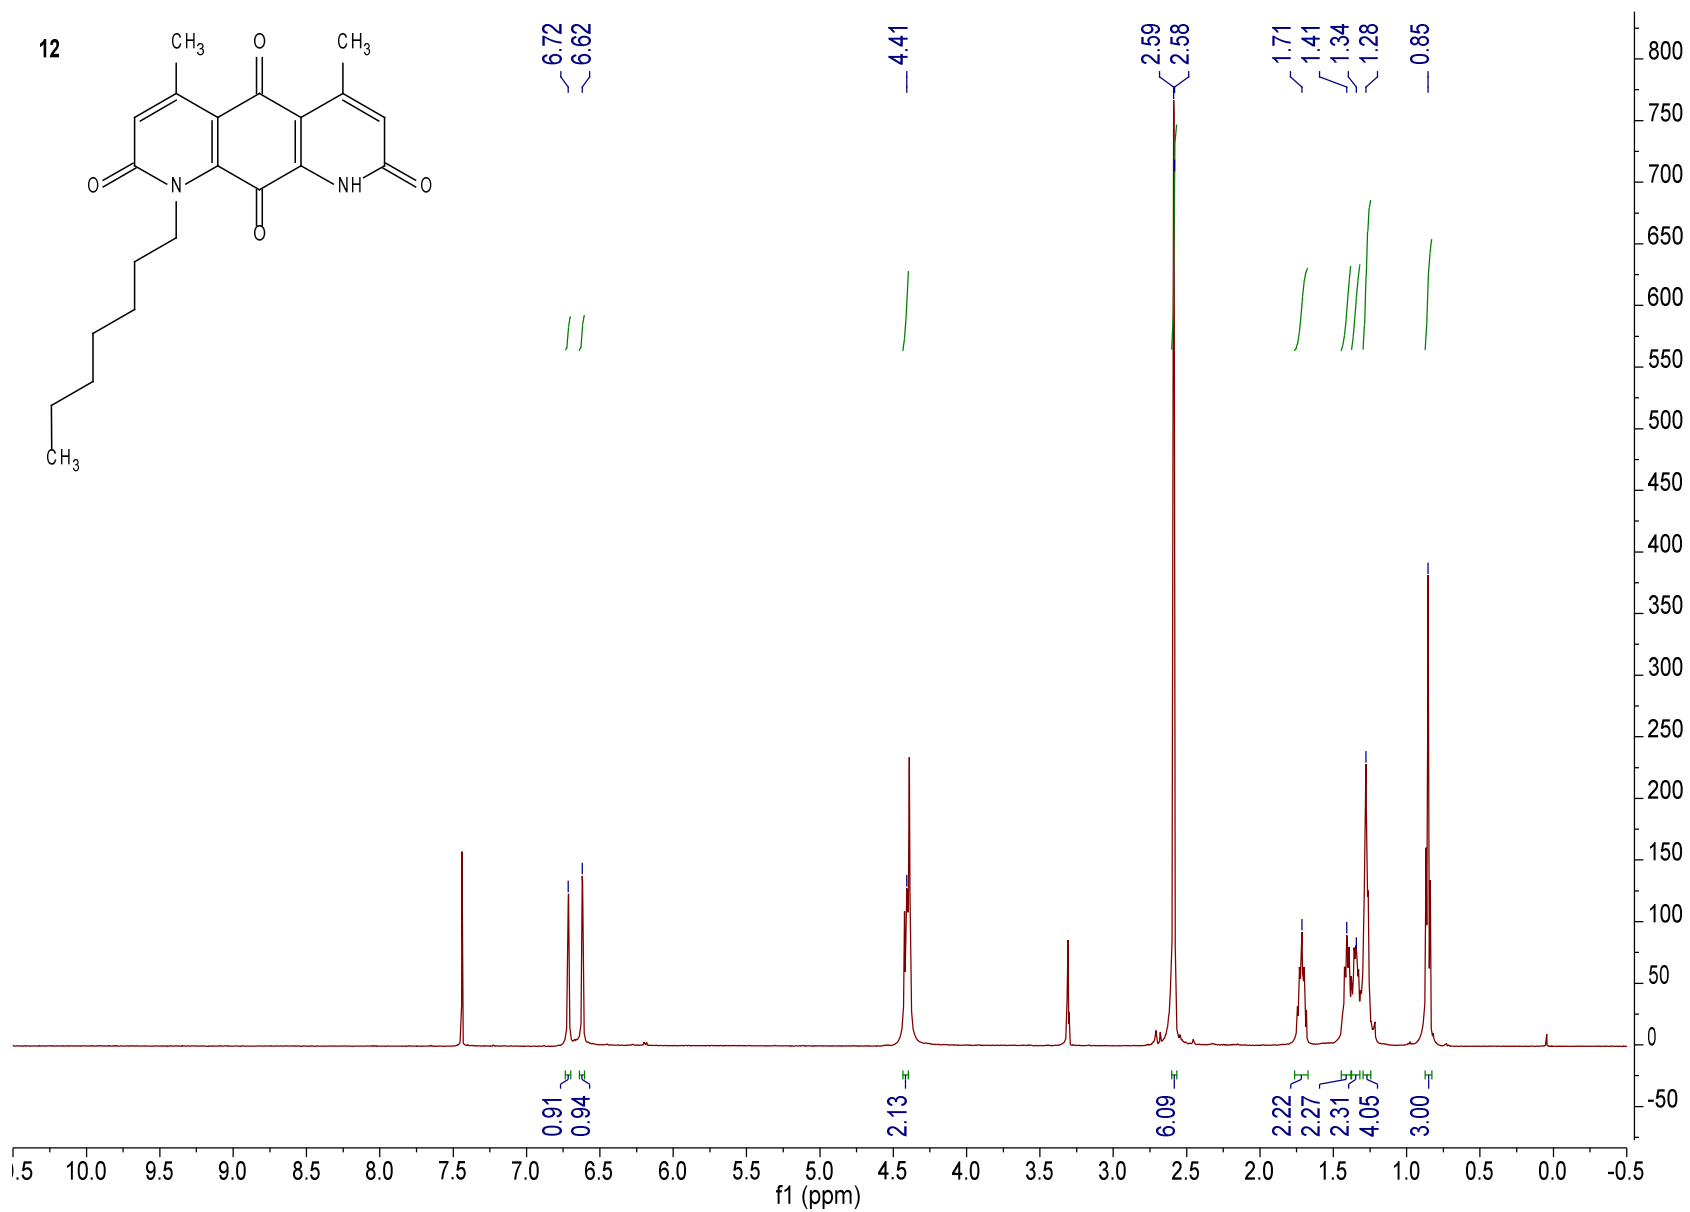

12

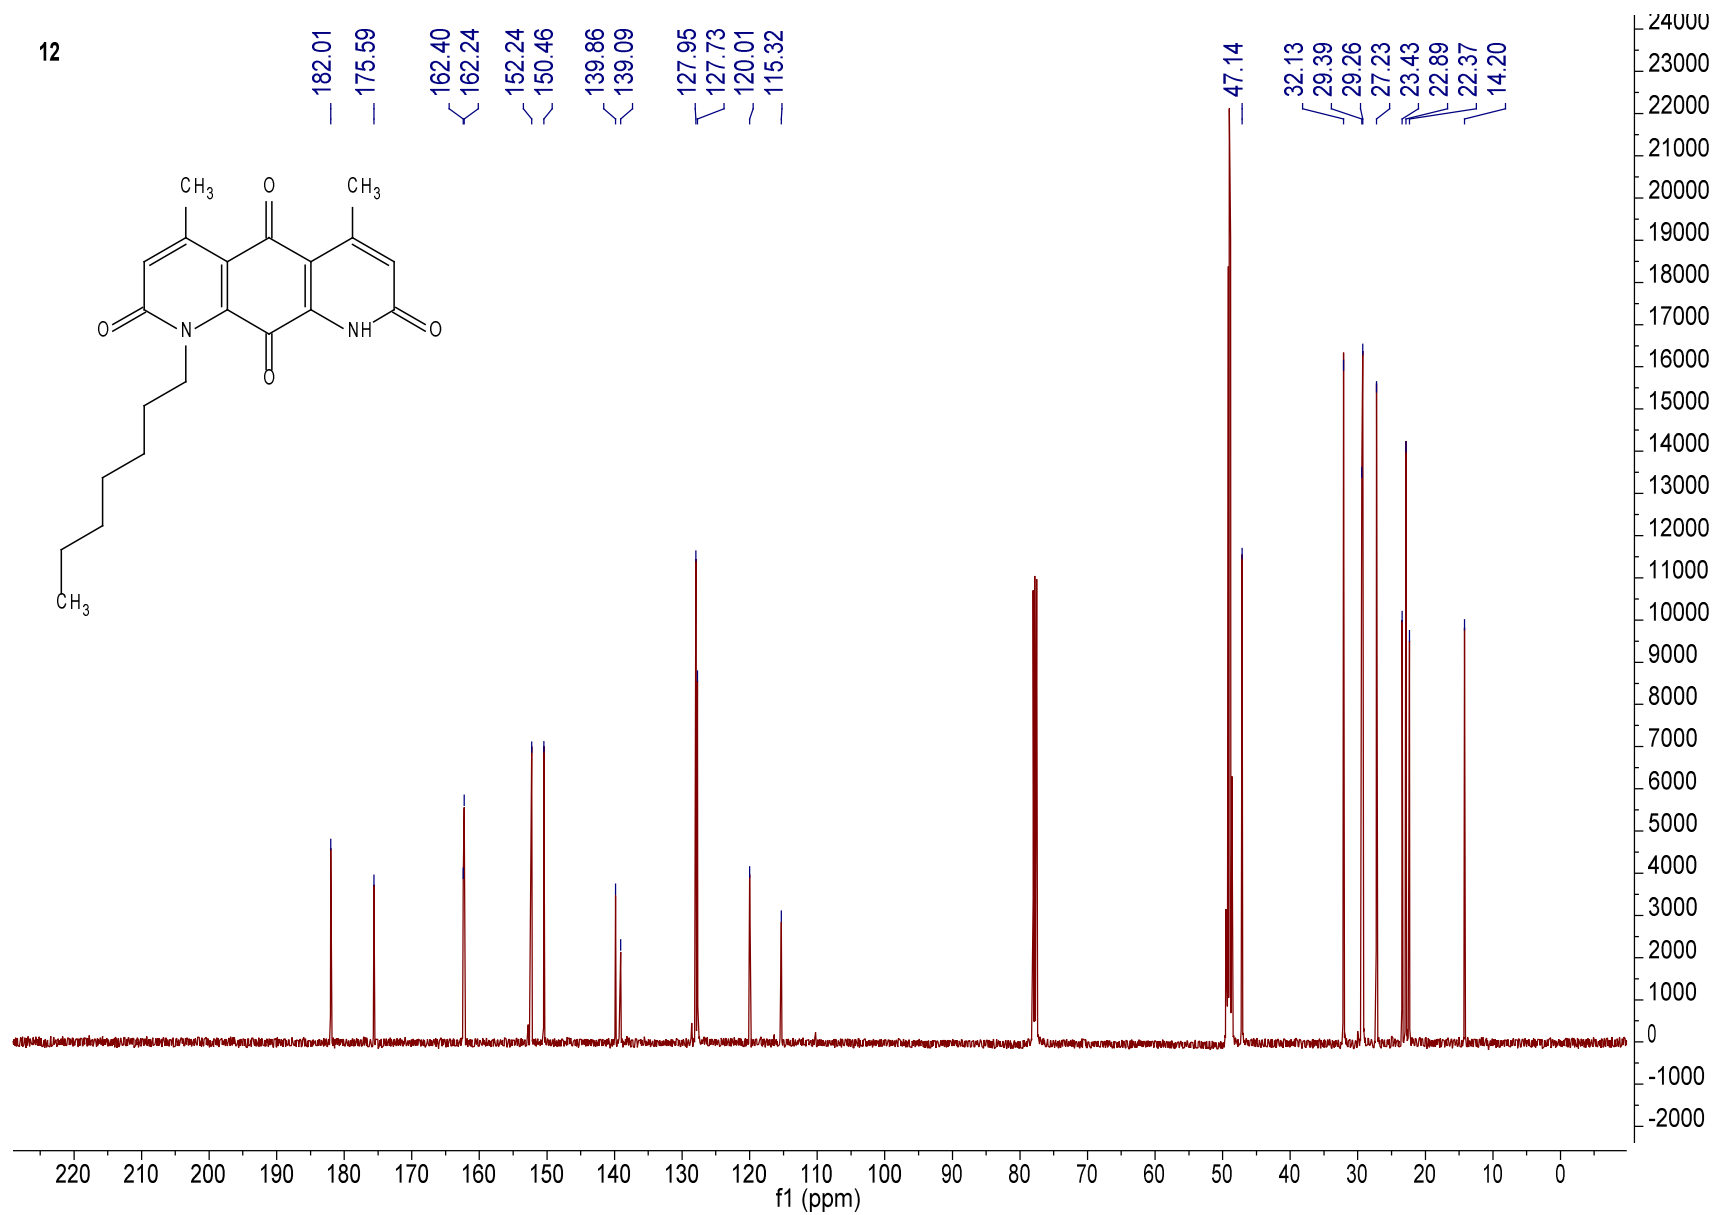



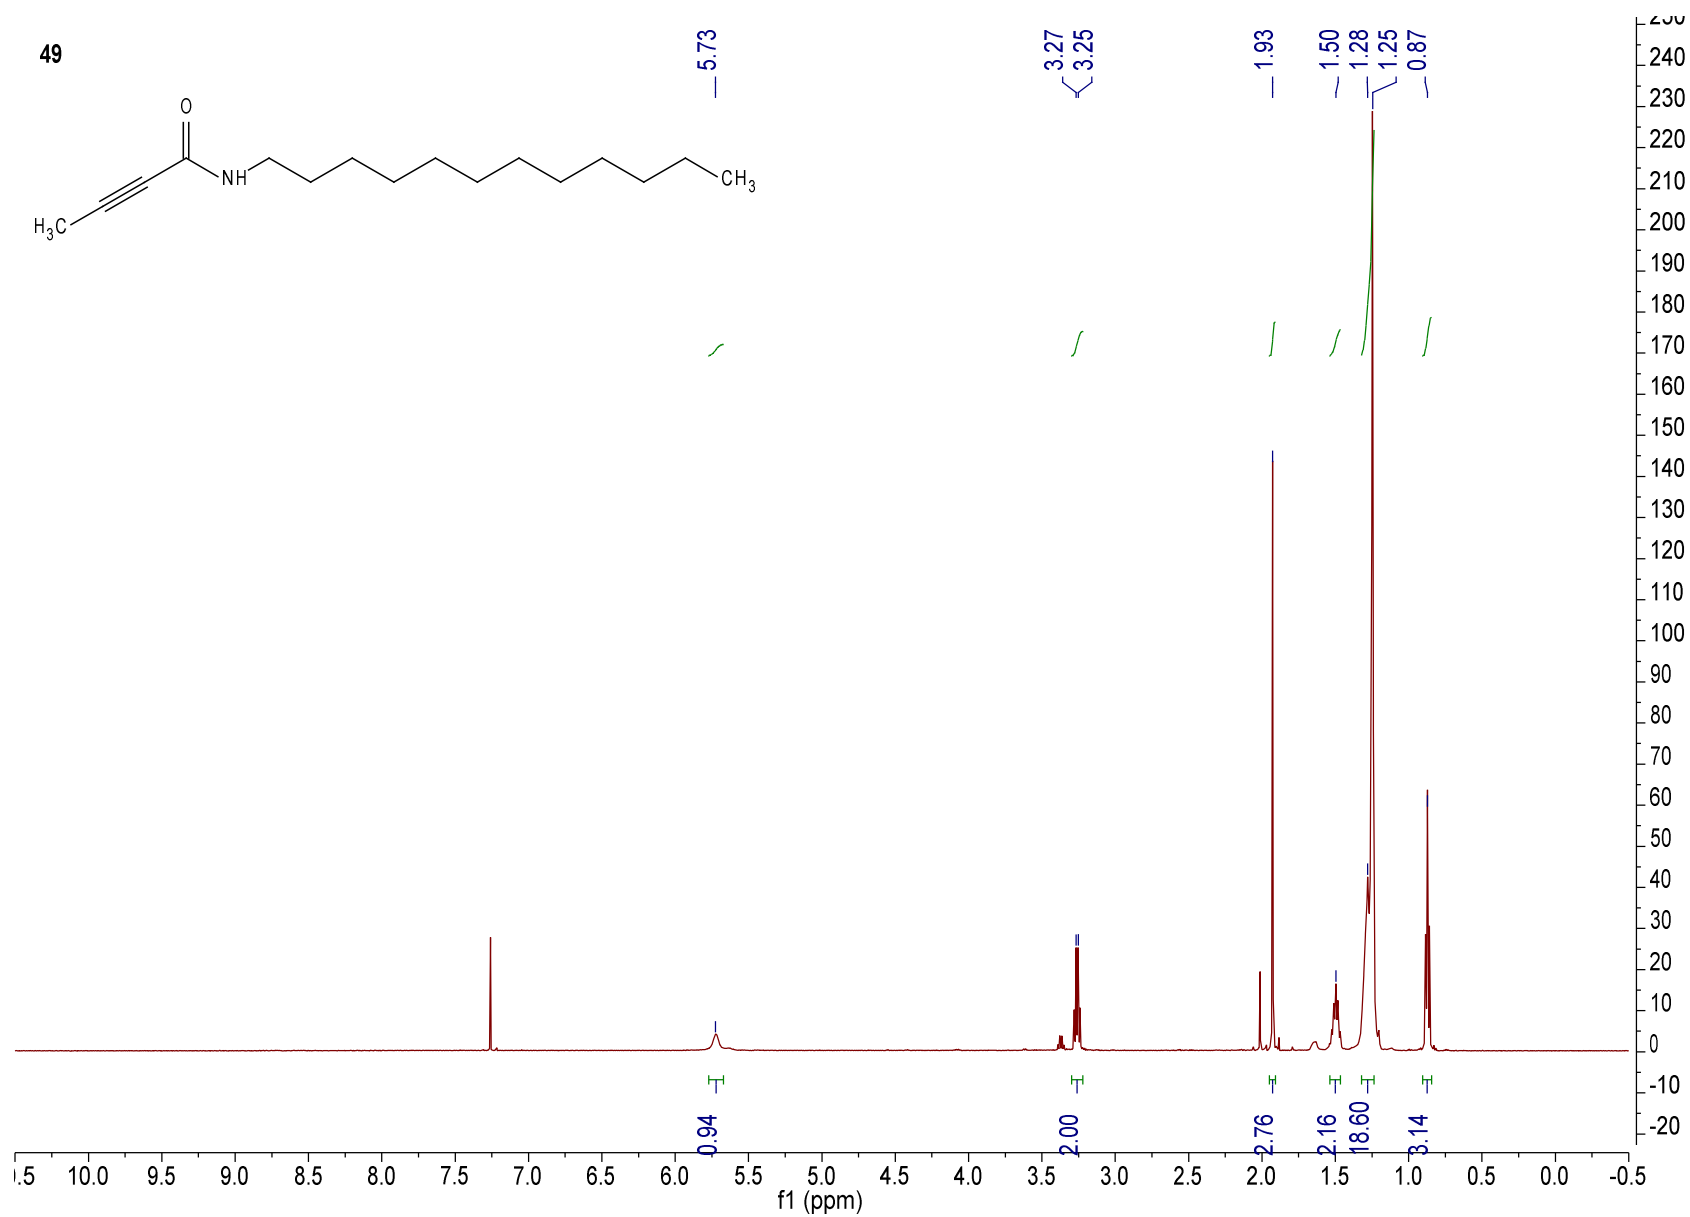

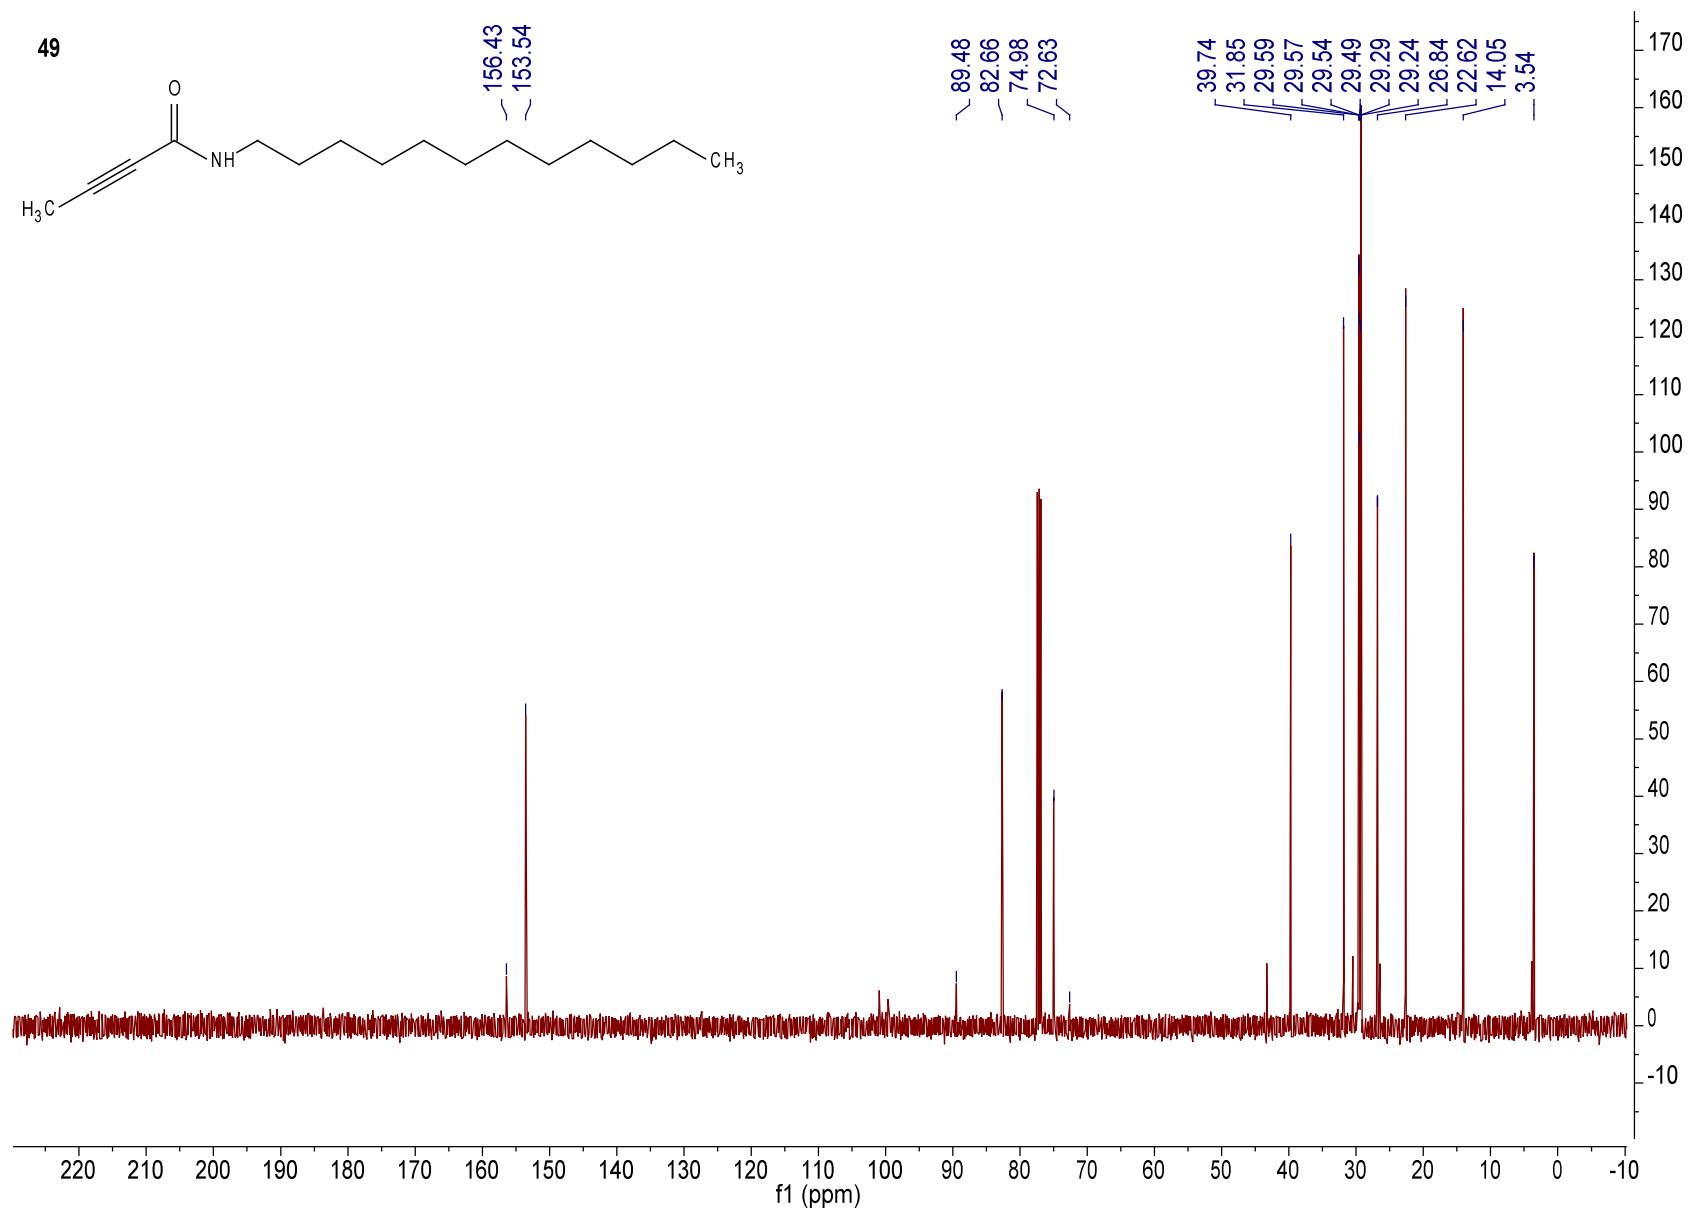

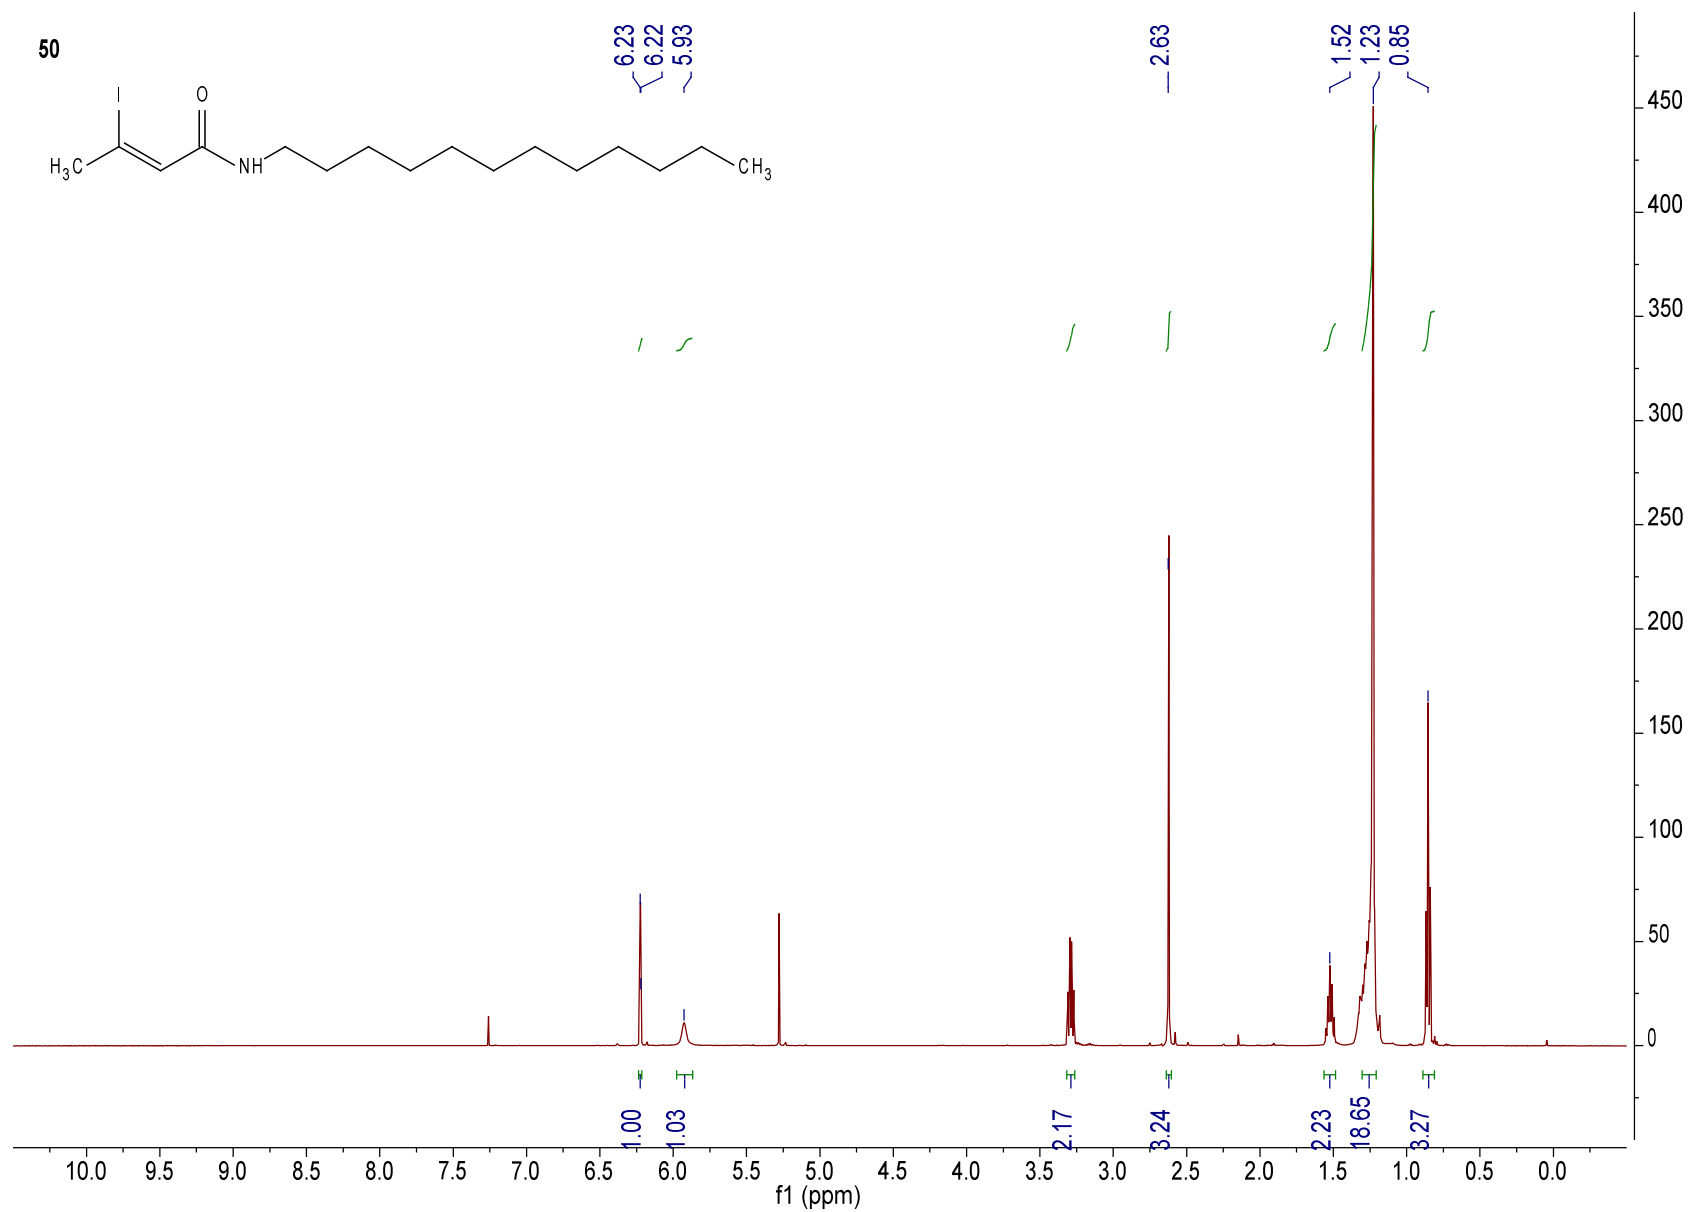

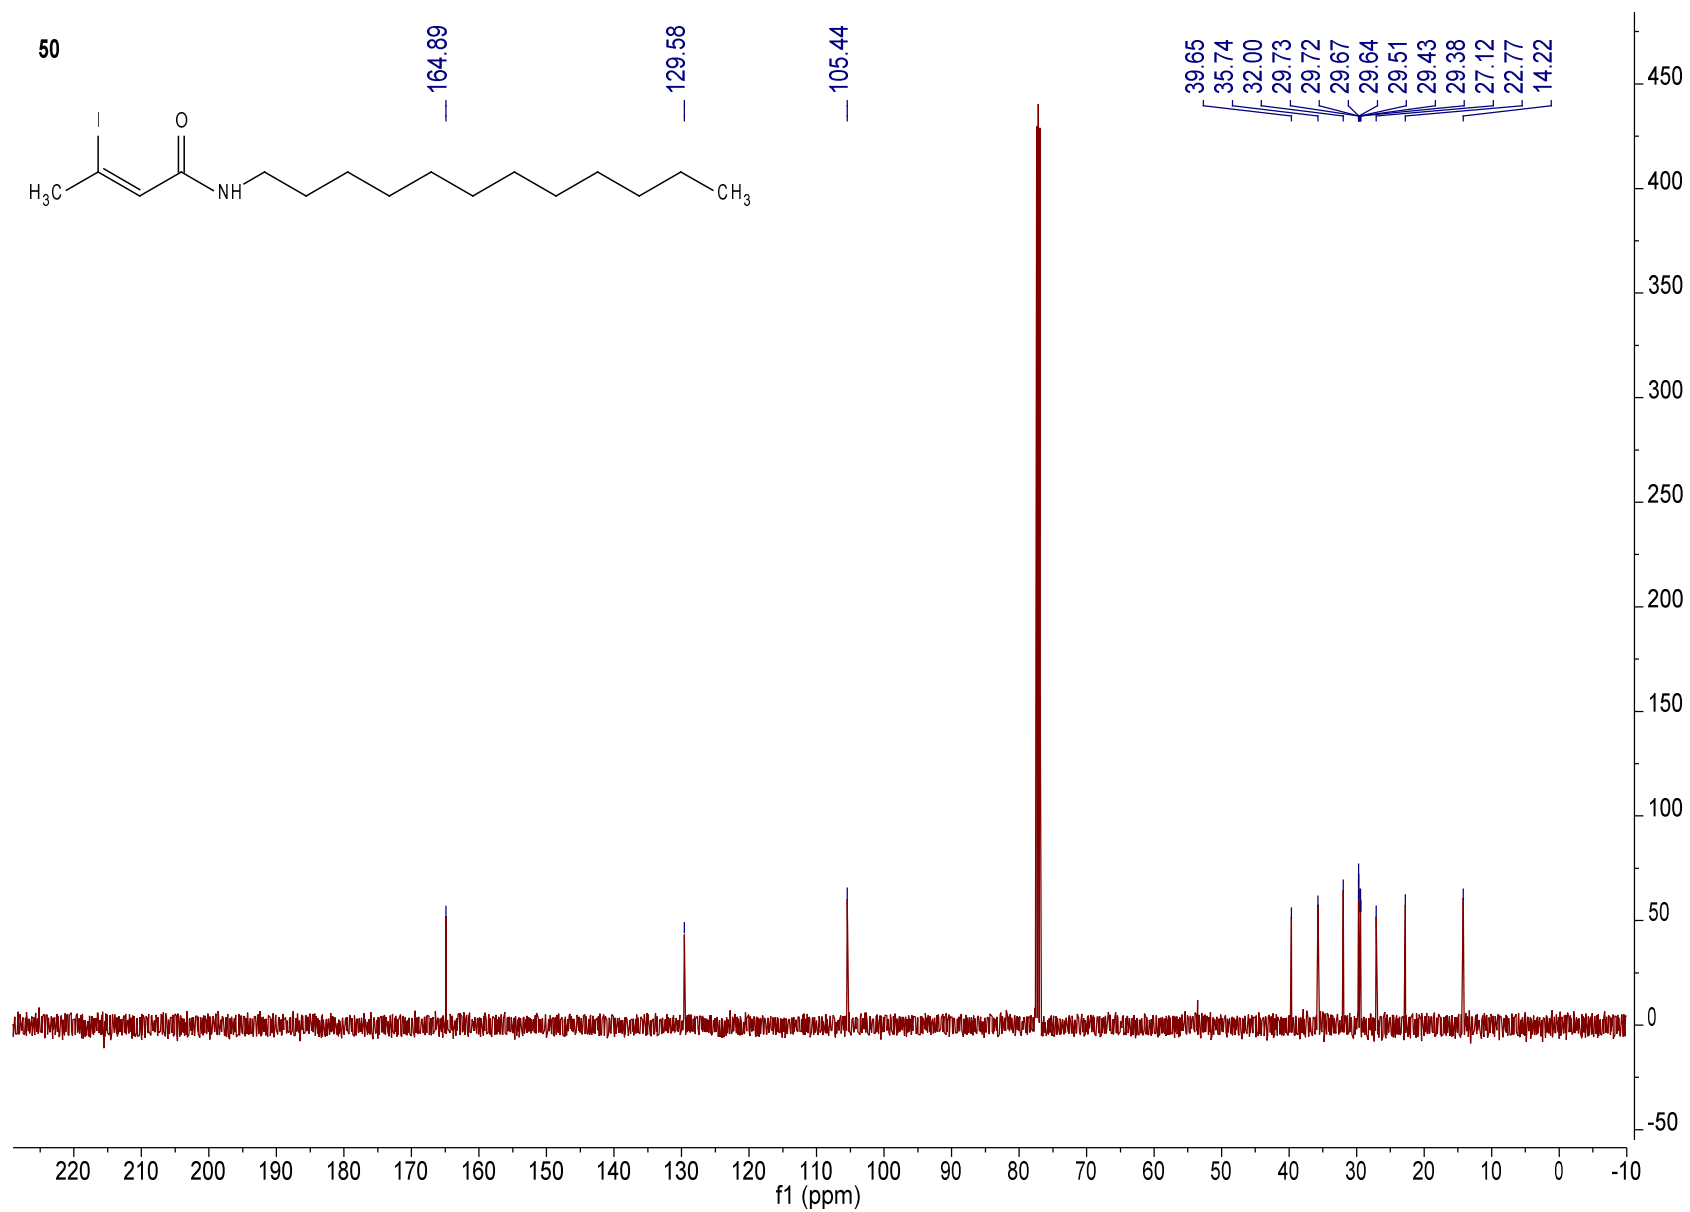

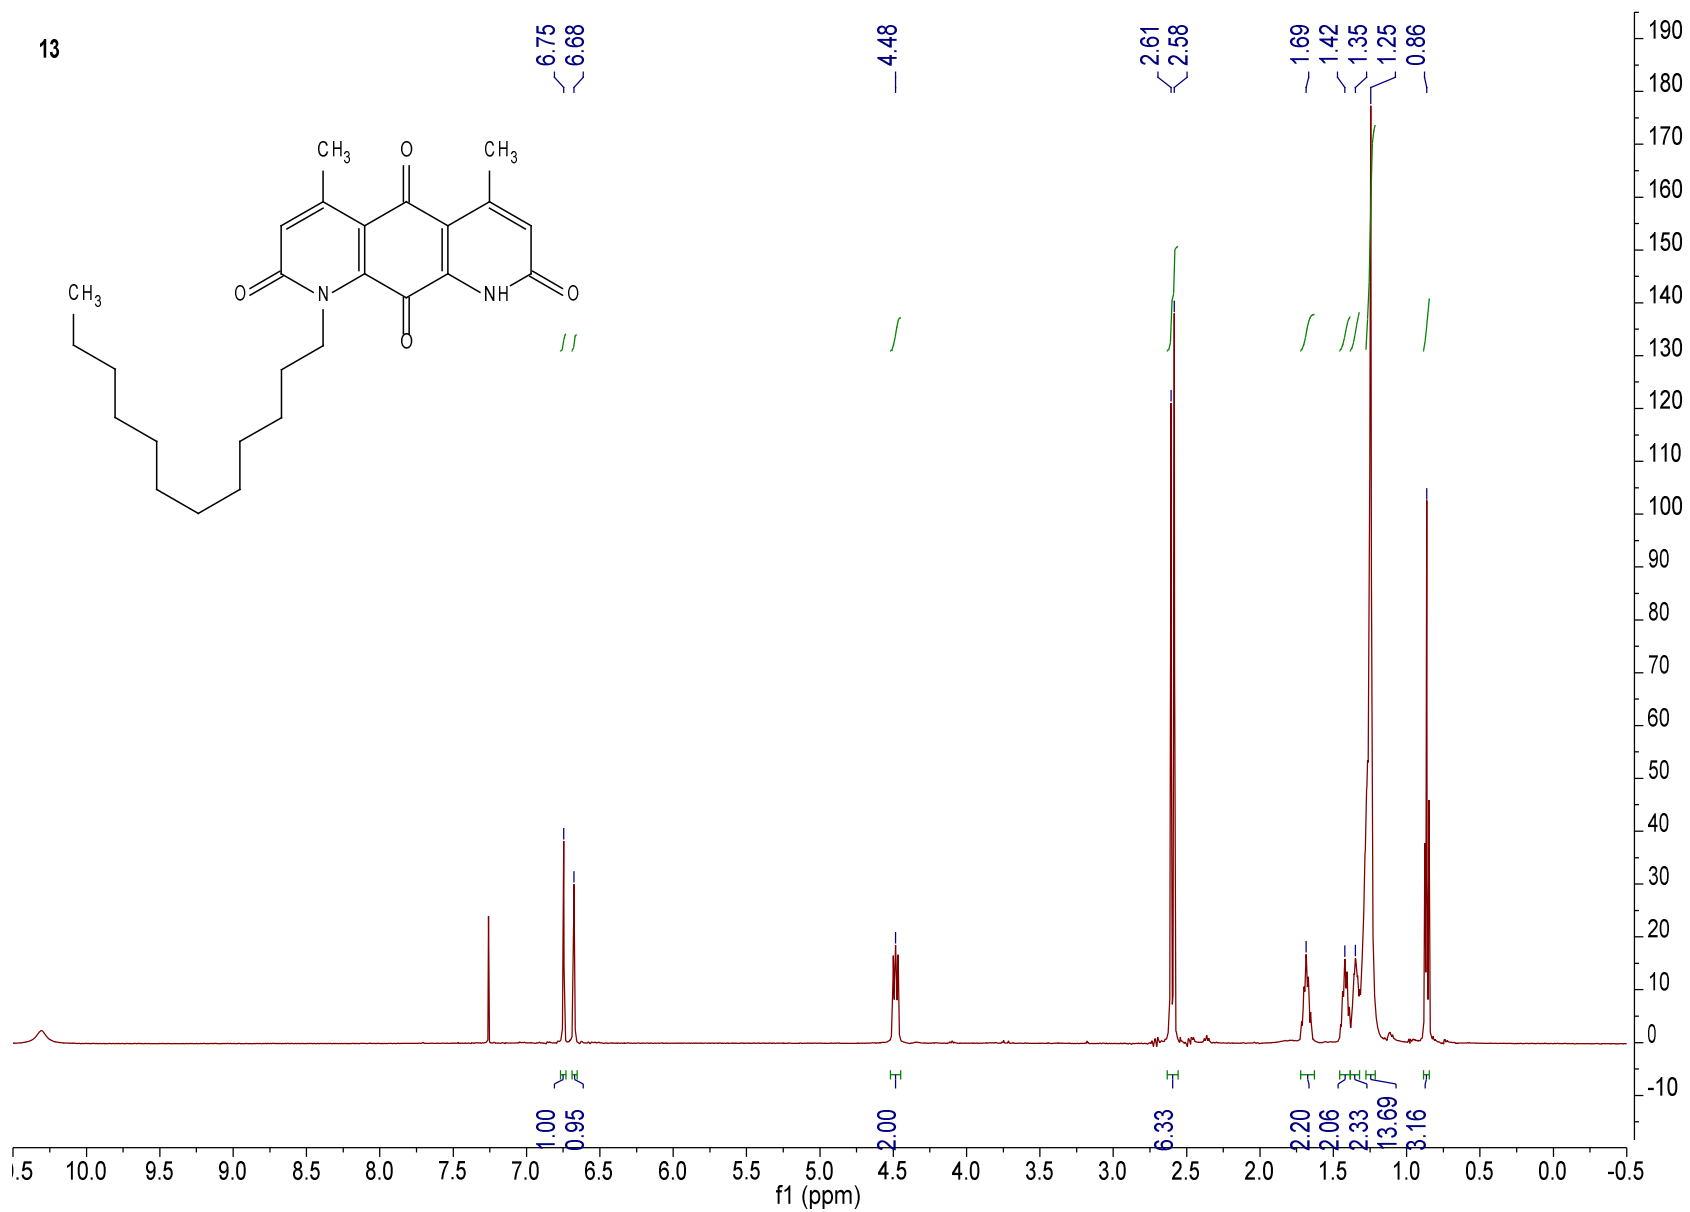

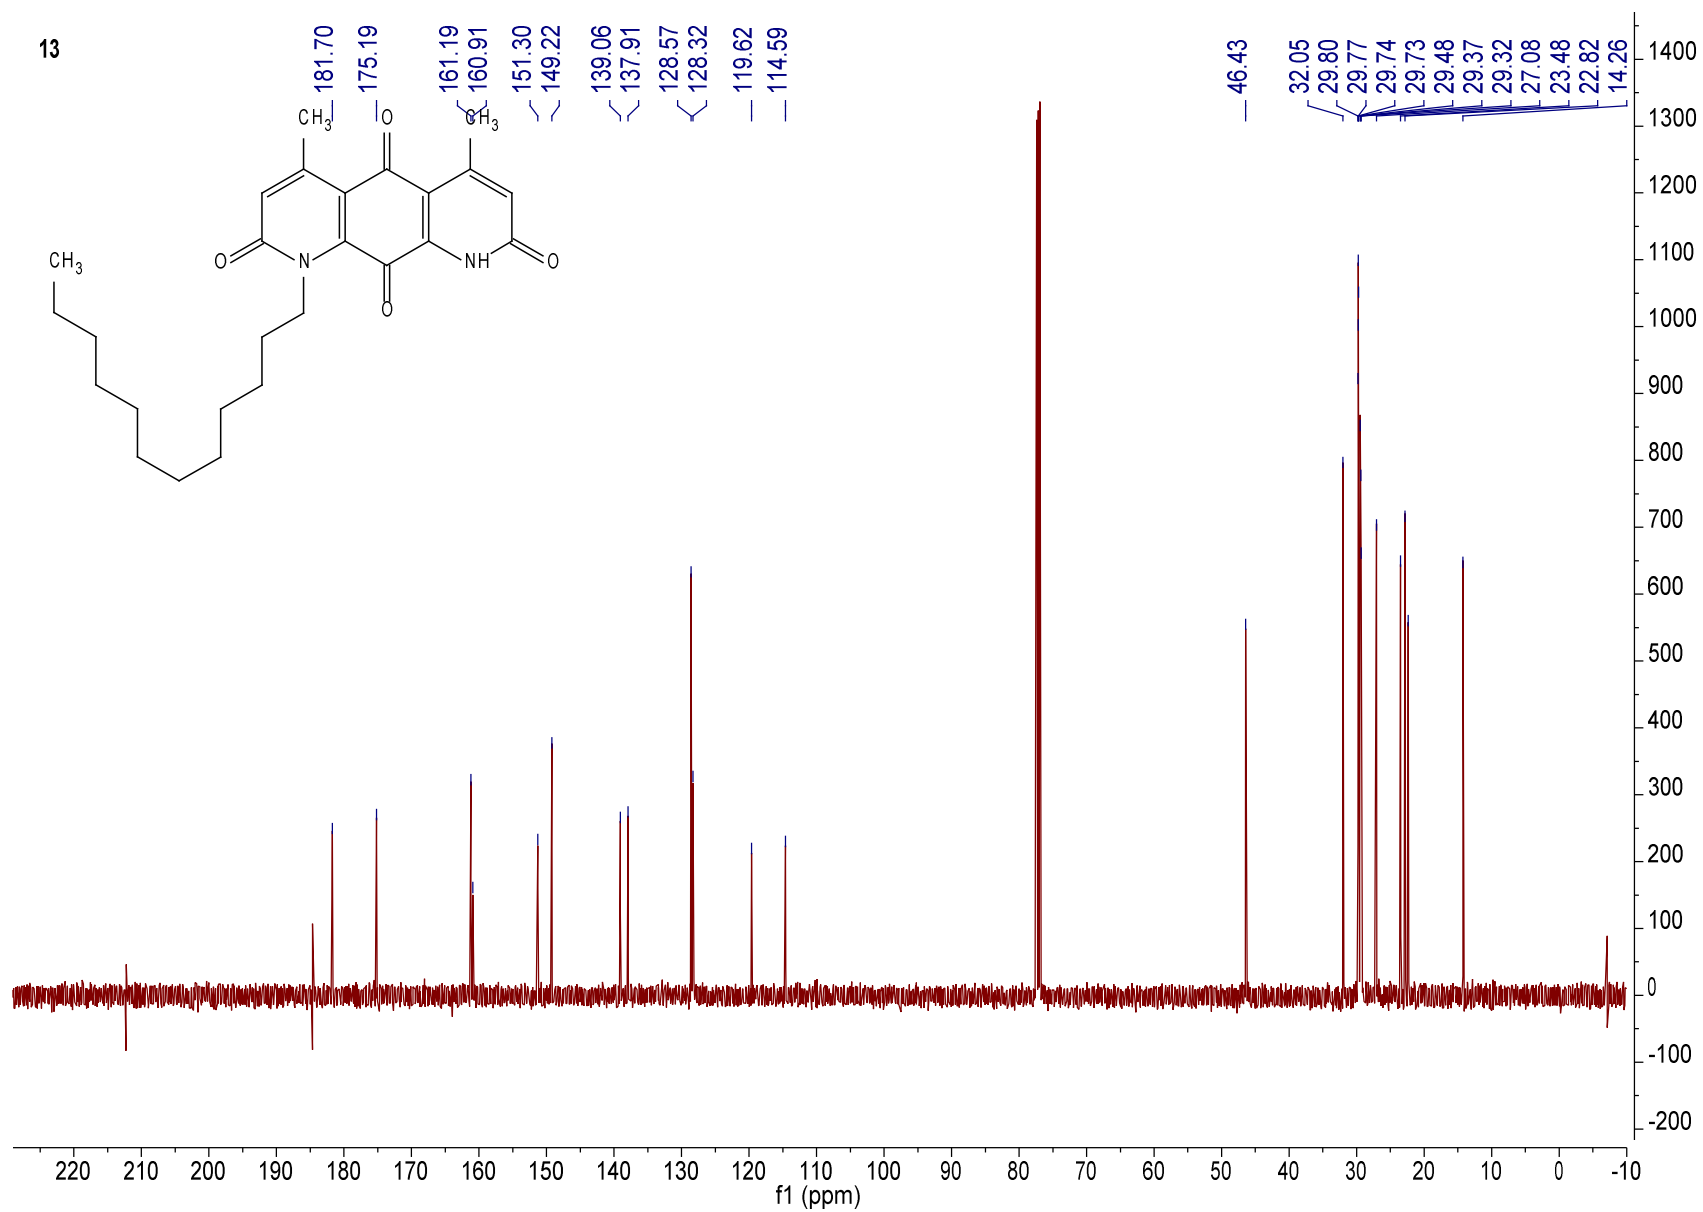

14

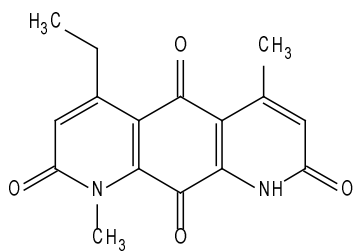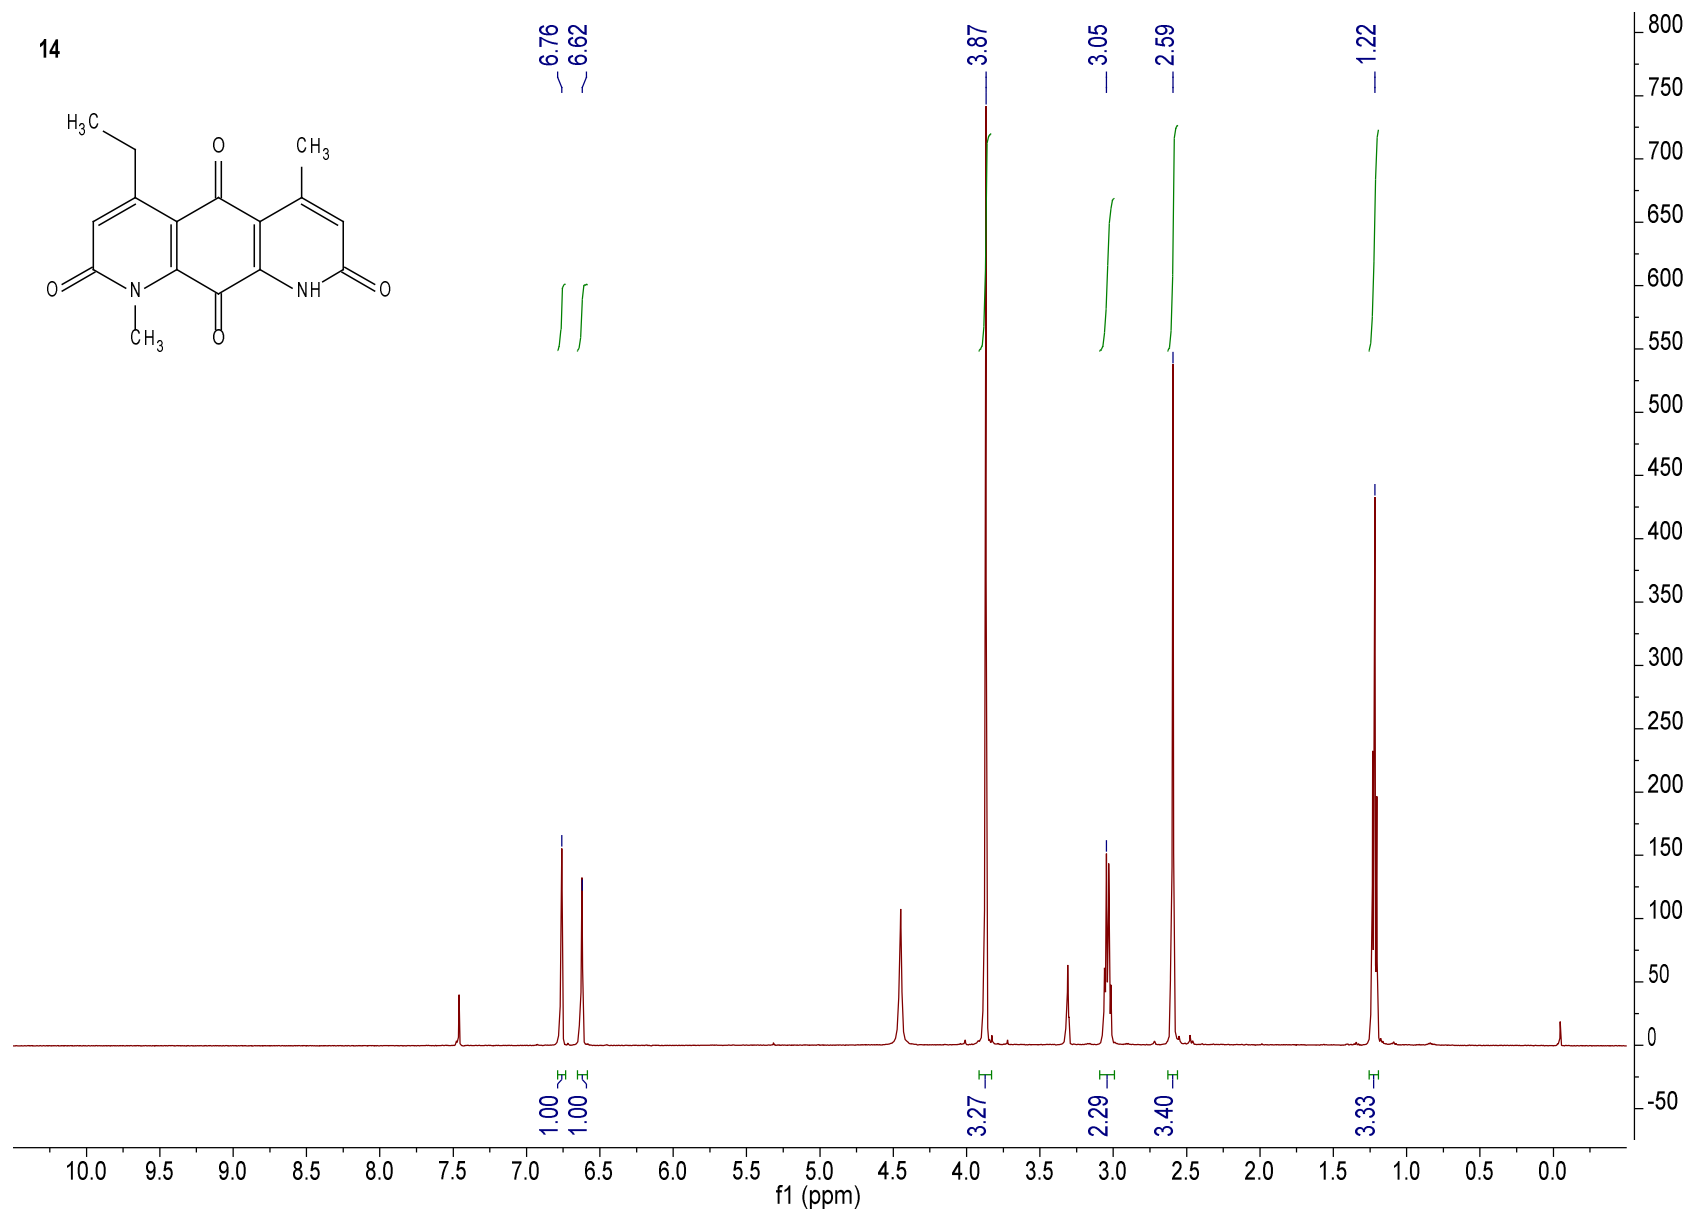

14

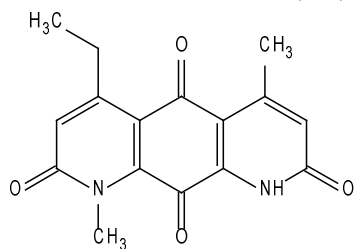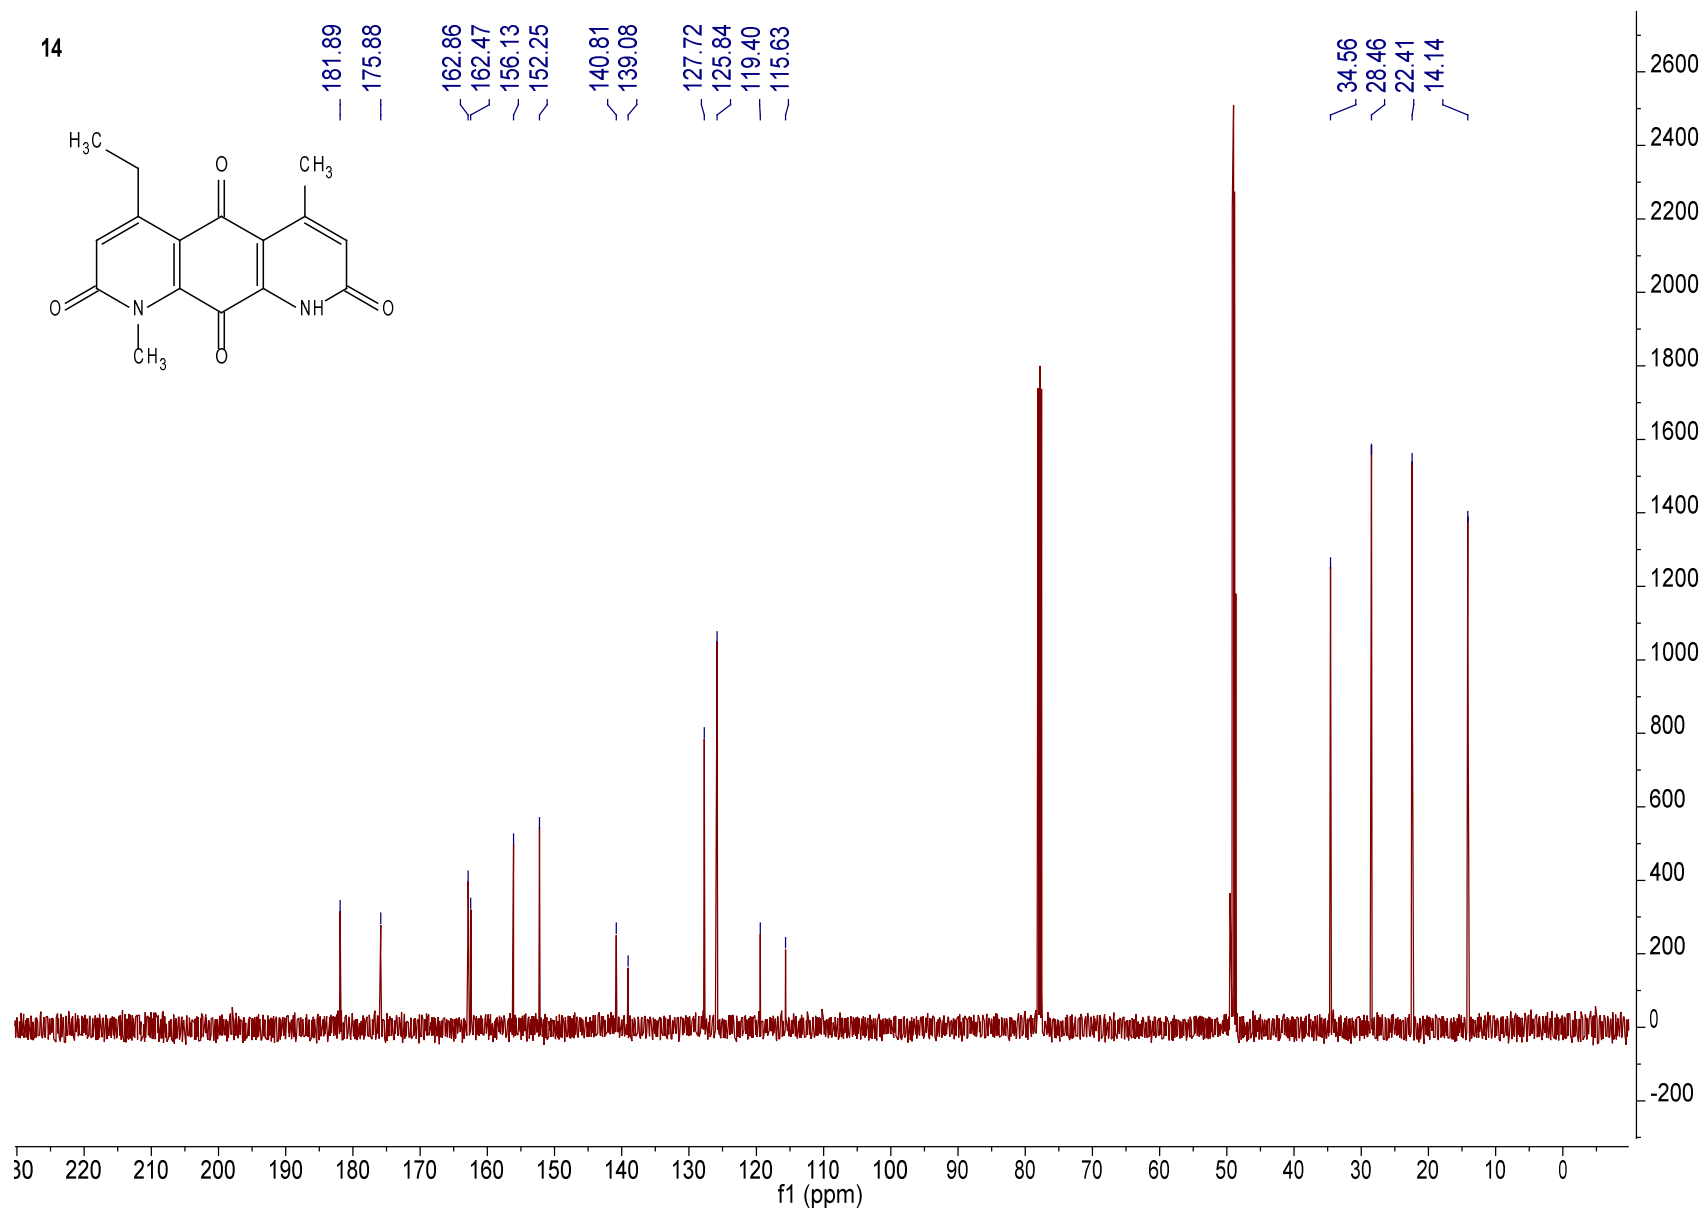



51

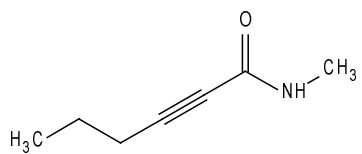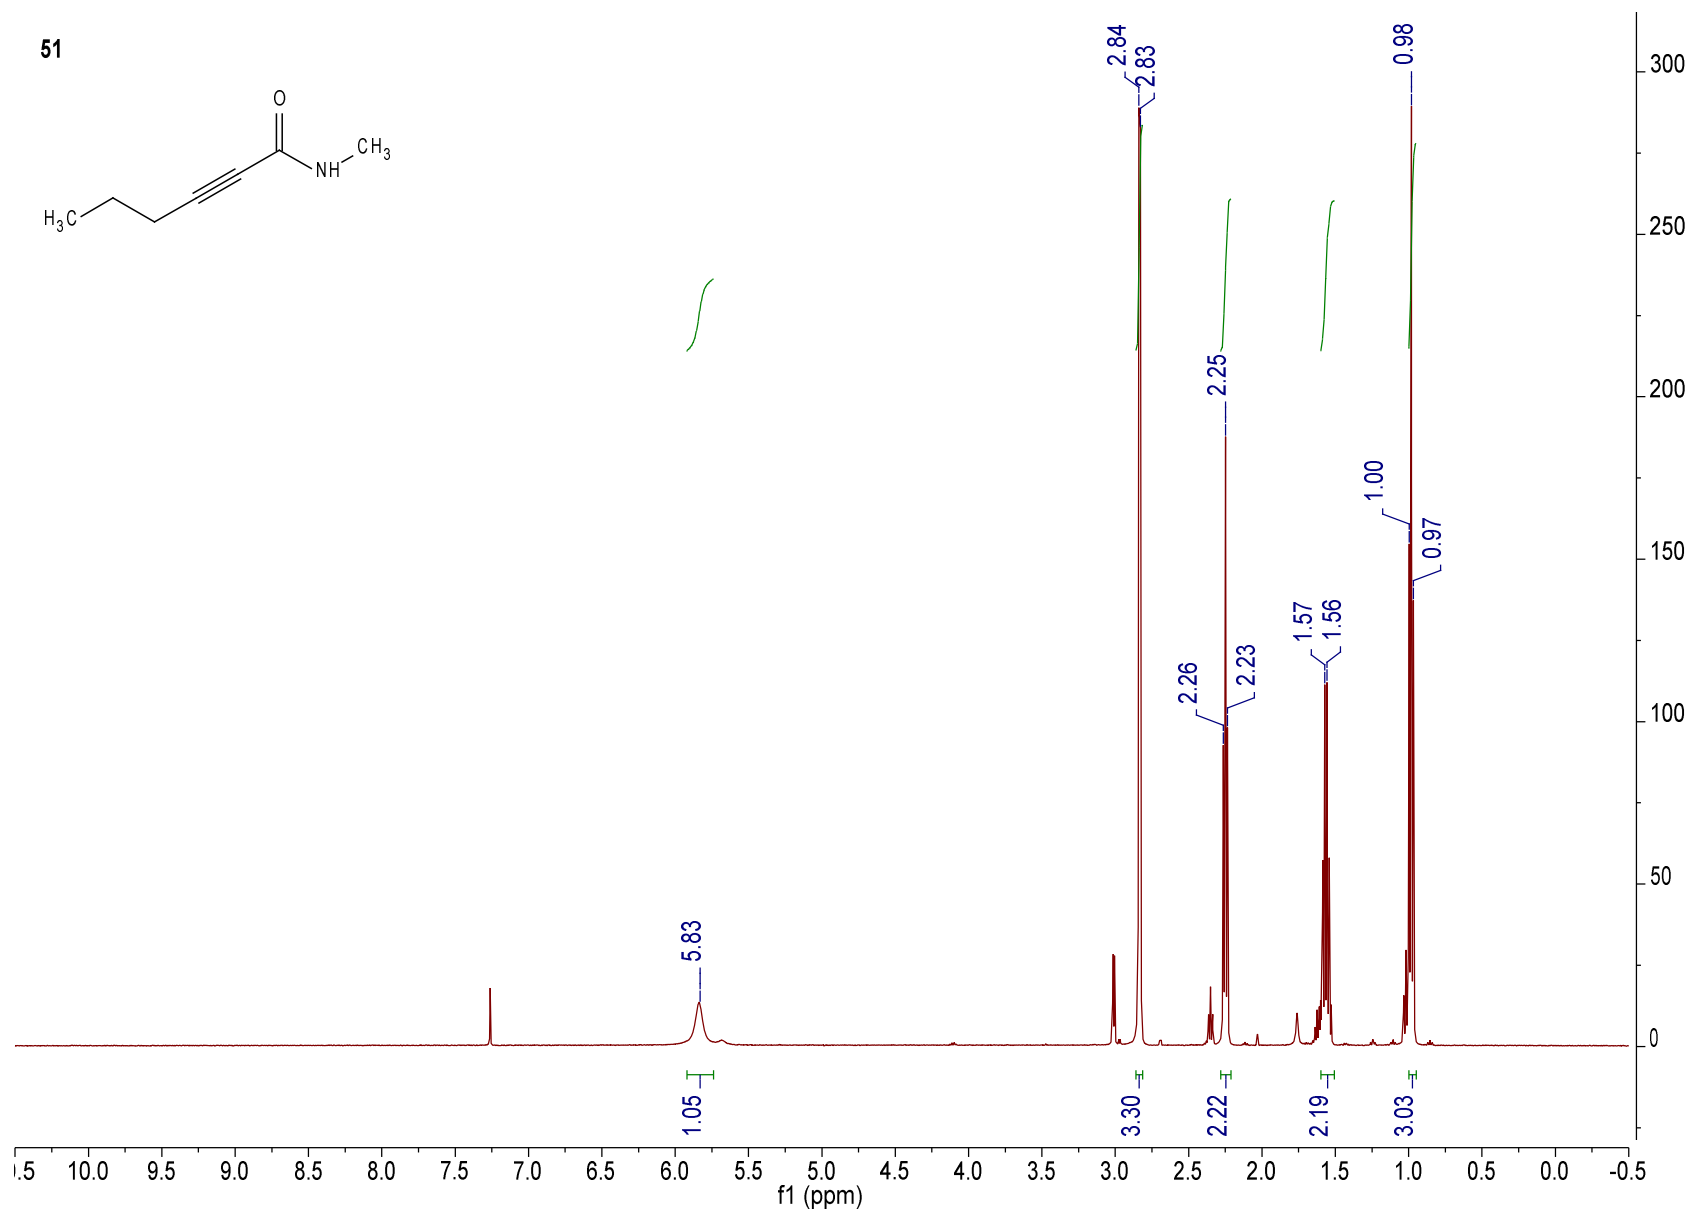

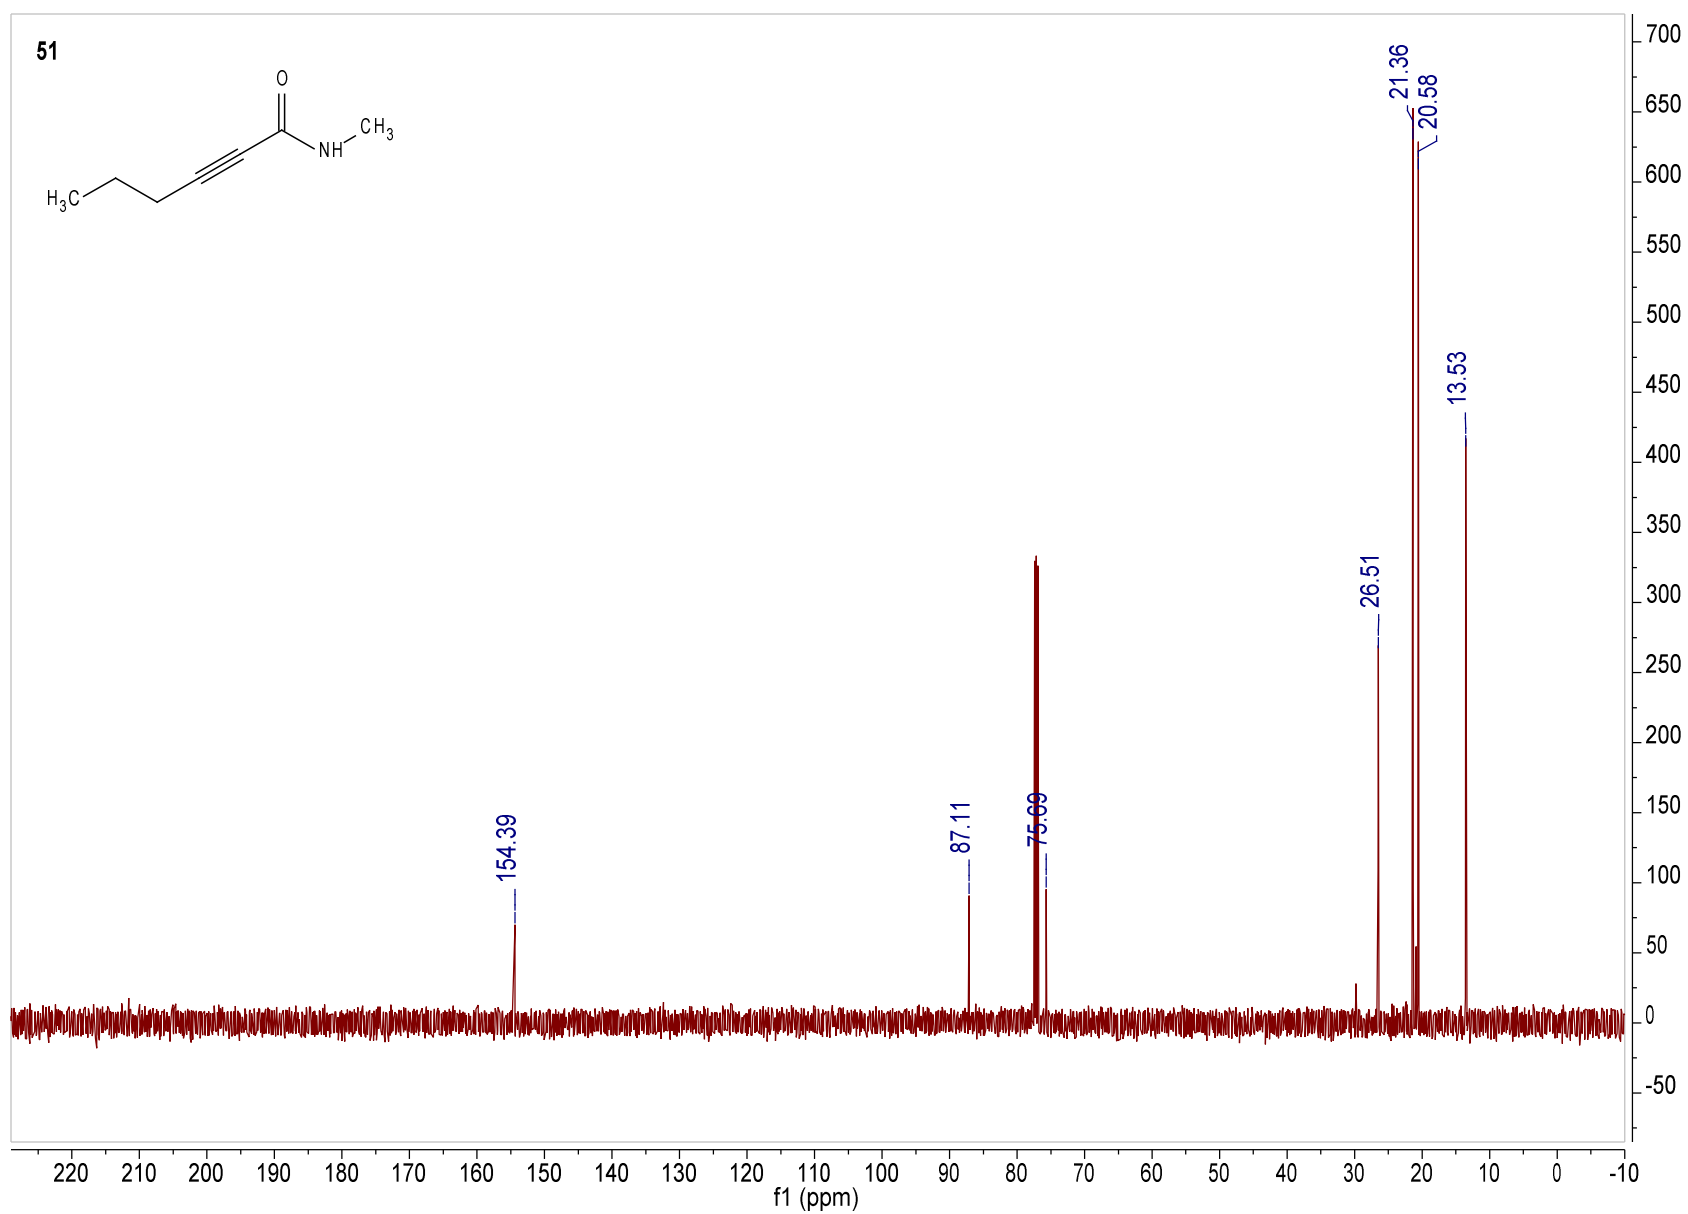

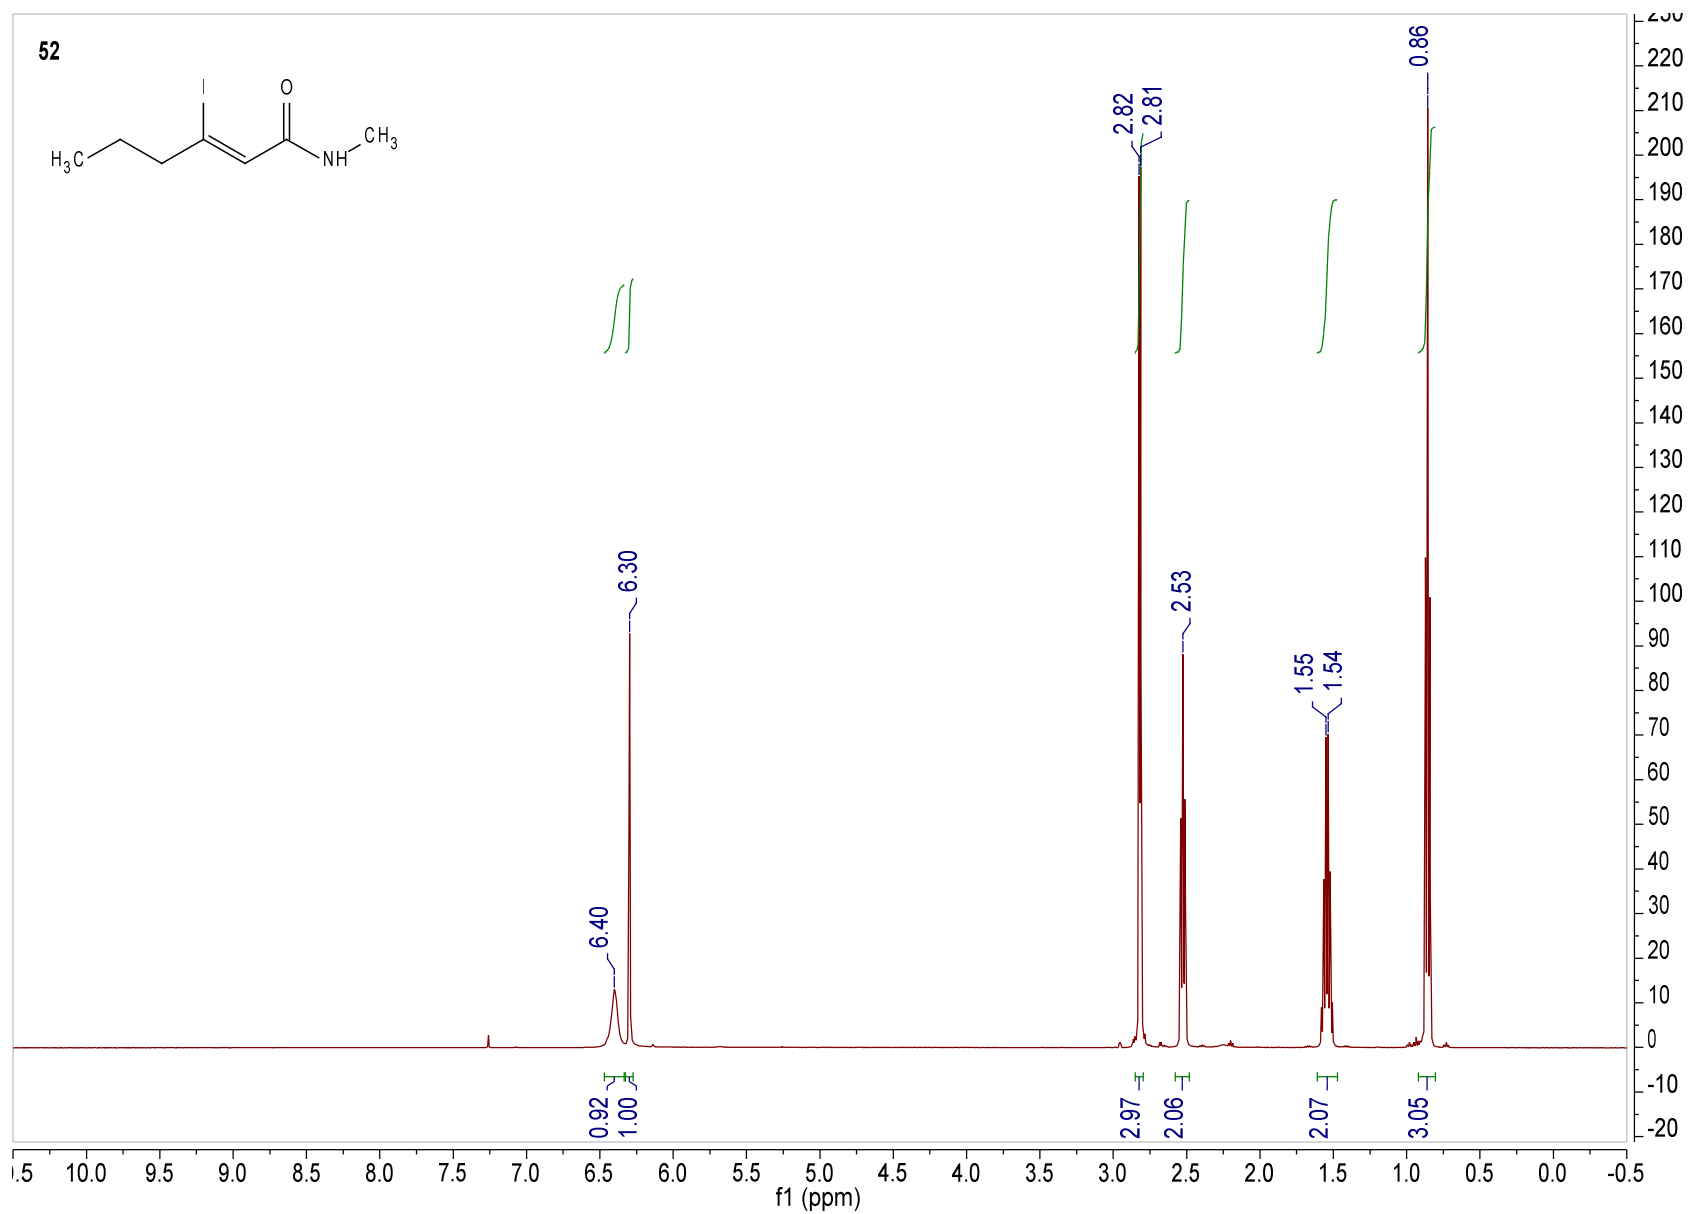

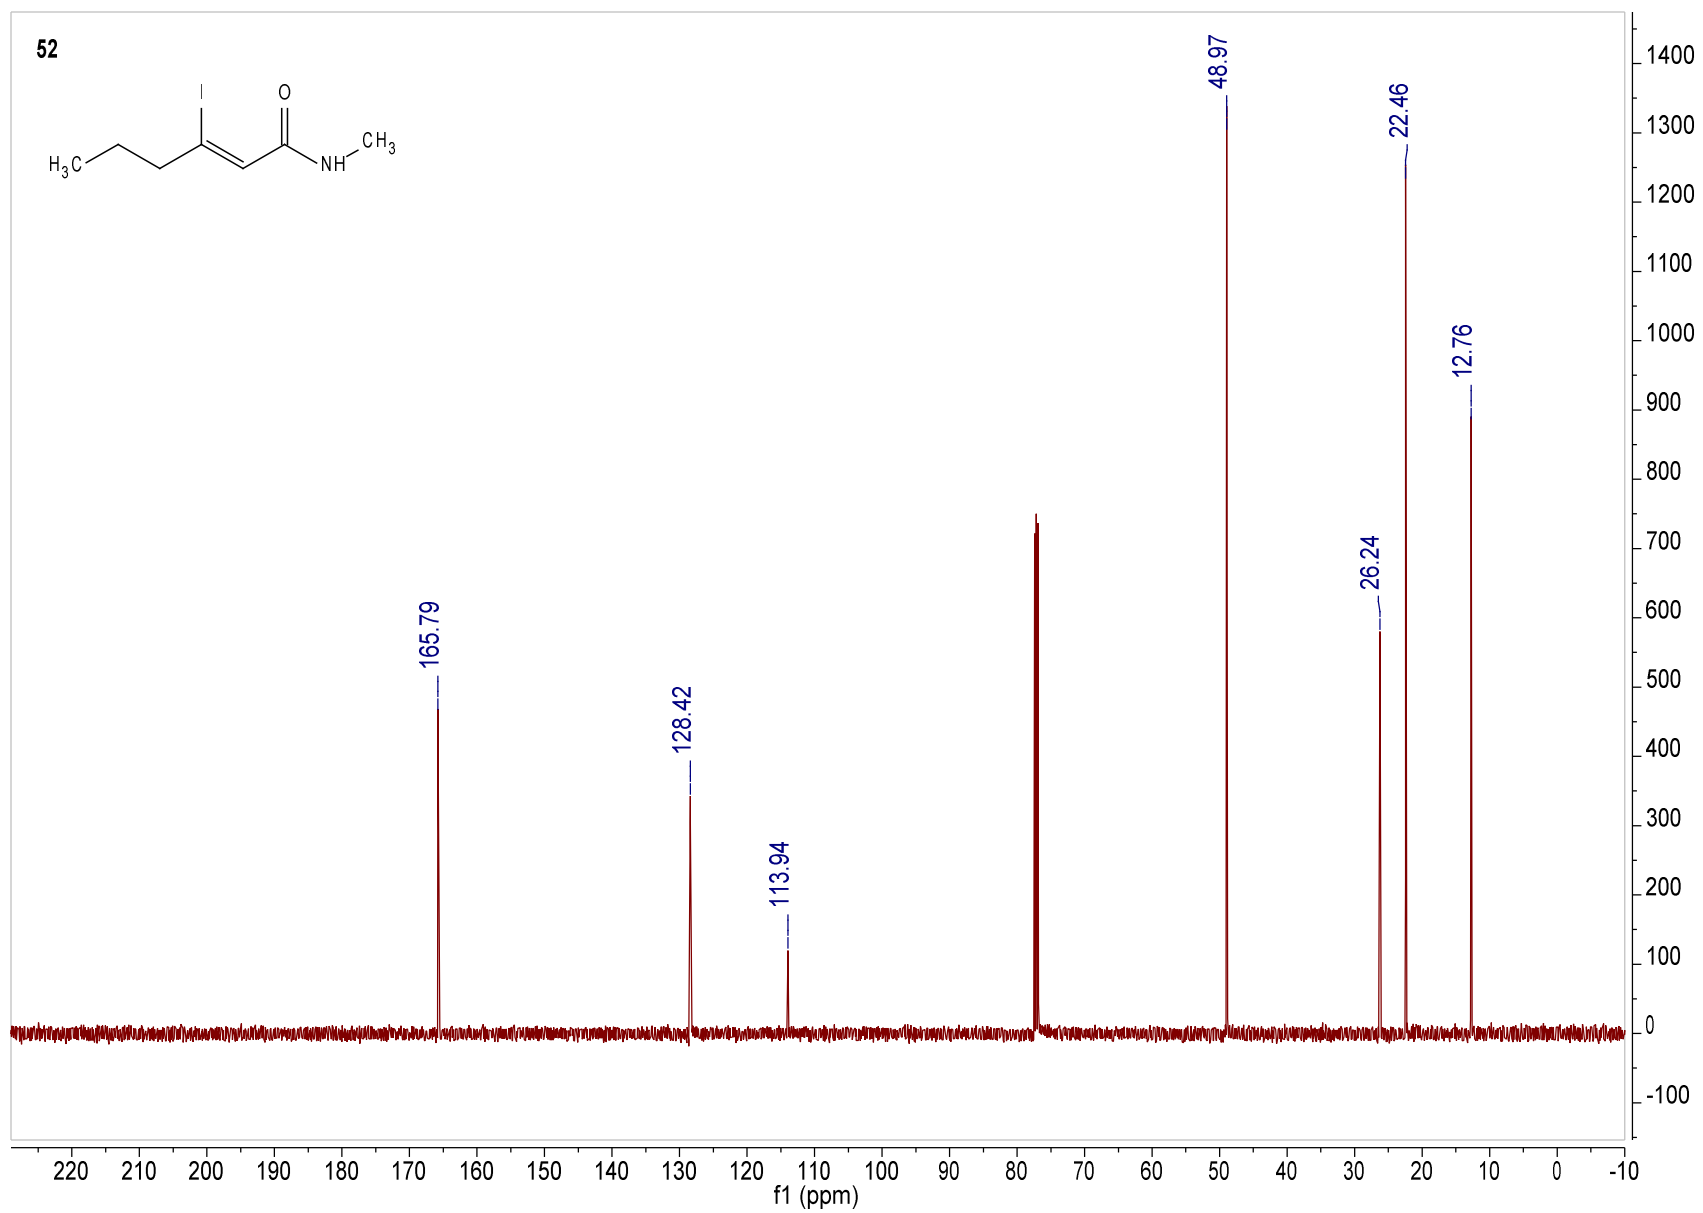

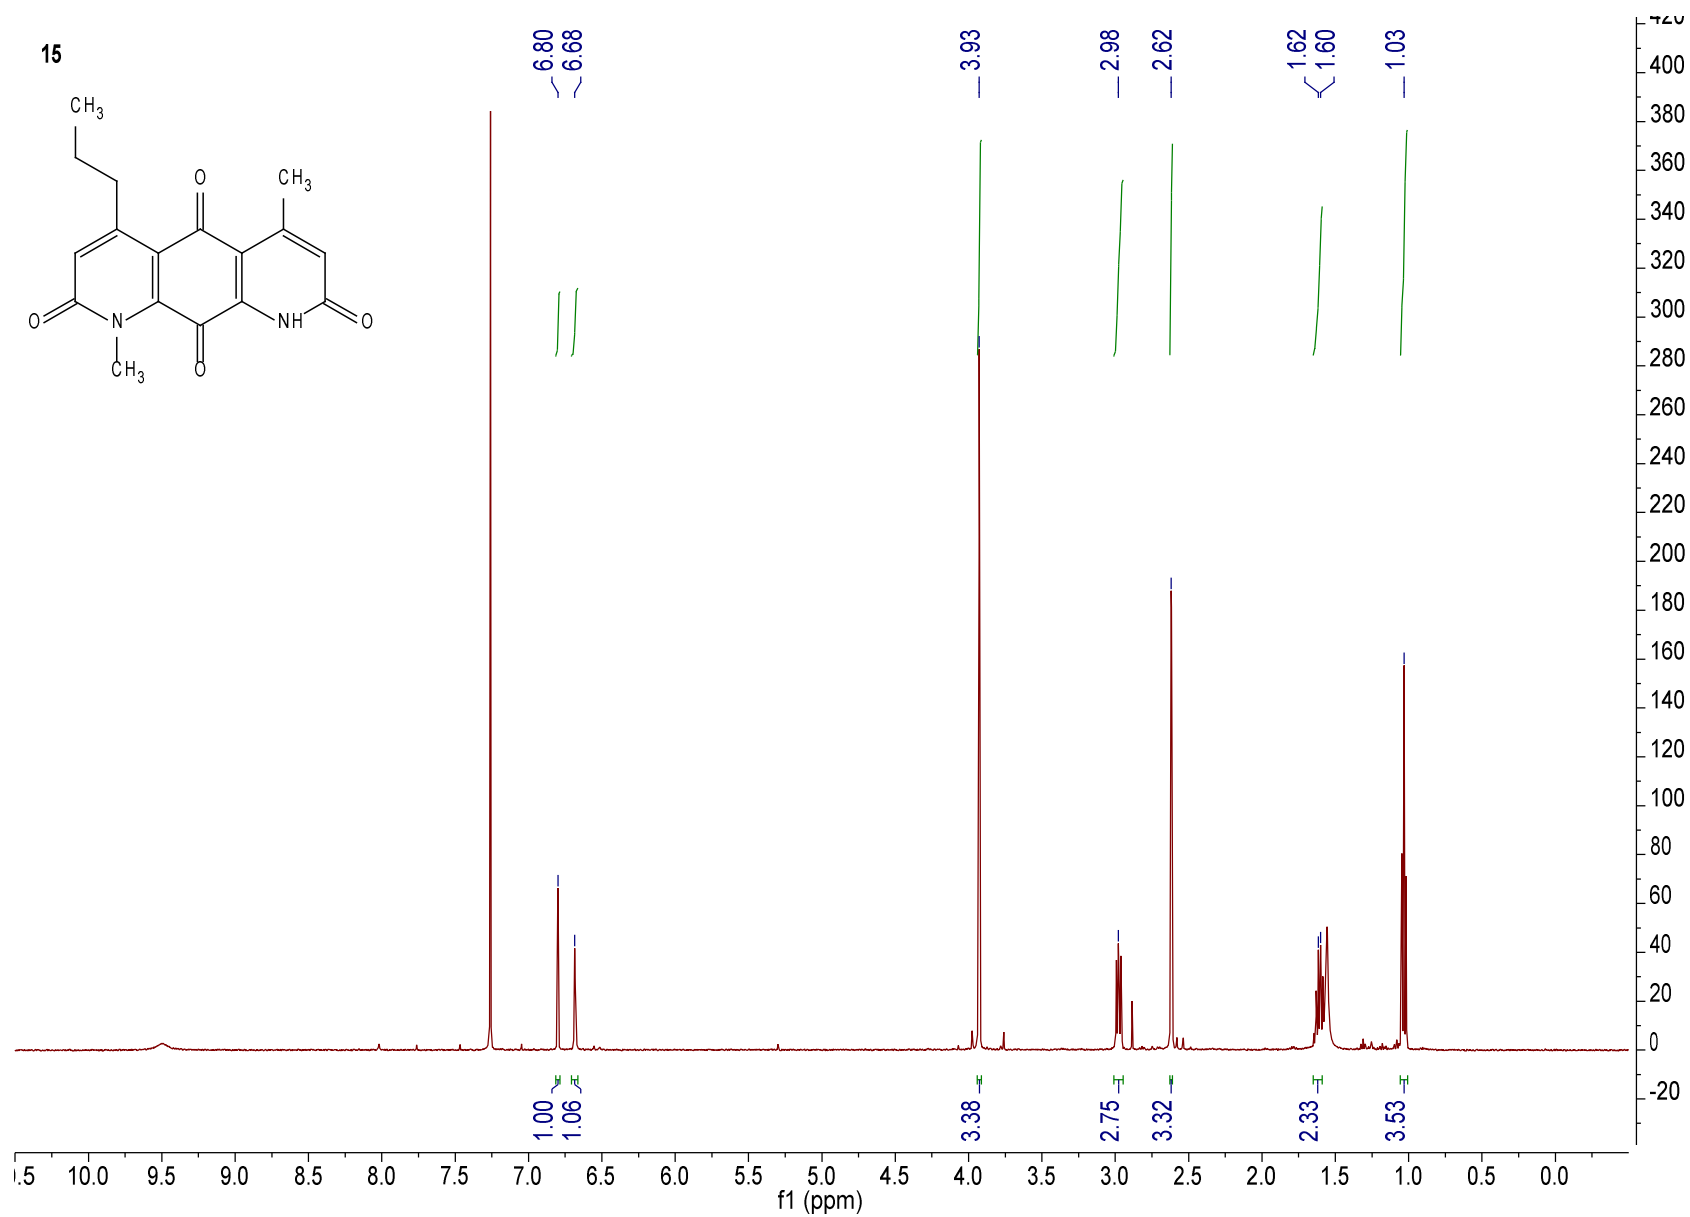

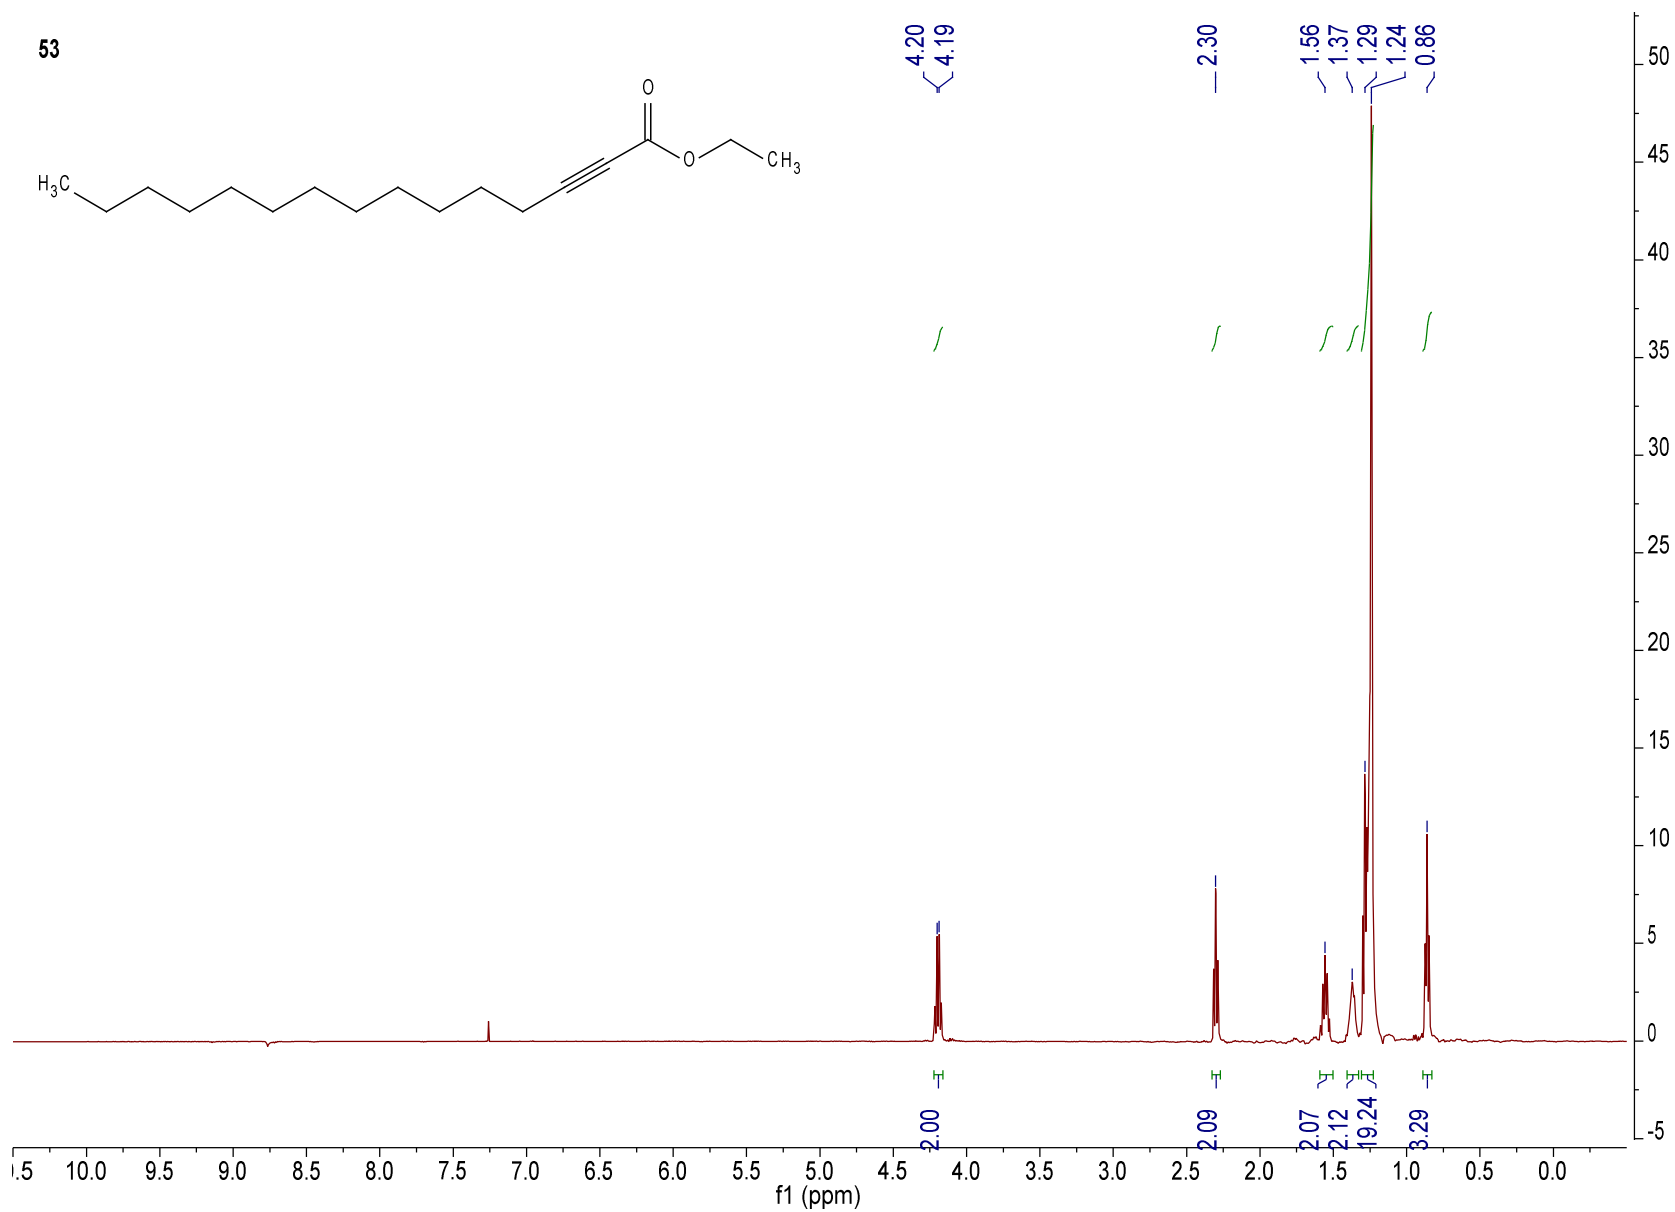

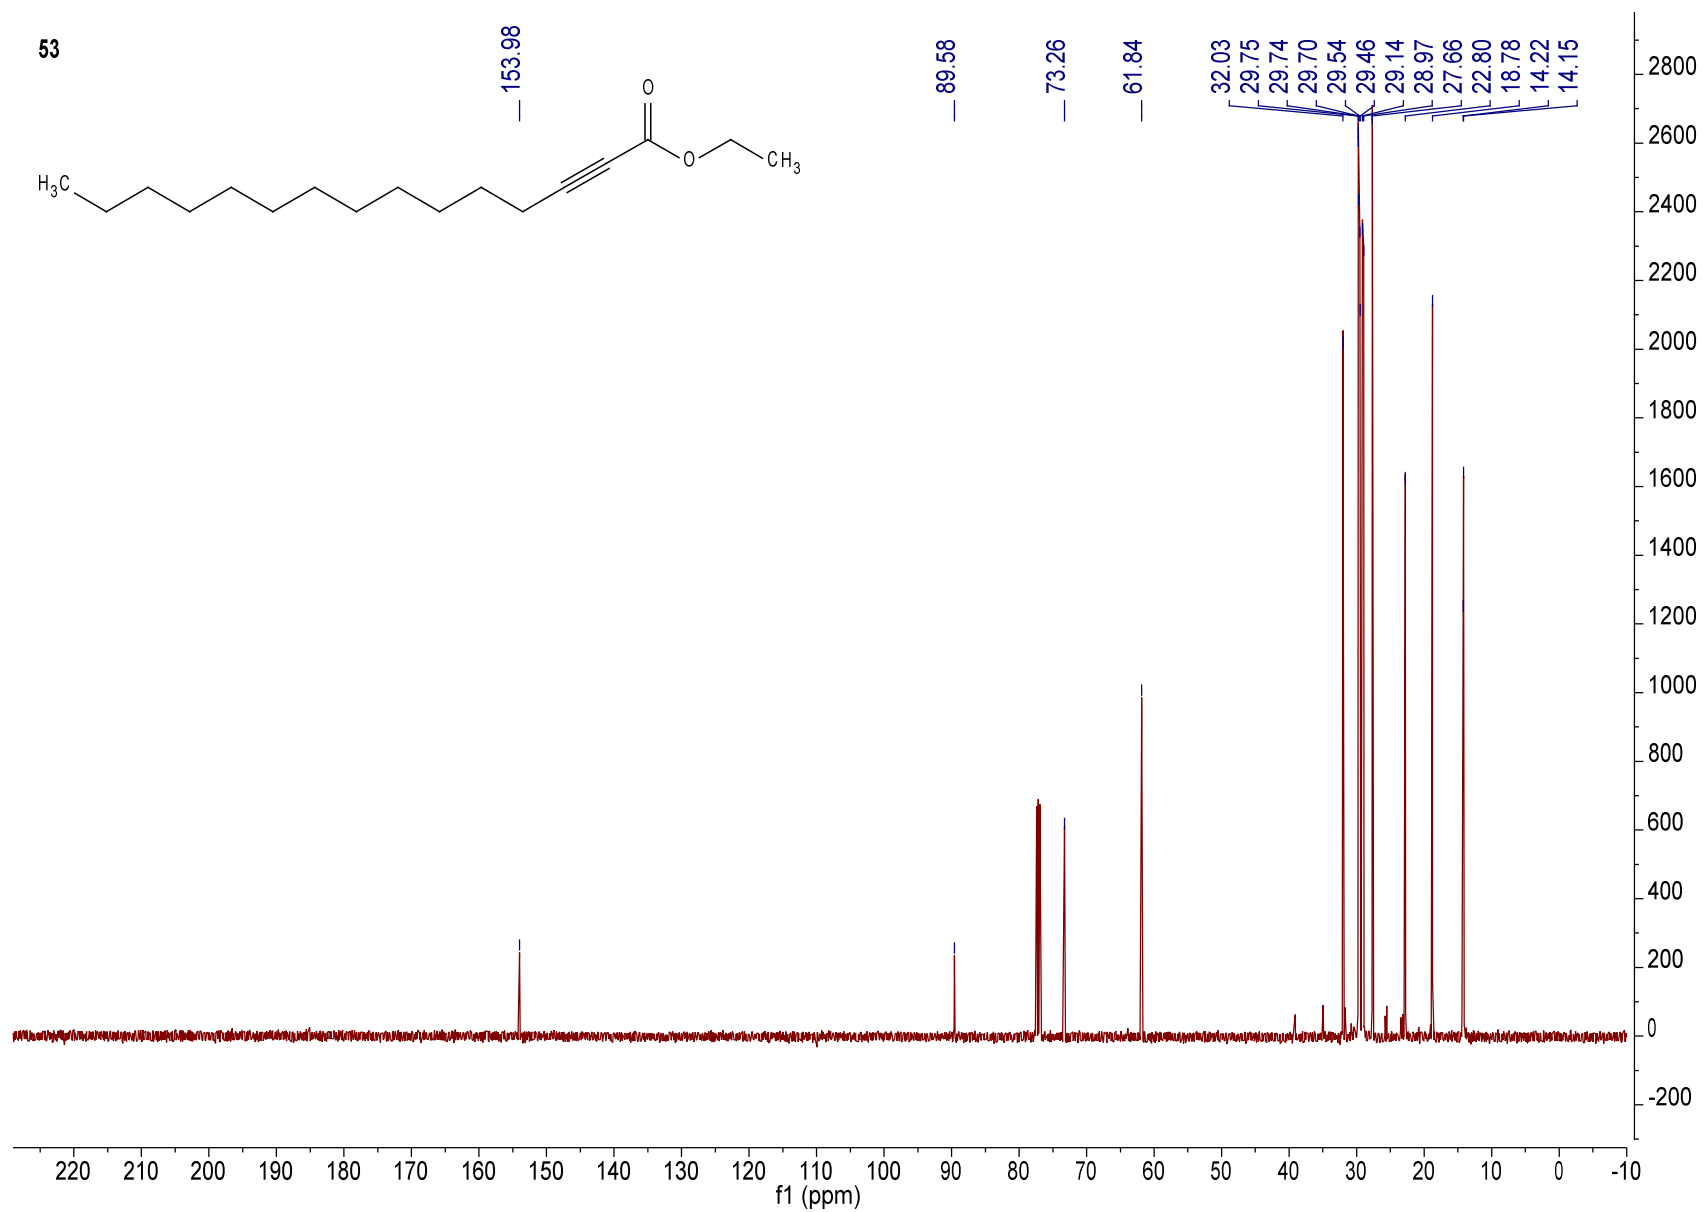

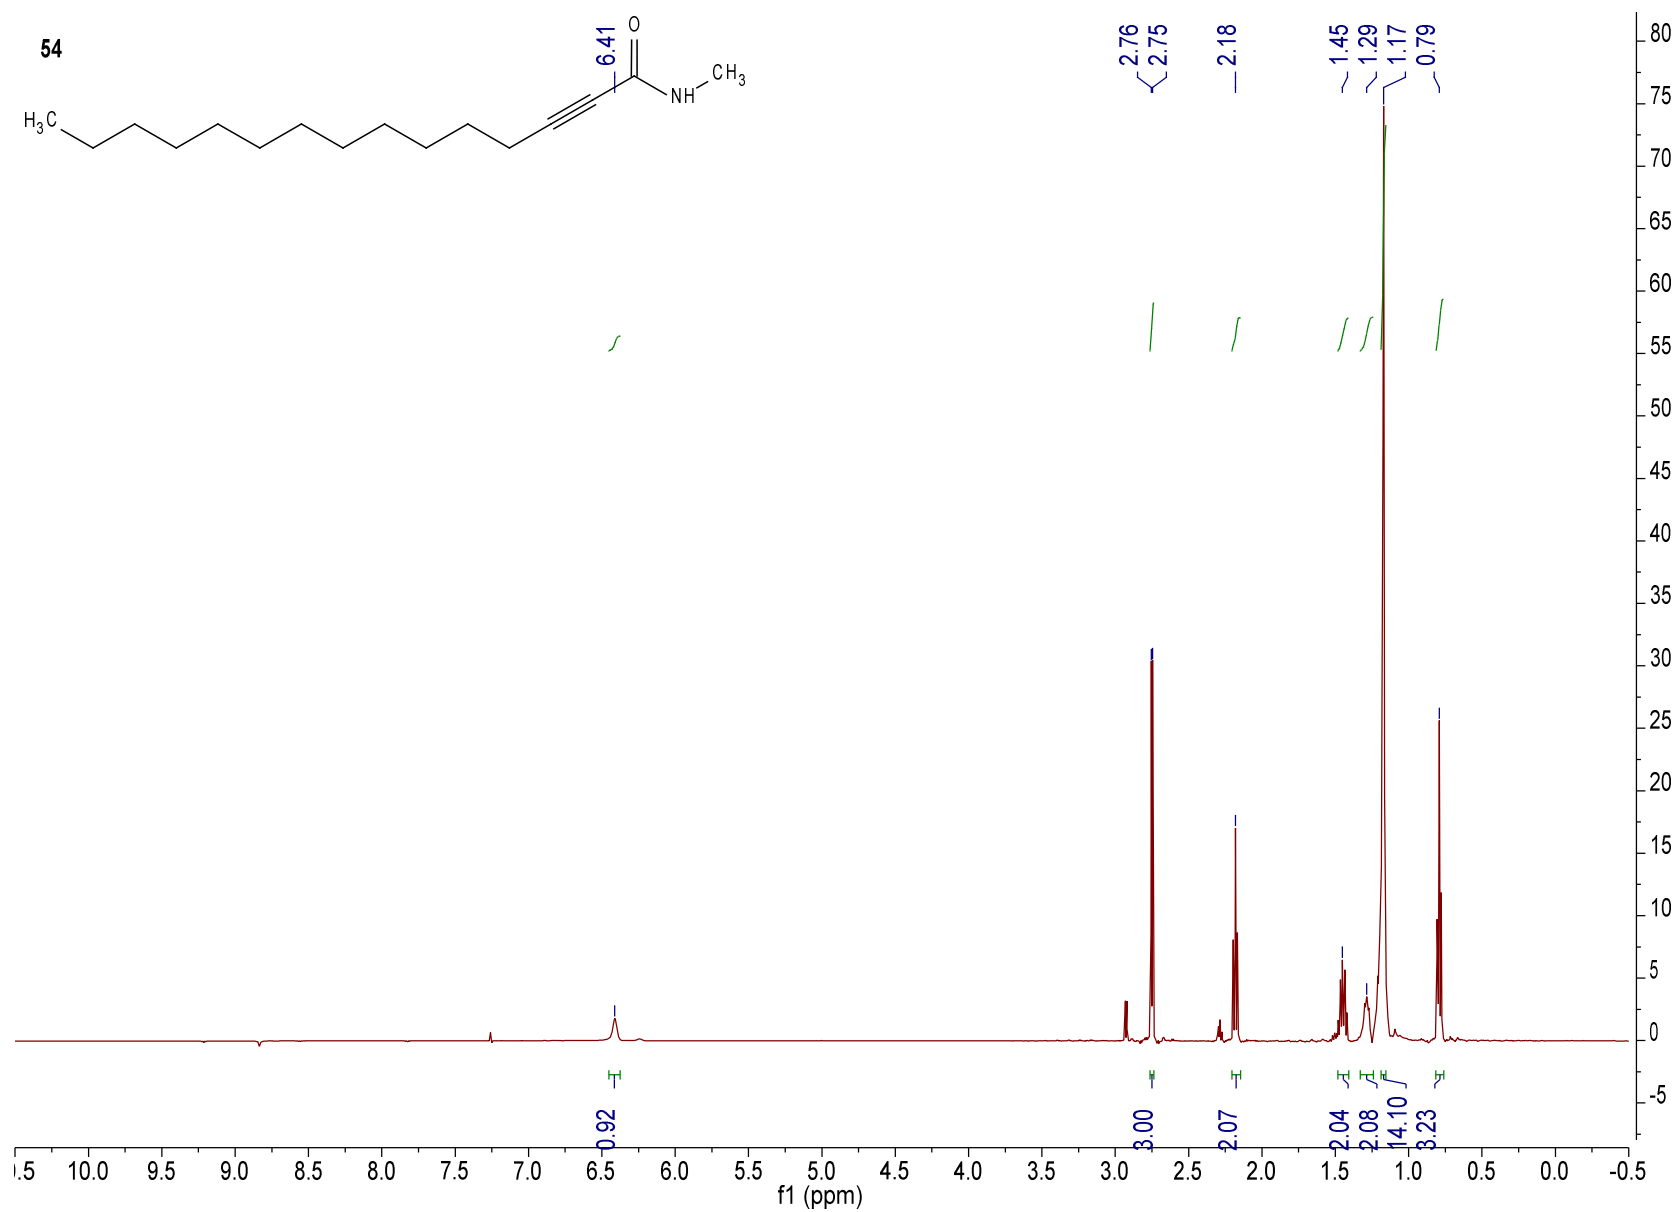



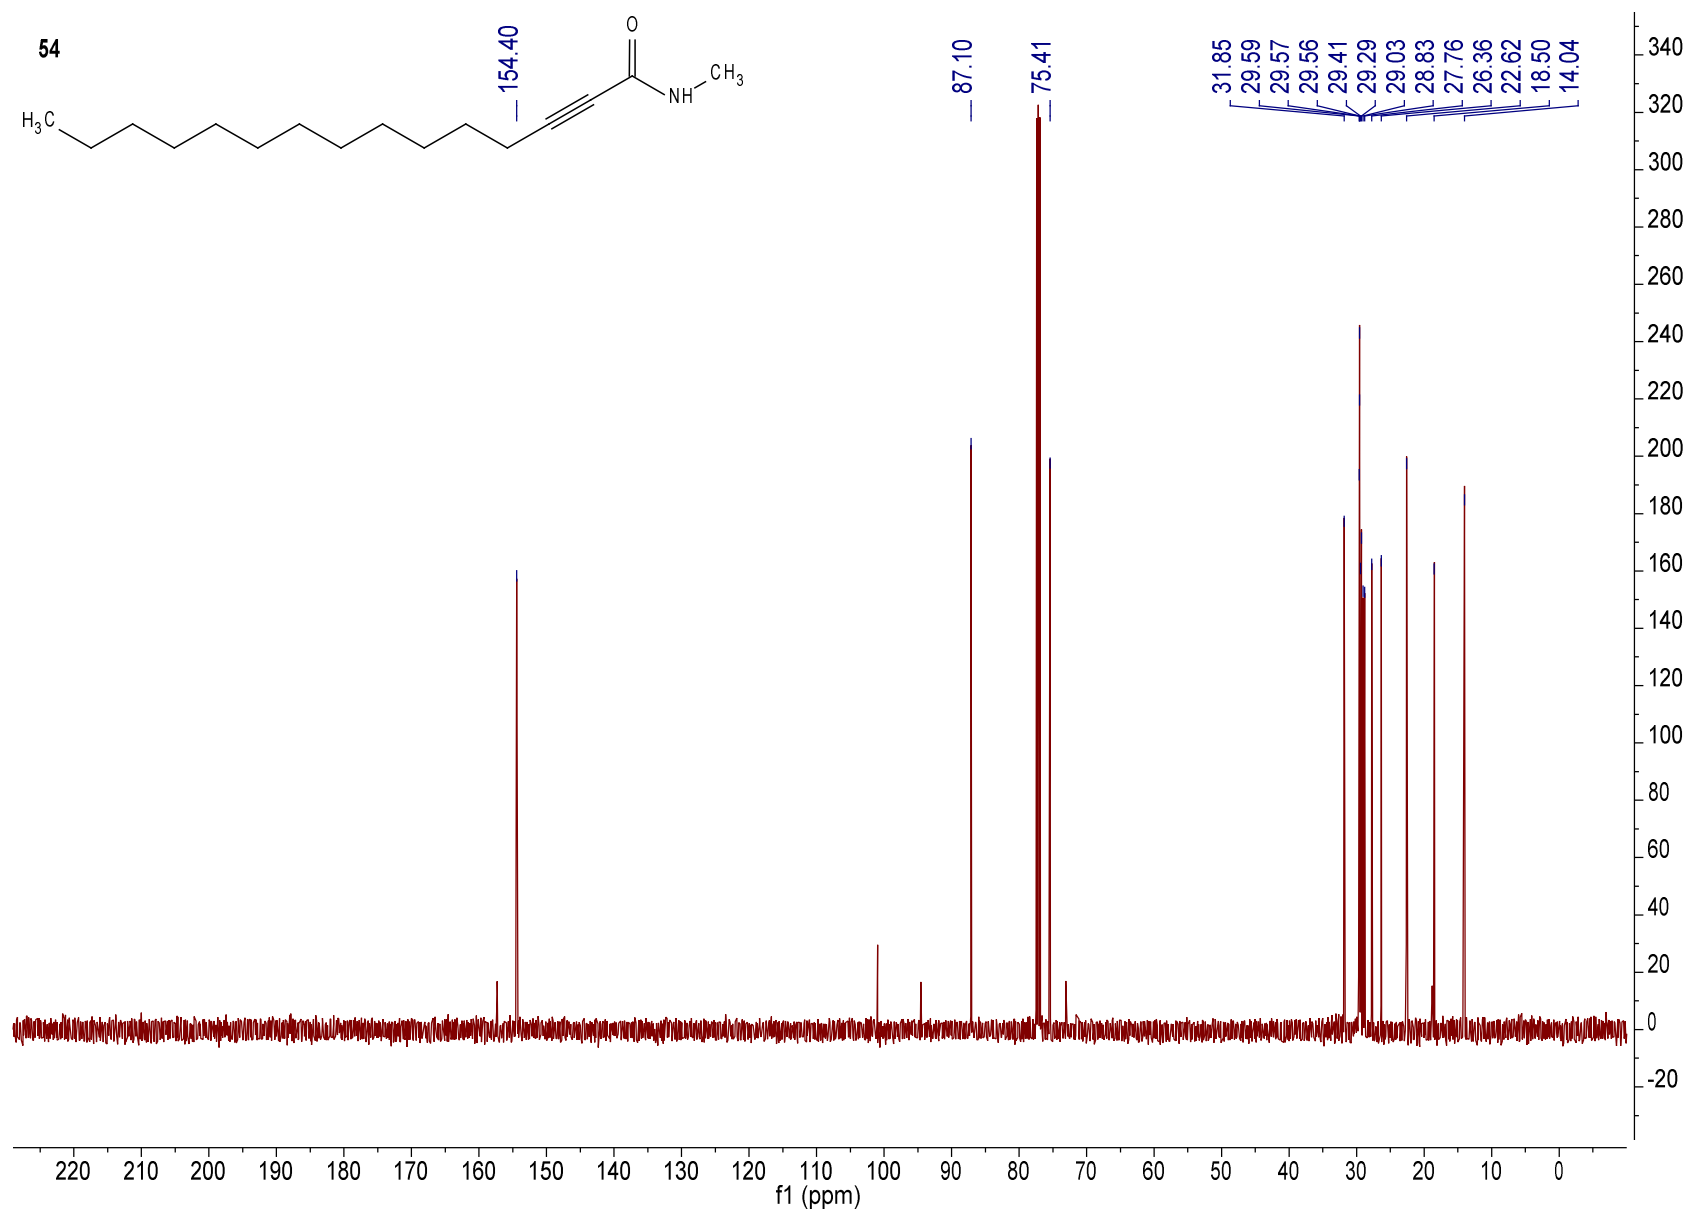

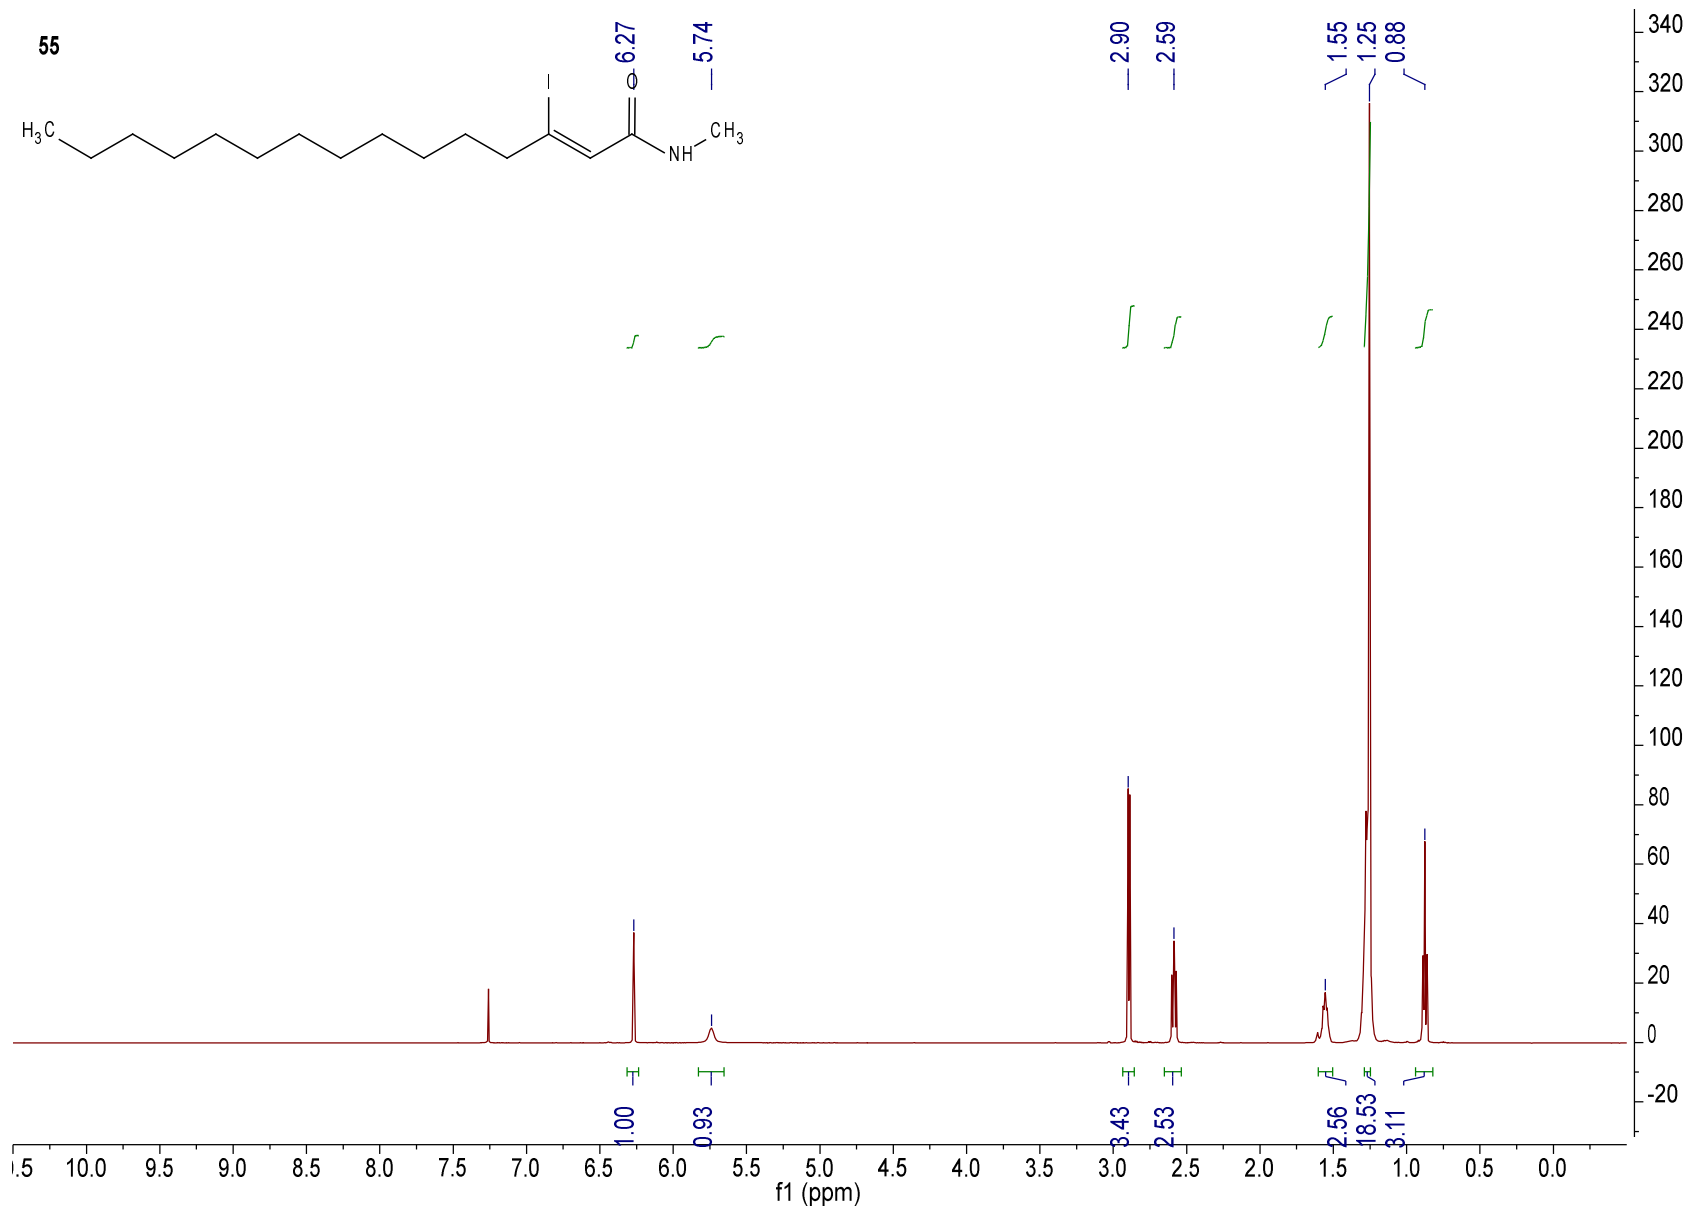

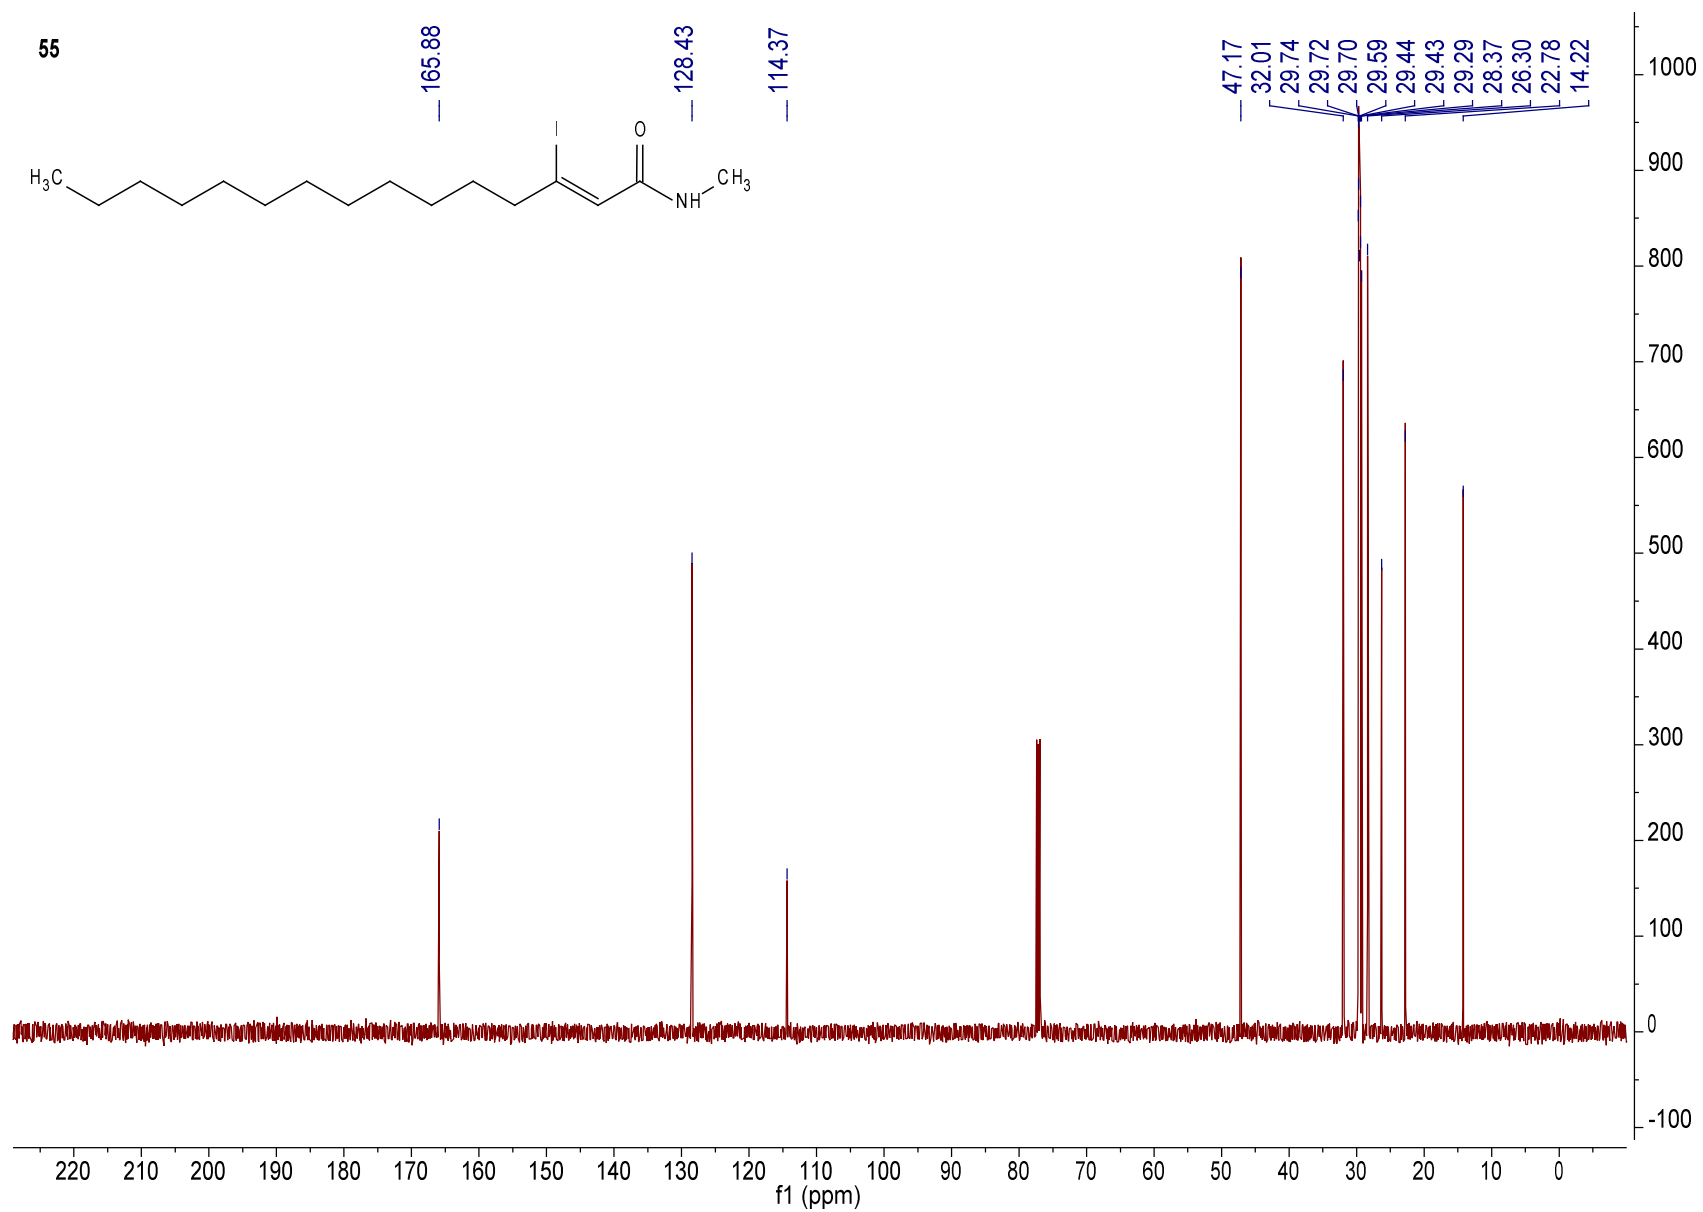

16

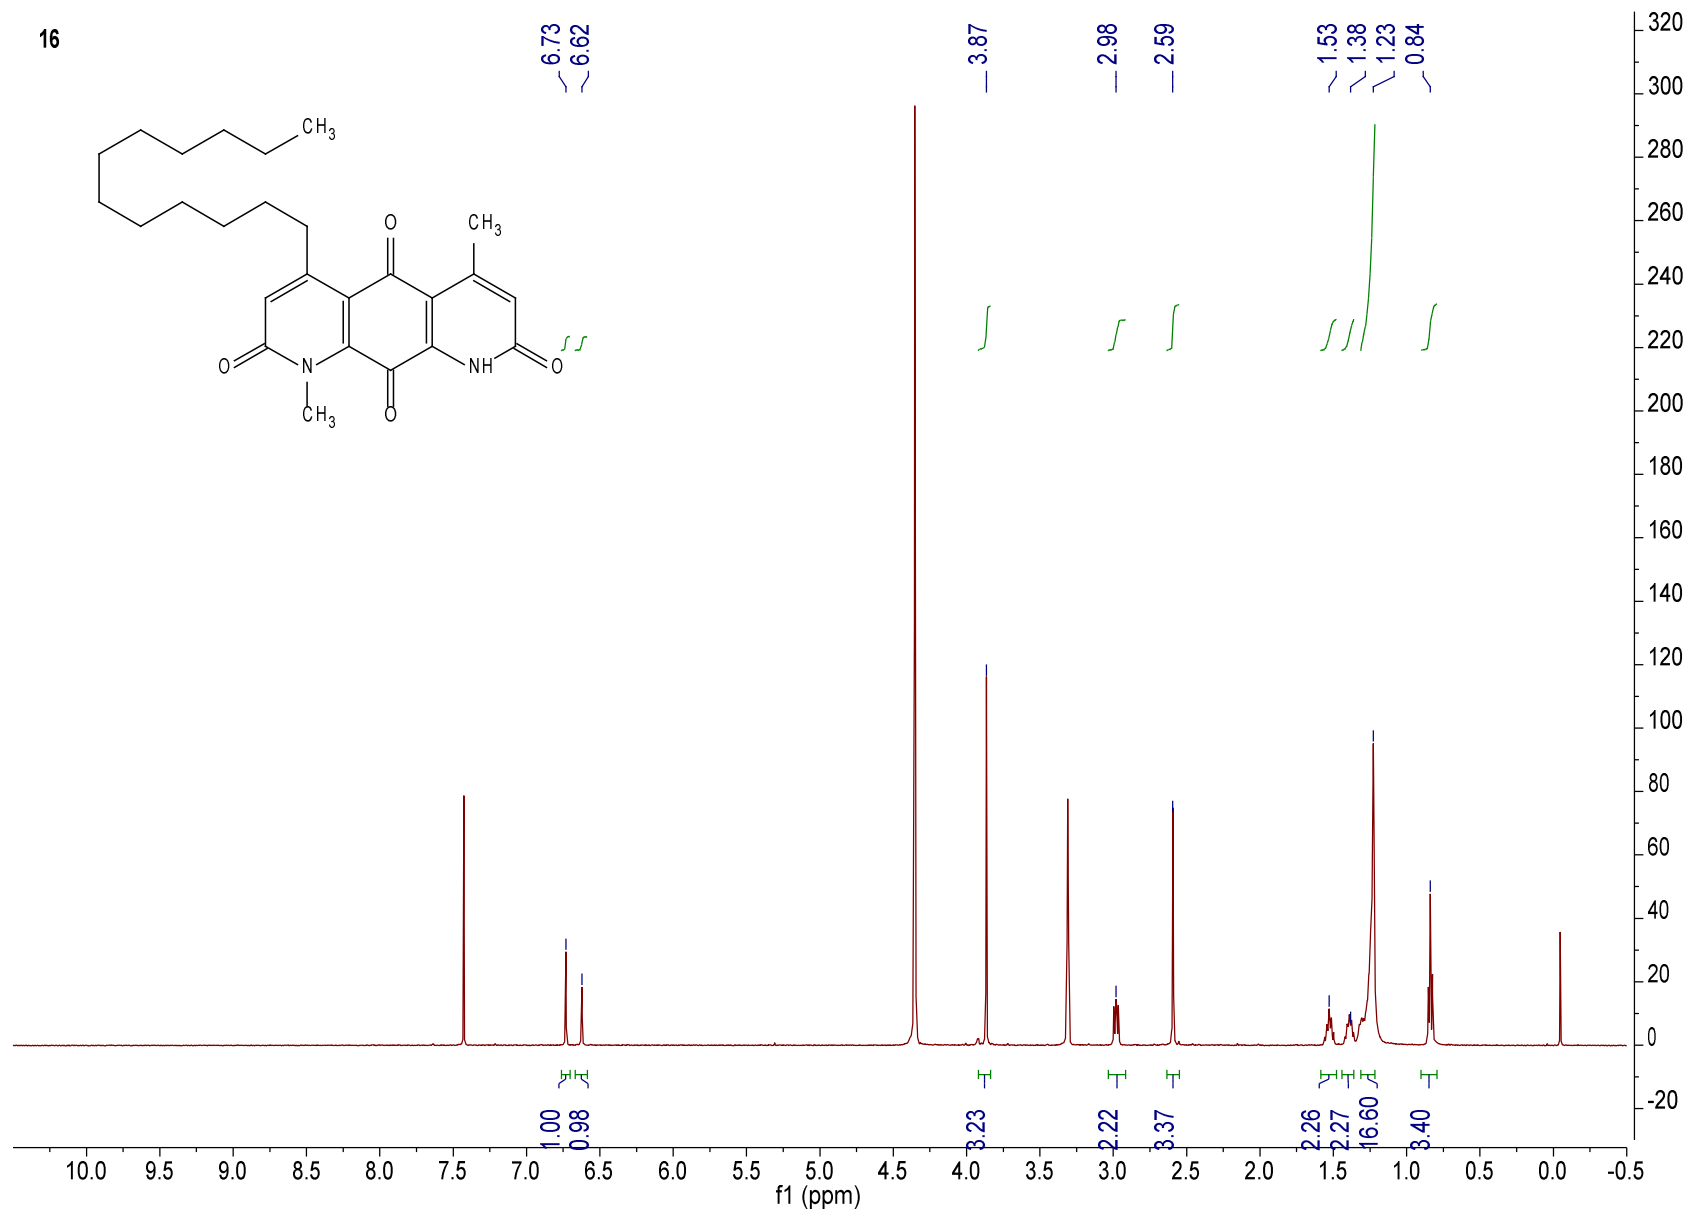

16

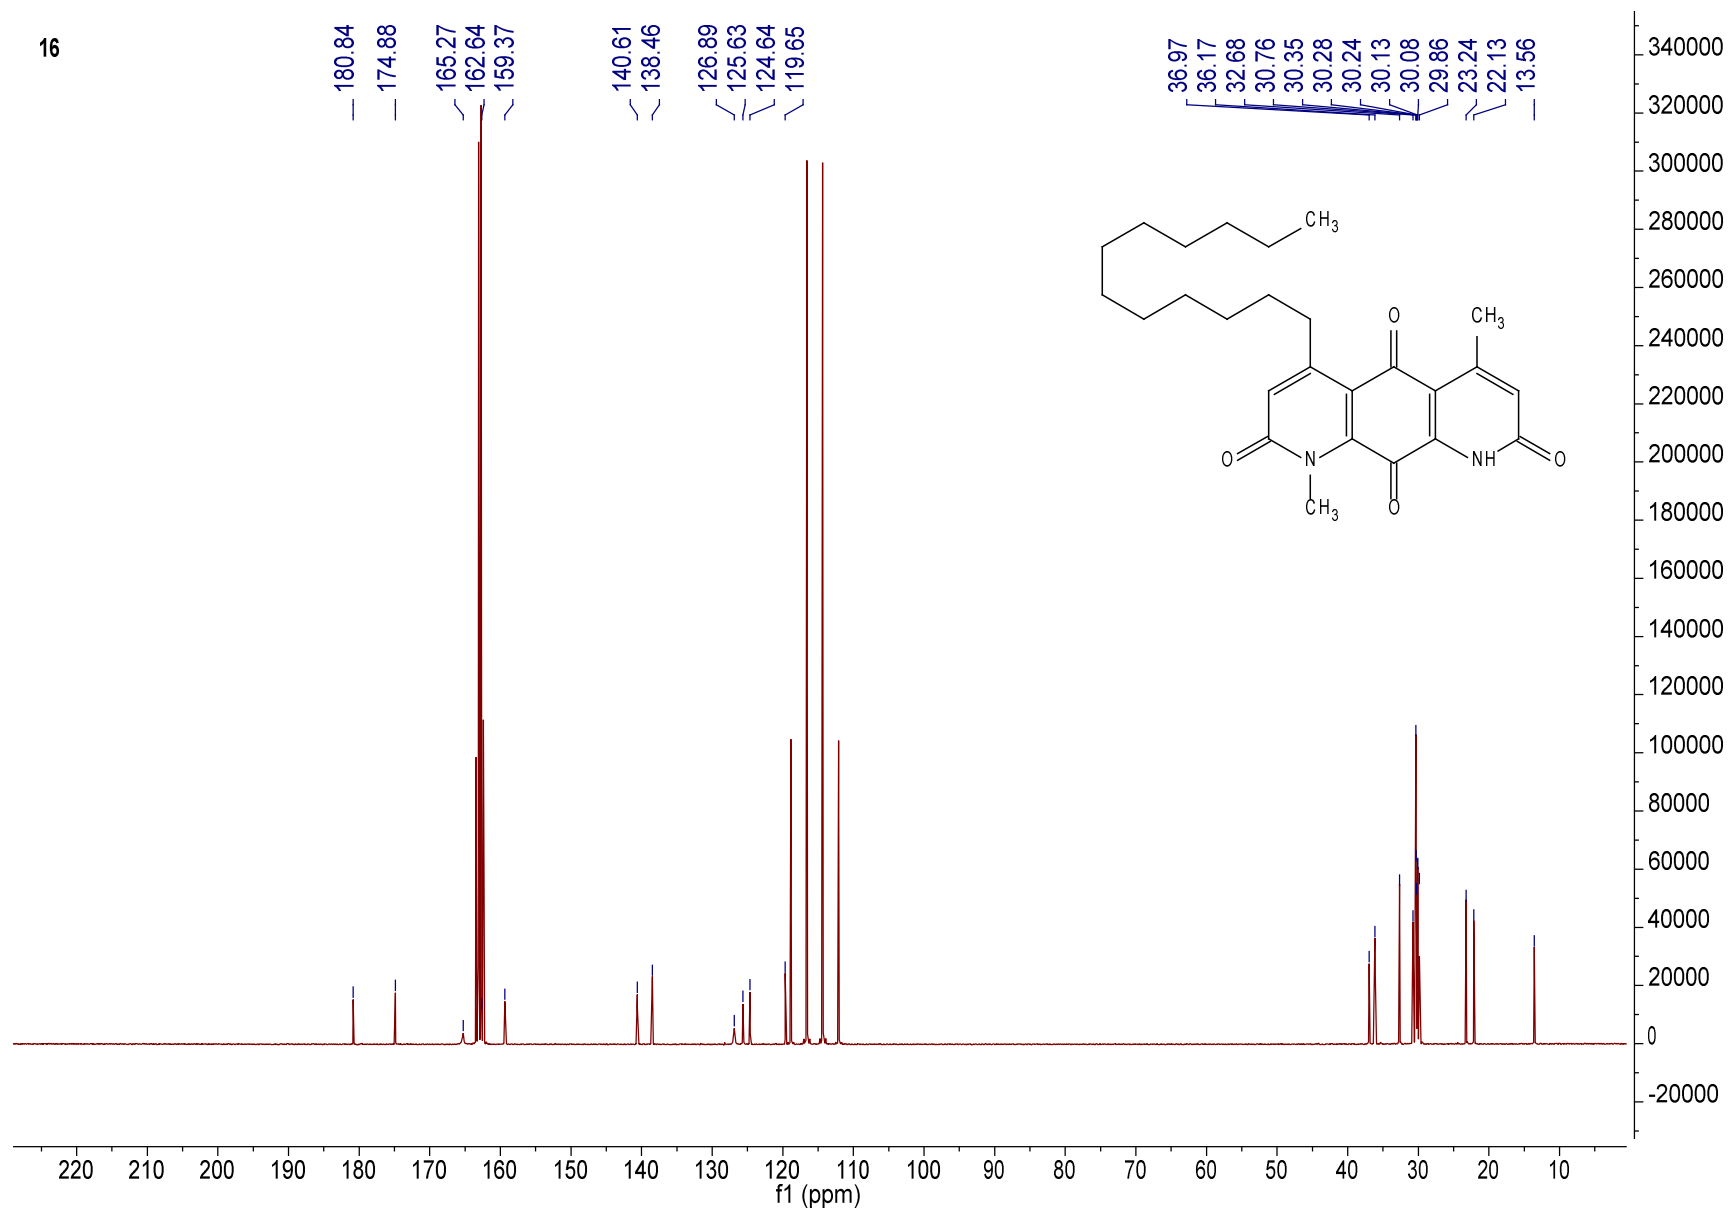

S141

17

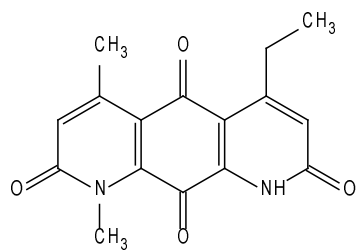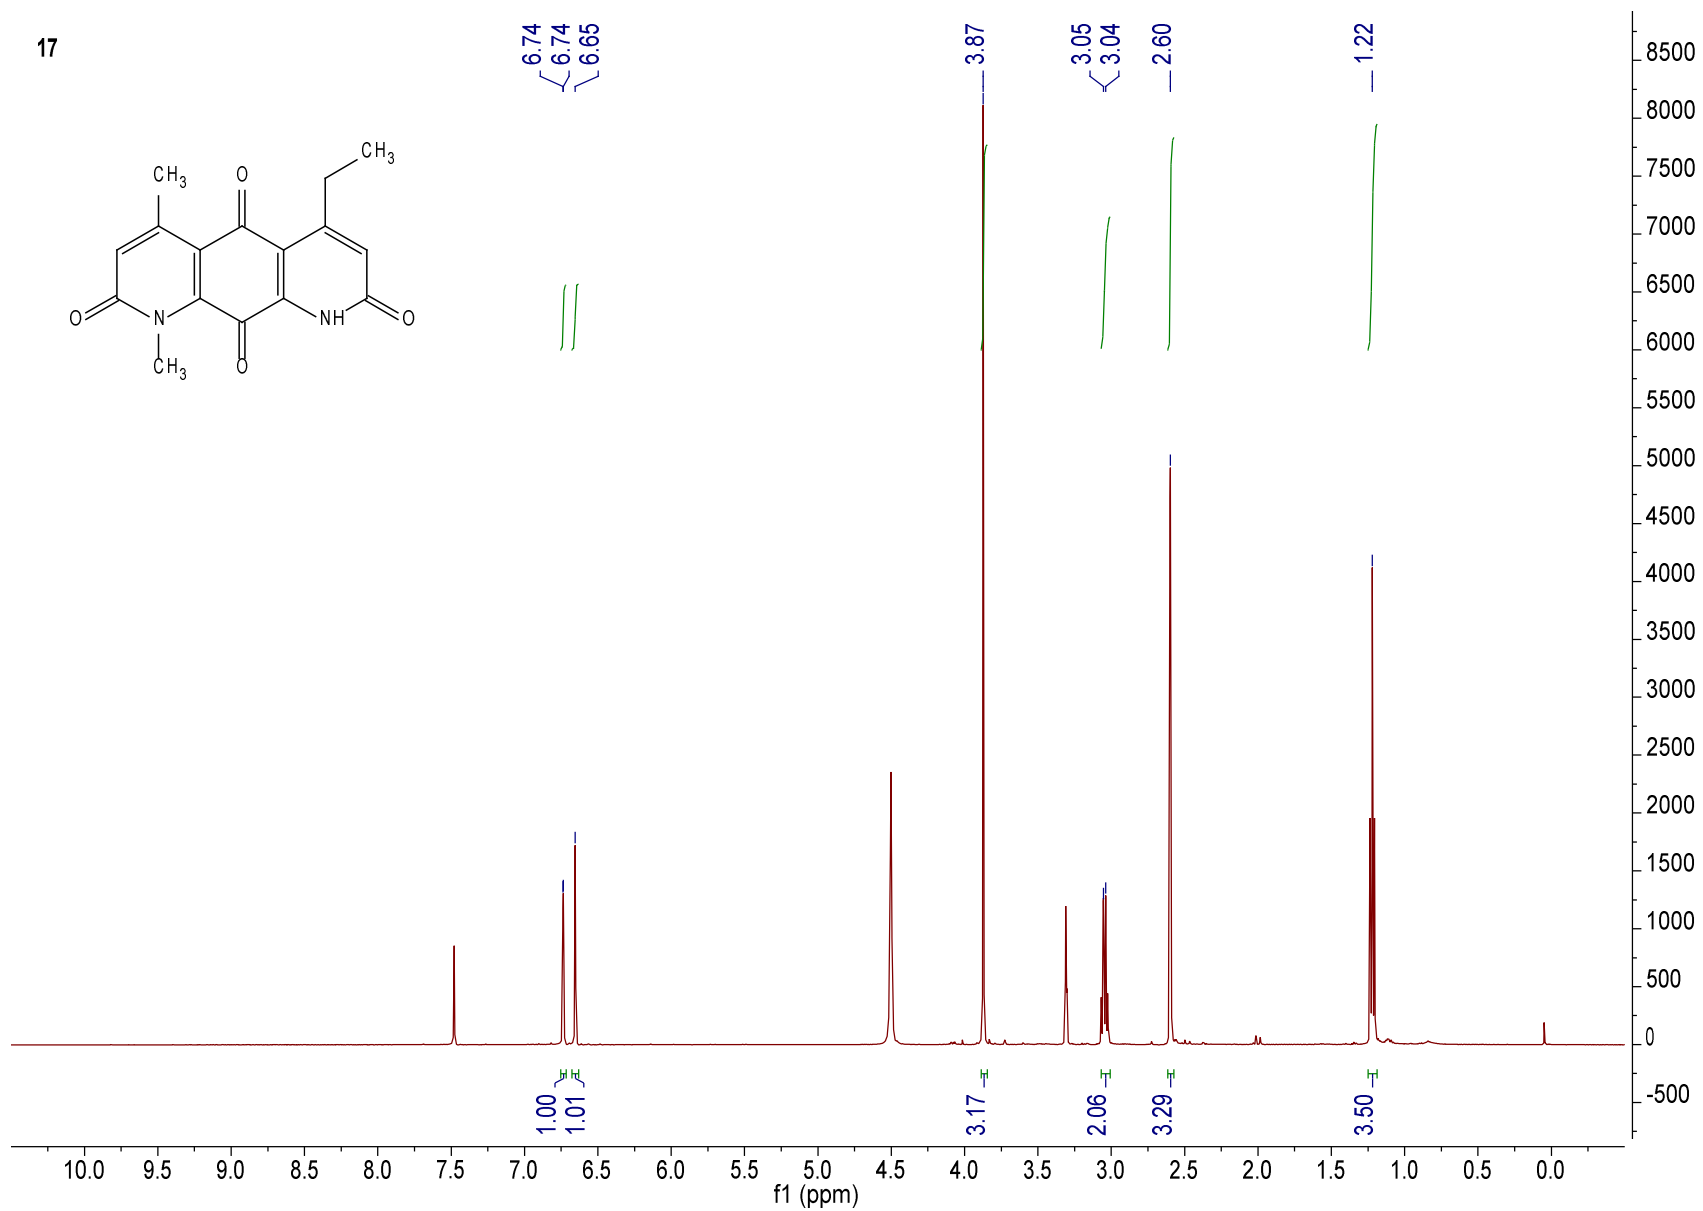

17

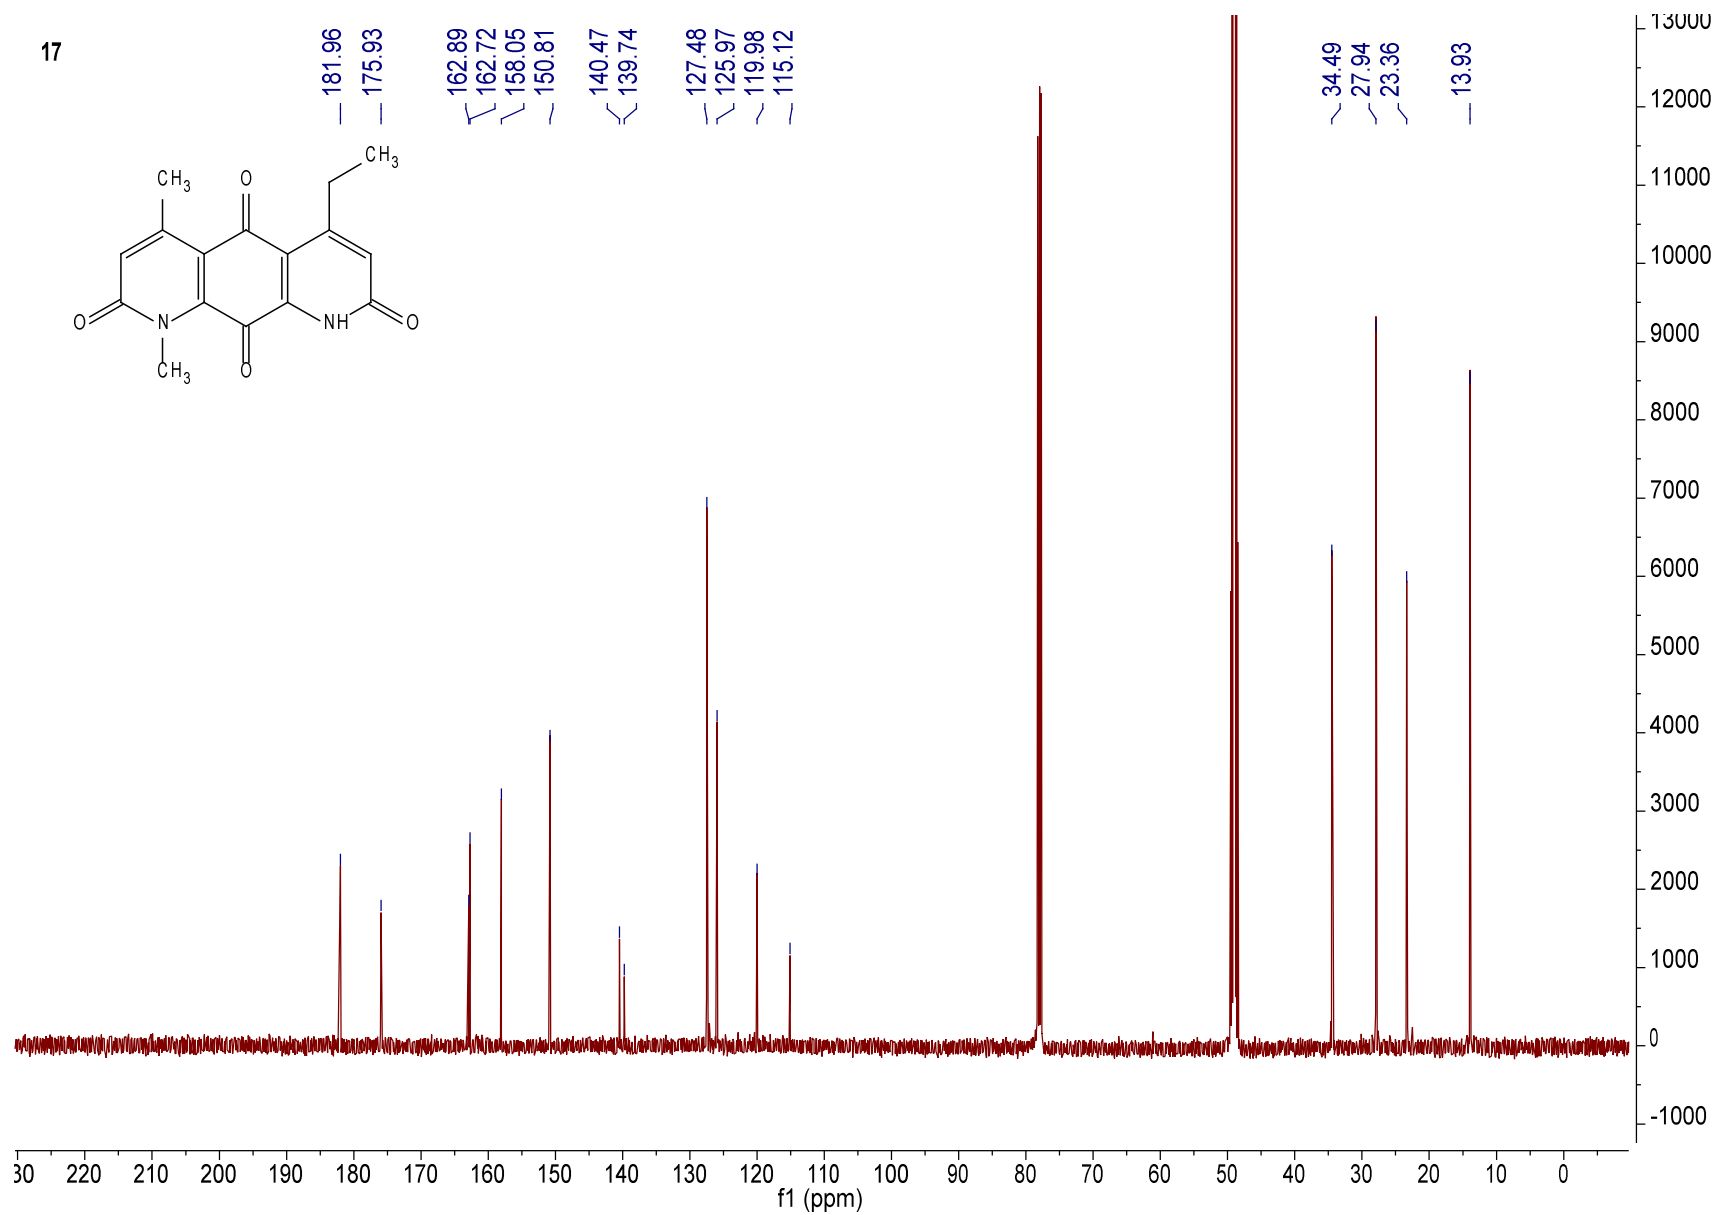

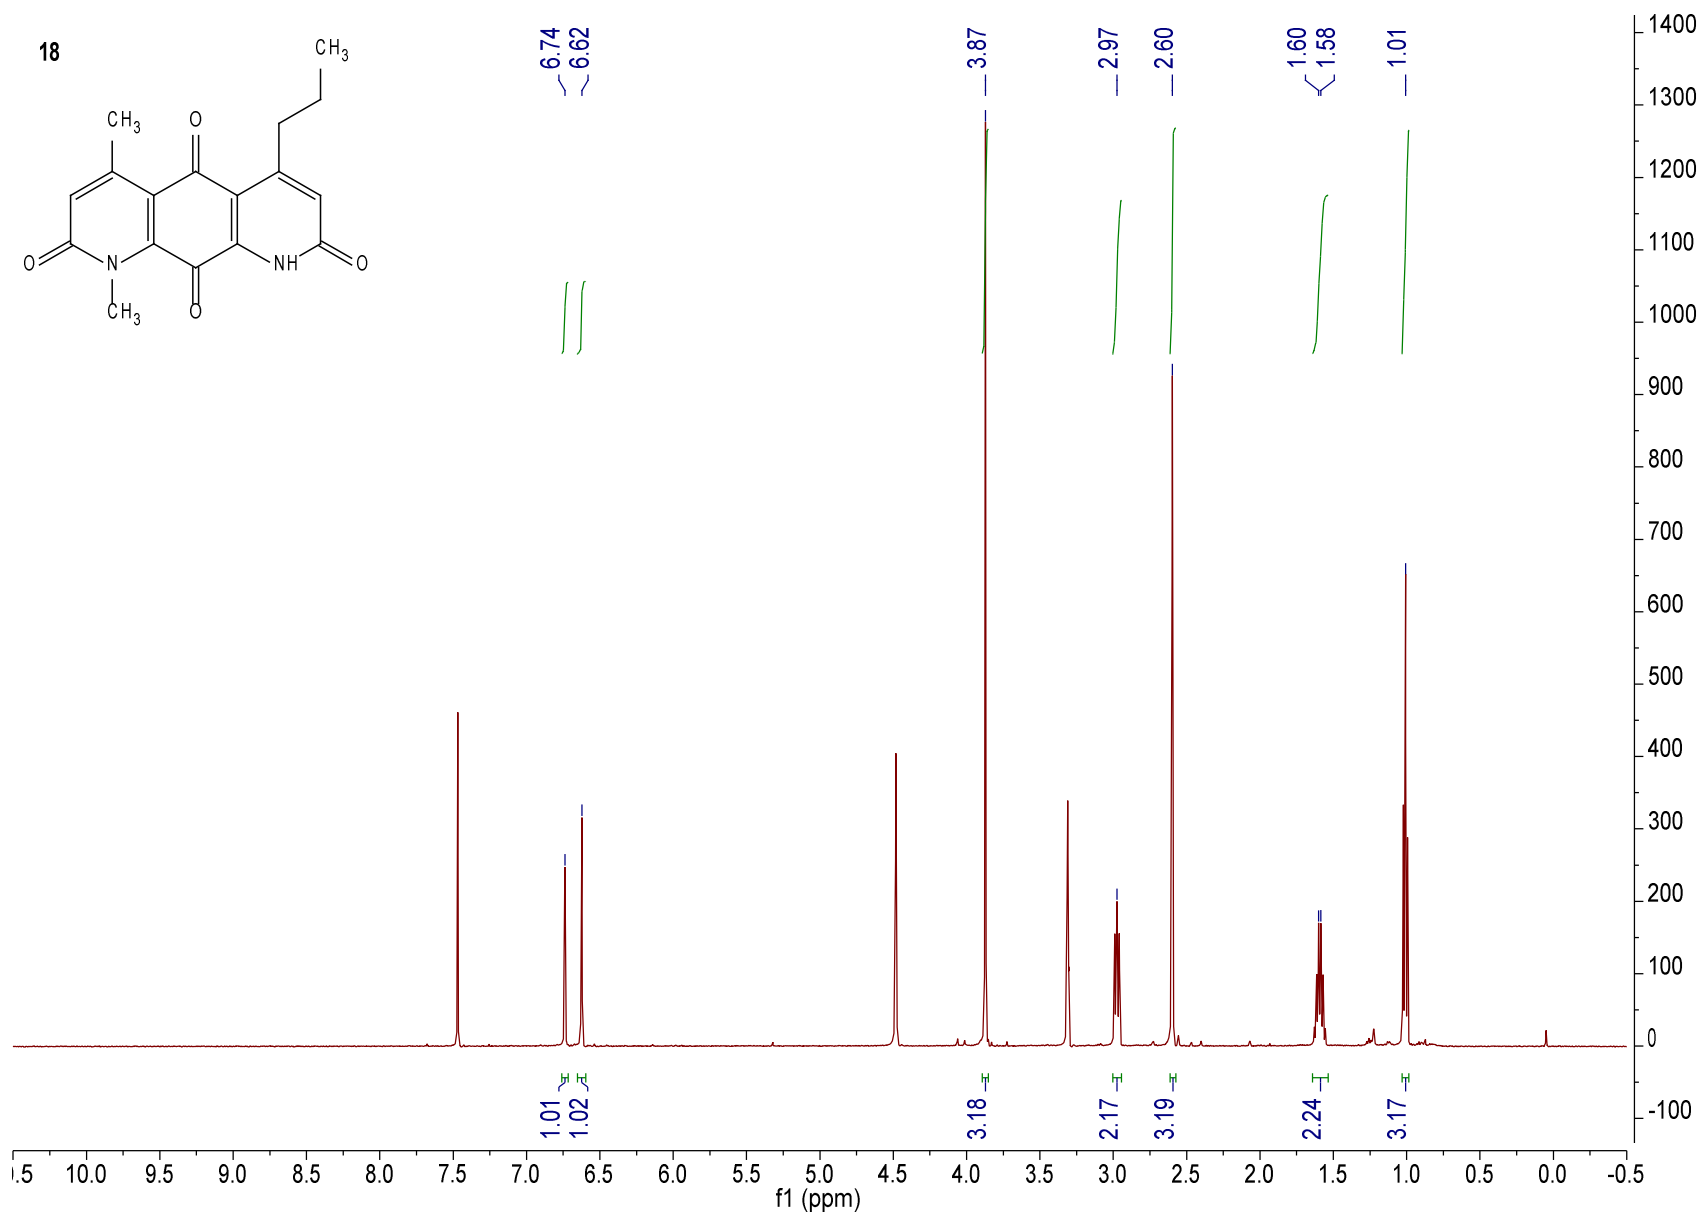



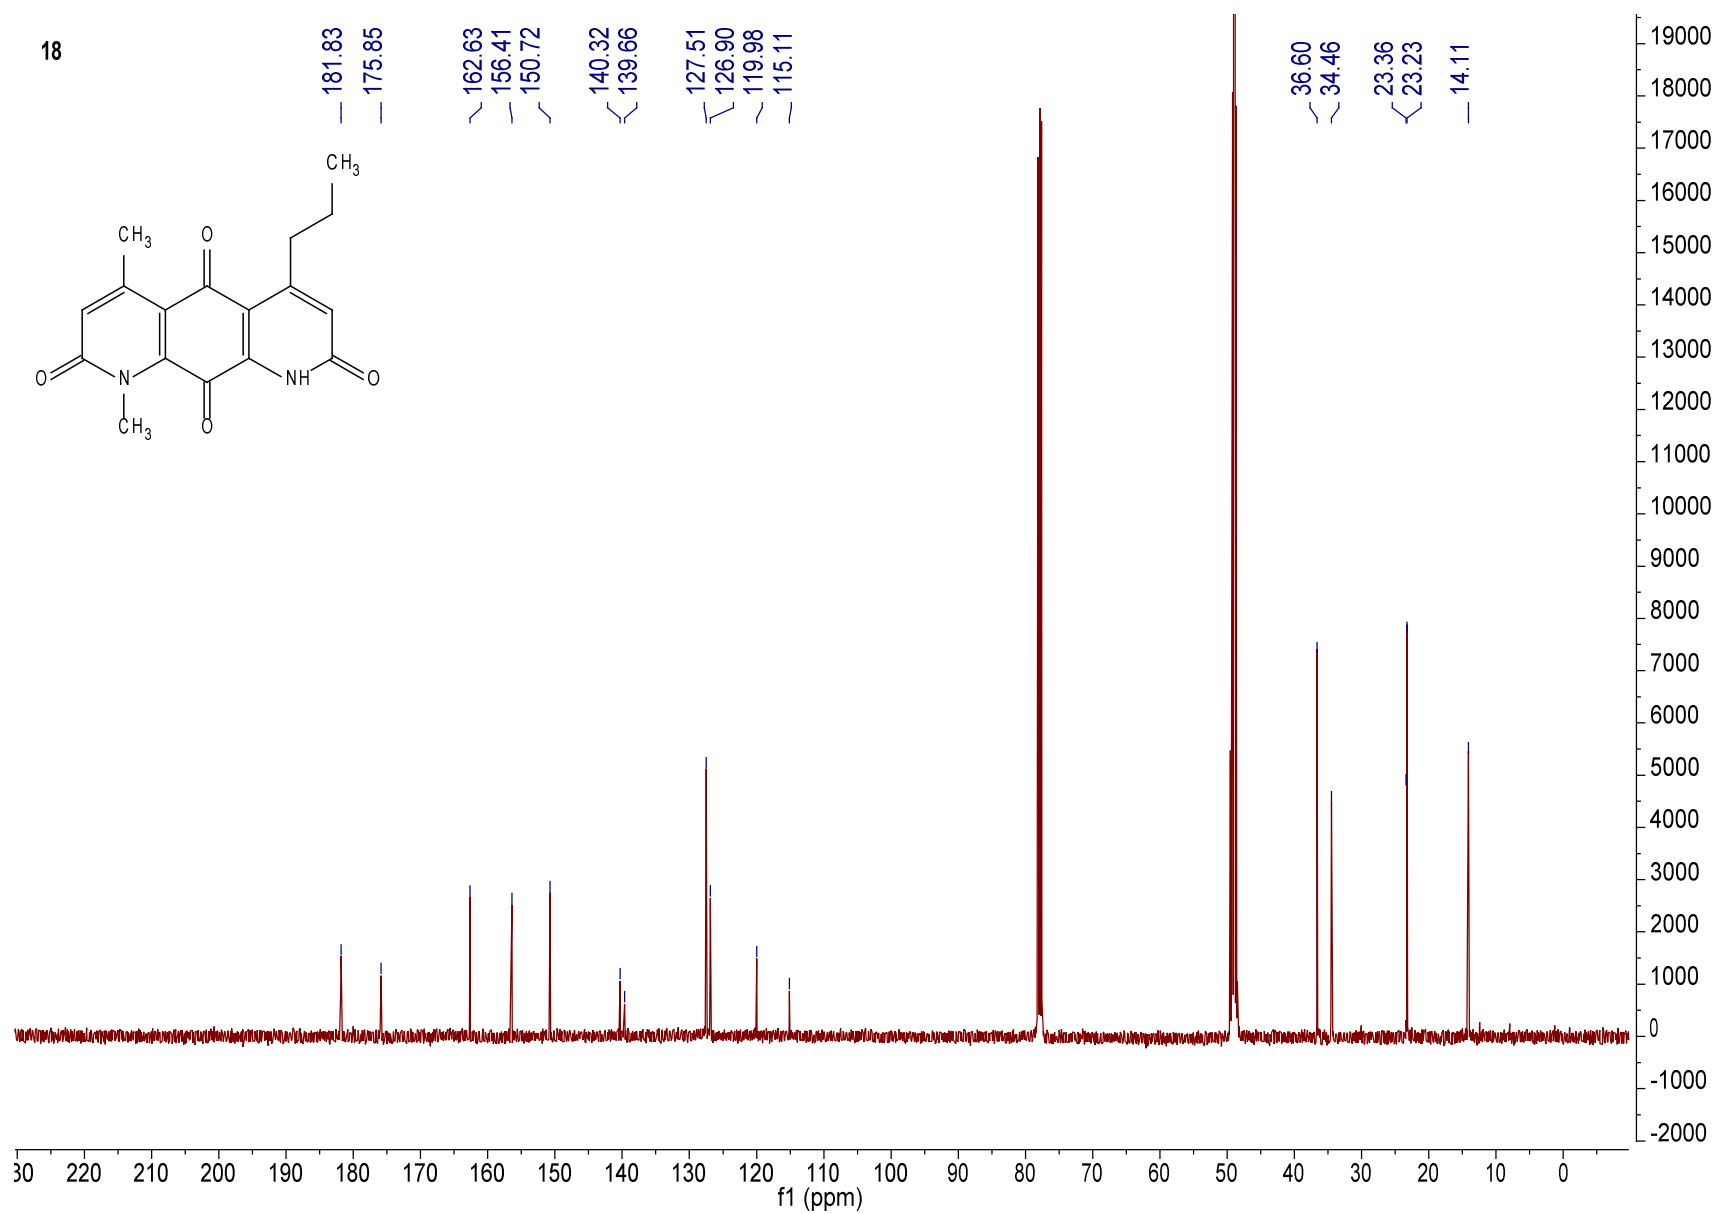

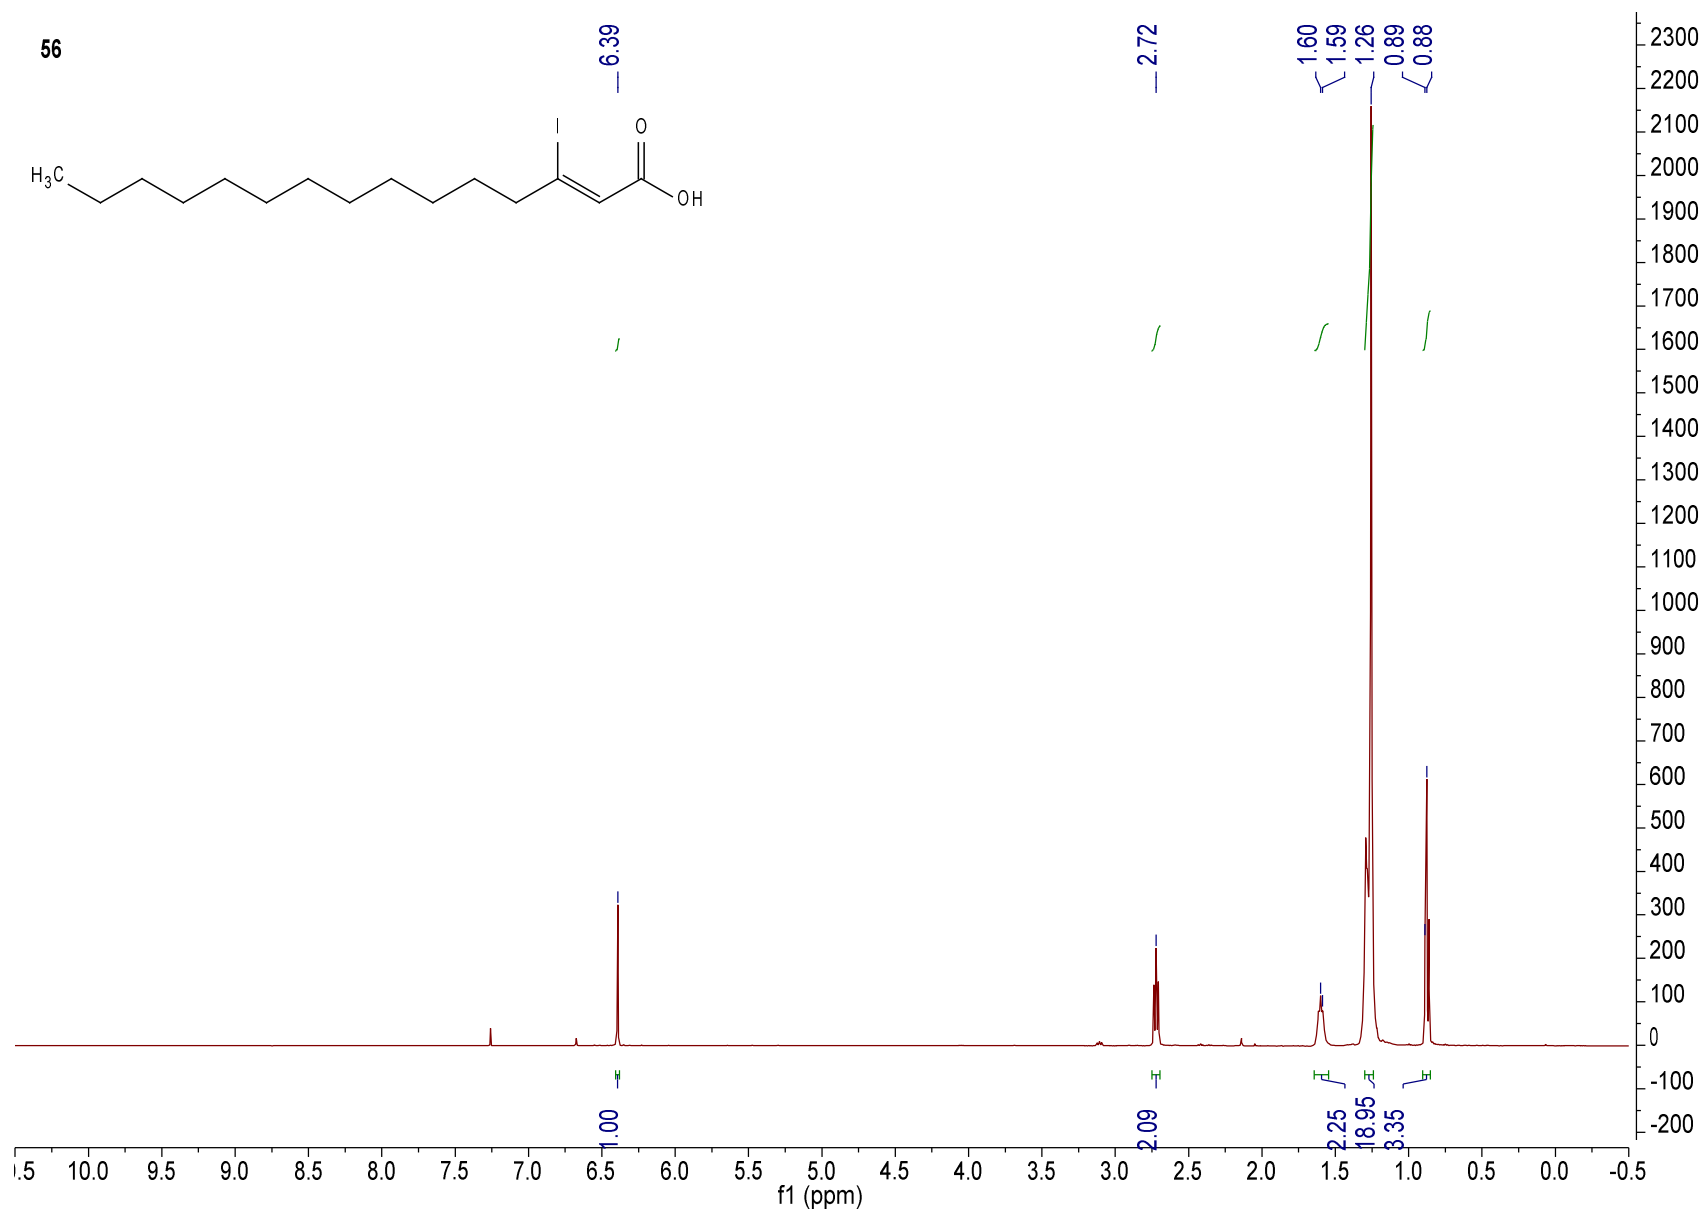

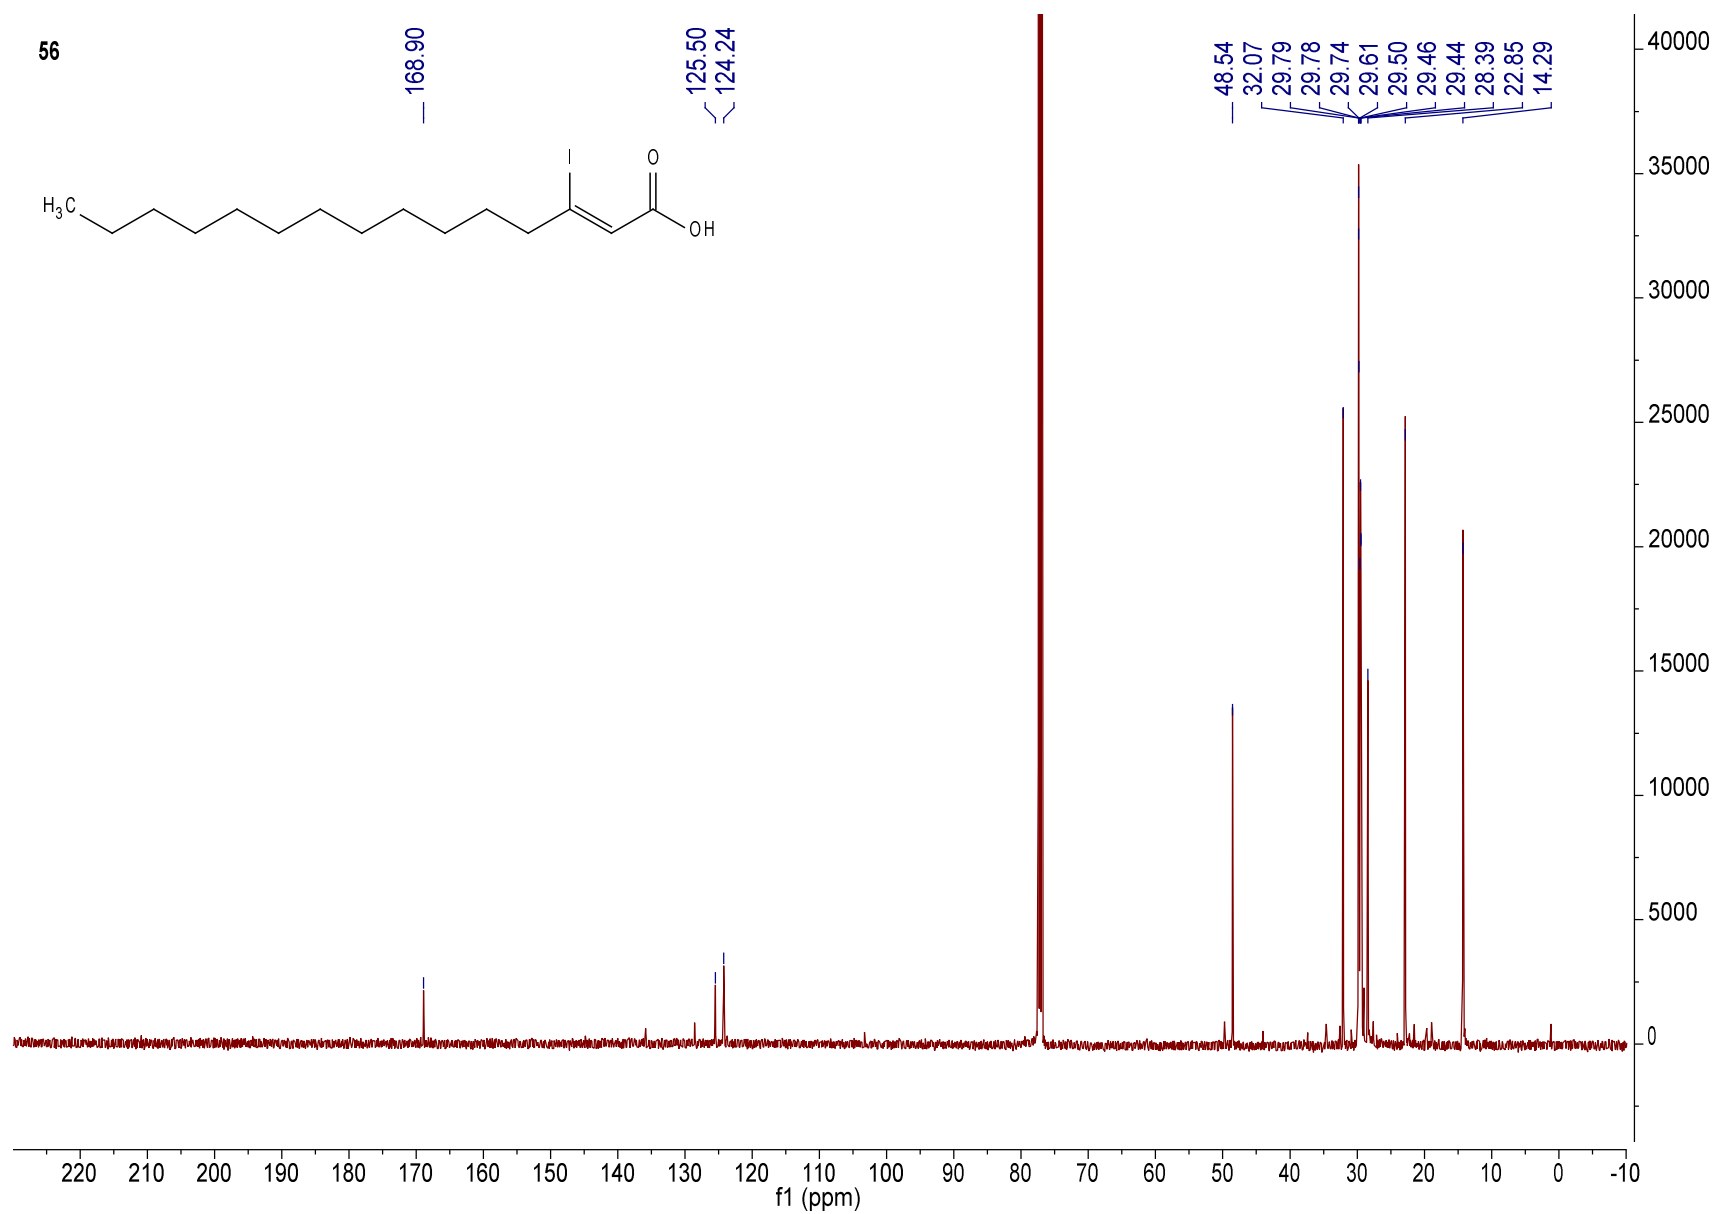

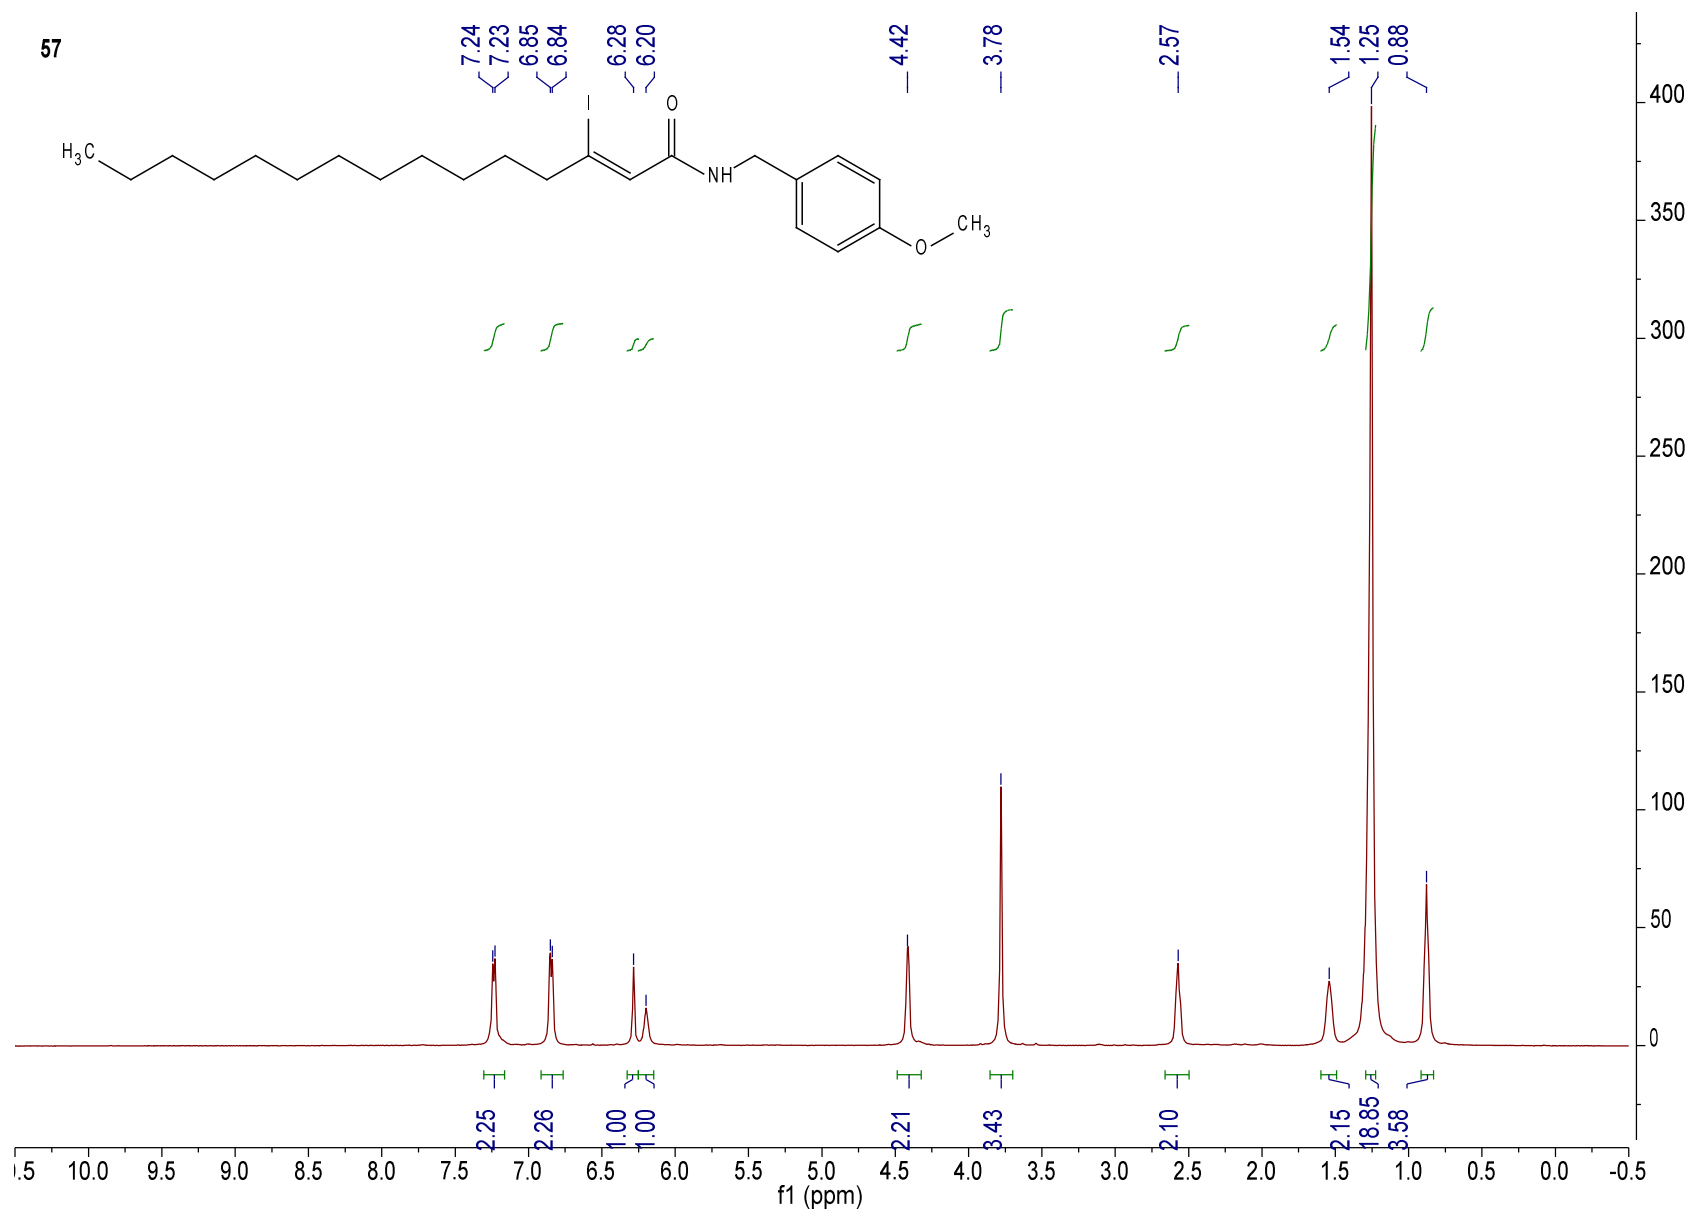

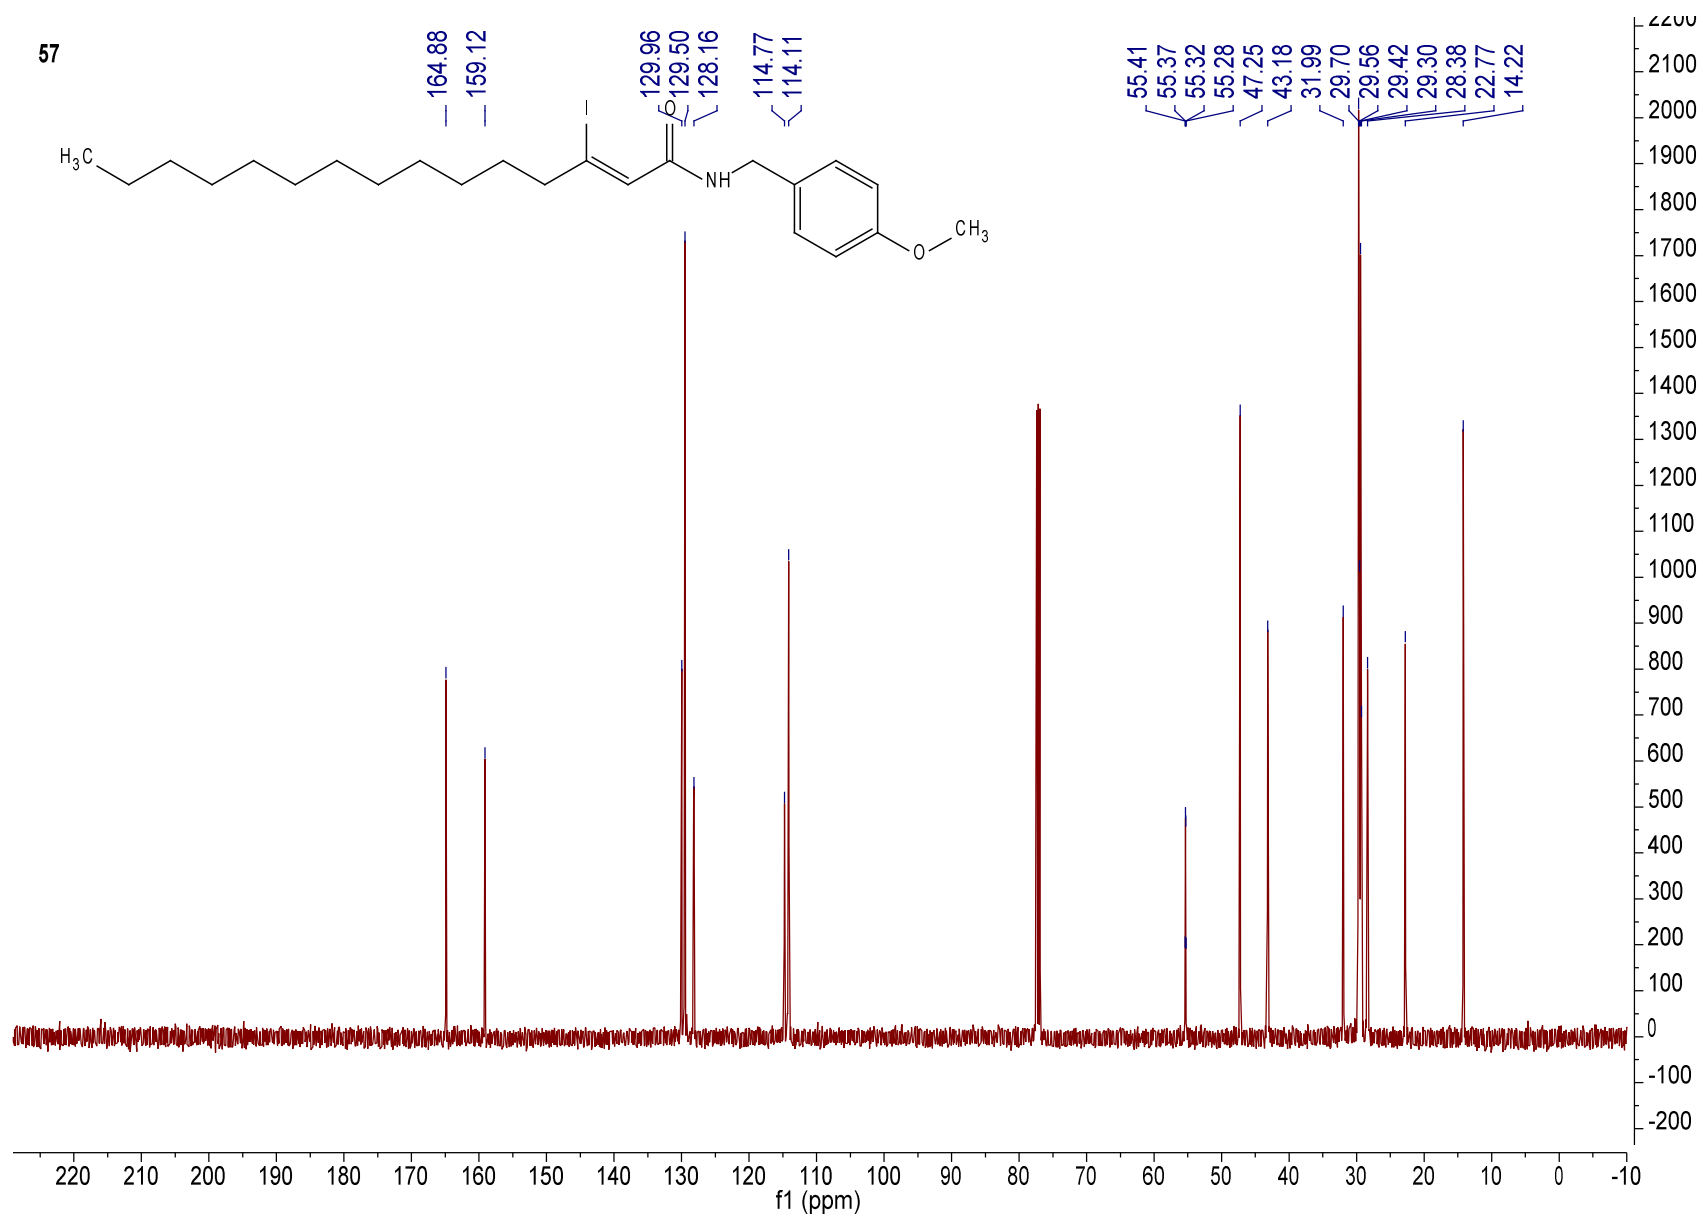

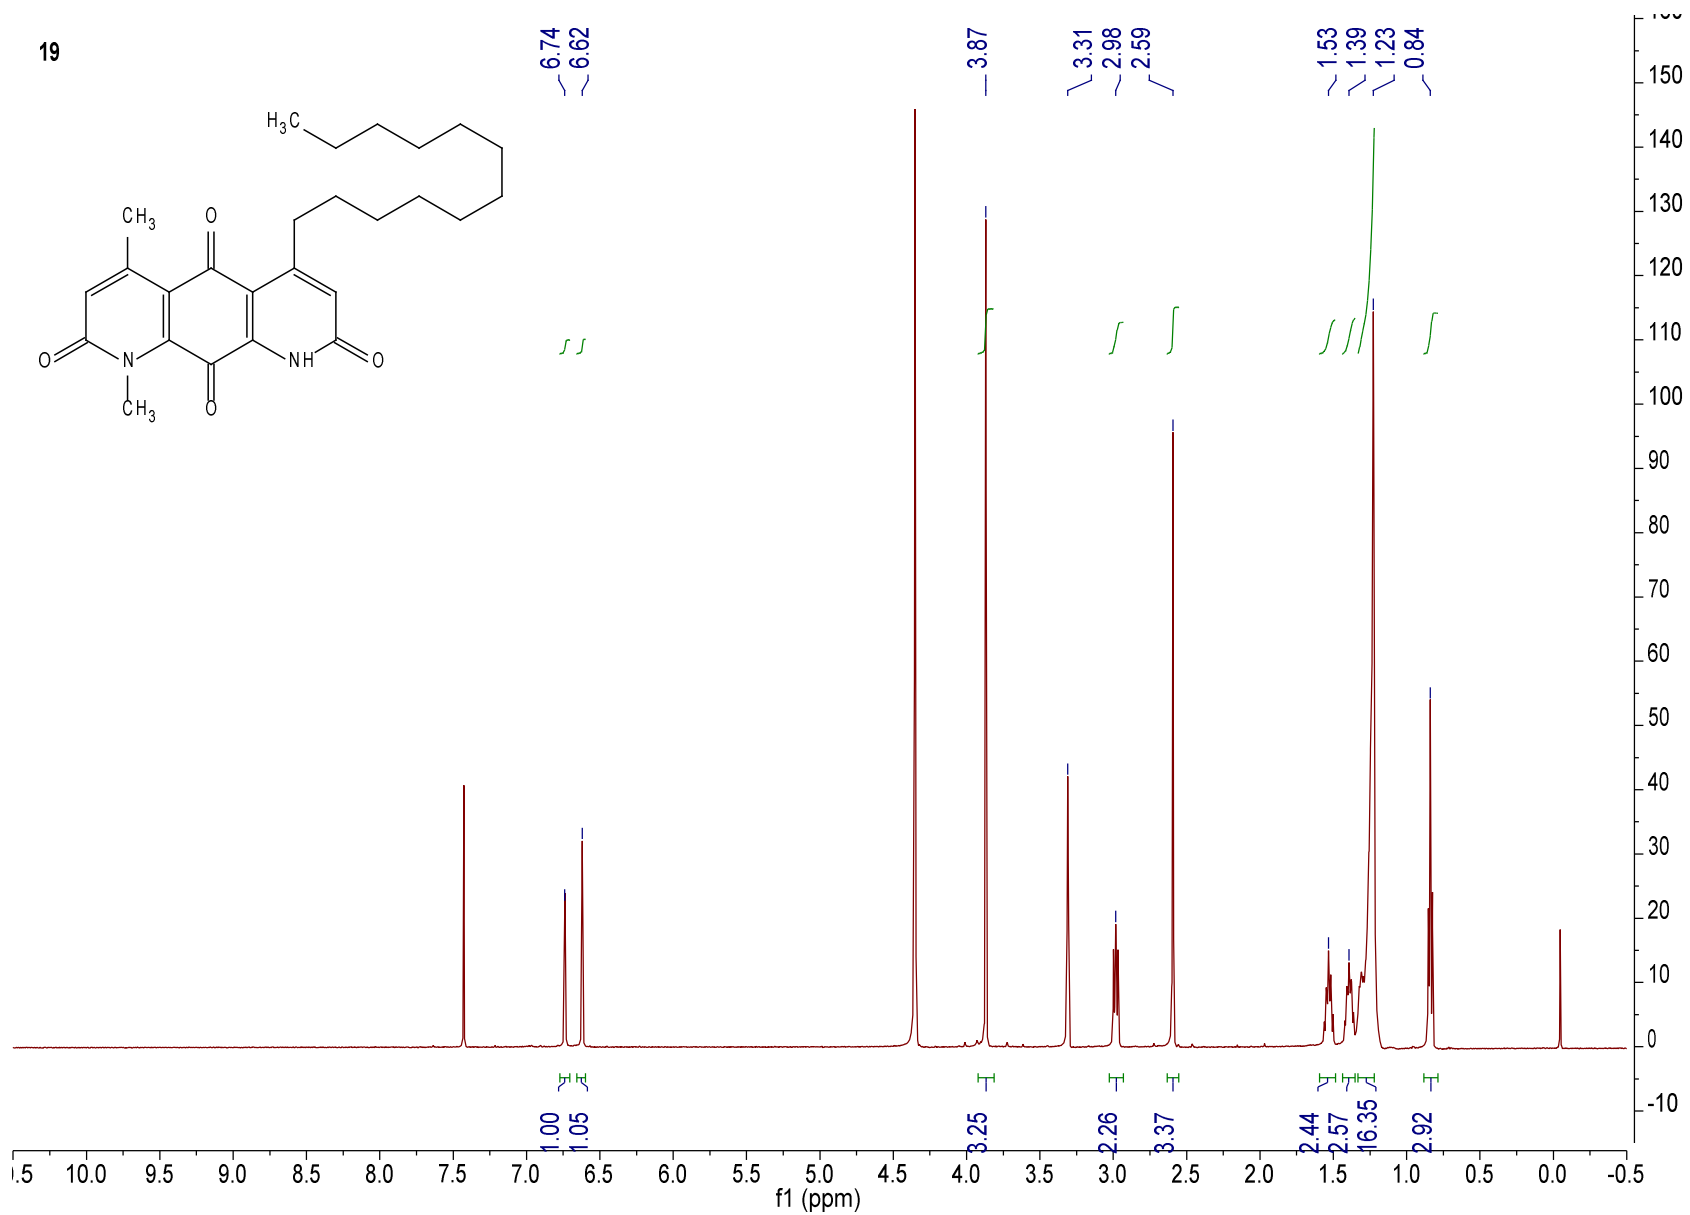

19

Chemical structure of 1,3-bis(4-oxo-4-(octylideneamino)-2-pyridyl)-2,5-pyridinedione is shown. The structure features a central pyridine ring substituted with two 4-oxo-4-(octylideneamino)-2-pyridyl groups. The octylidene chain is labeled with H<sub>3</sub>C.

Chemical shifts (ppm) are listed at the top of the spectrum:

- 180.93
- 174.90
- 165.35
- 165.26
- 164.27
- 157.58
- 140.05
- 138.98
- 126.85
- 125.84
- 124.80
- 119.25
- 36.64
- 35.44
- 32.66
- 30.55
- 30.32
- 30.25
- 30.13
- 30.09
- 30.05
- 29.84
- 23.21
- 23.09
- 13.50

58

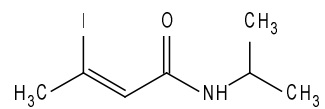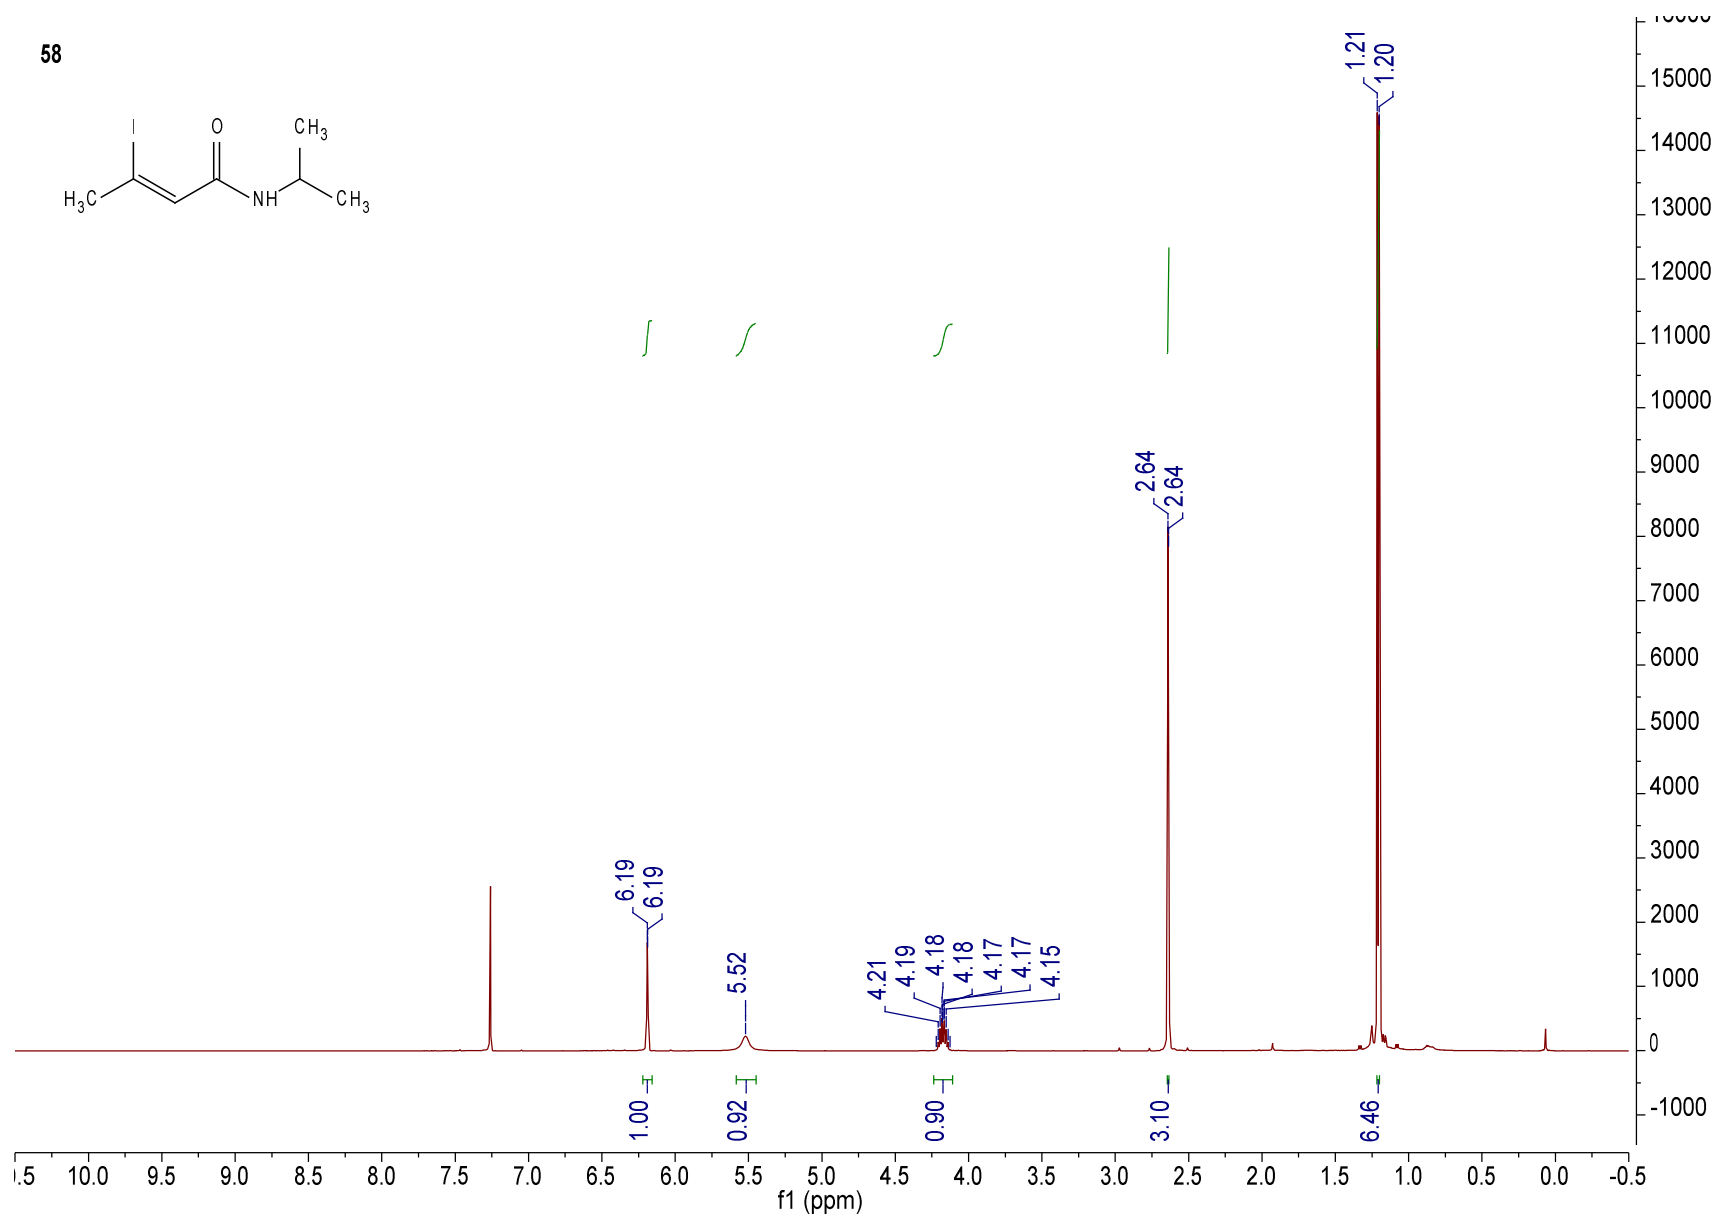



58

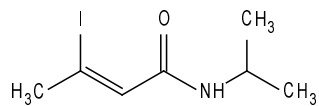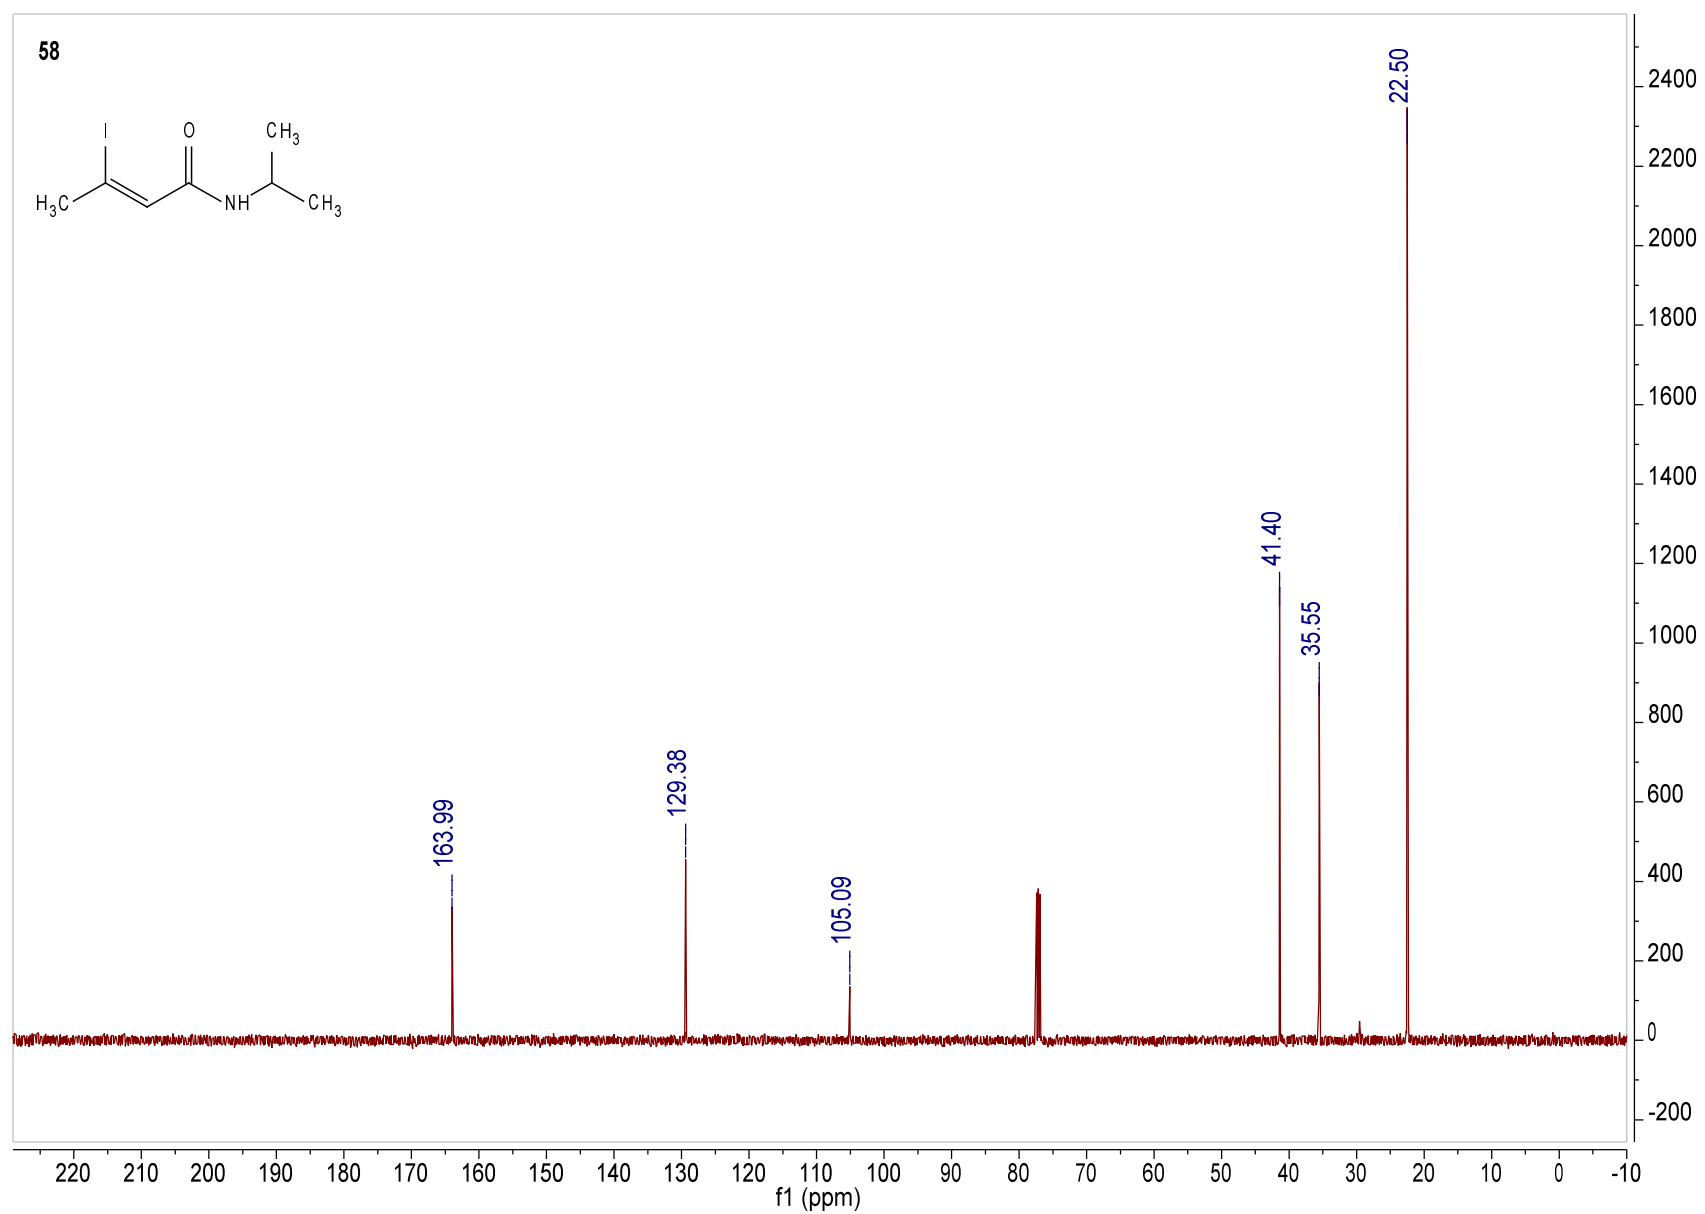

20

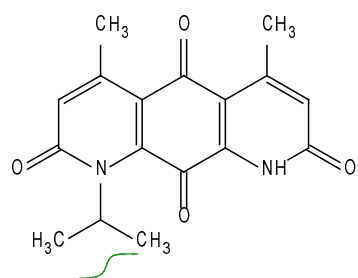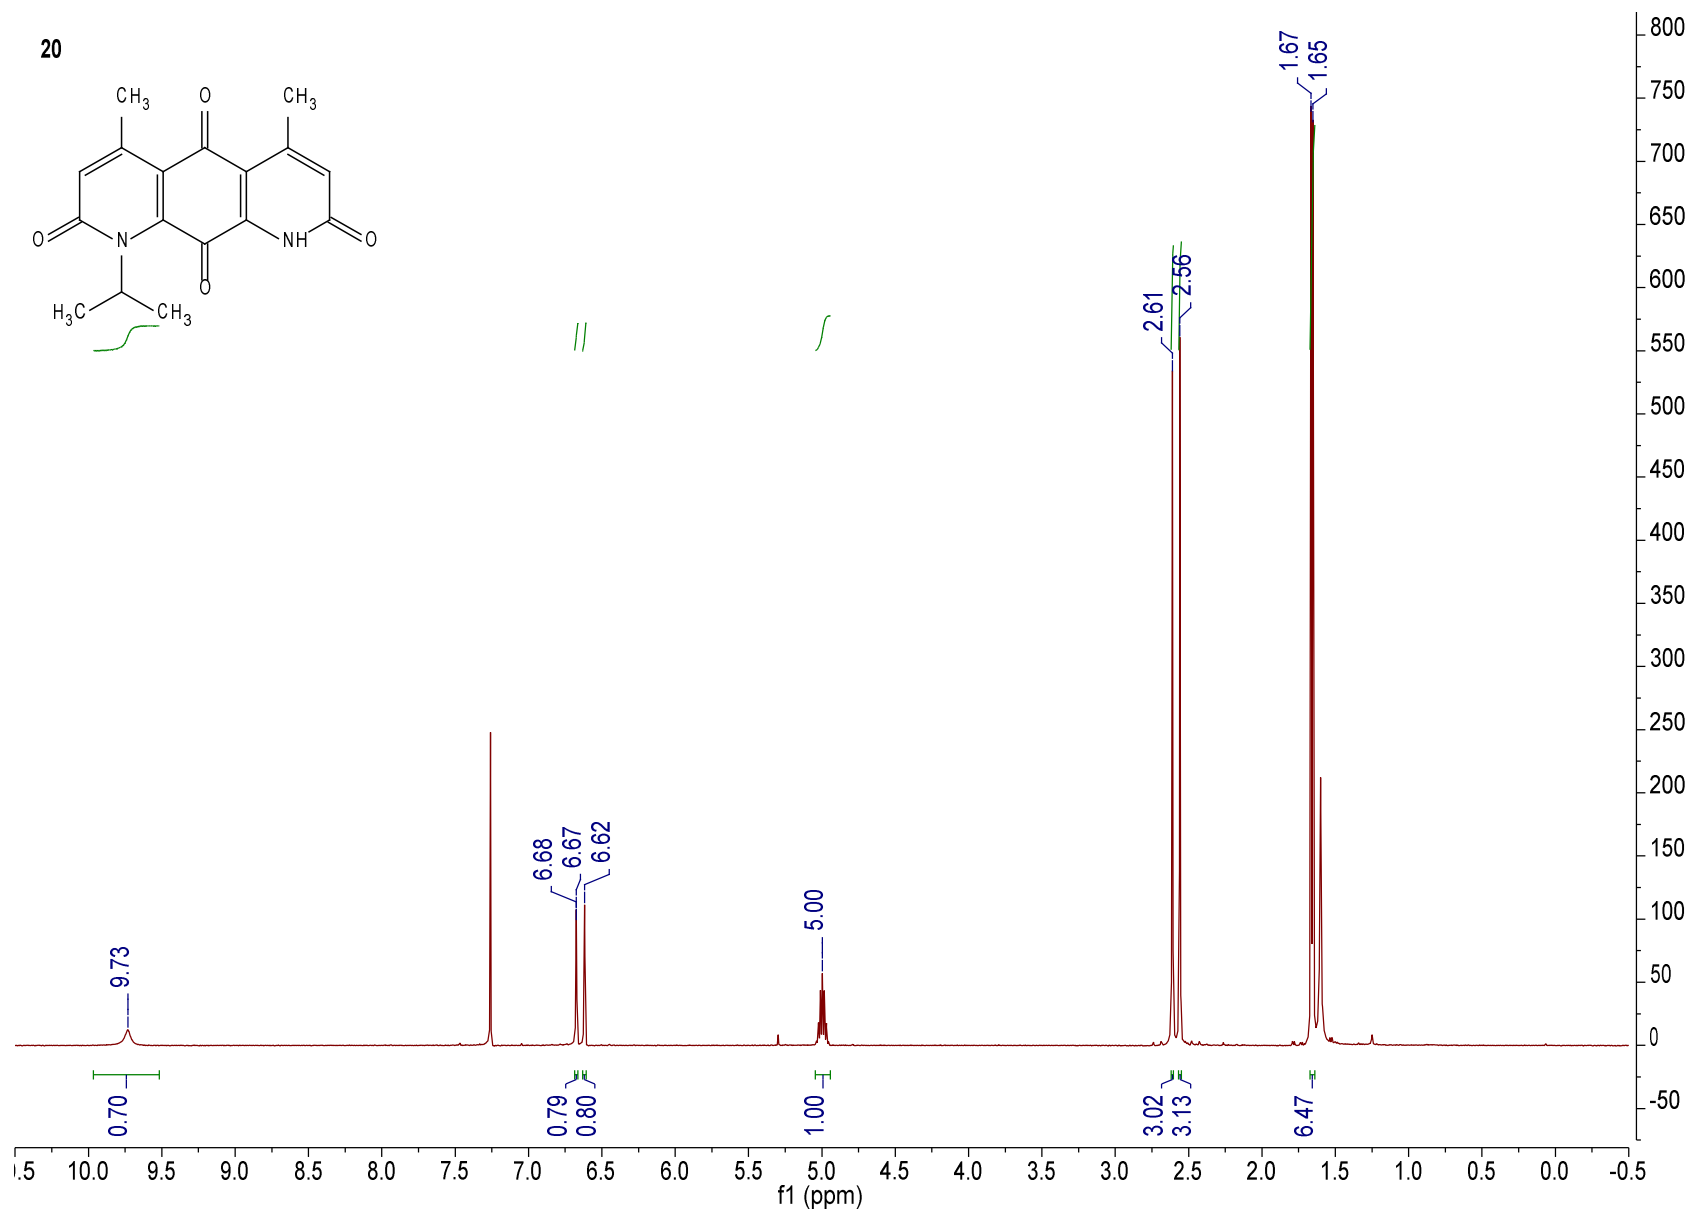

20

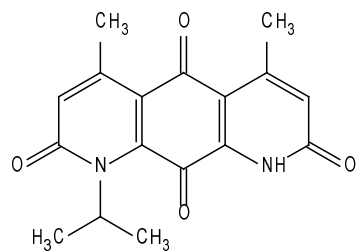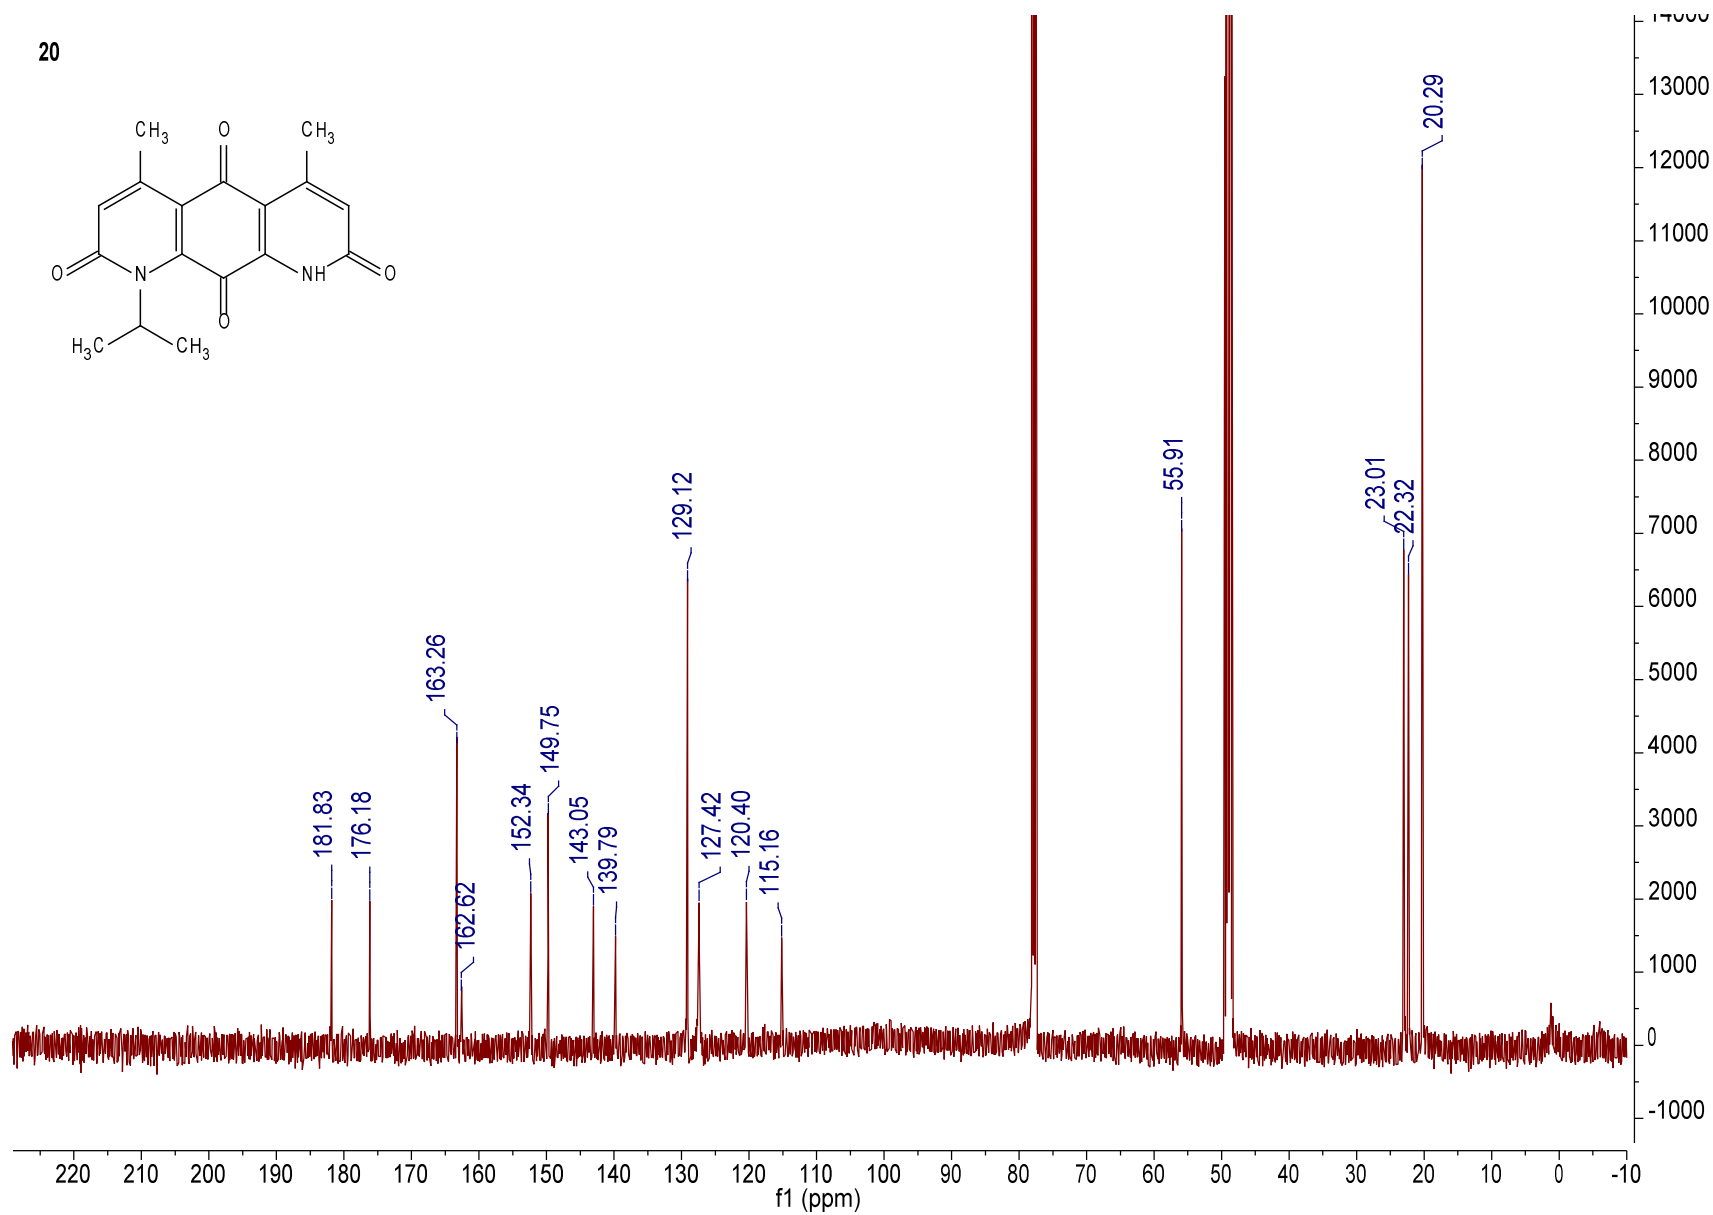

59

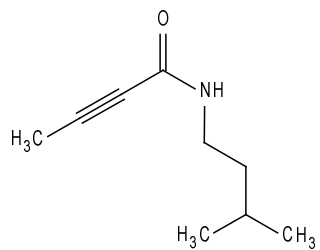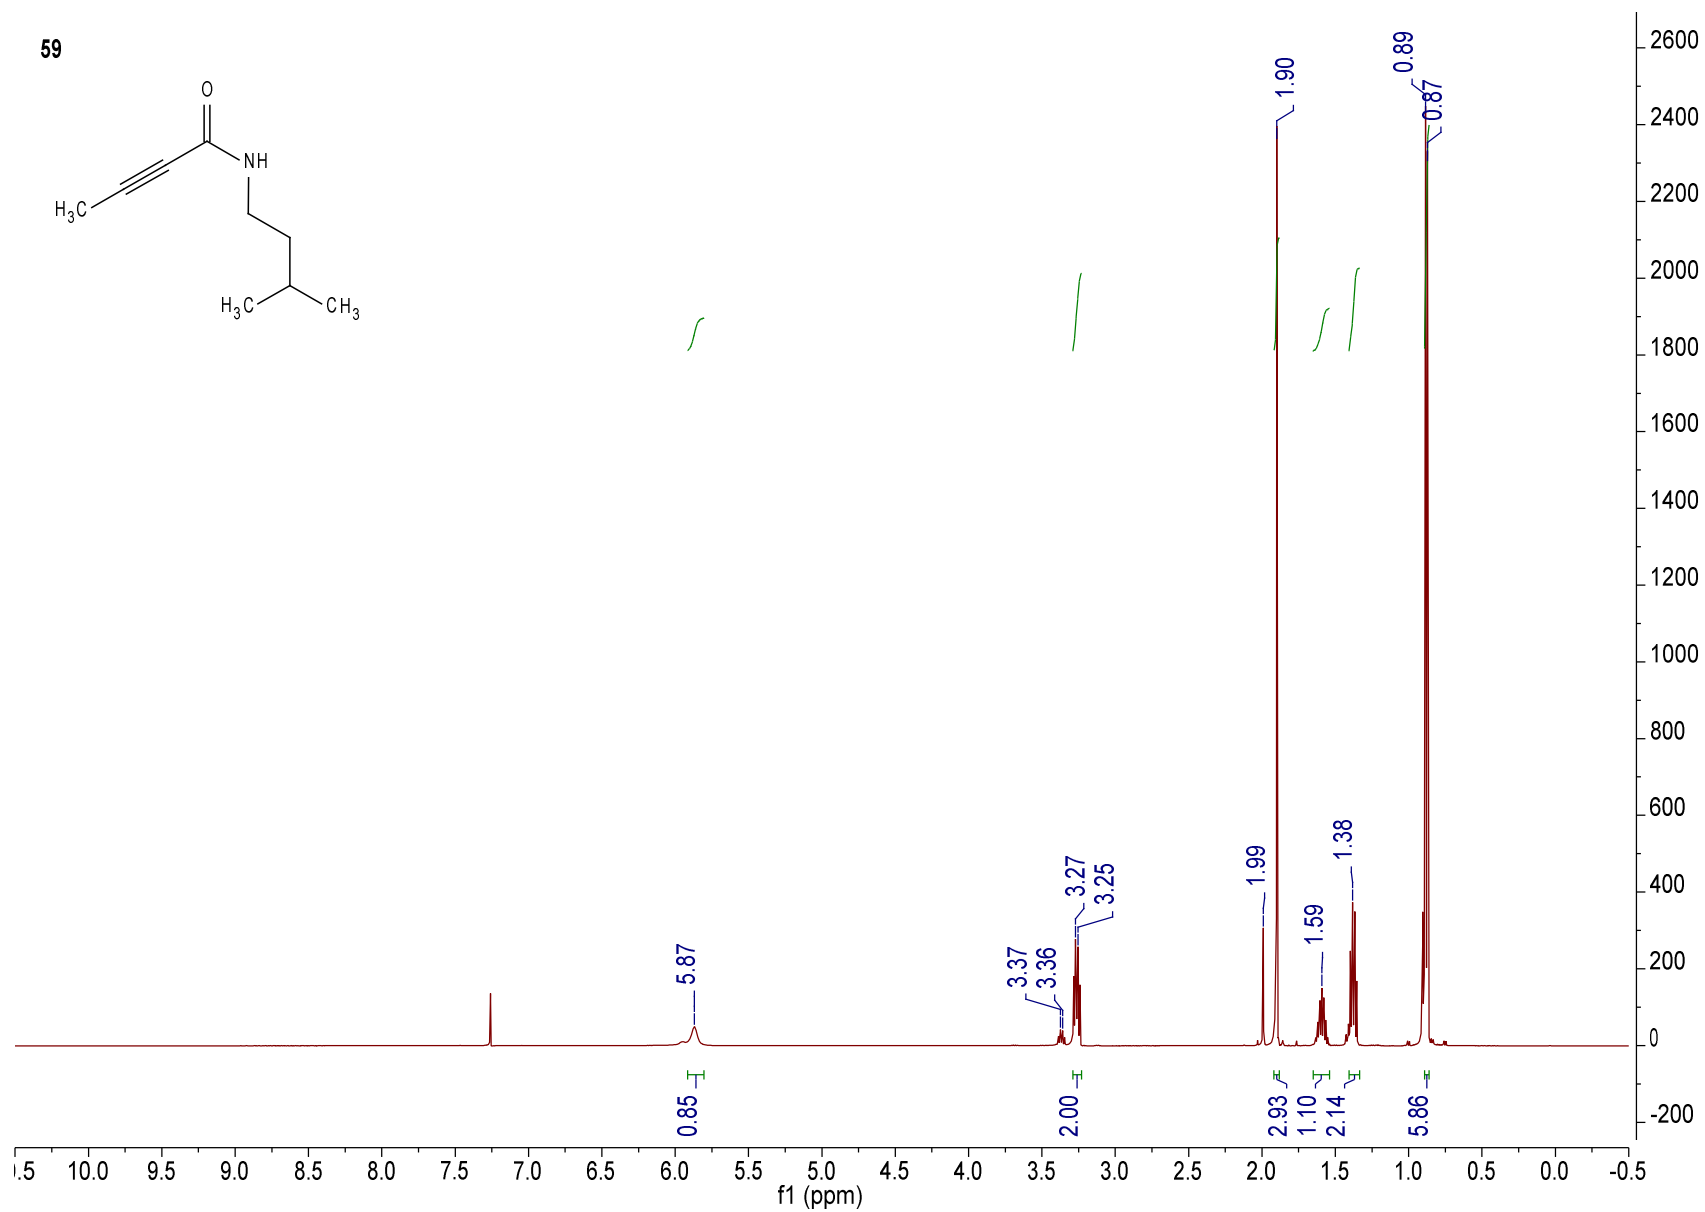

59

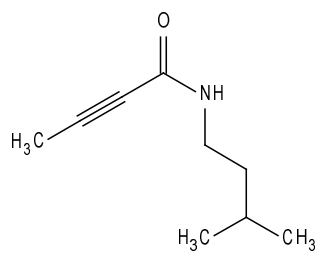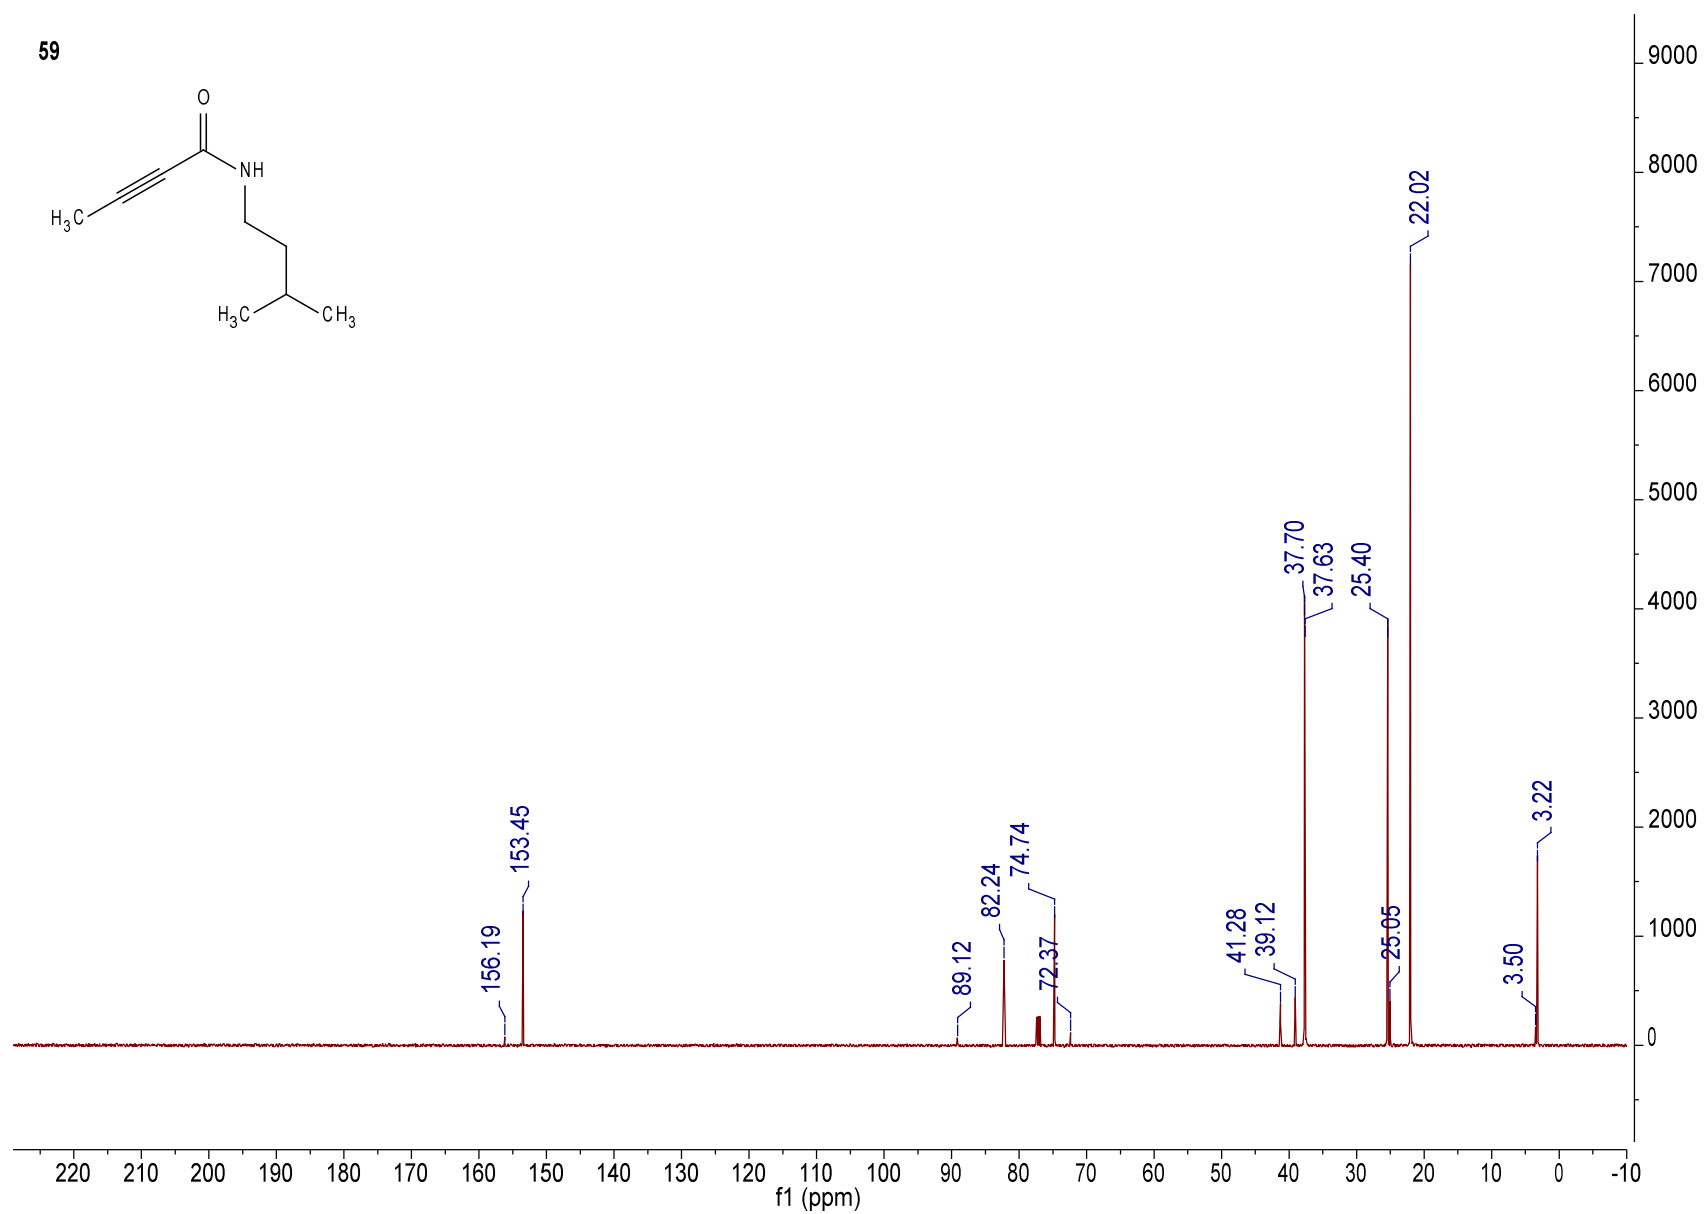

60

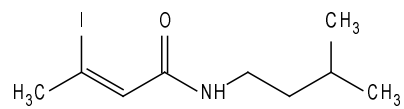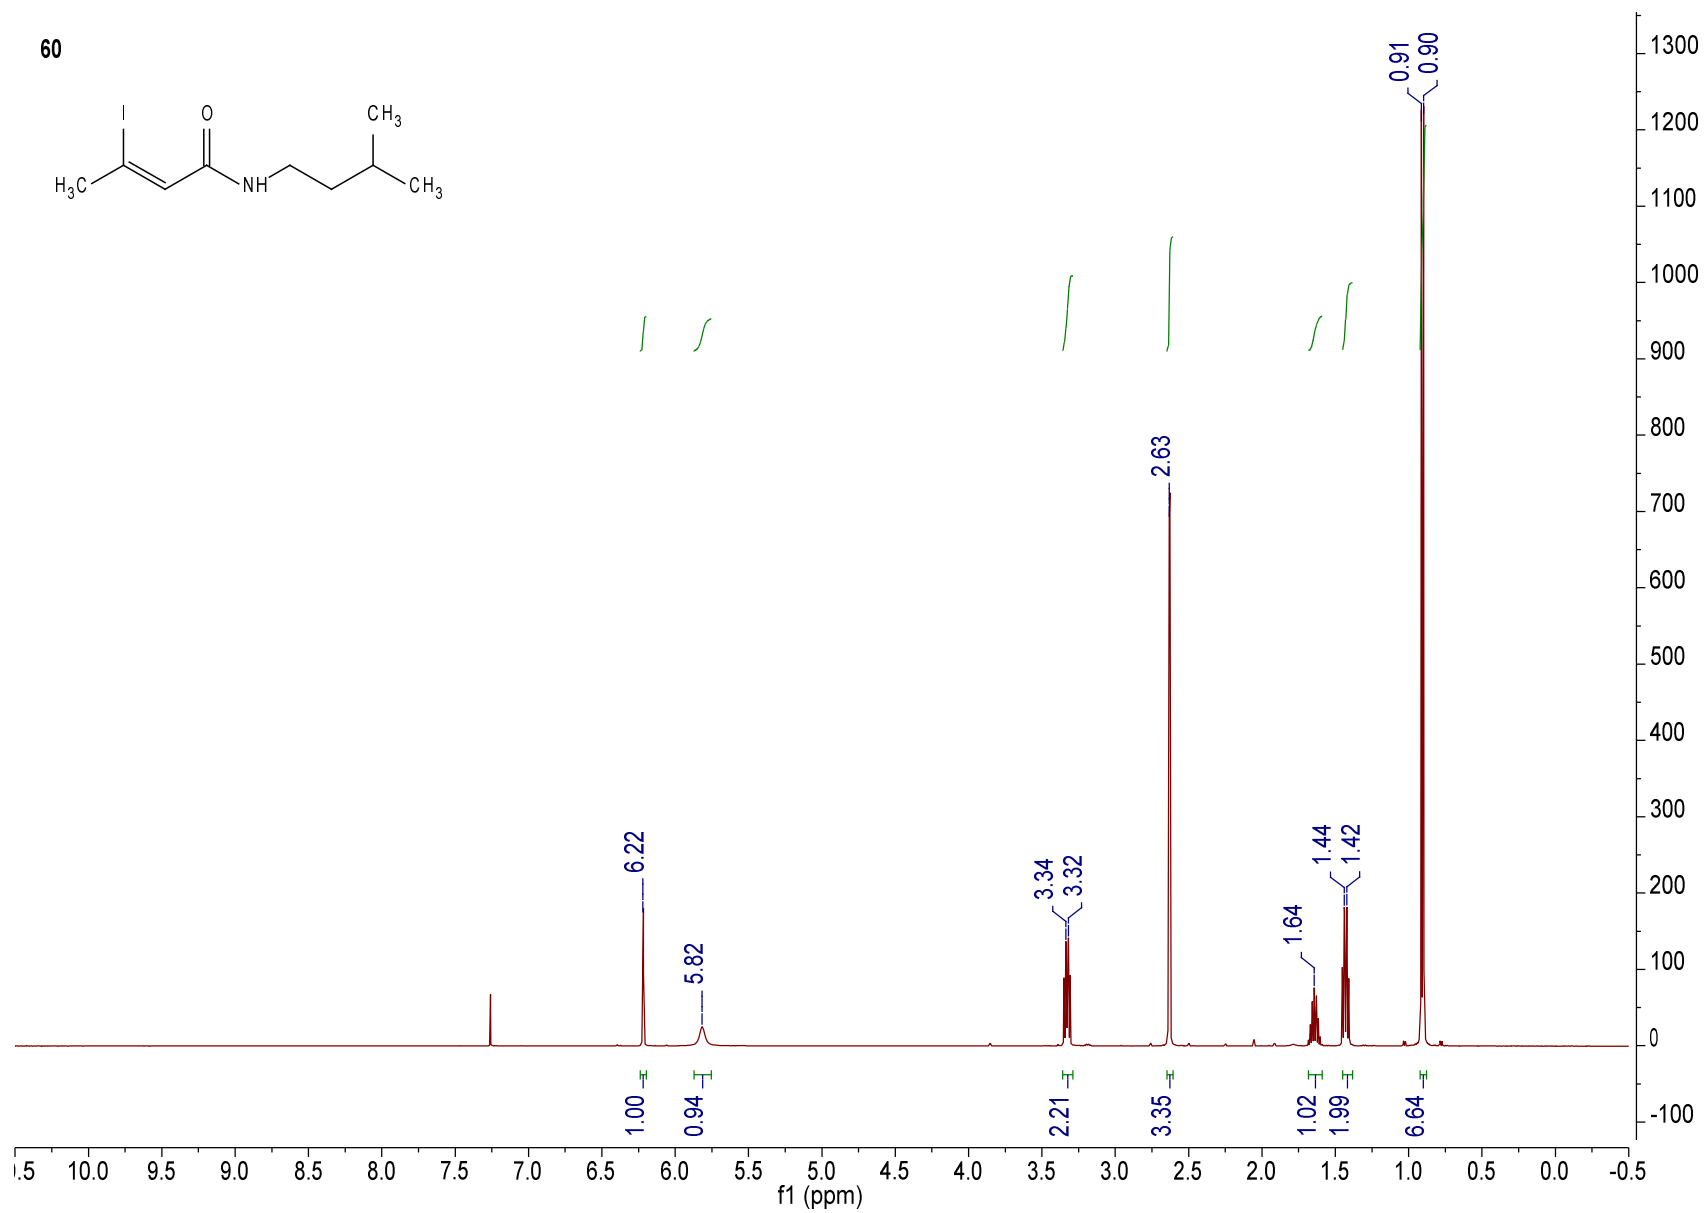

60

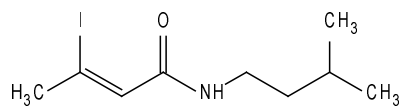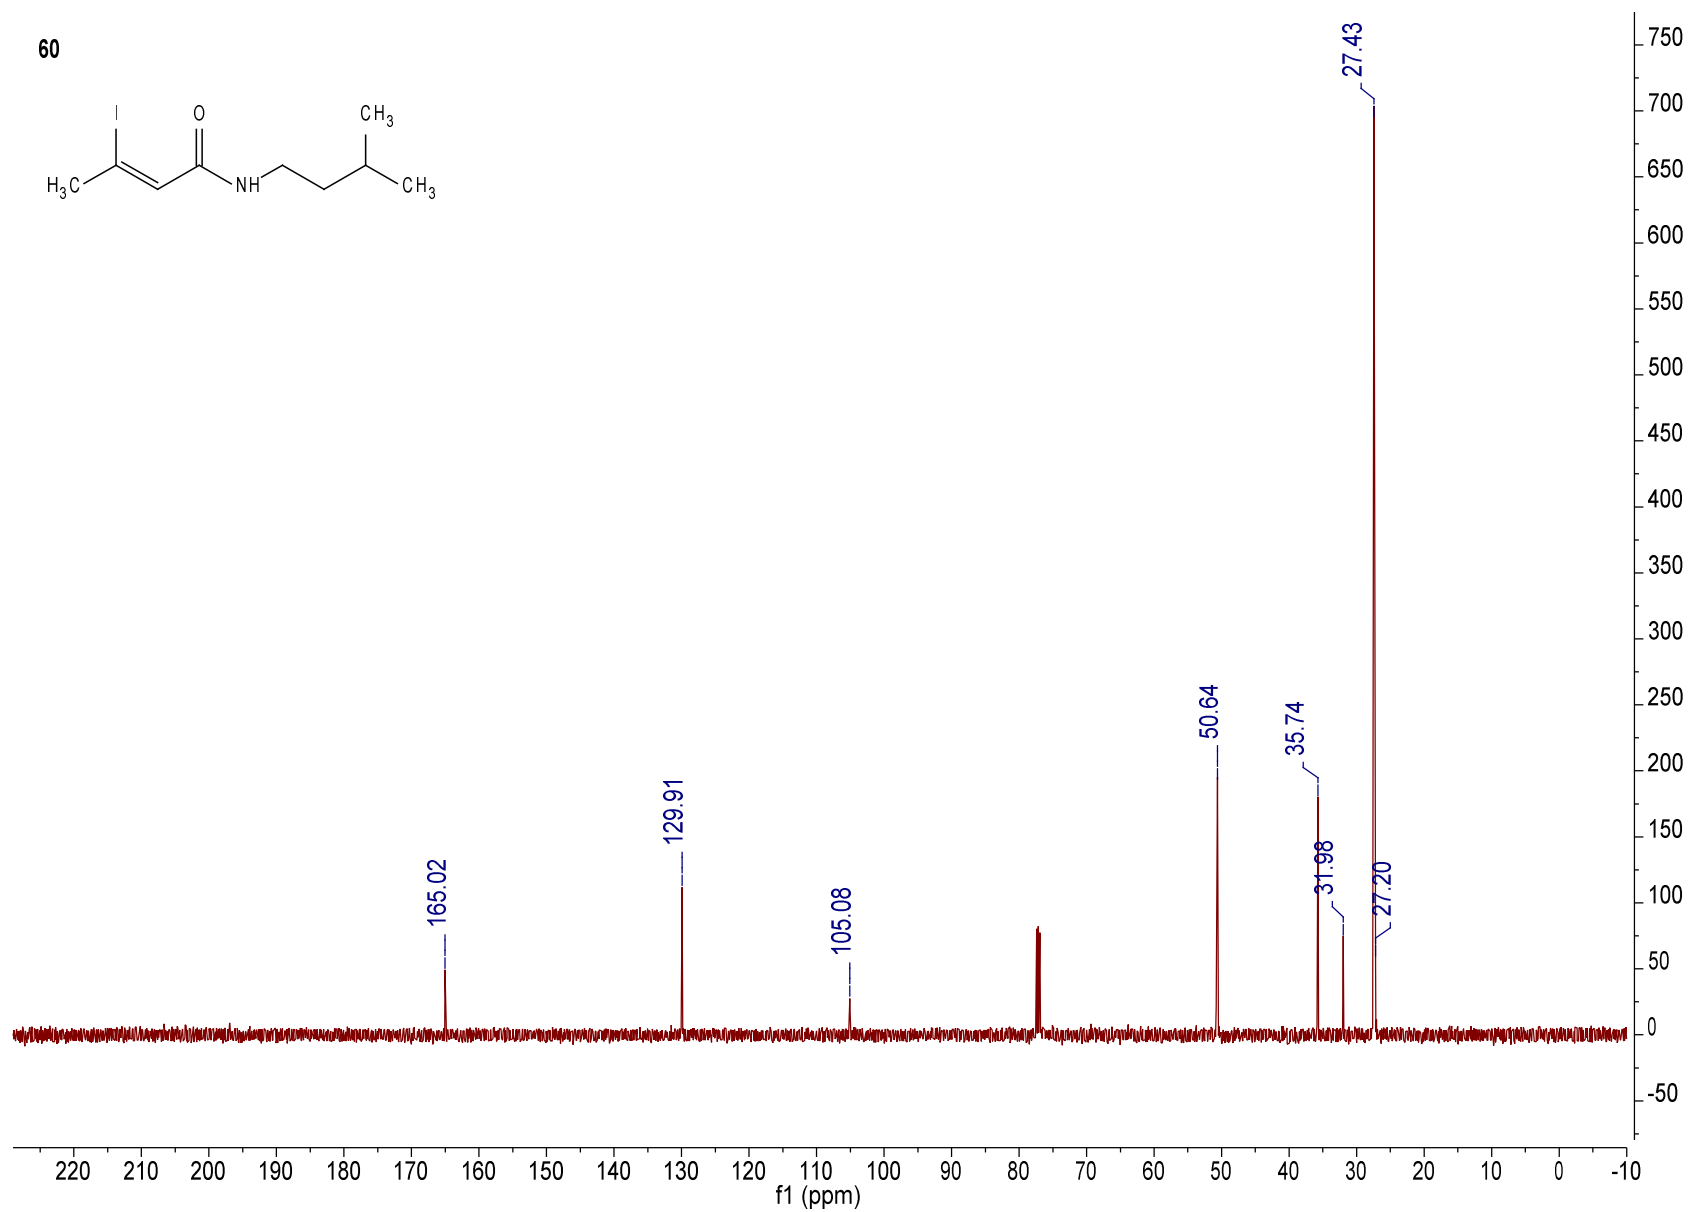

21

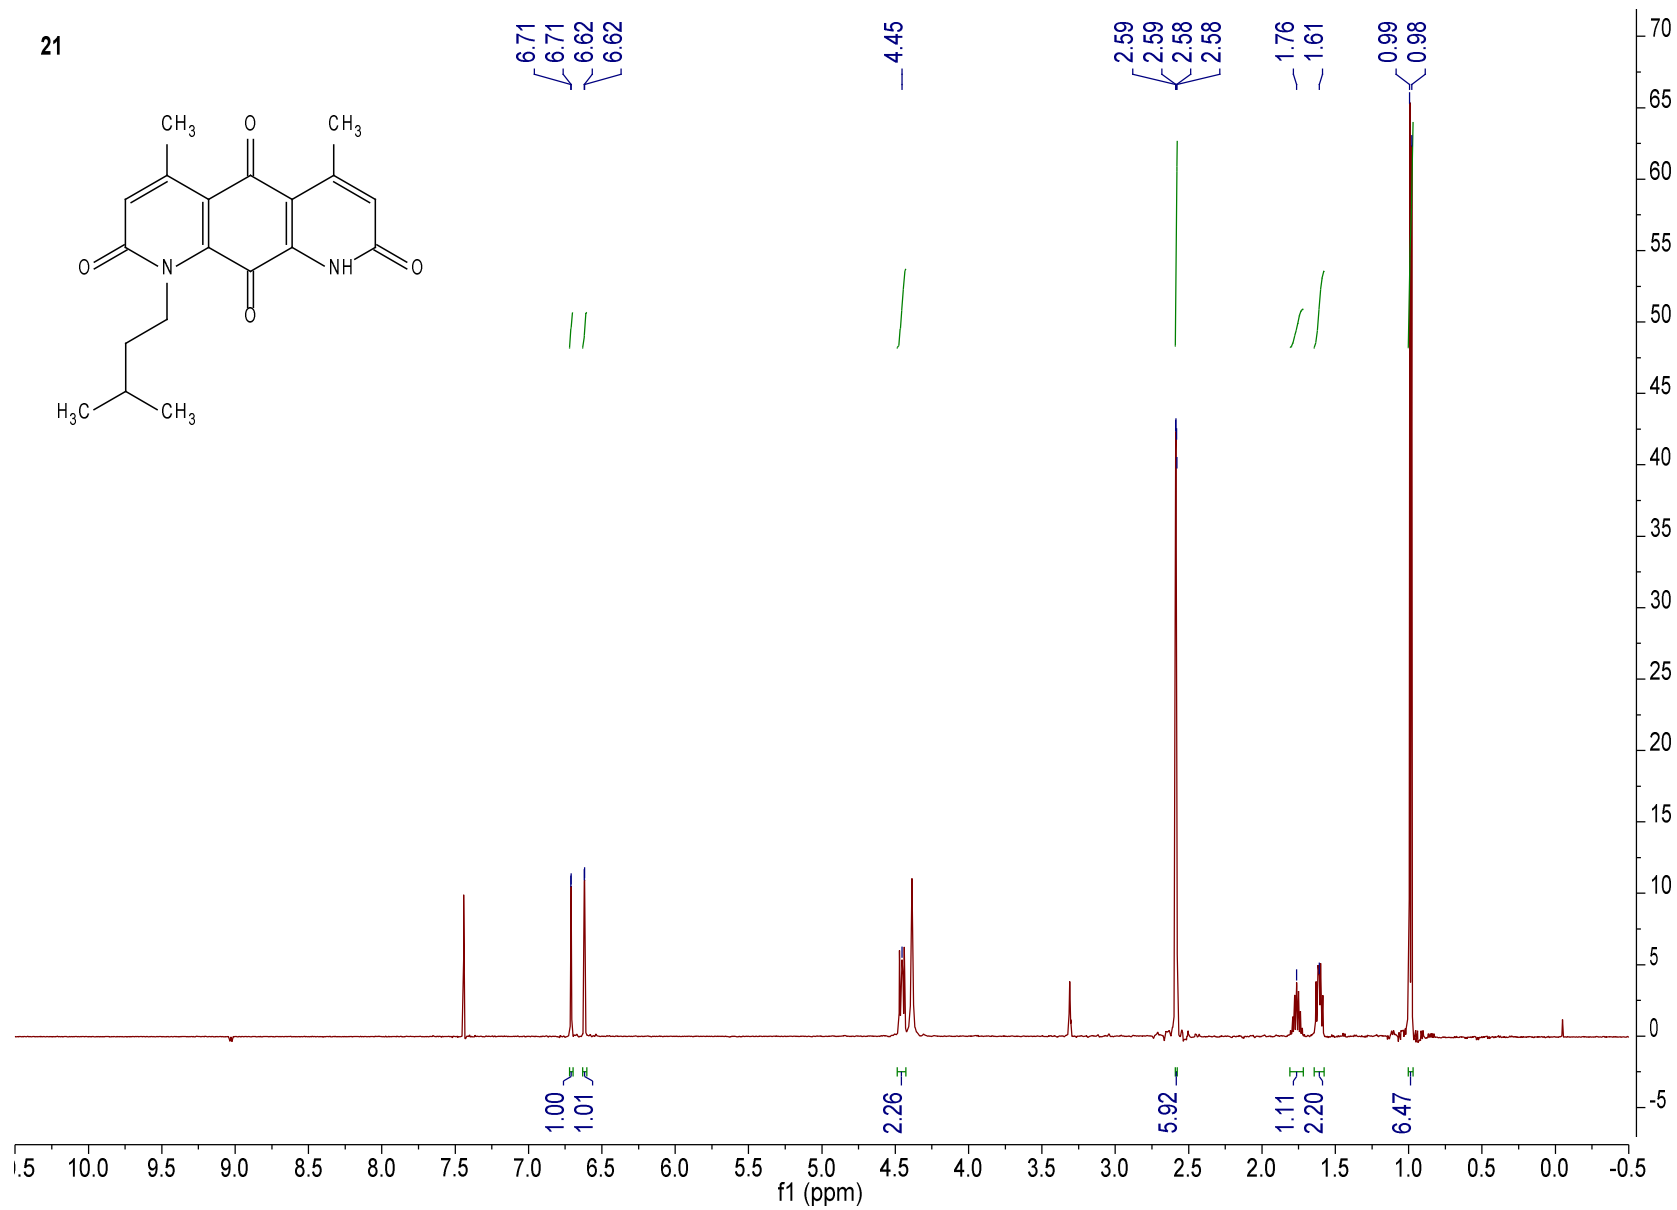



21

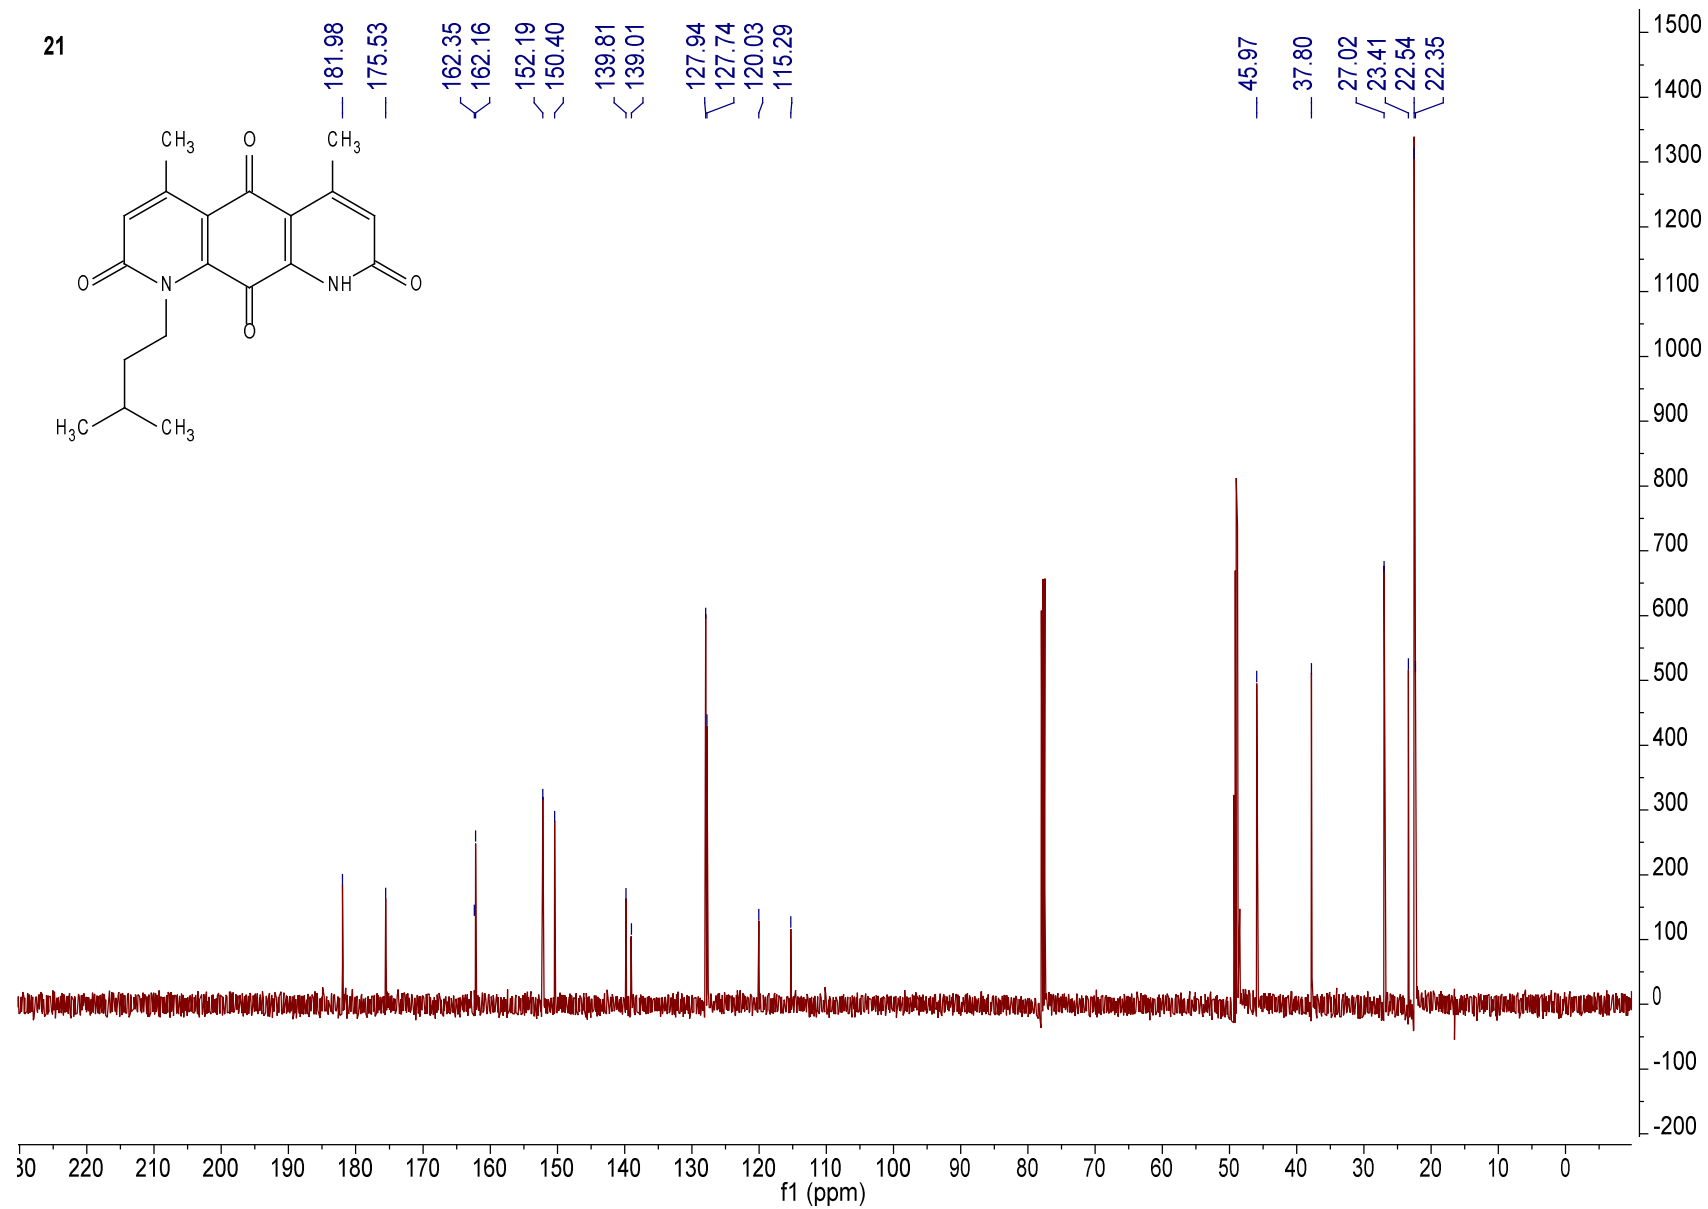

61

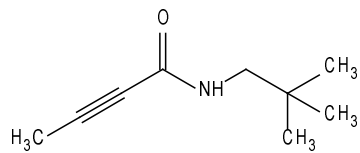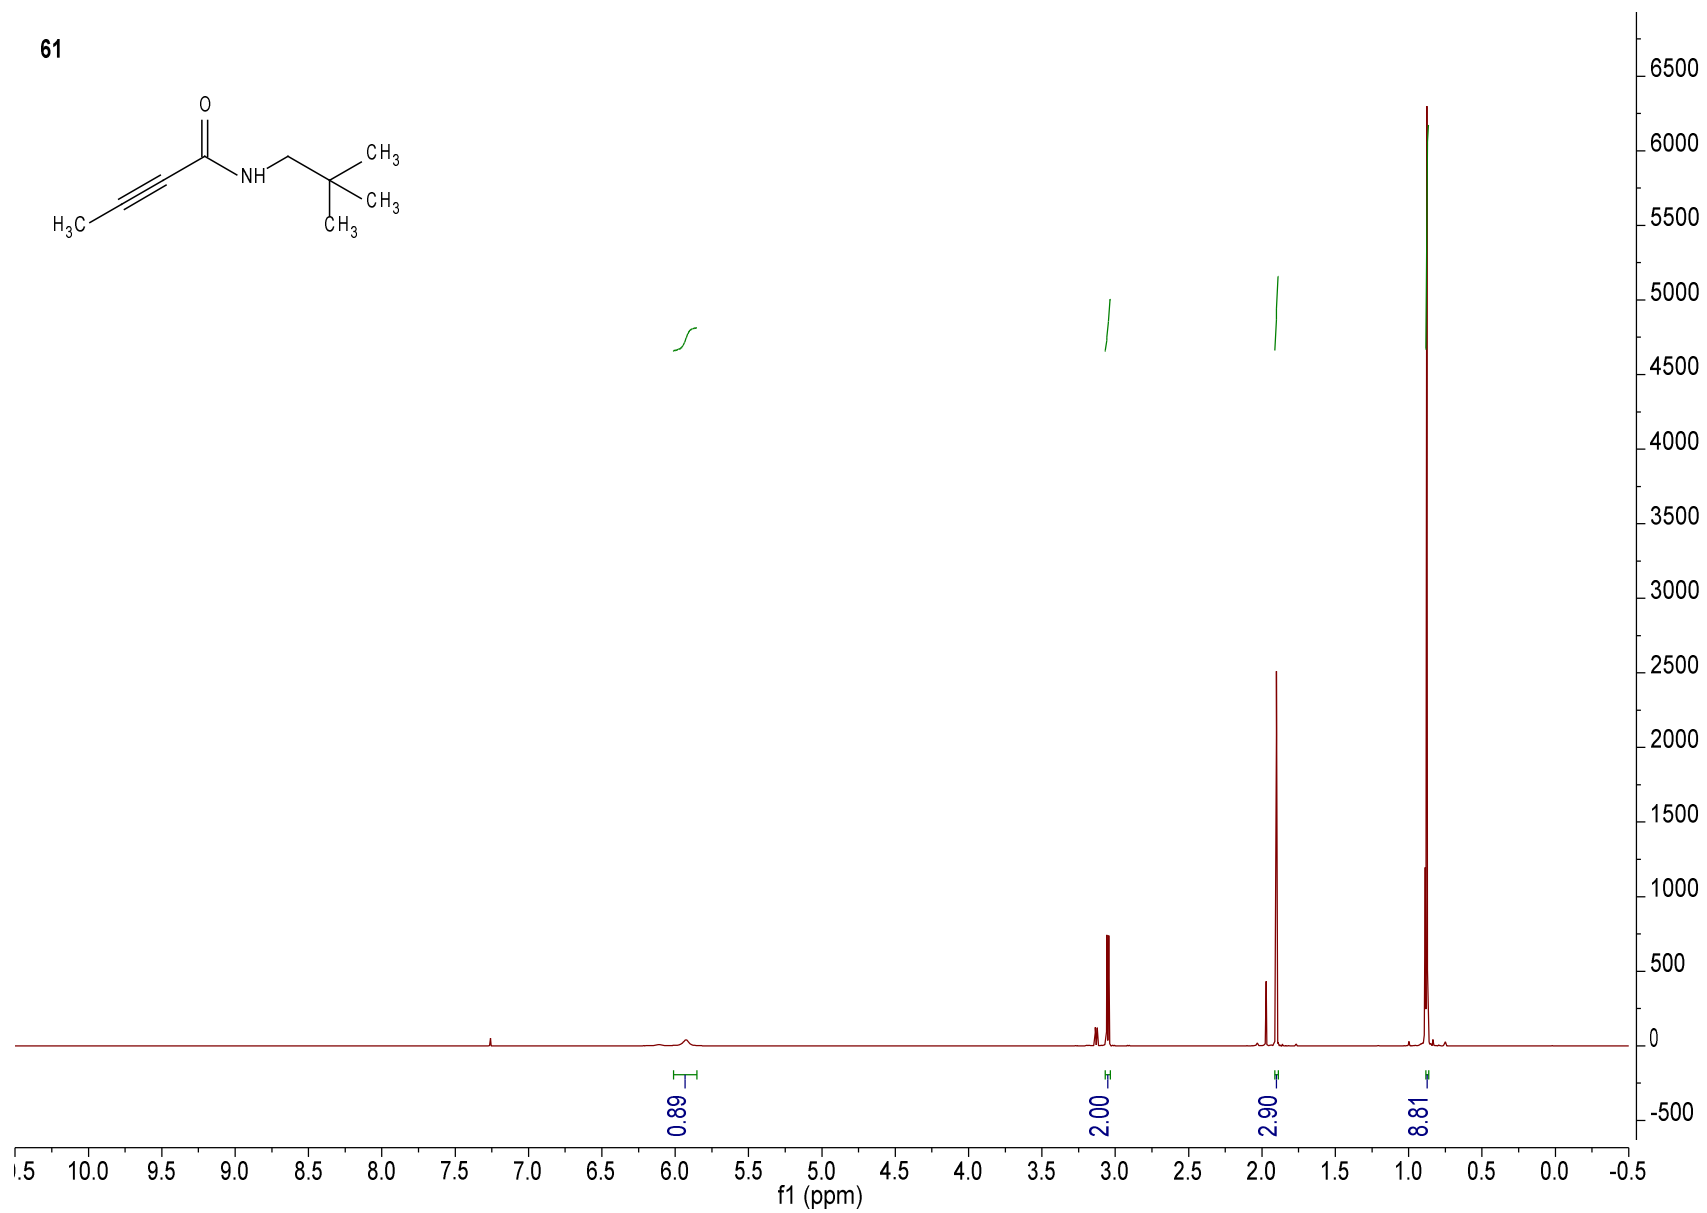

61

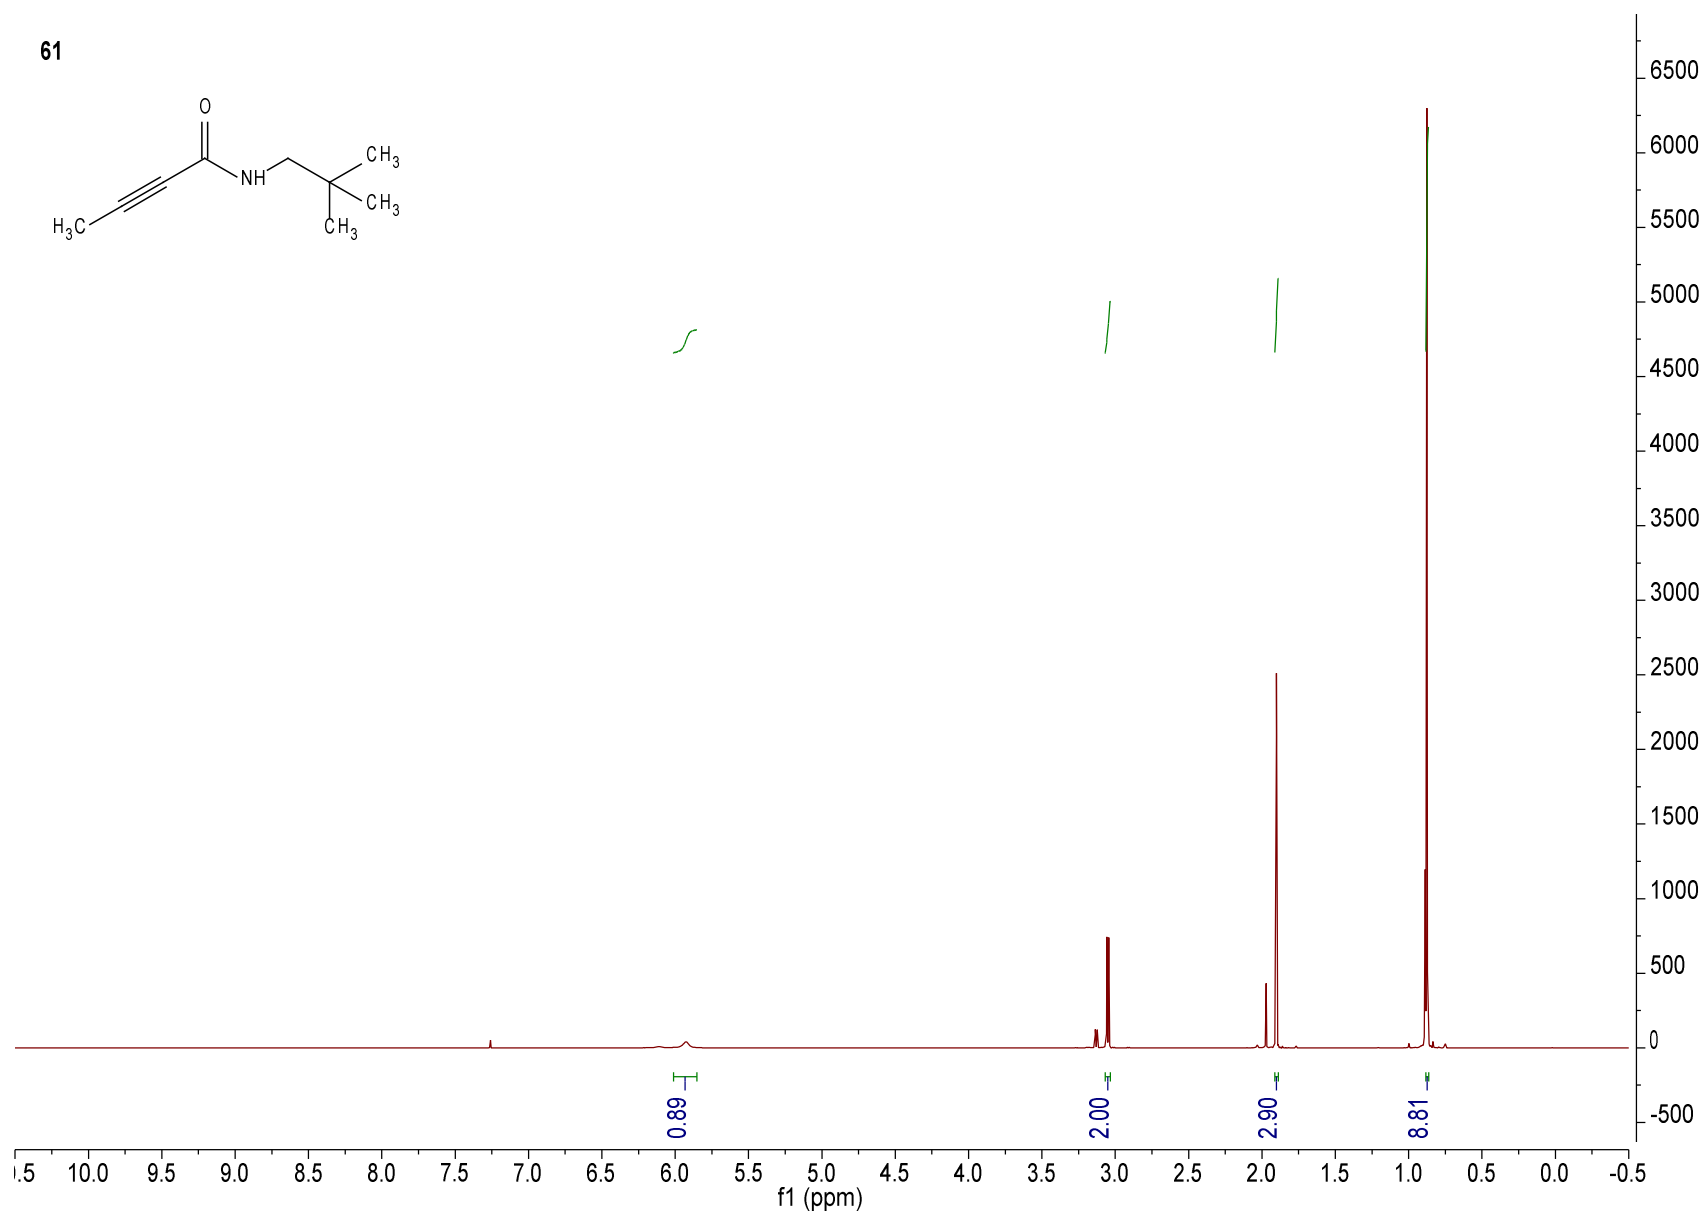

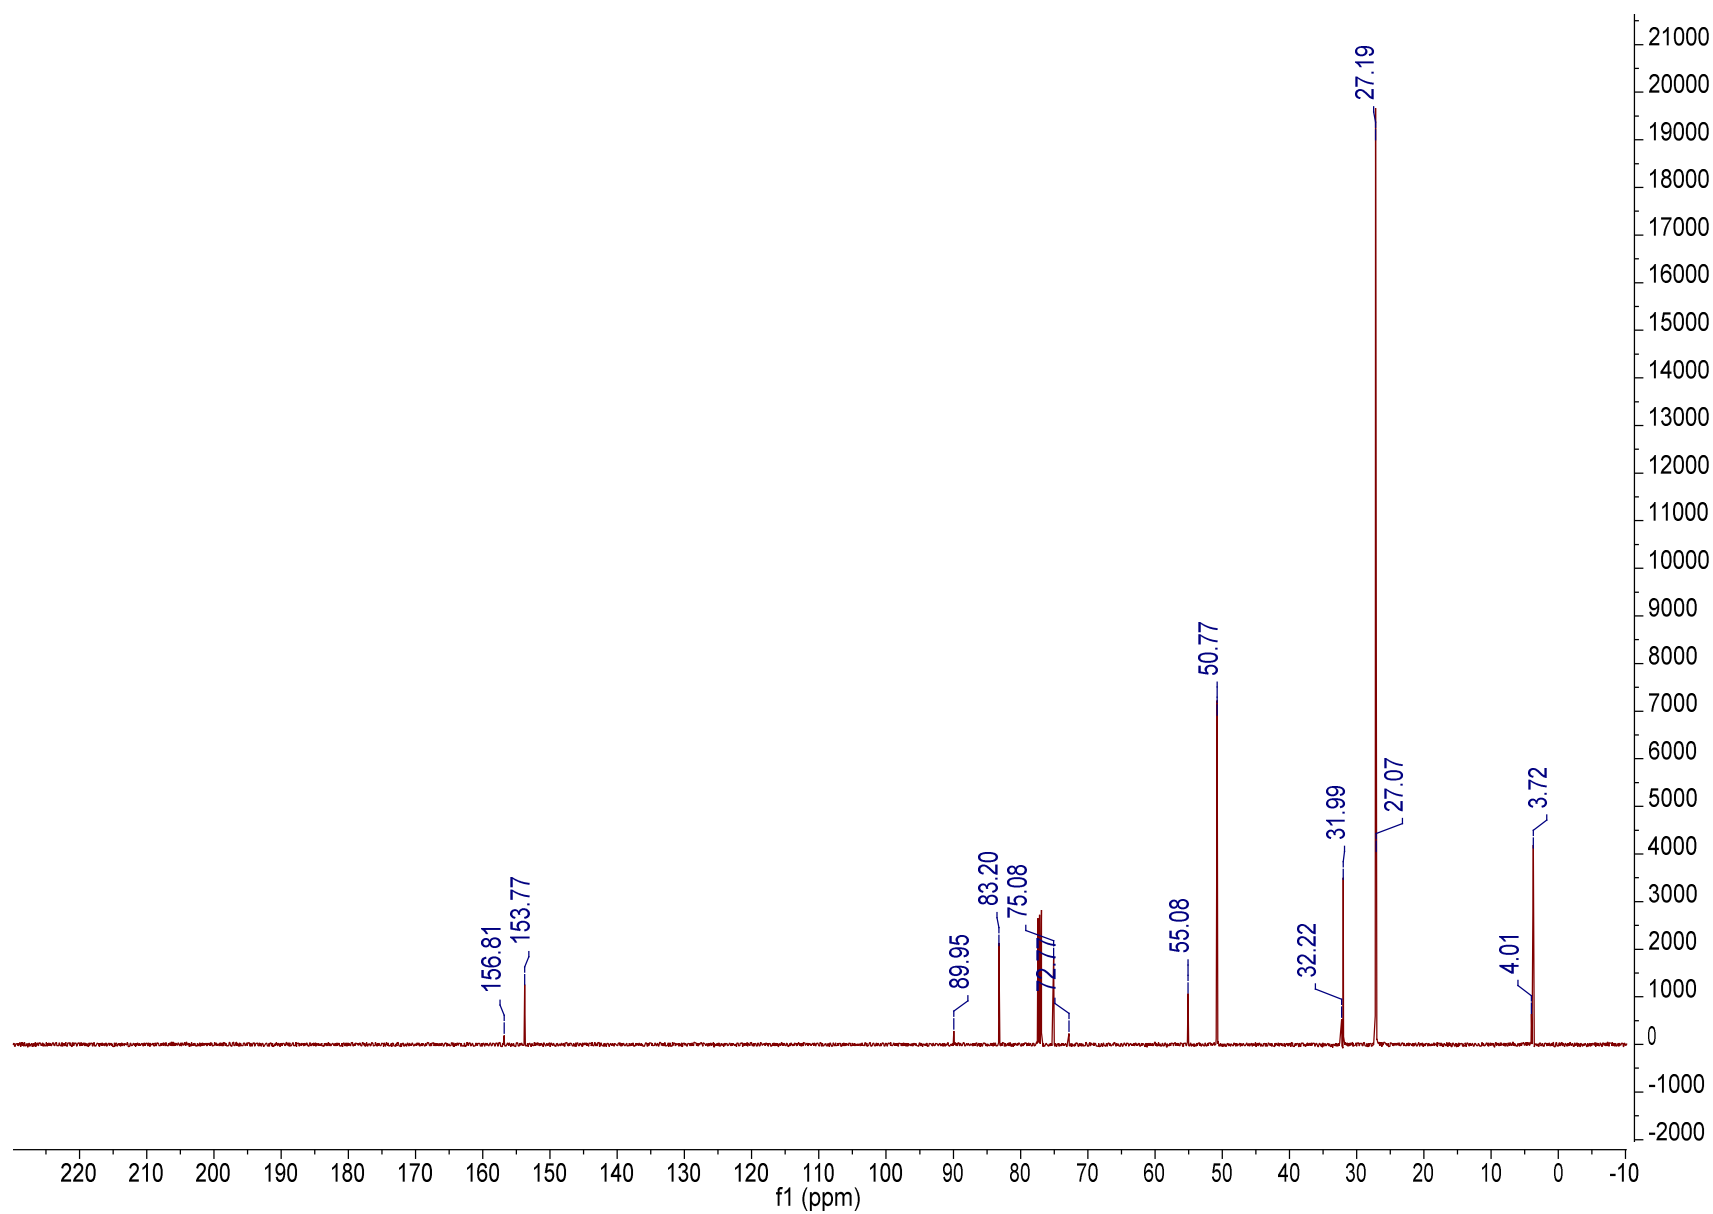

61

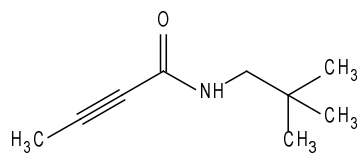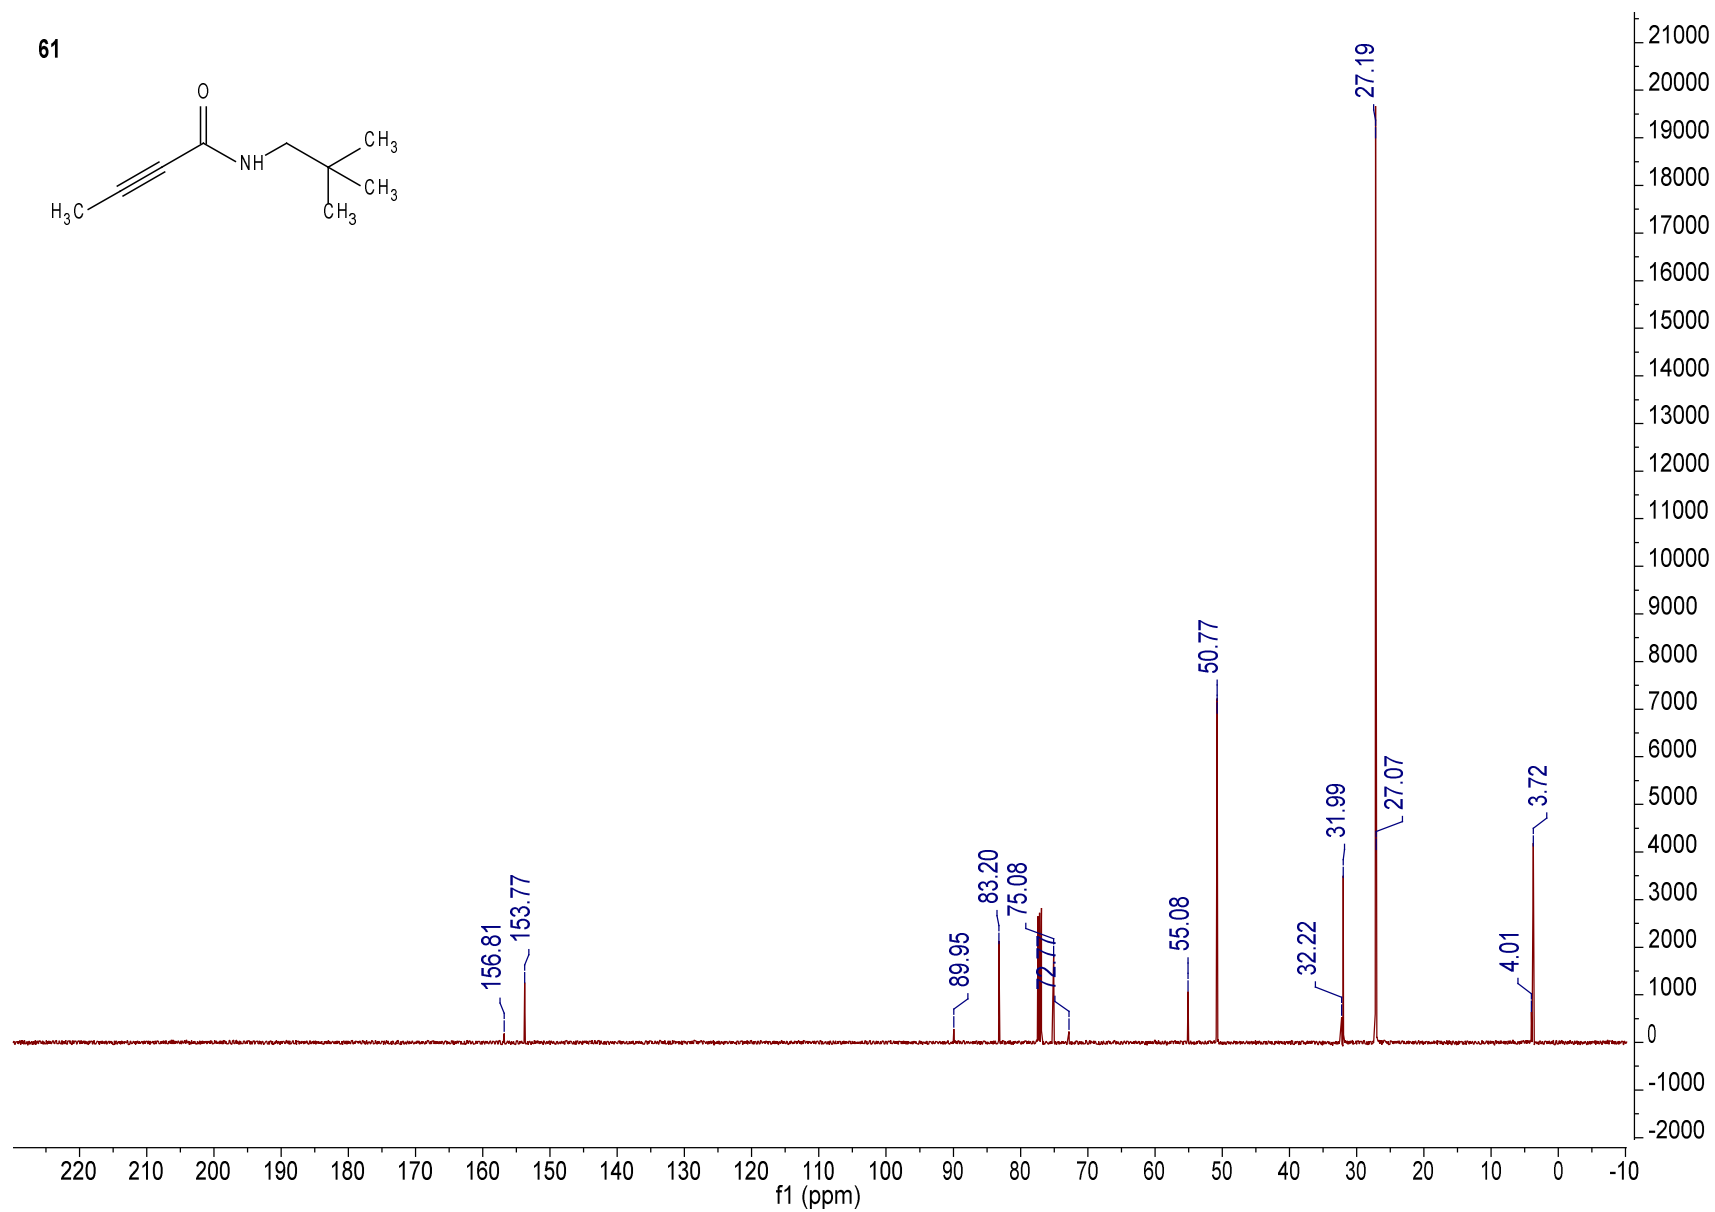

62

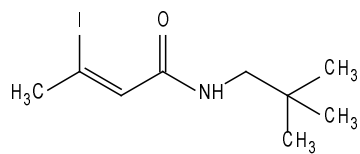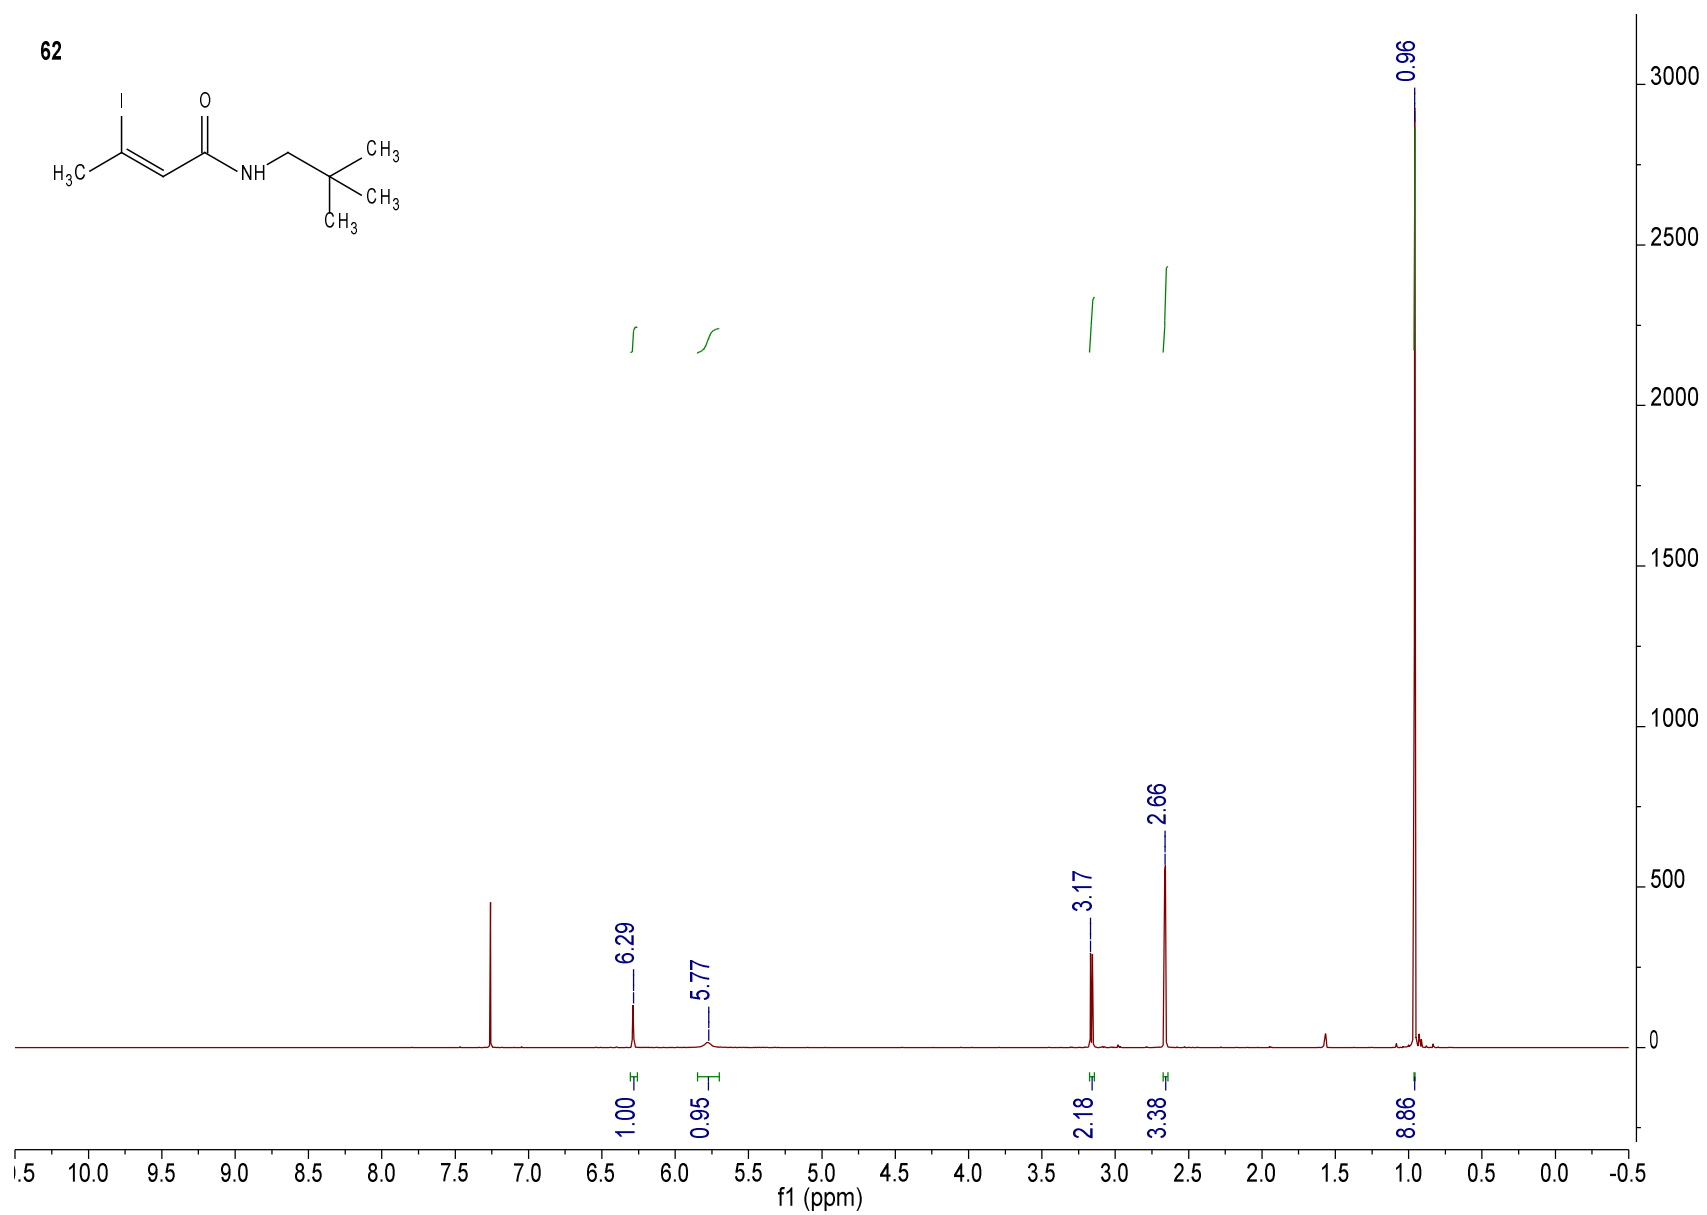

62

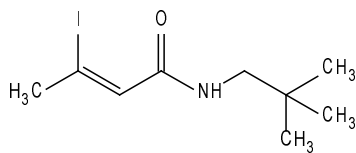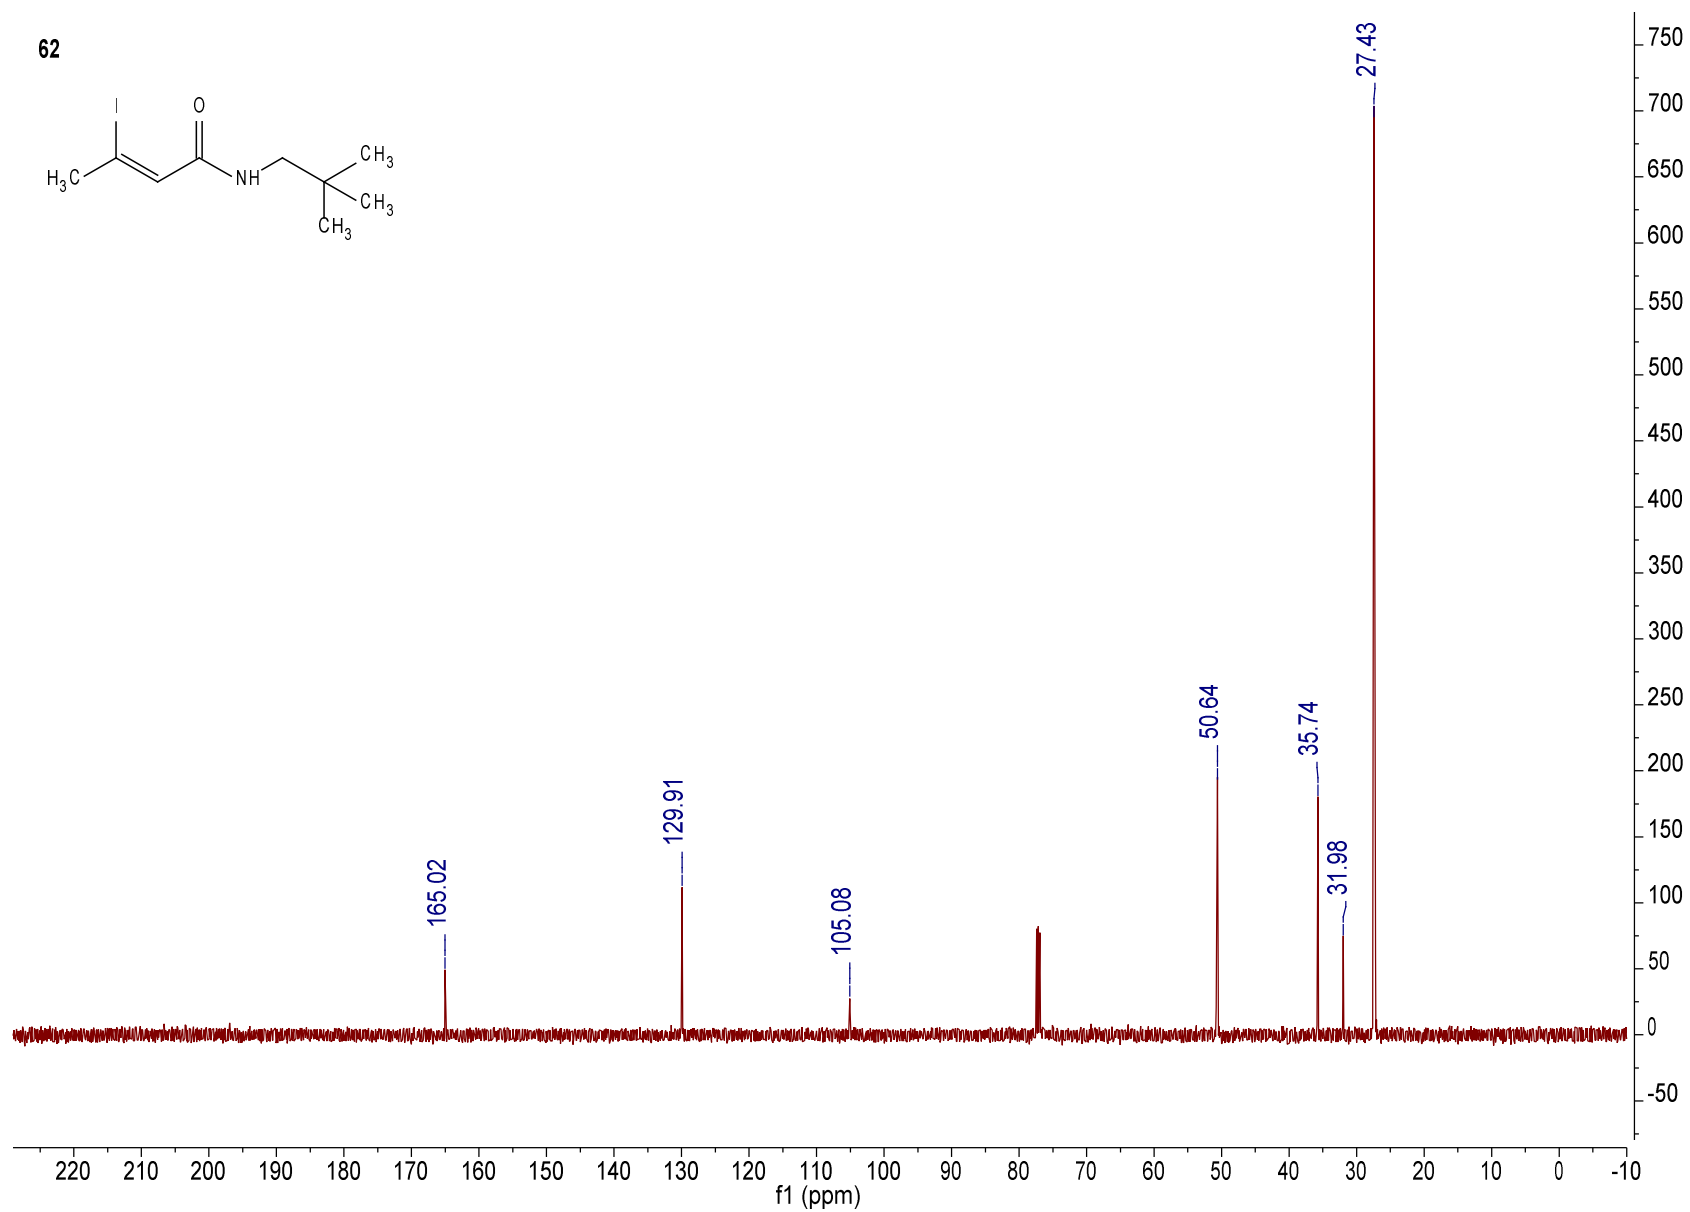

22

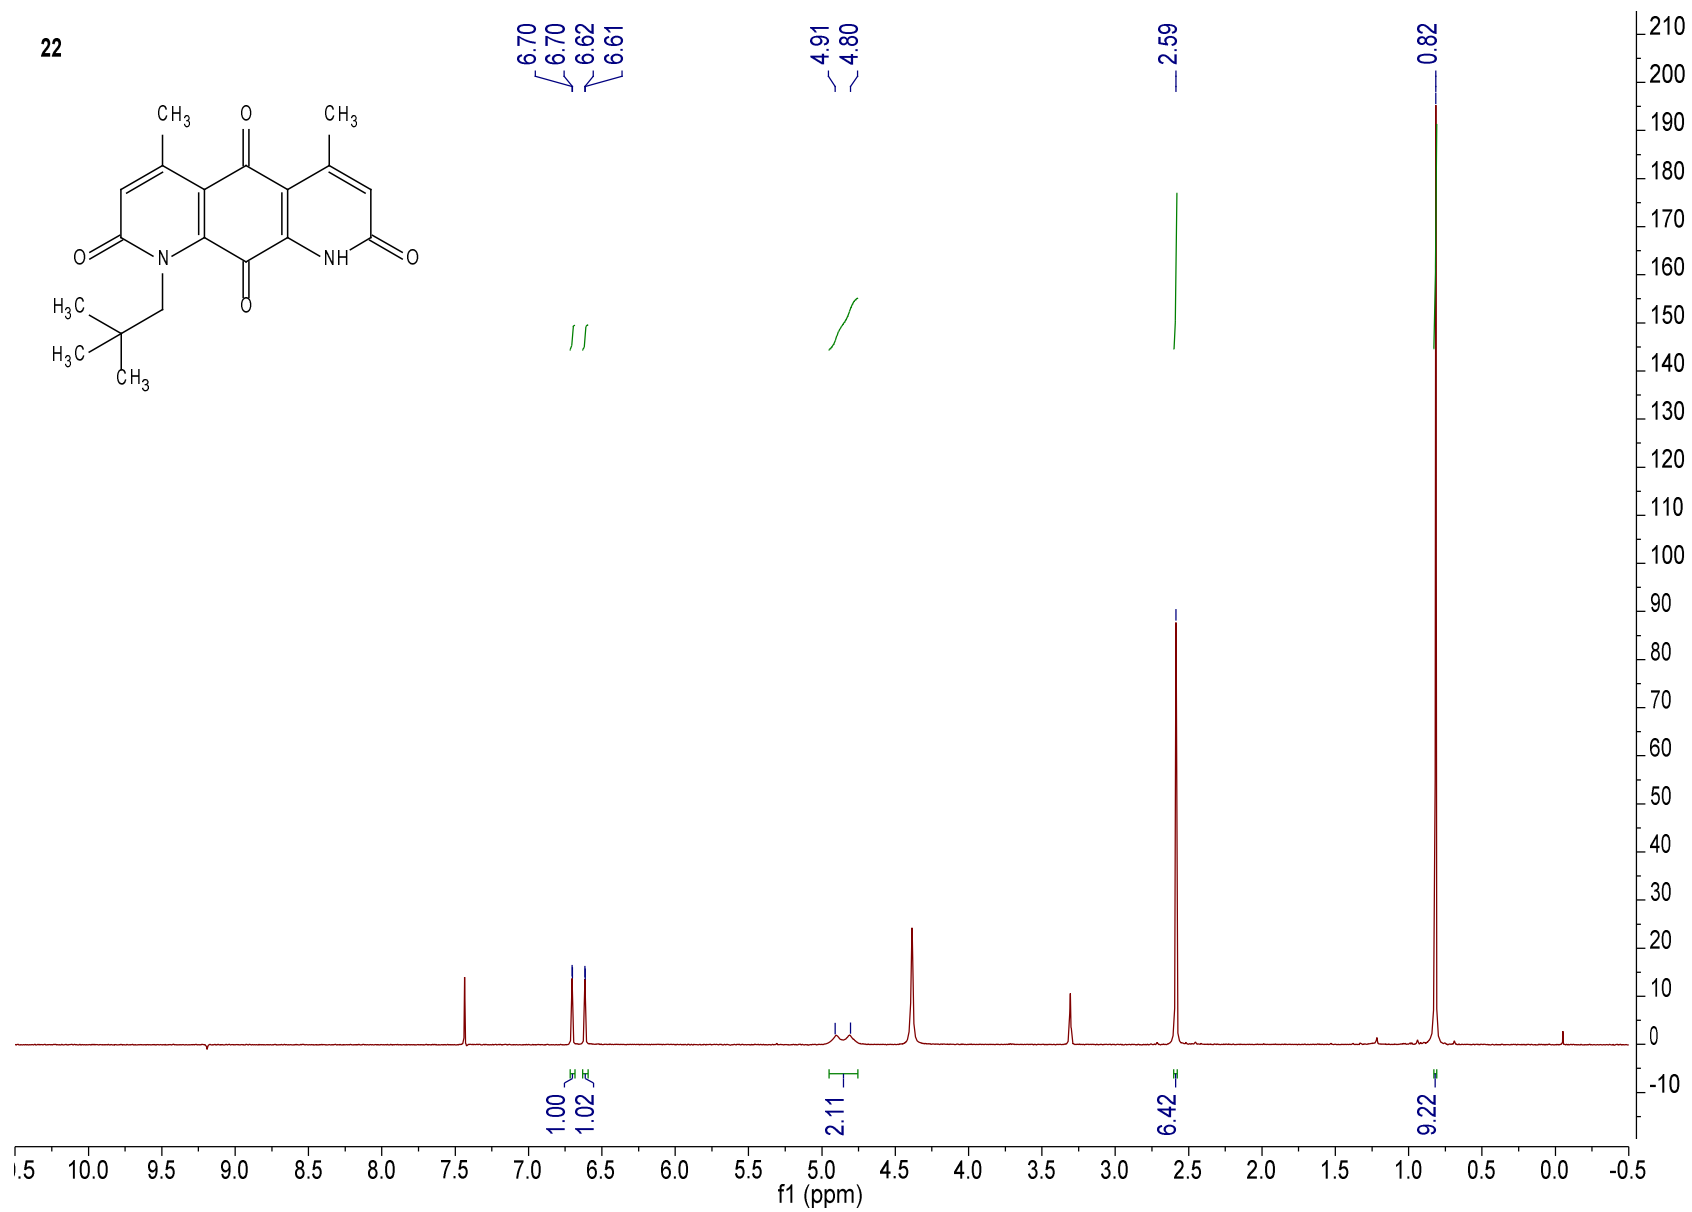



22

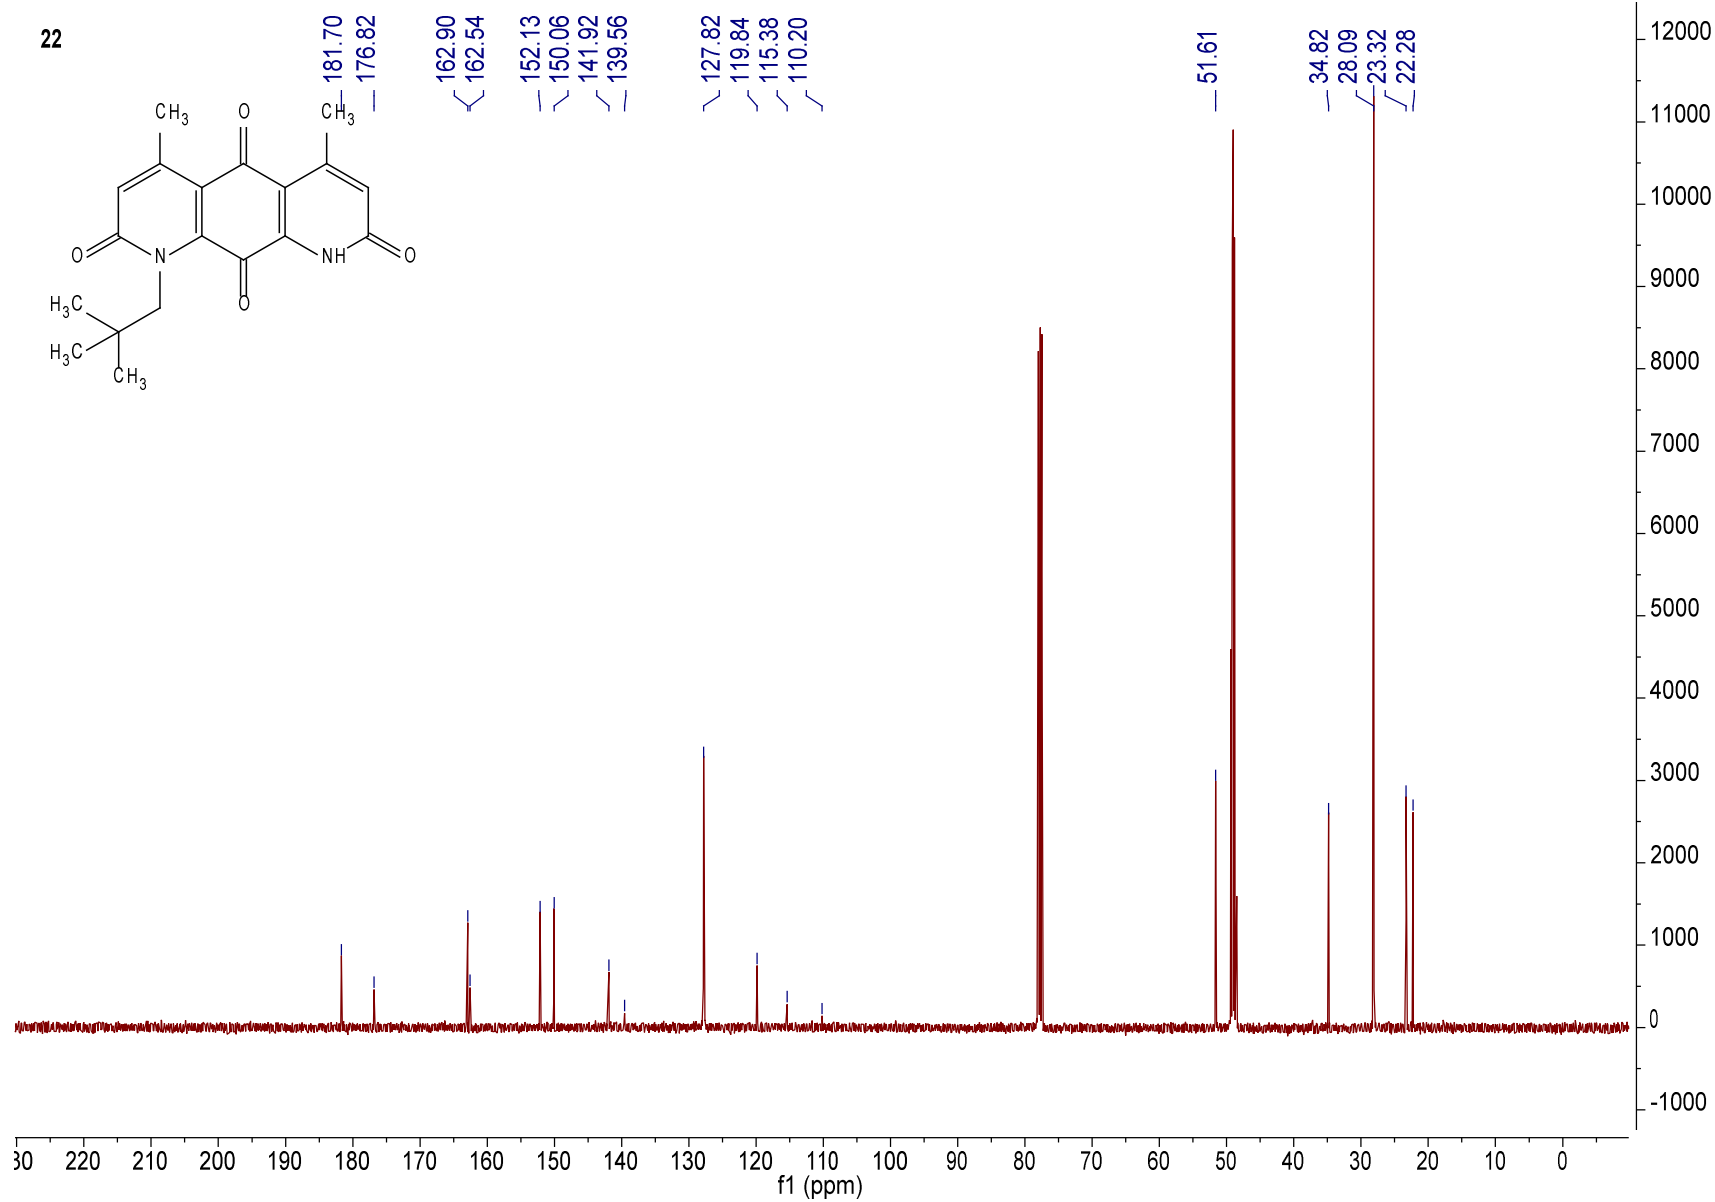

63

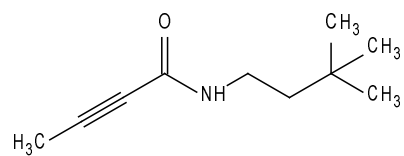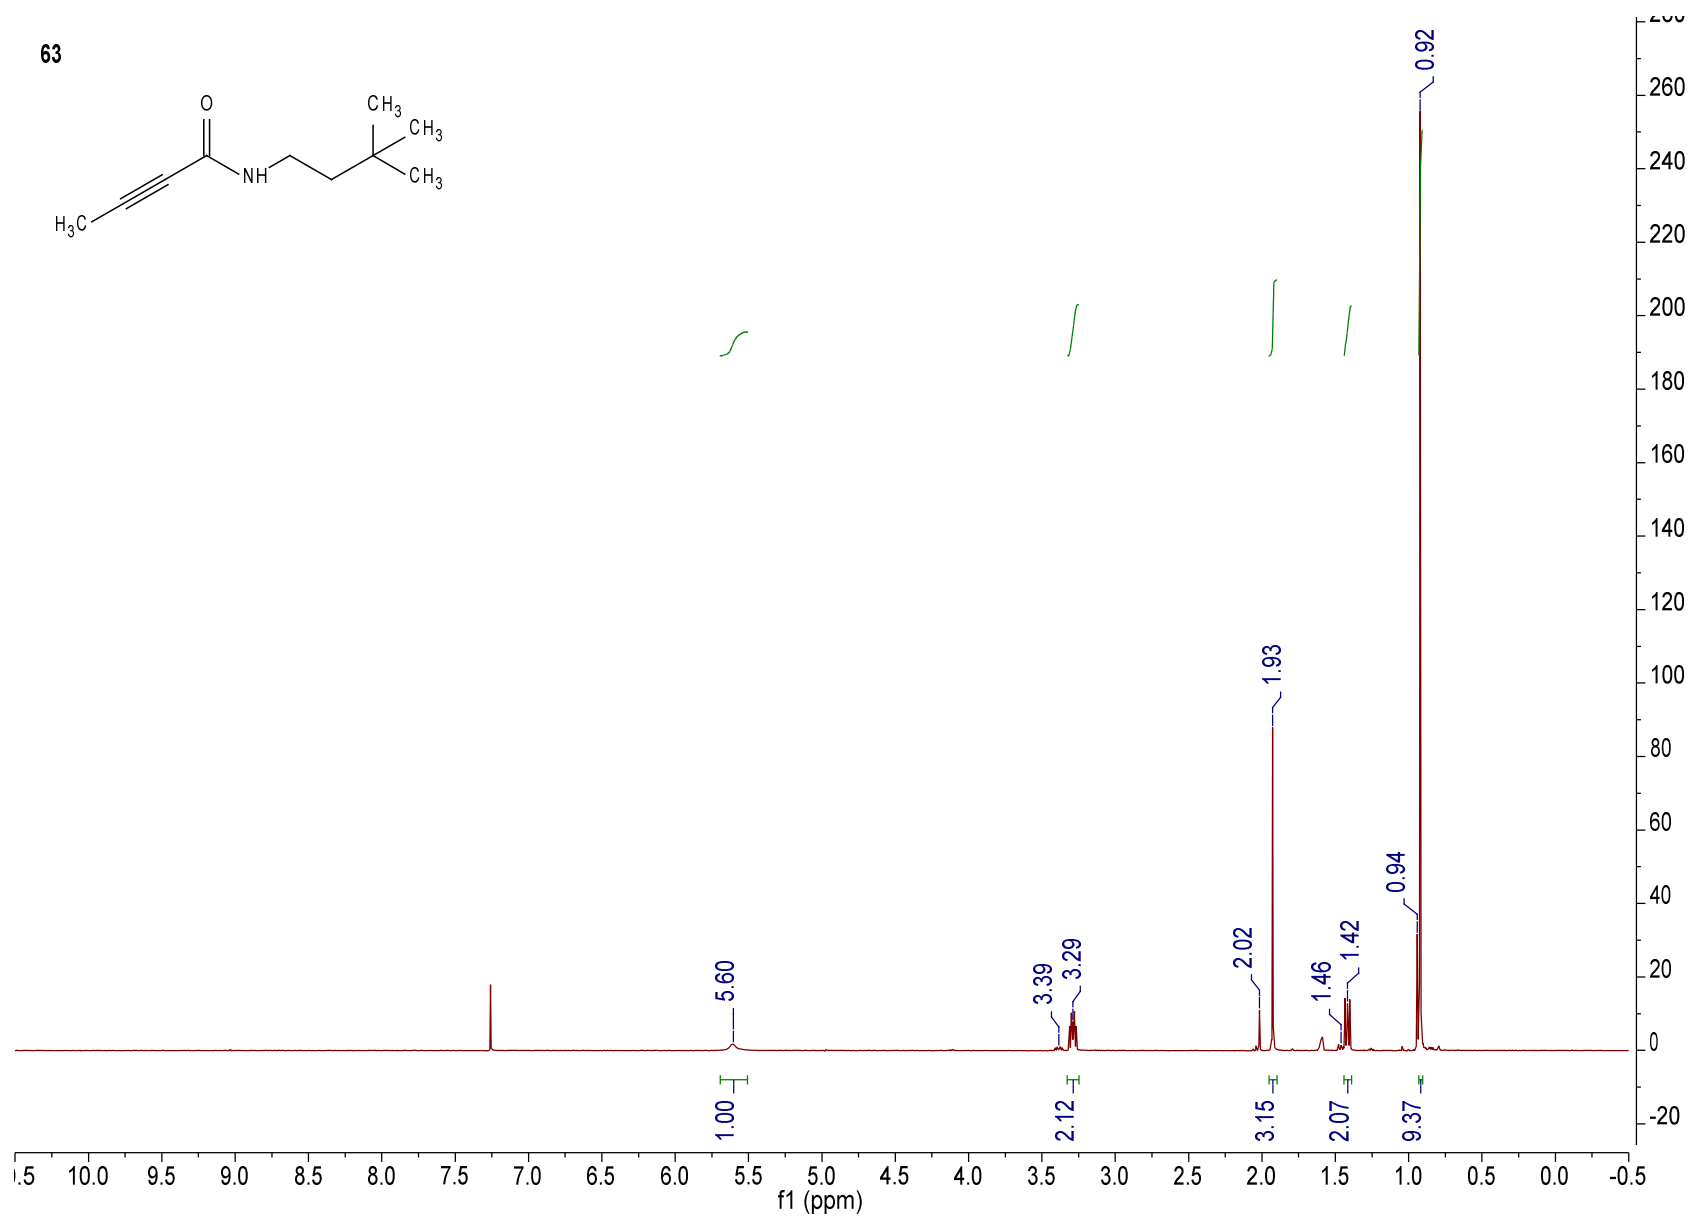

63

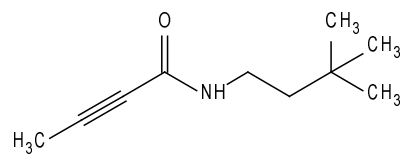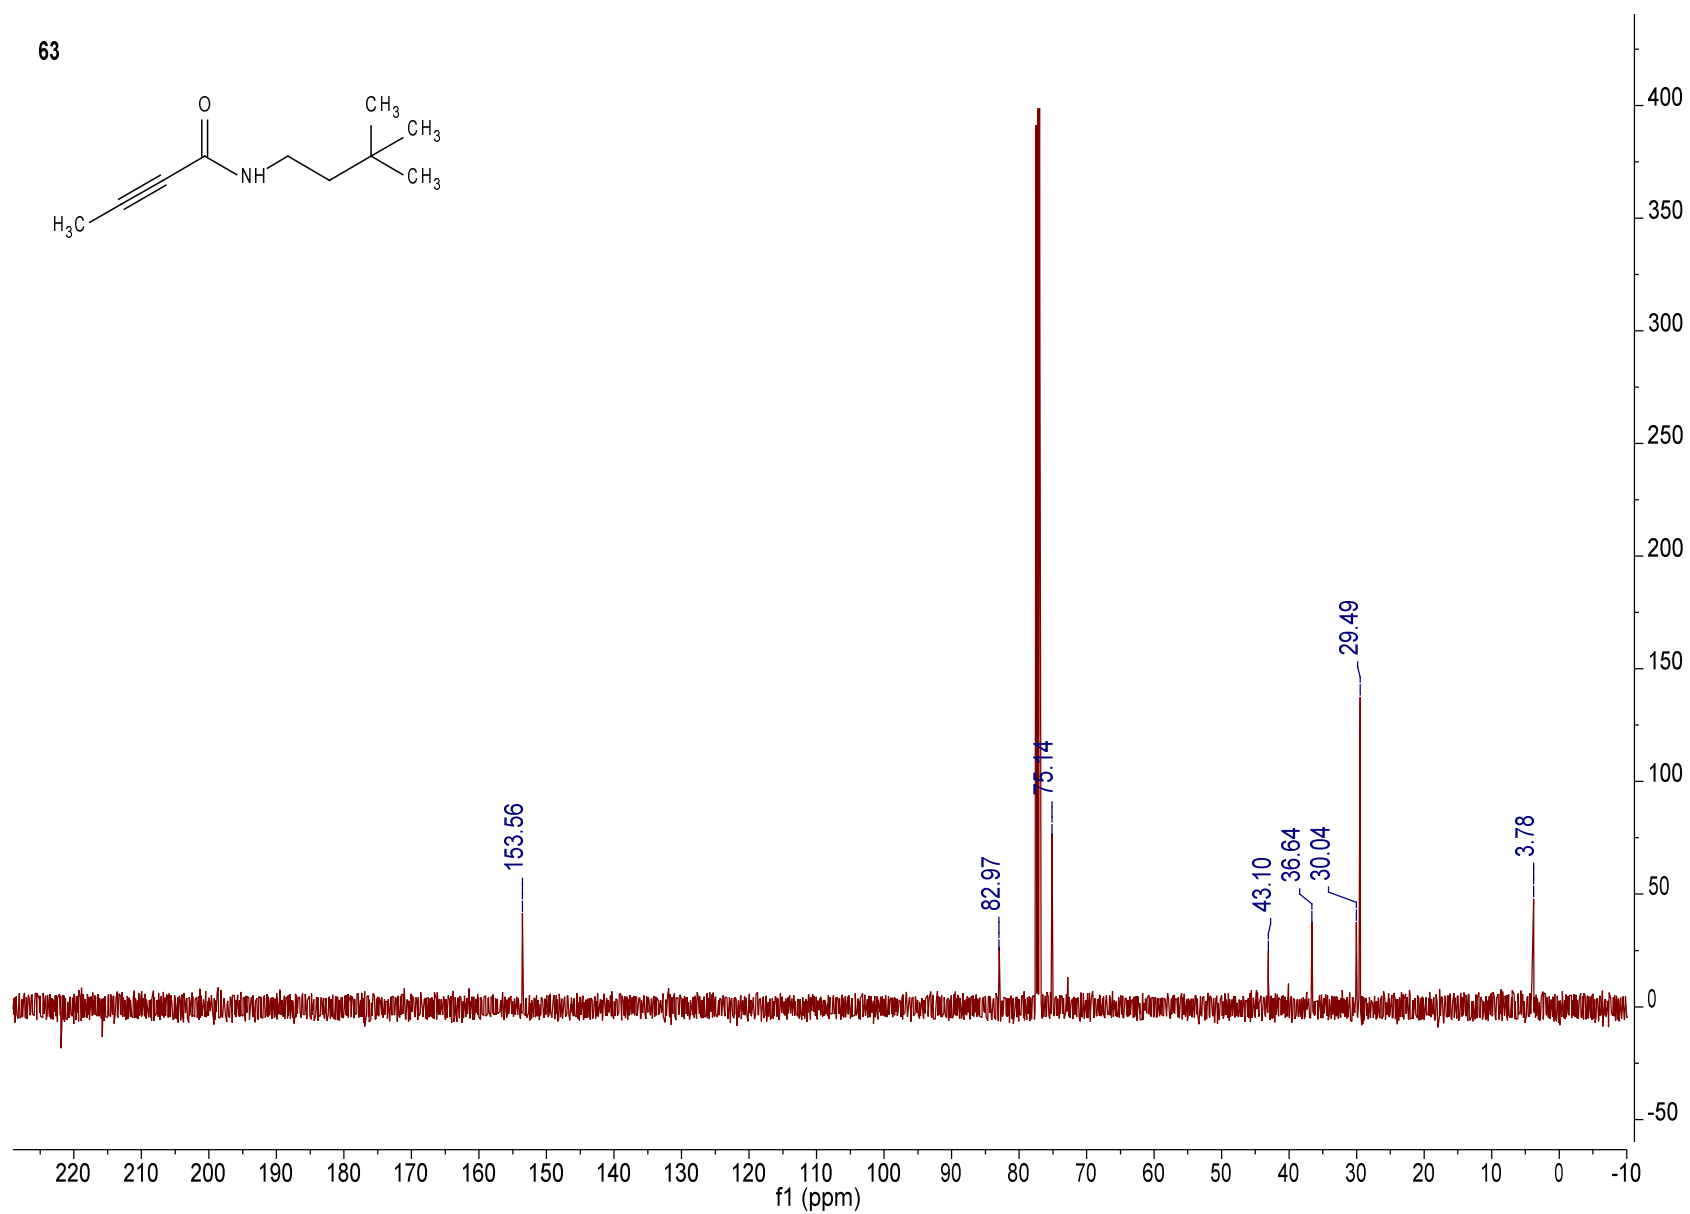

64

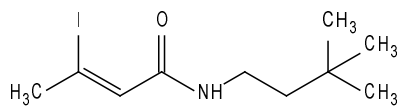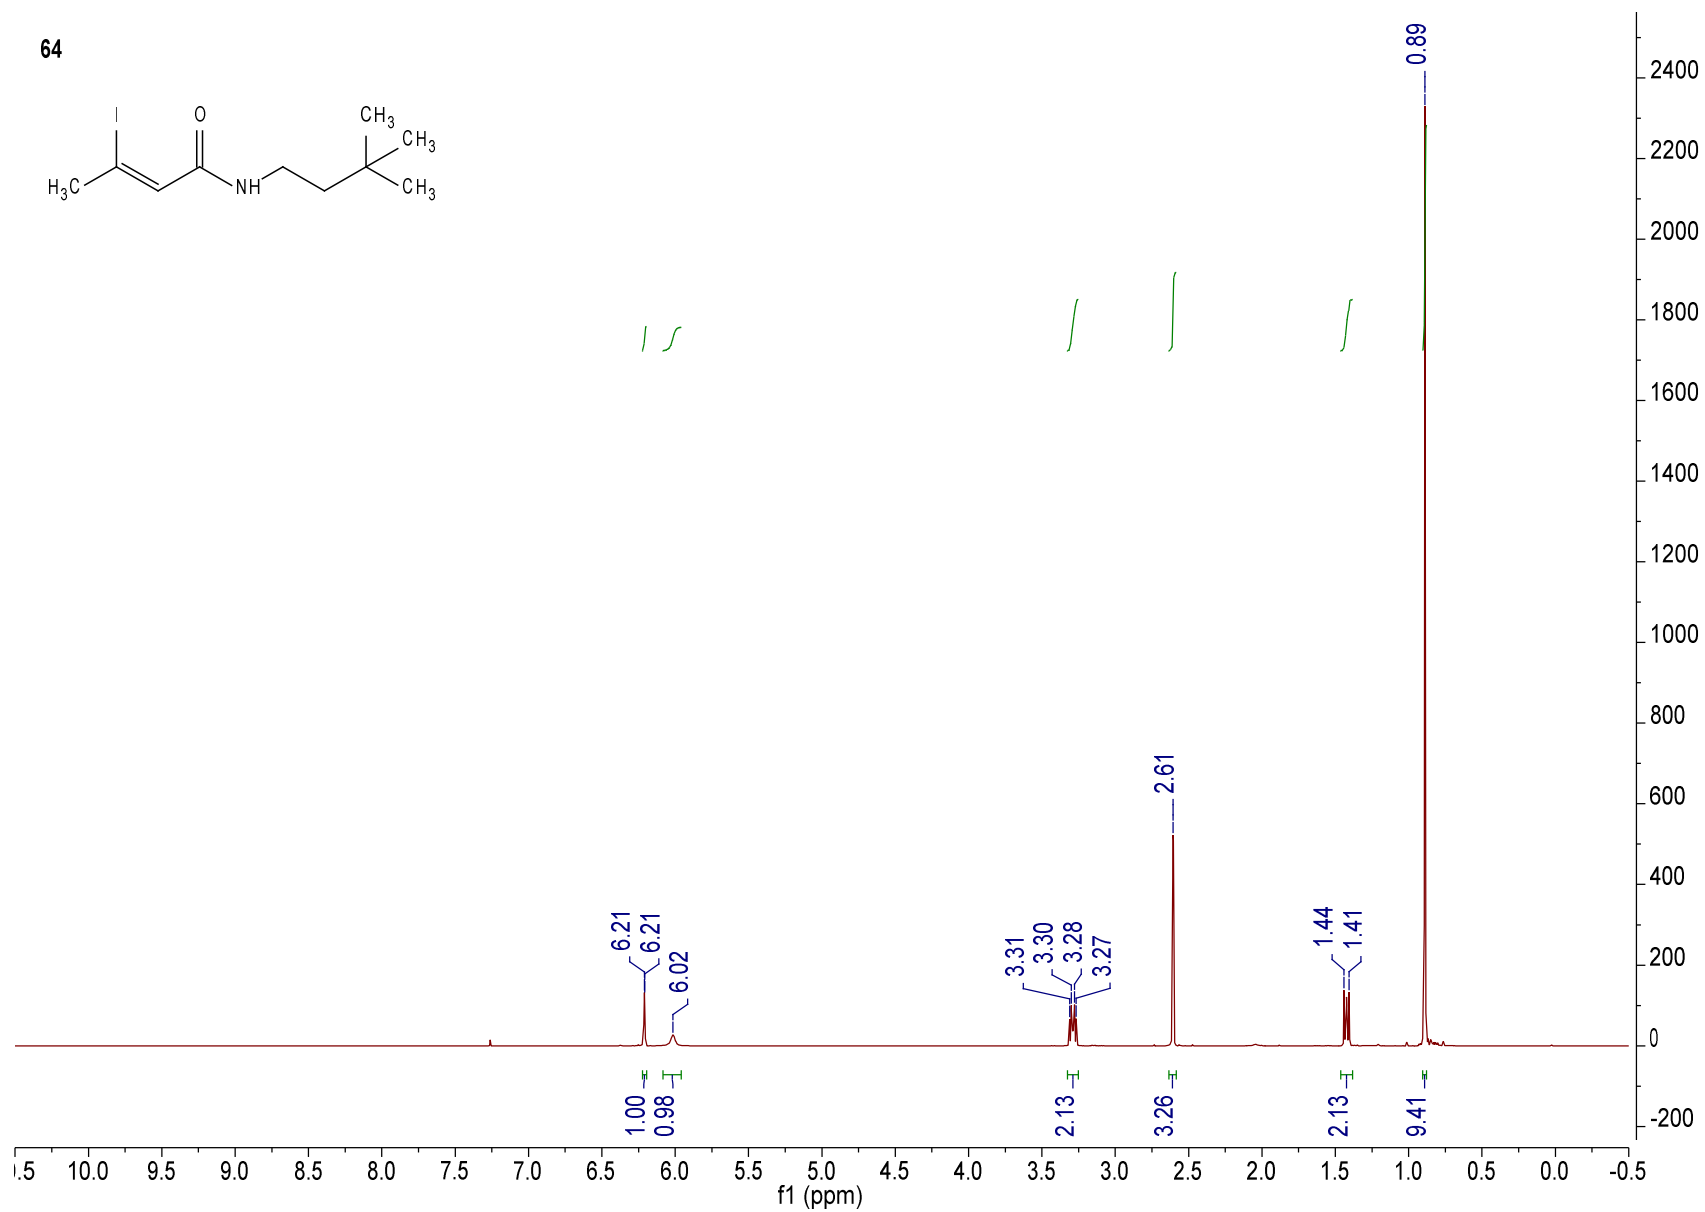

64

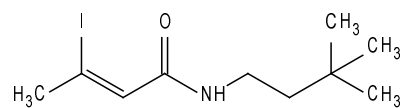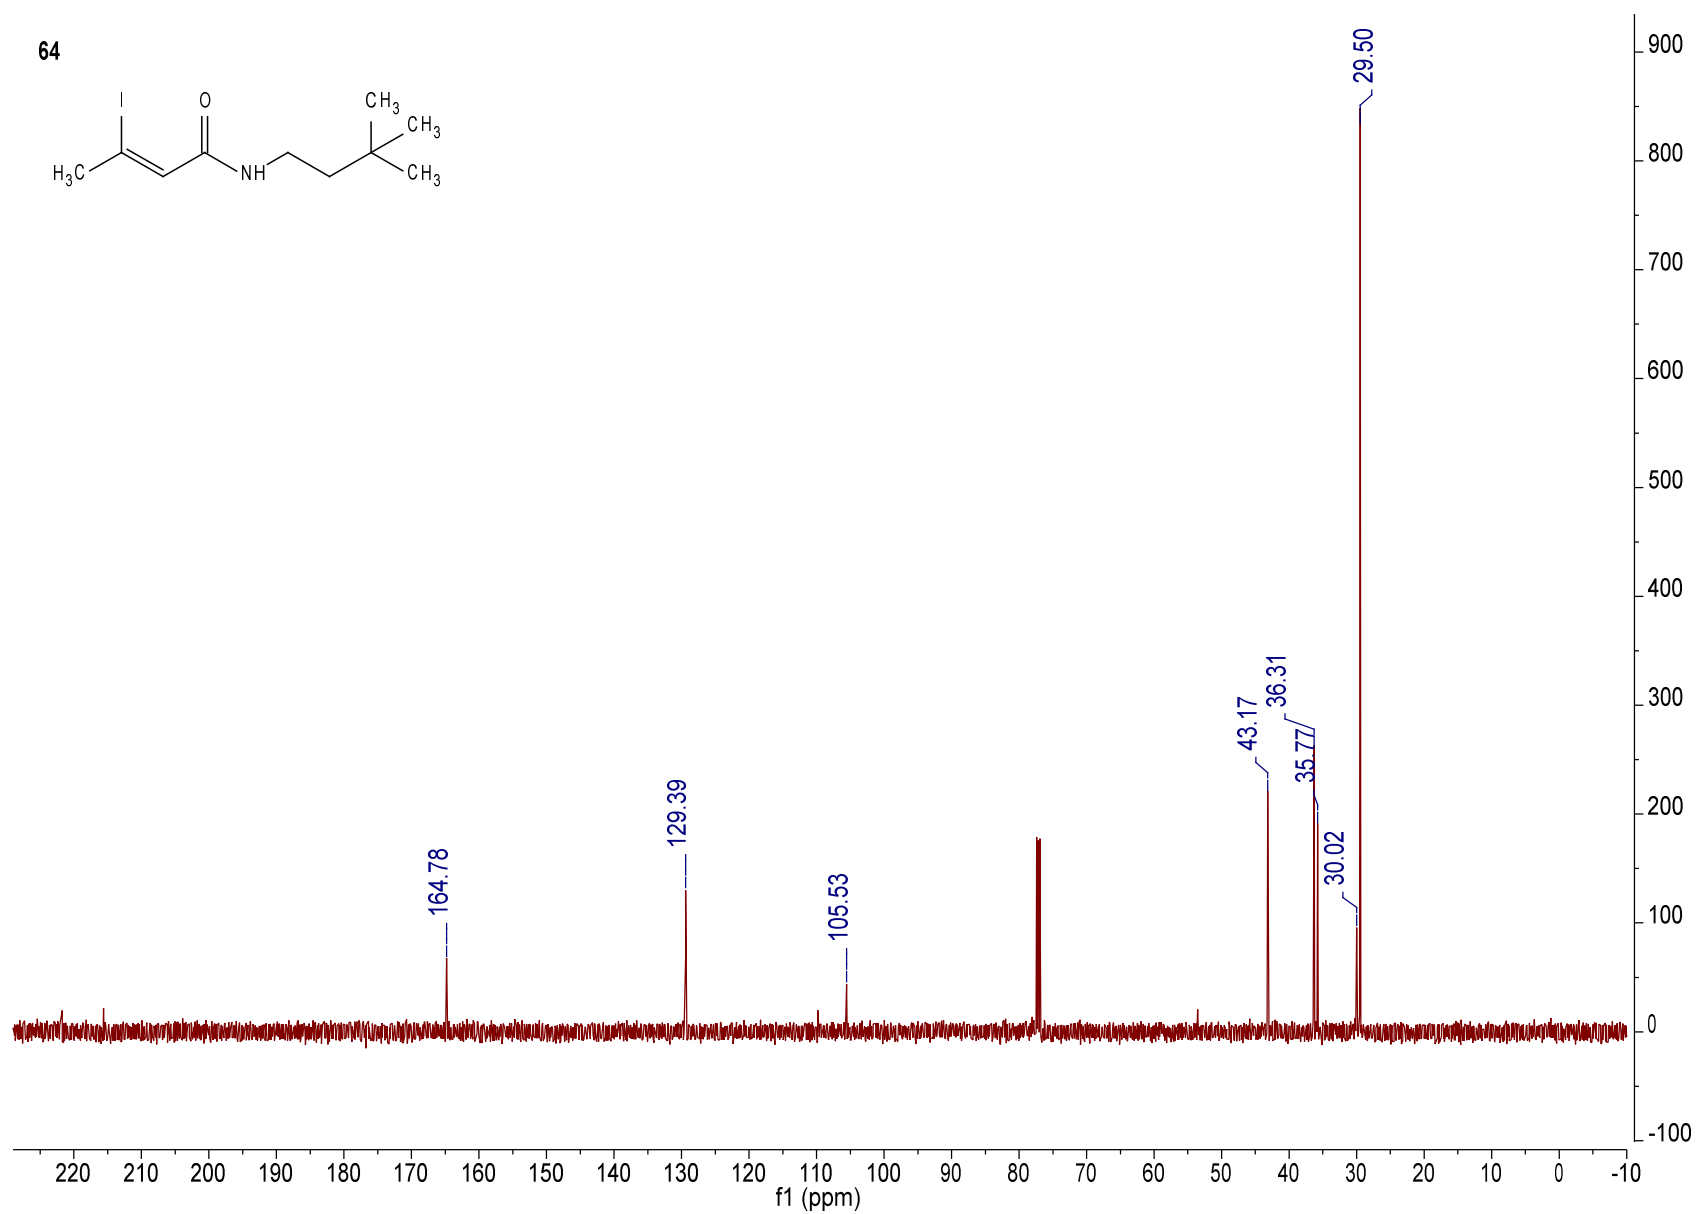

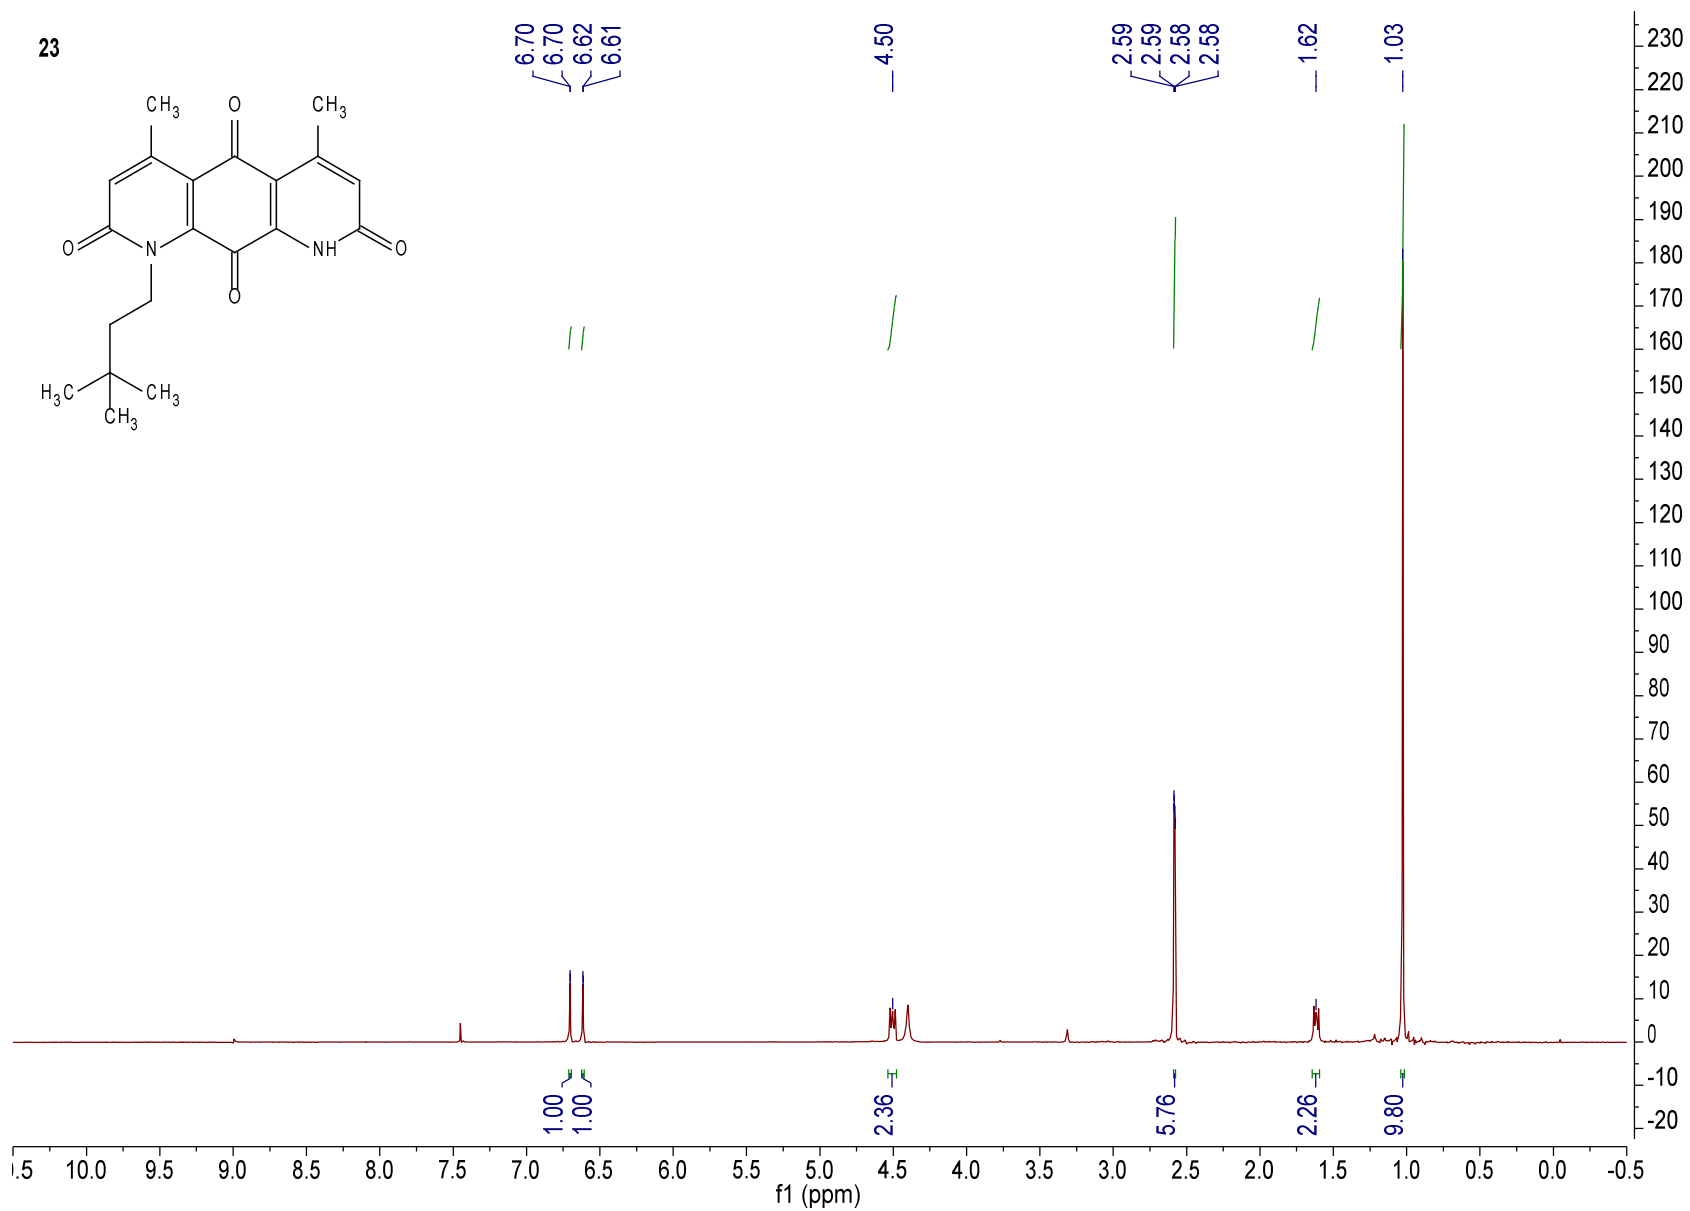

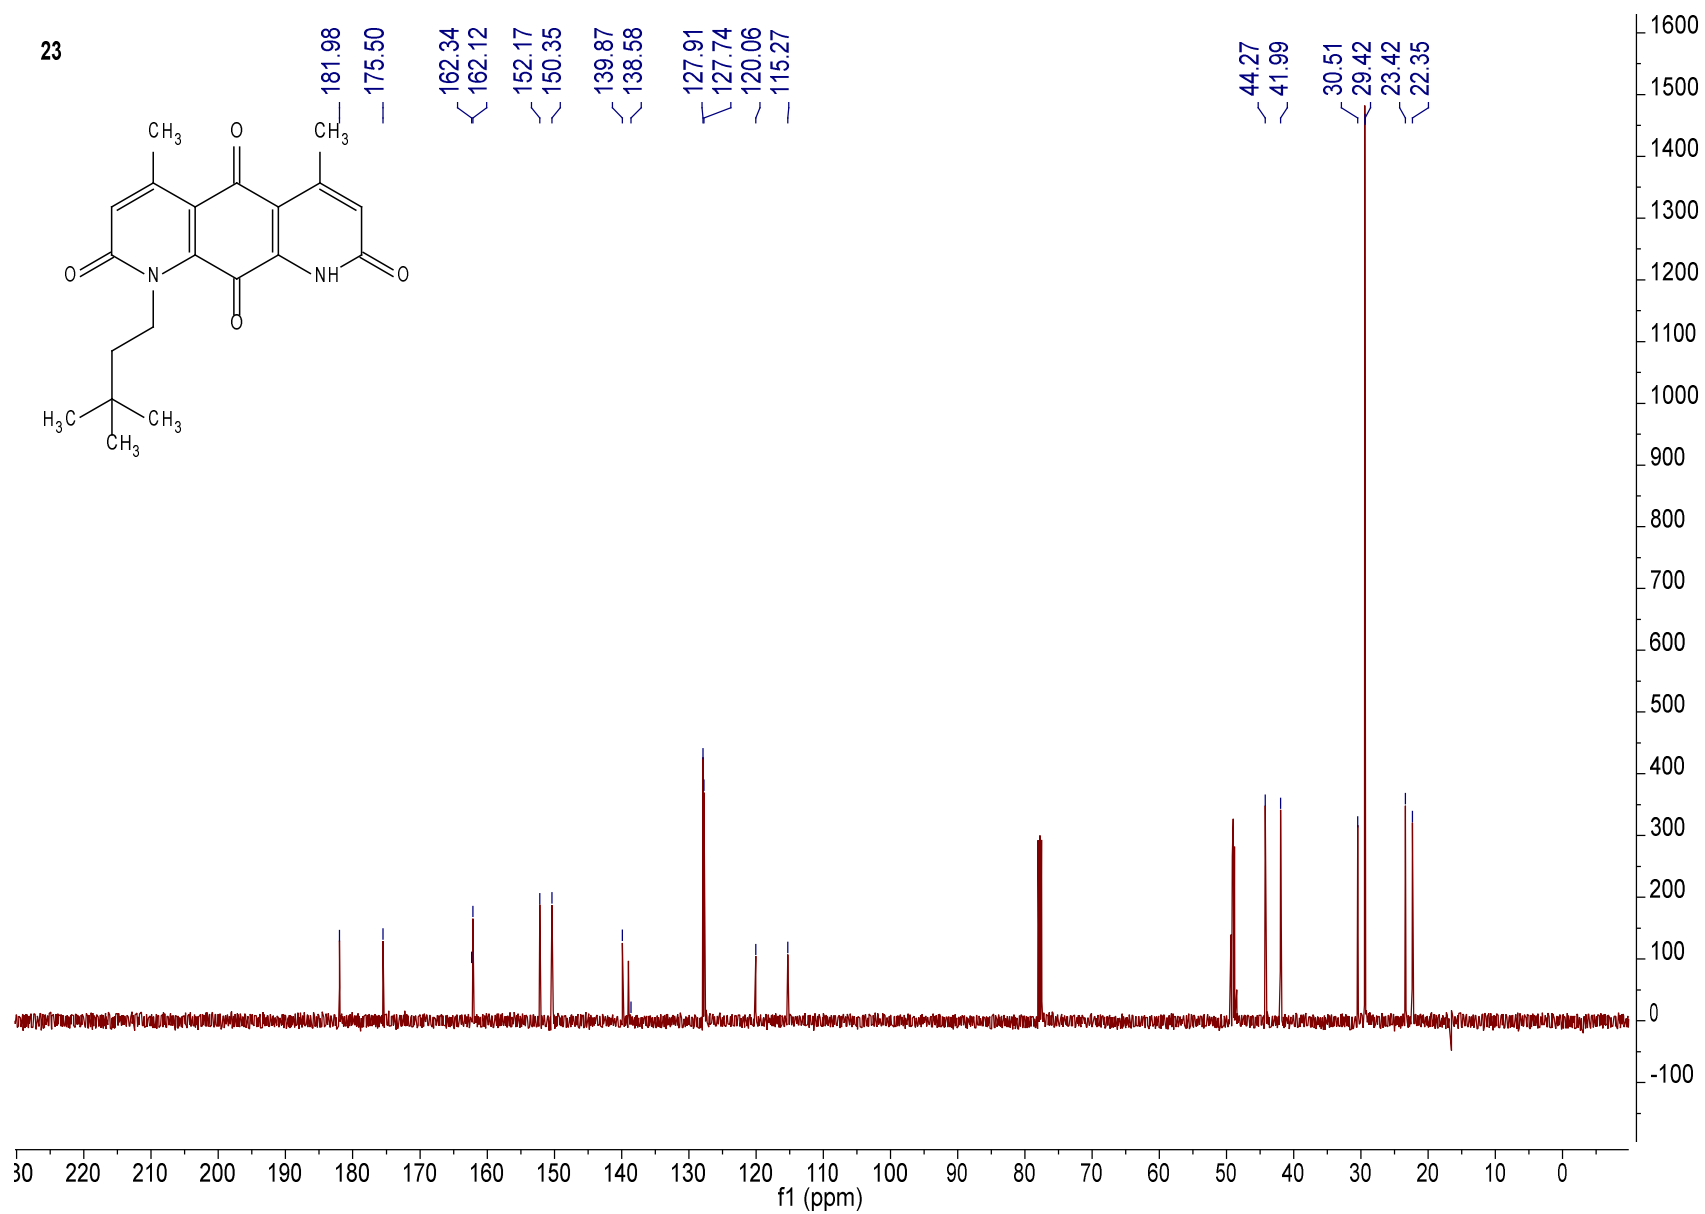

65

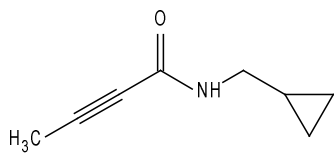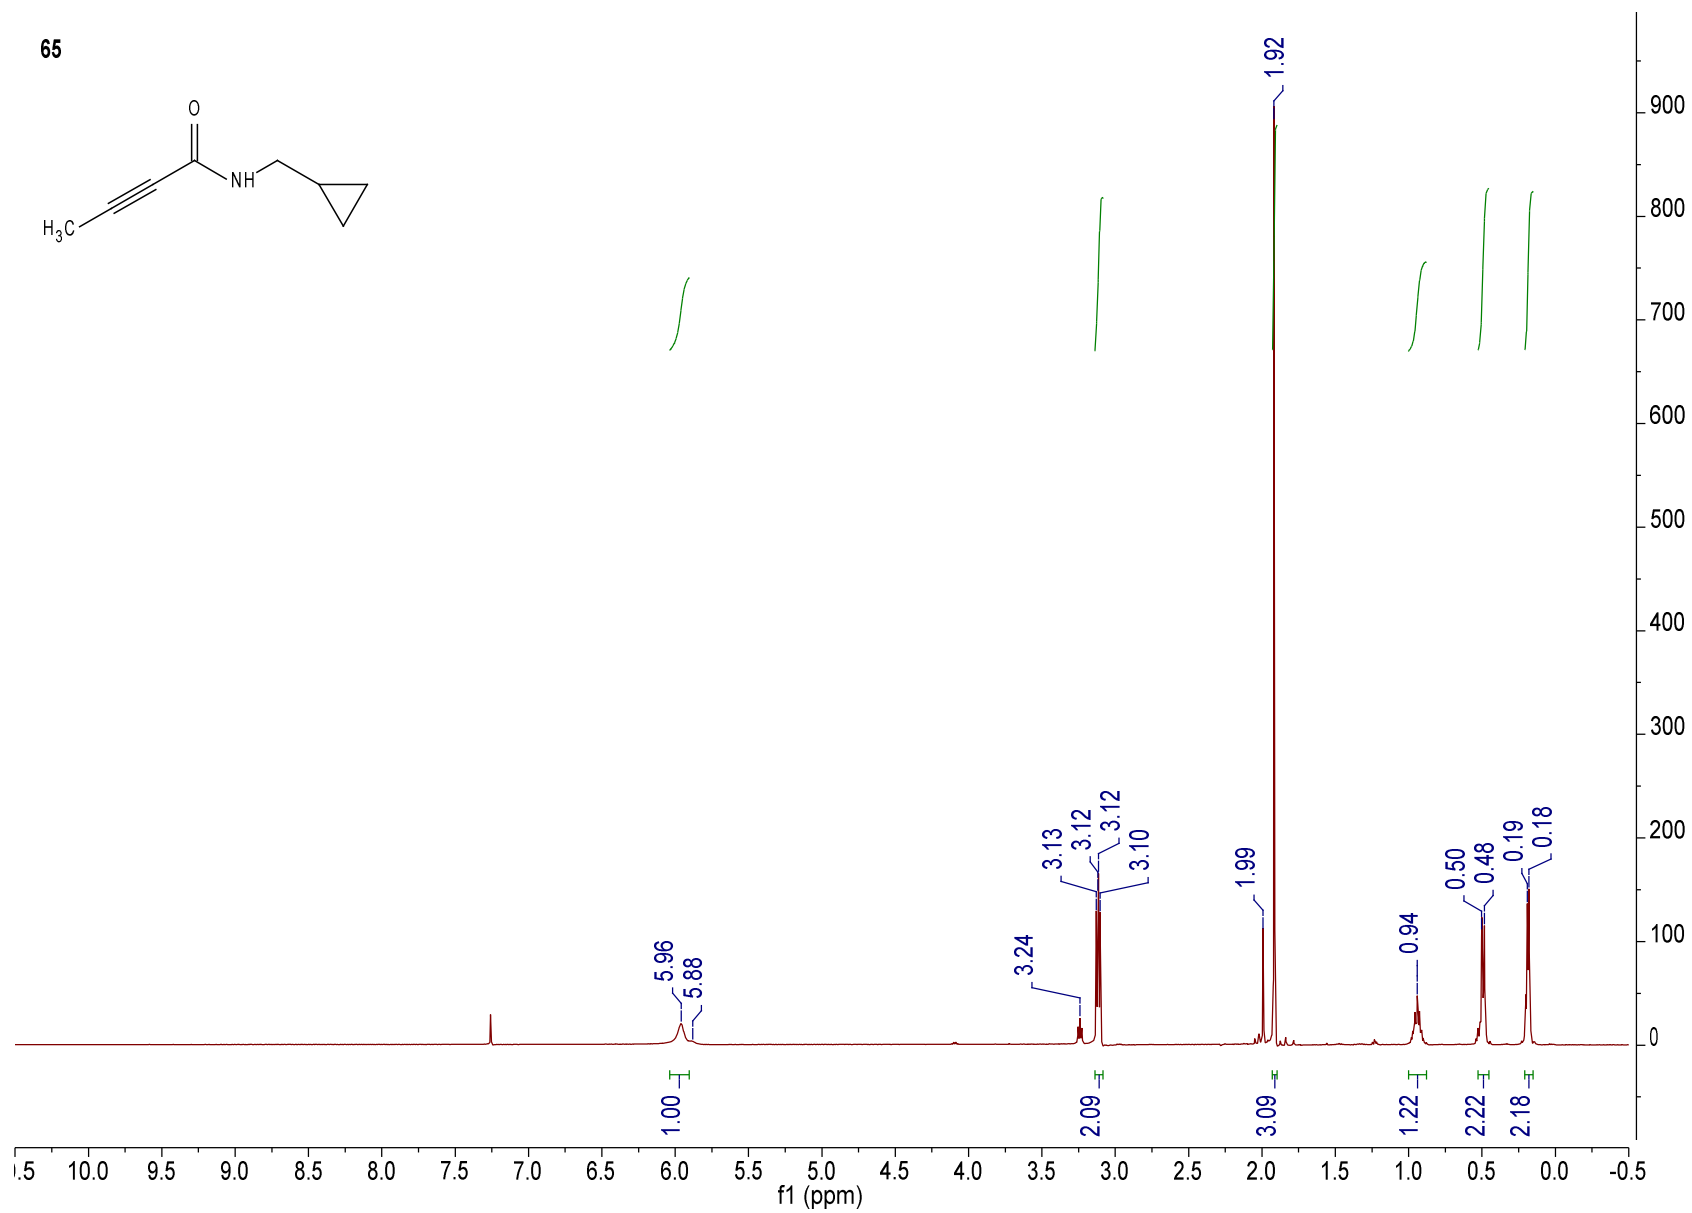



65

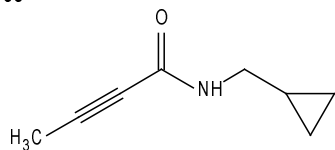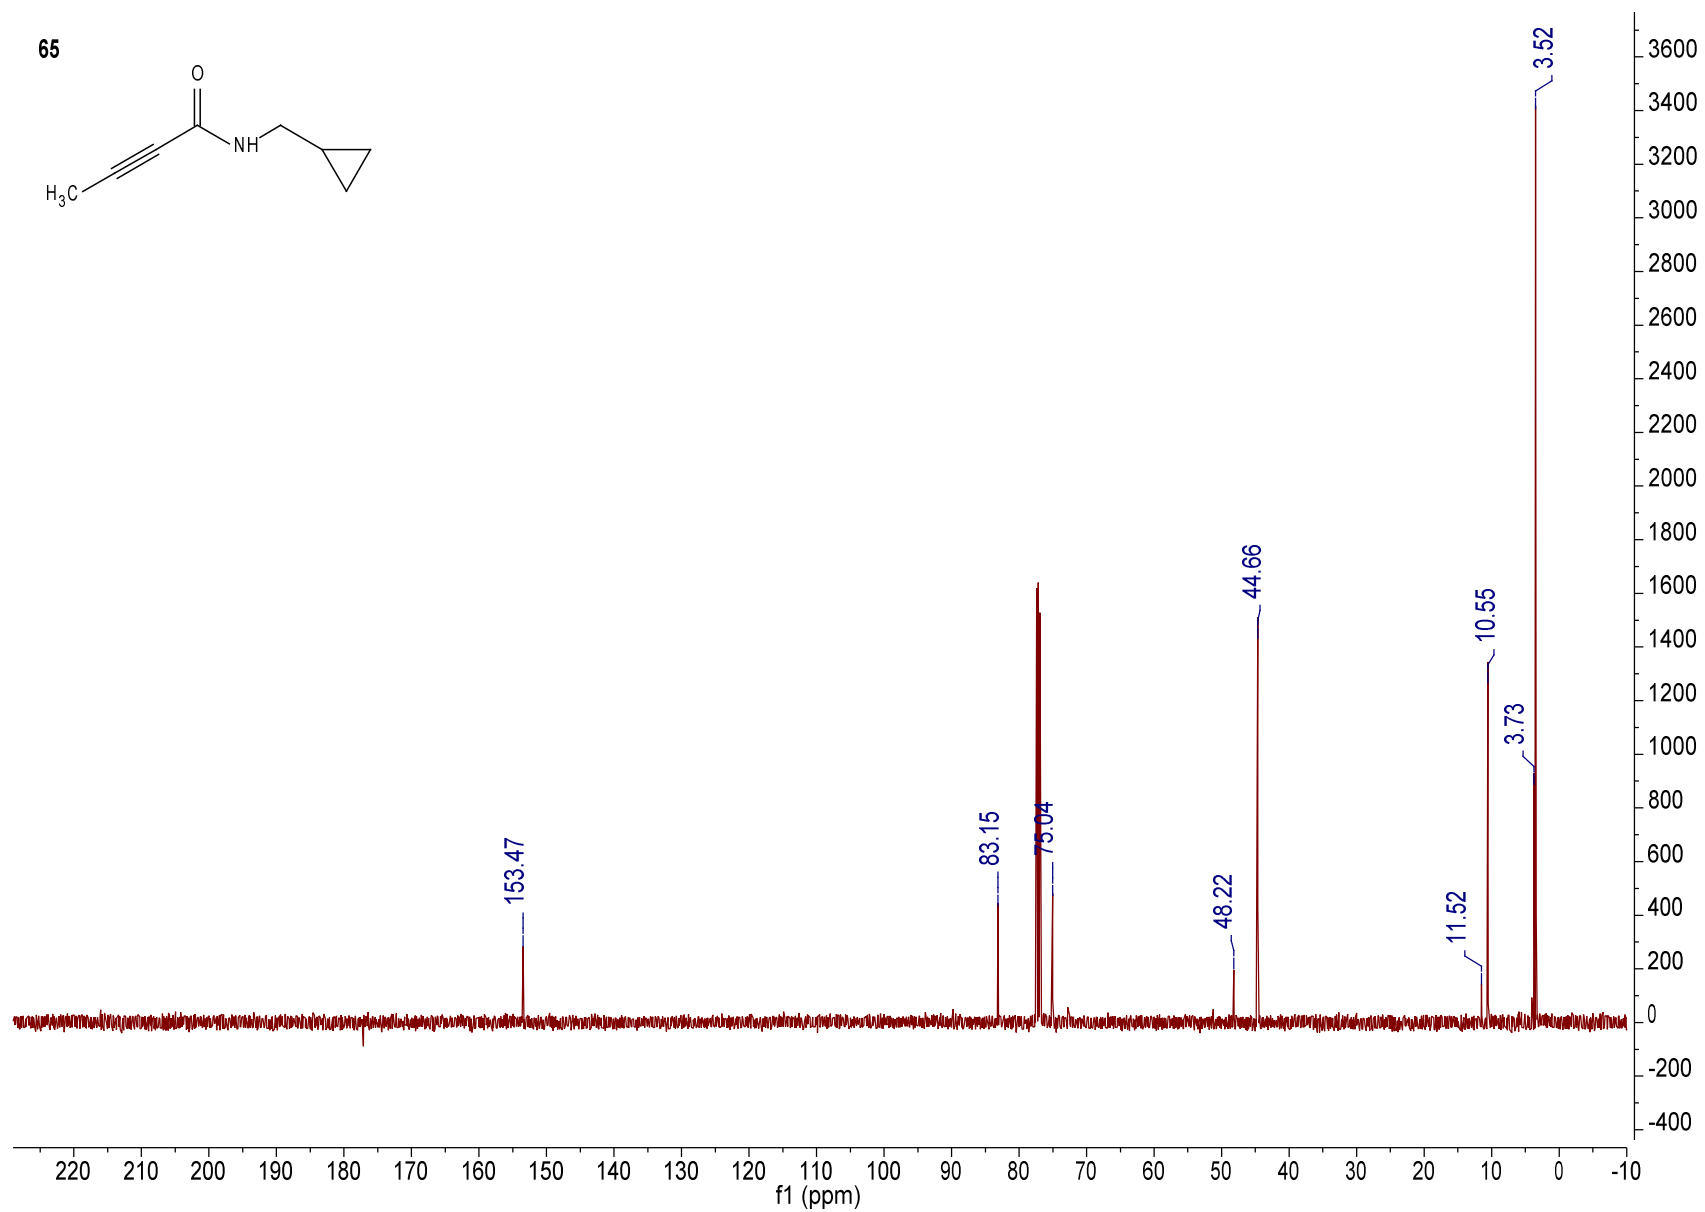

66

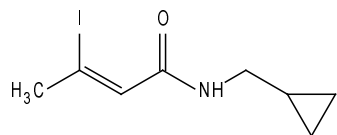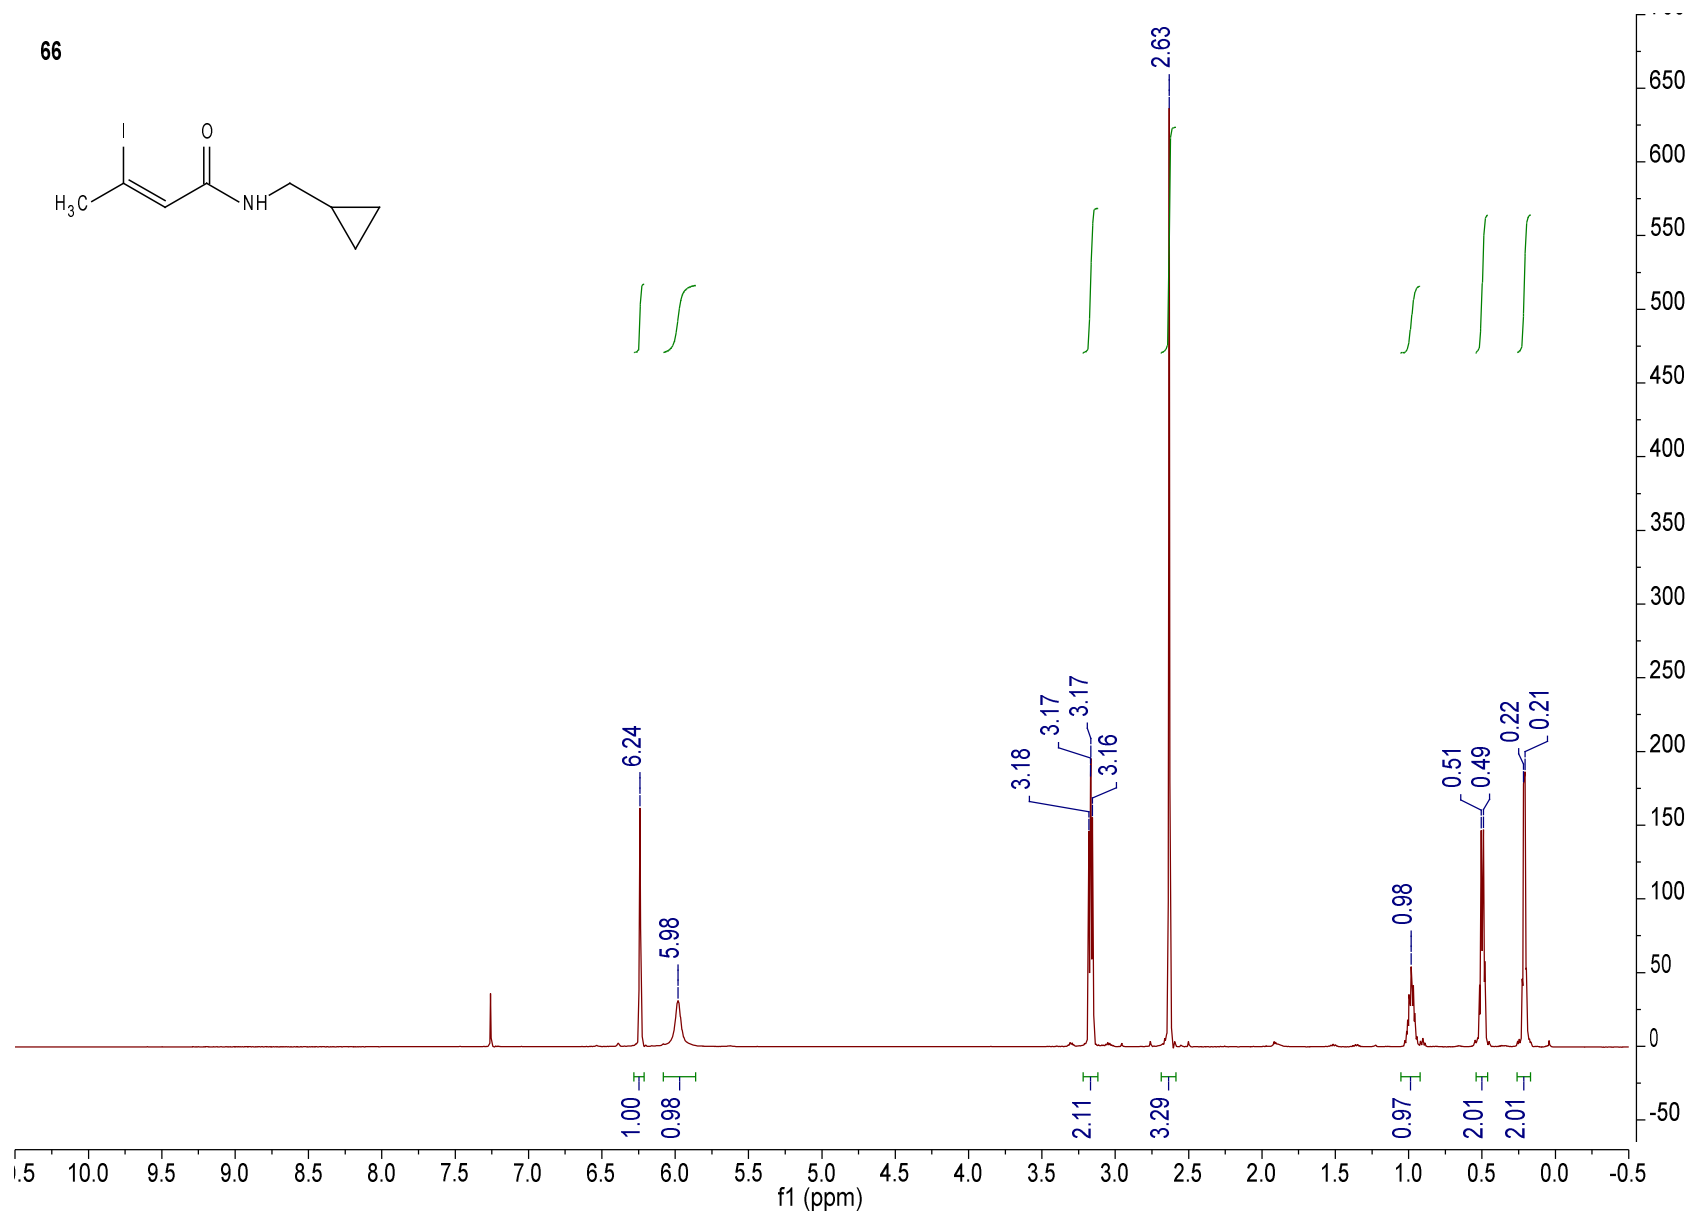

66

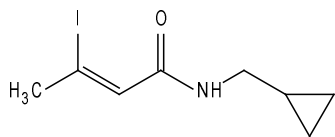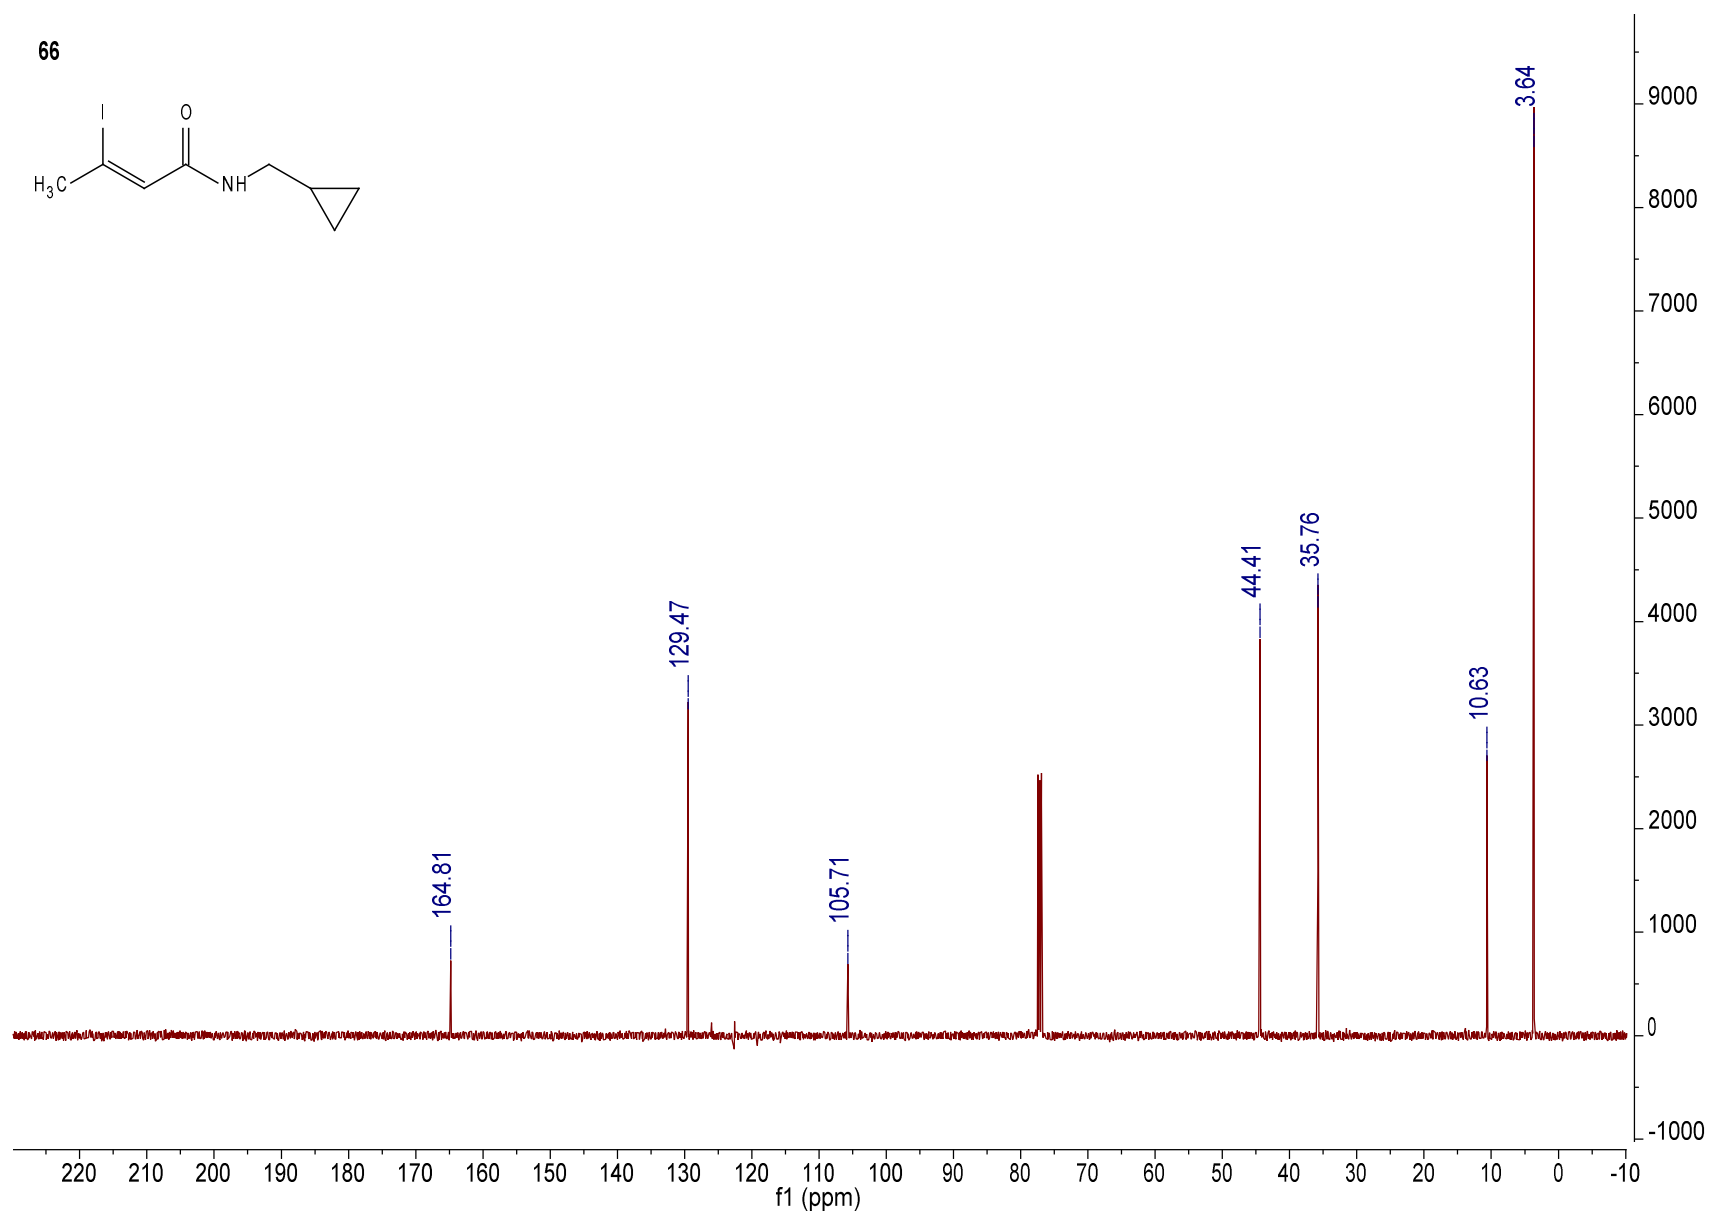

24

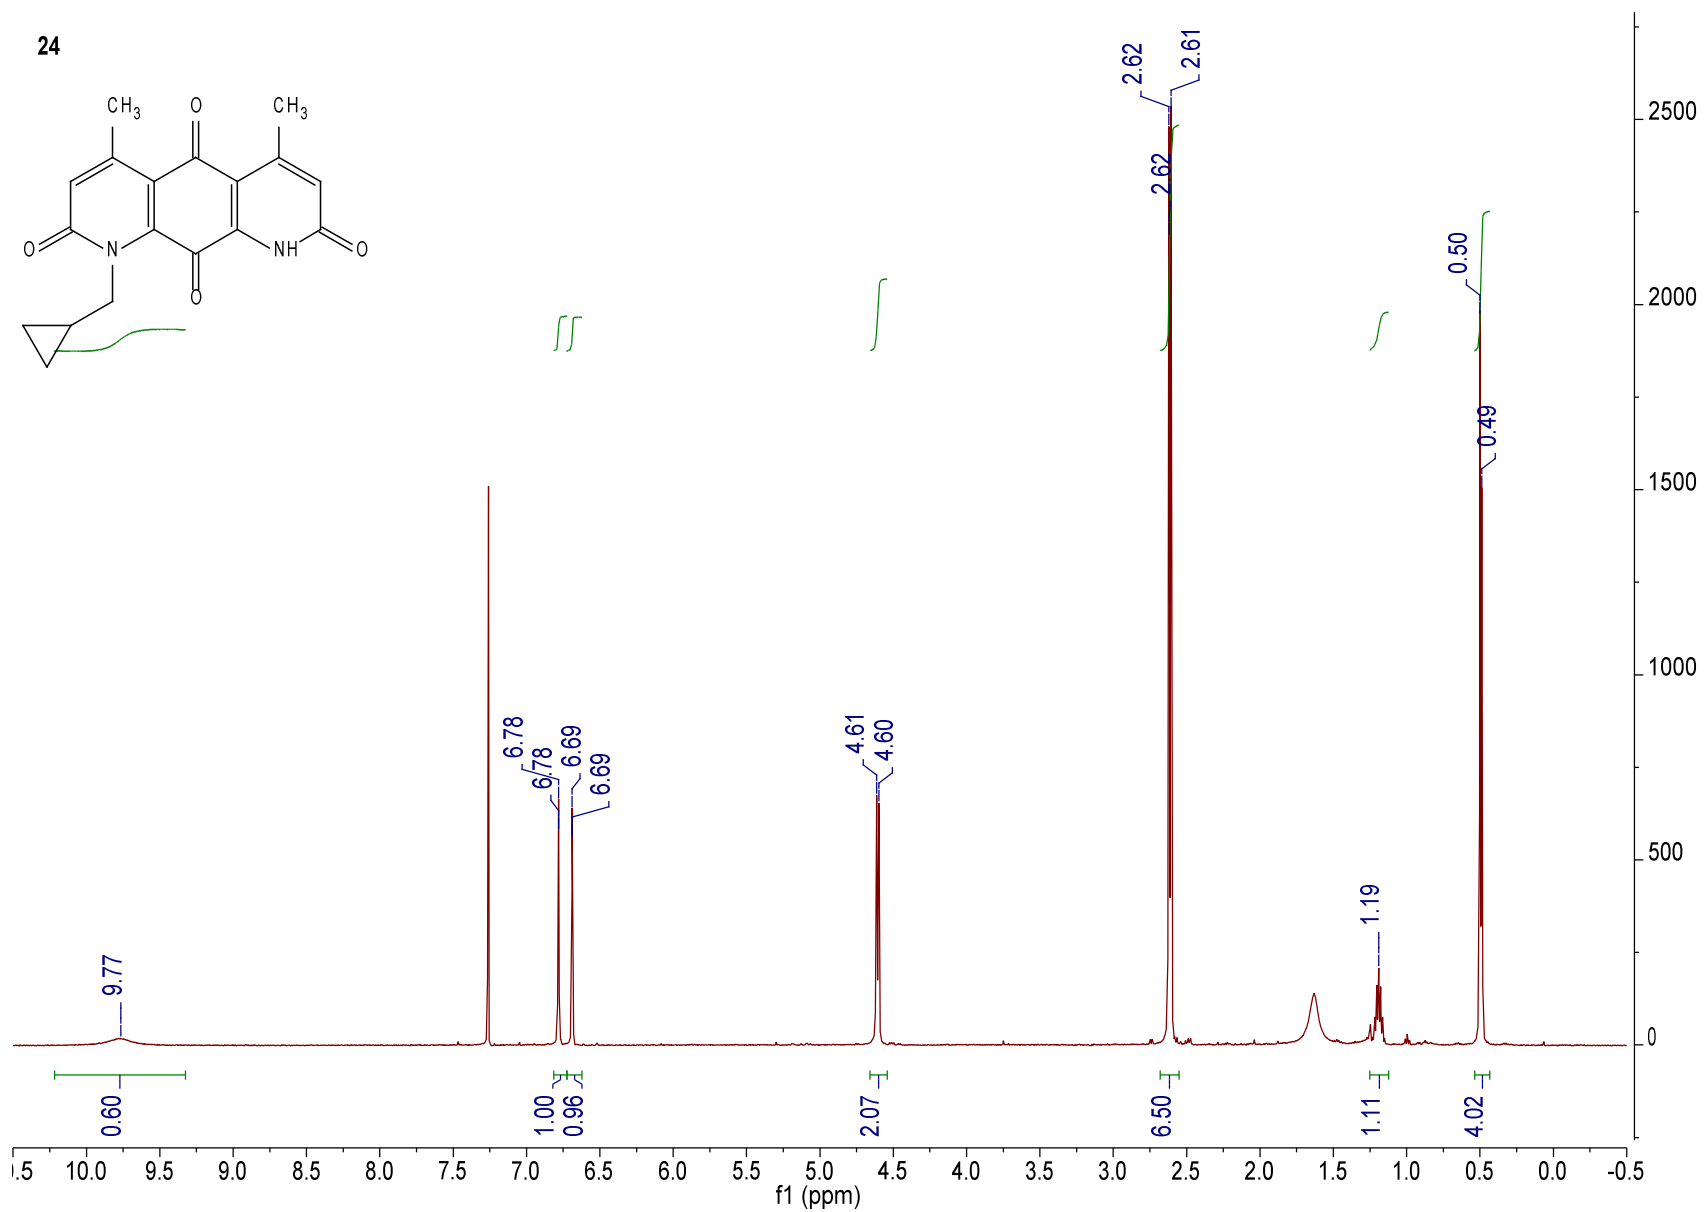

24

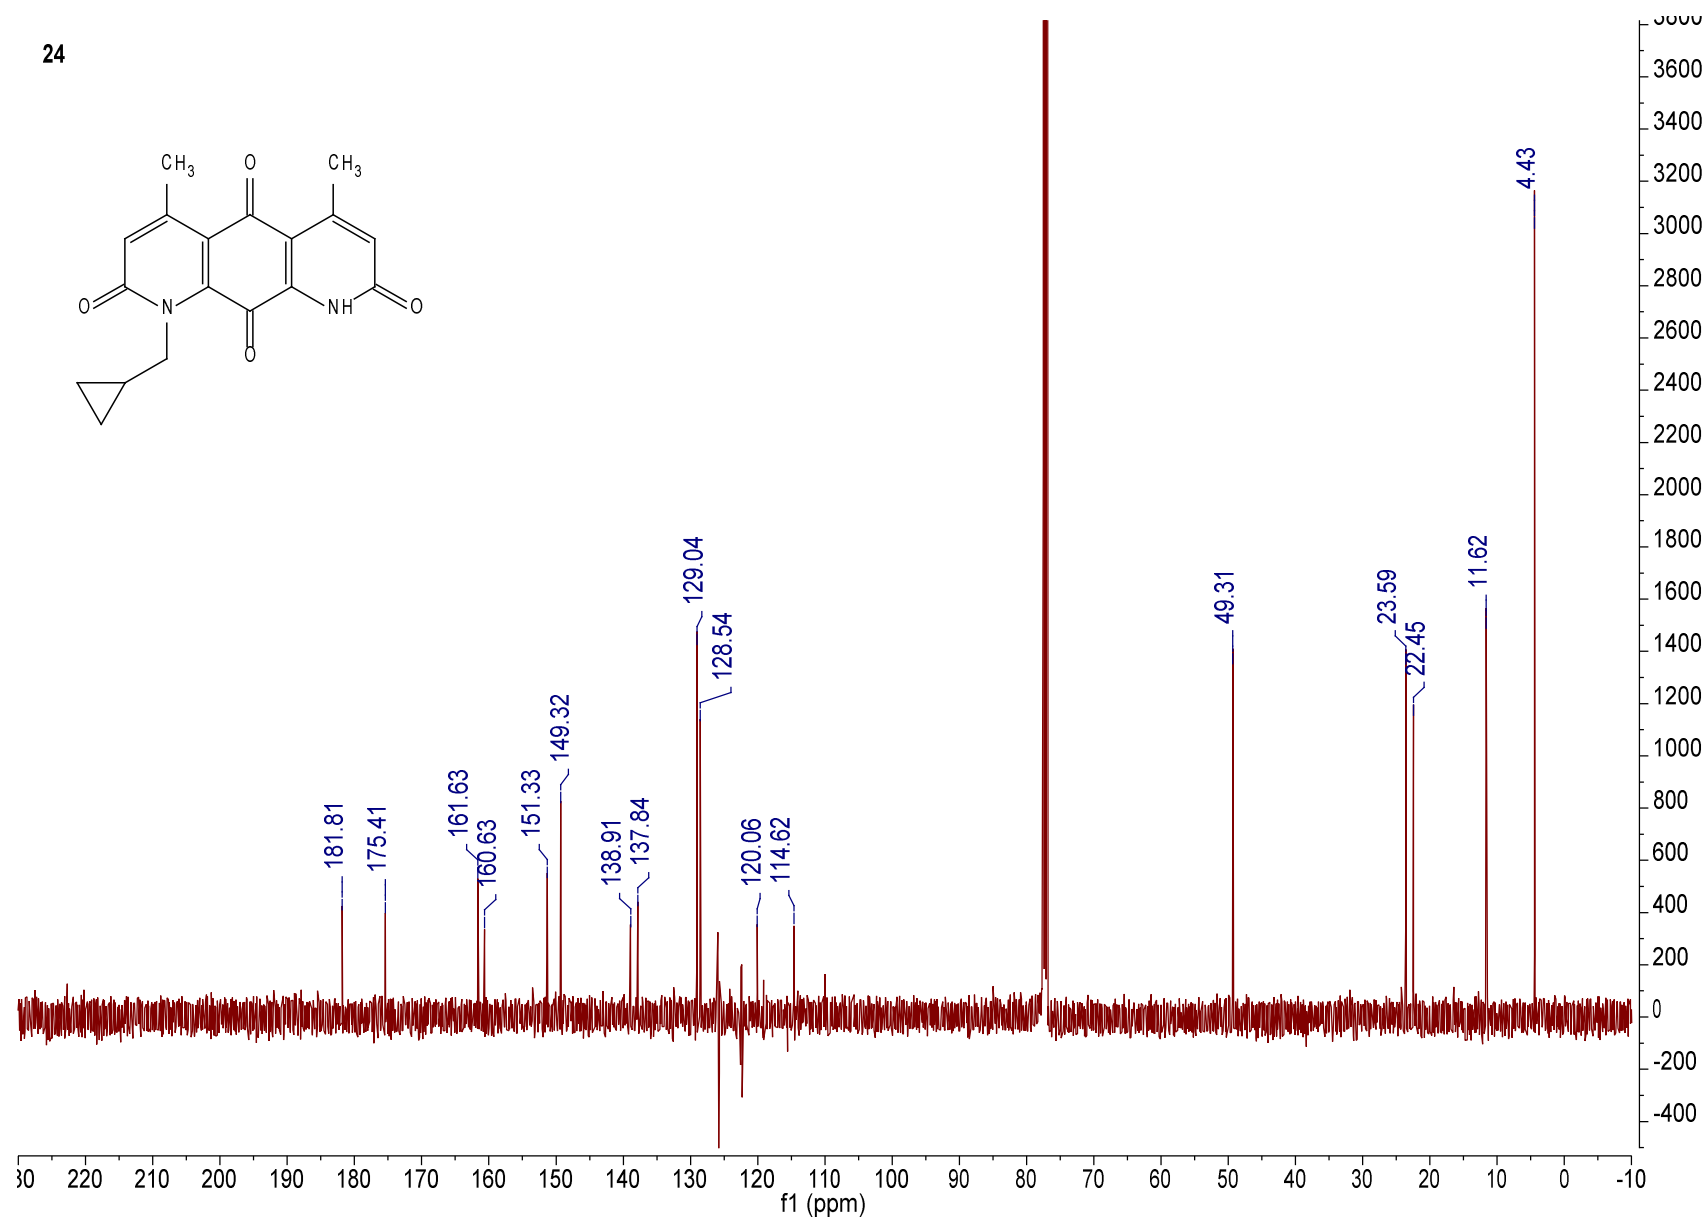

67

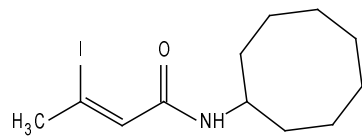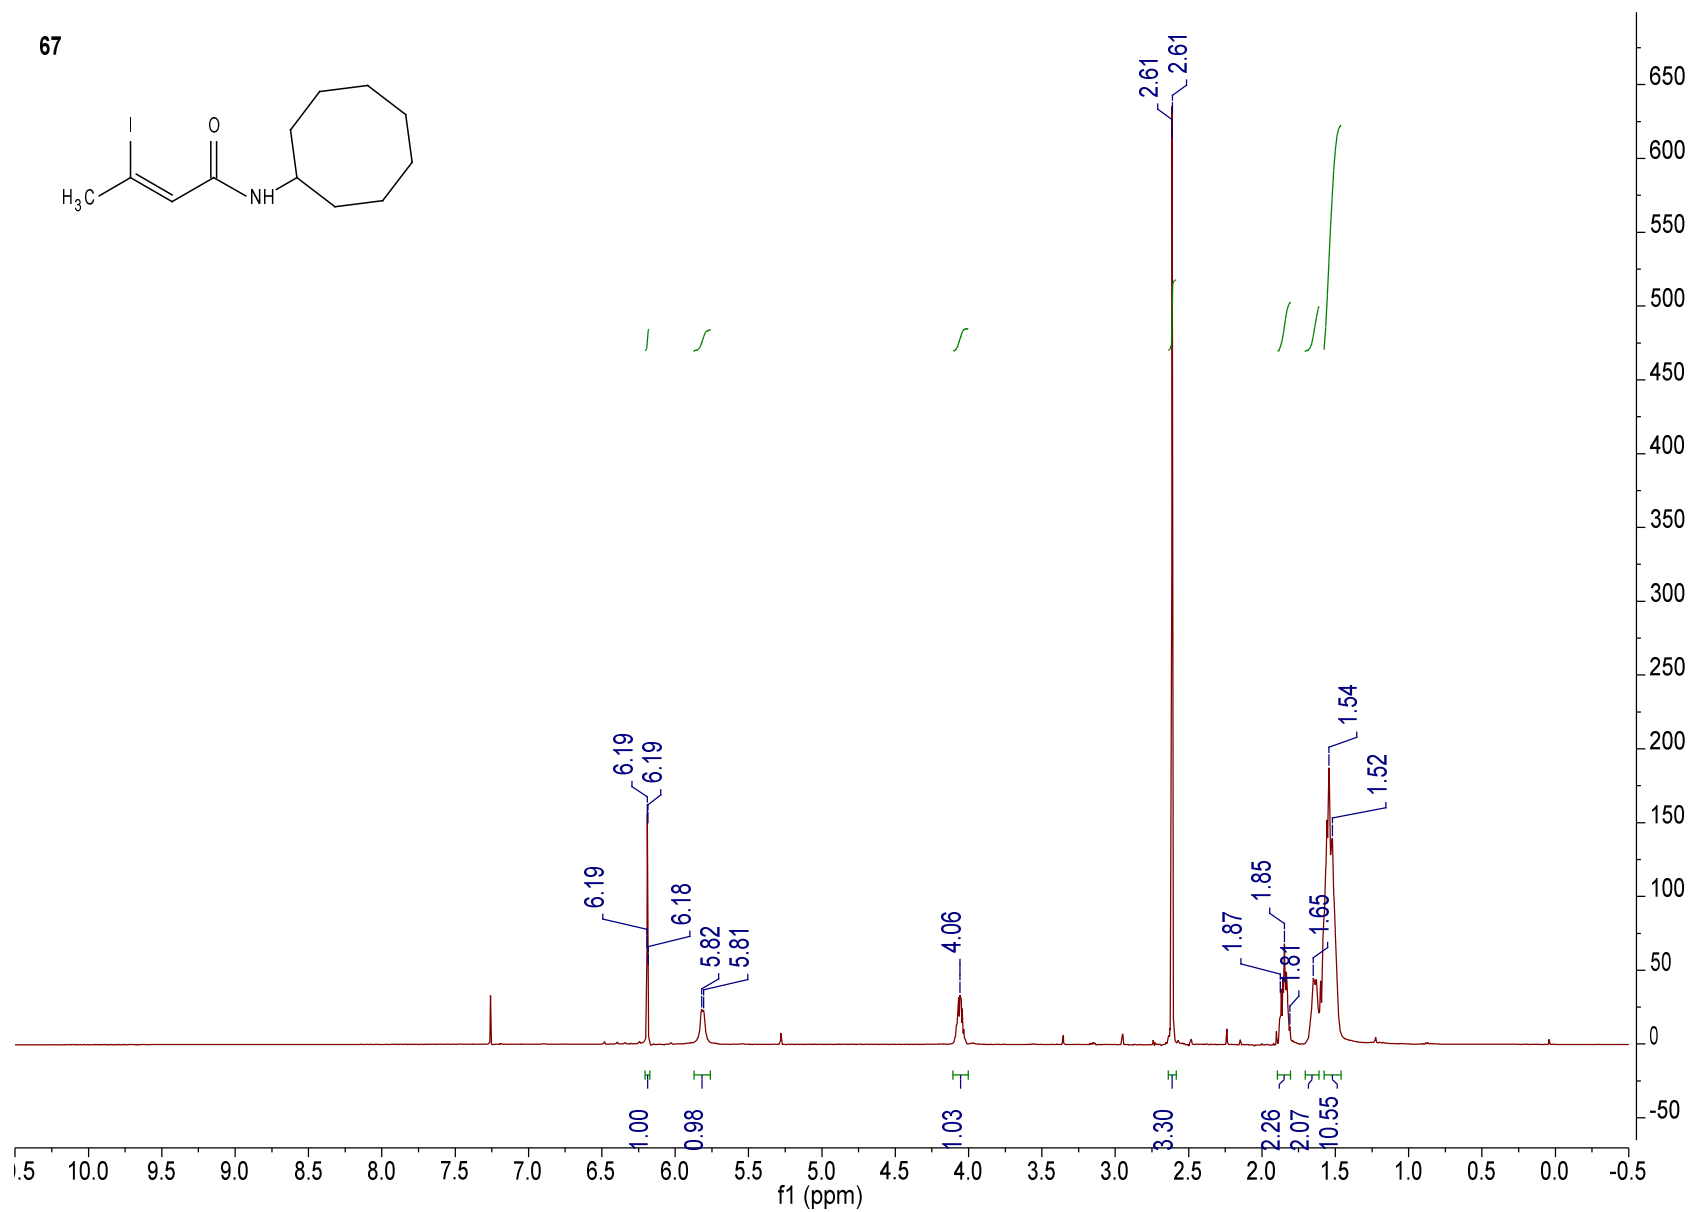

67

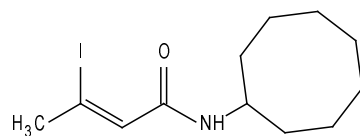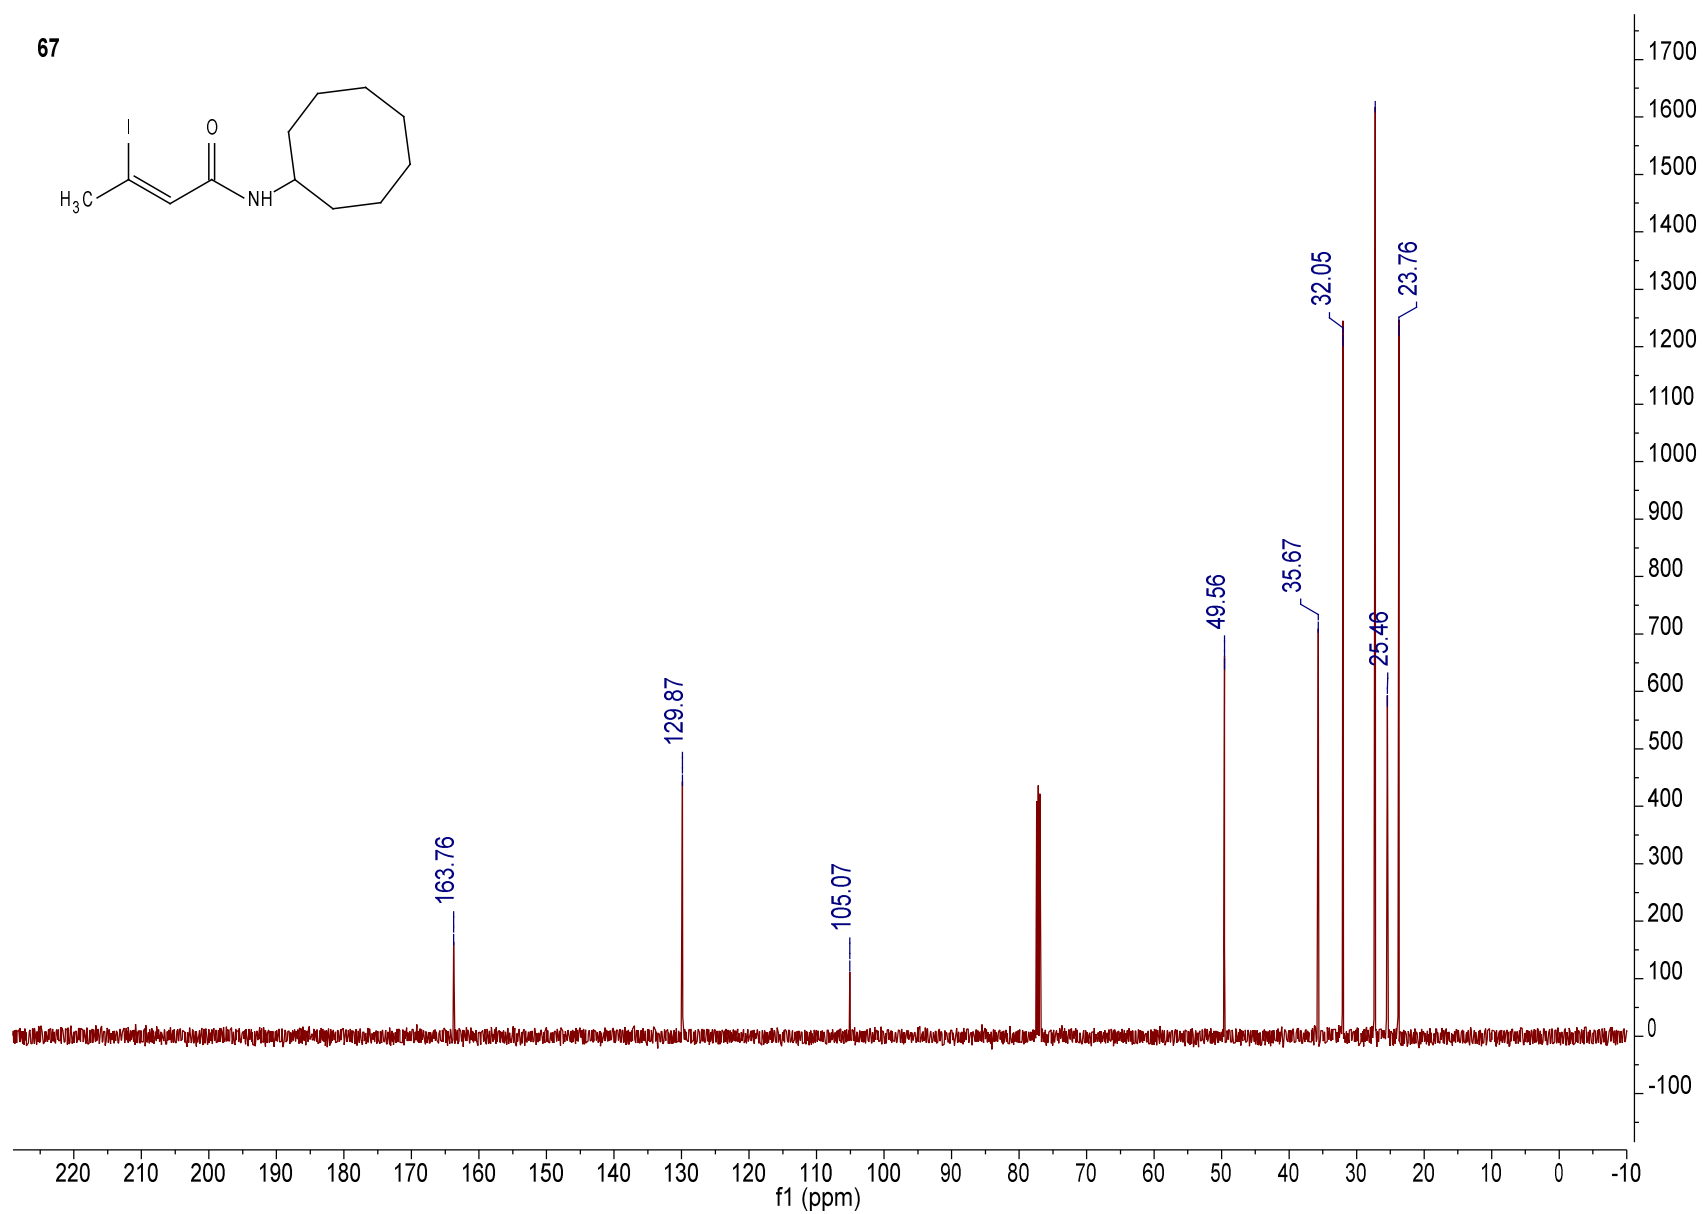

25

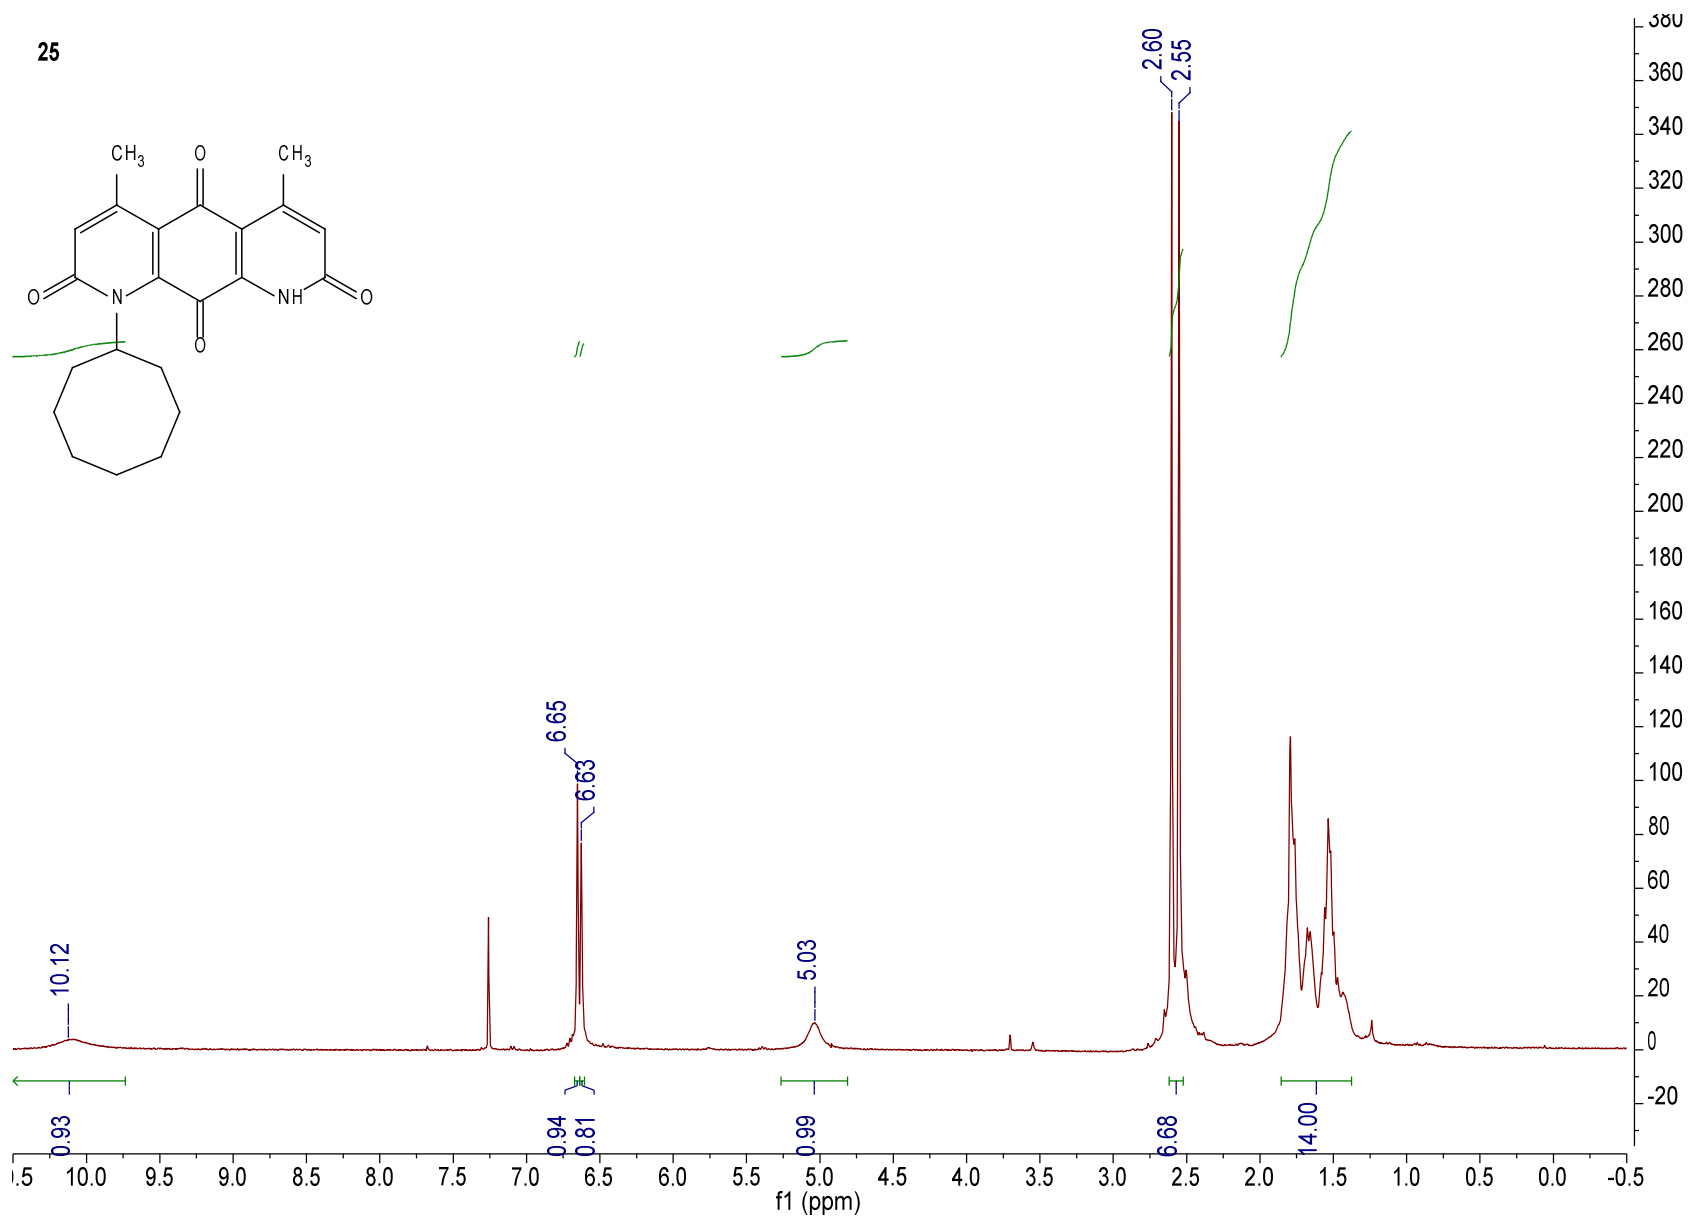



25

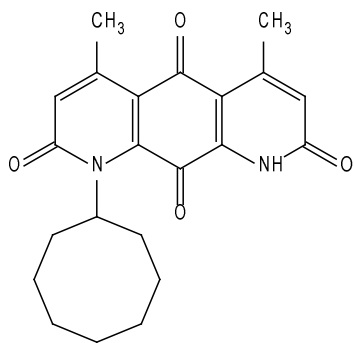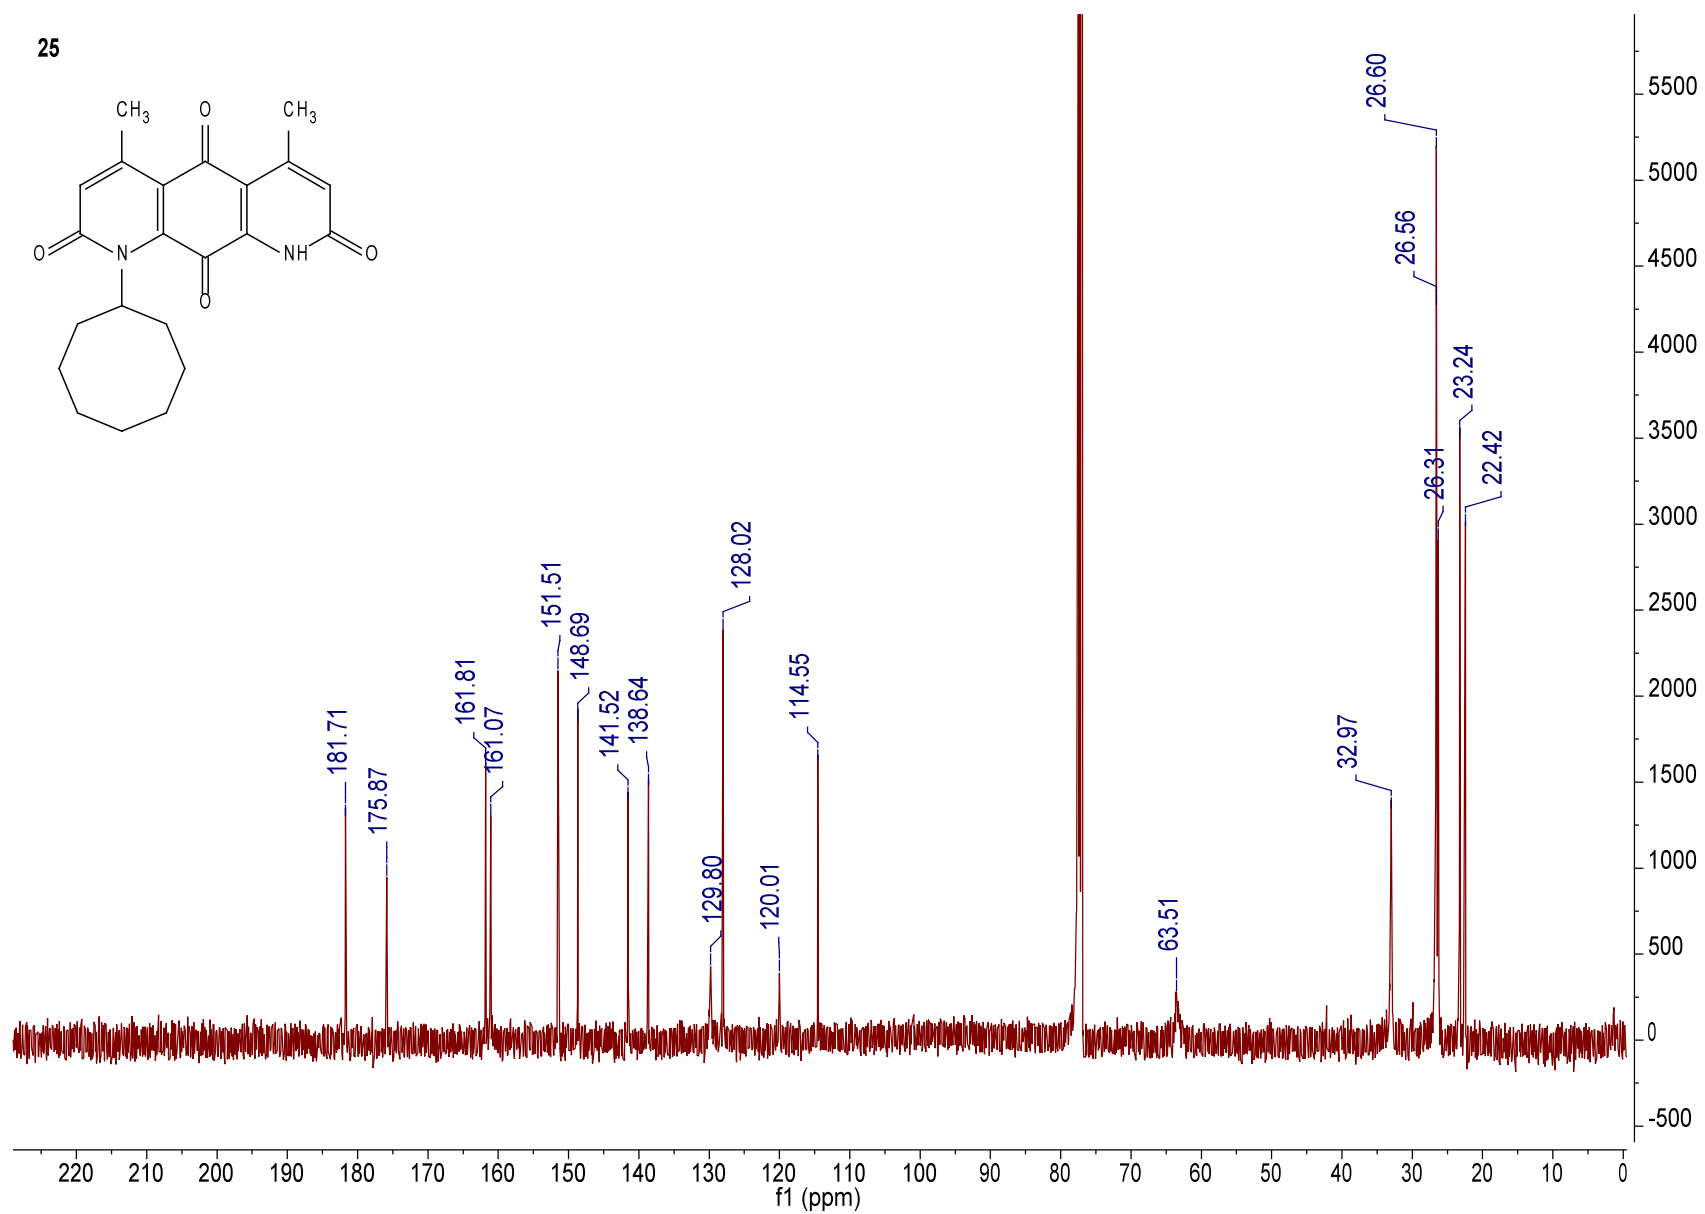

68

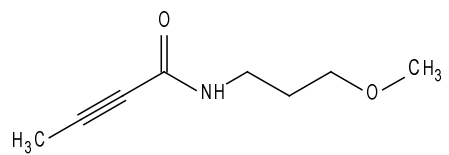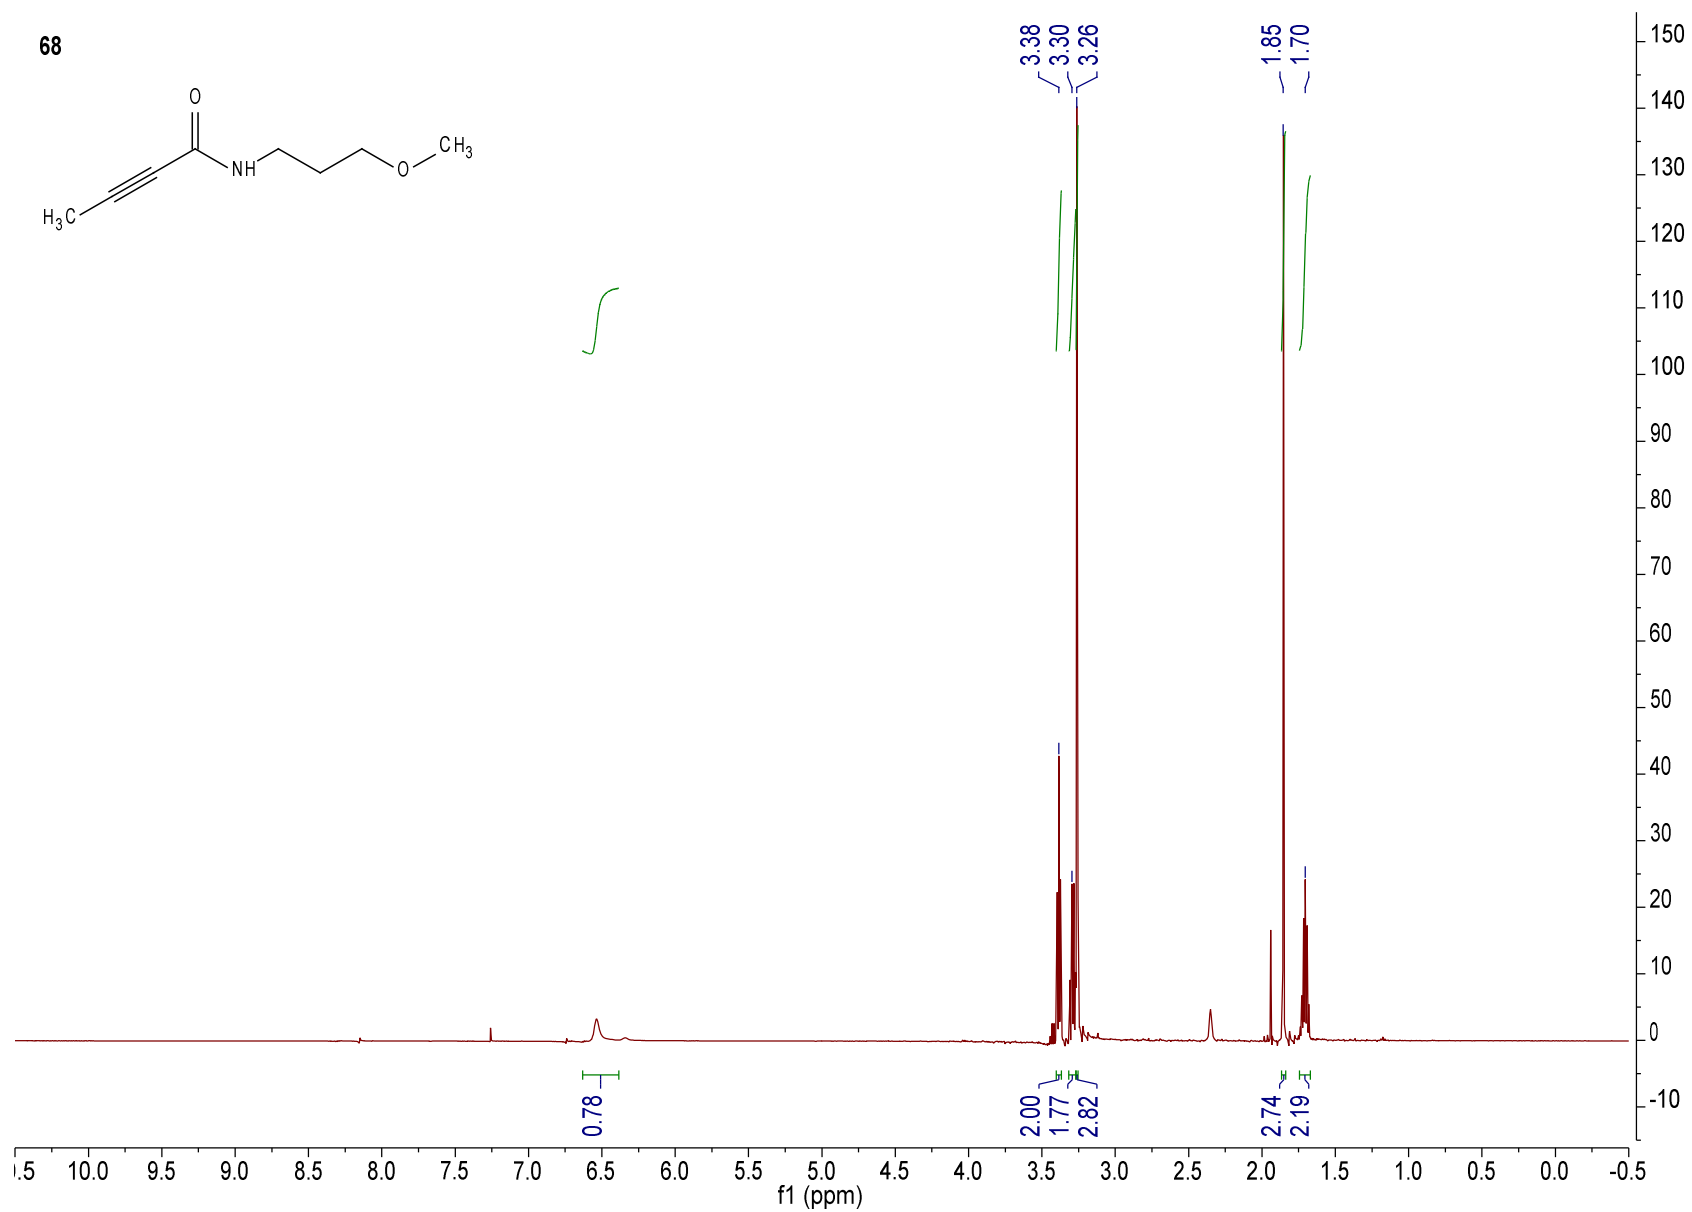

68

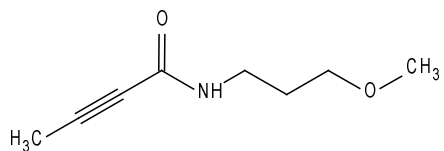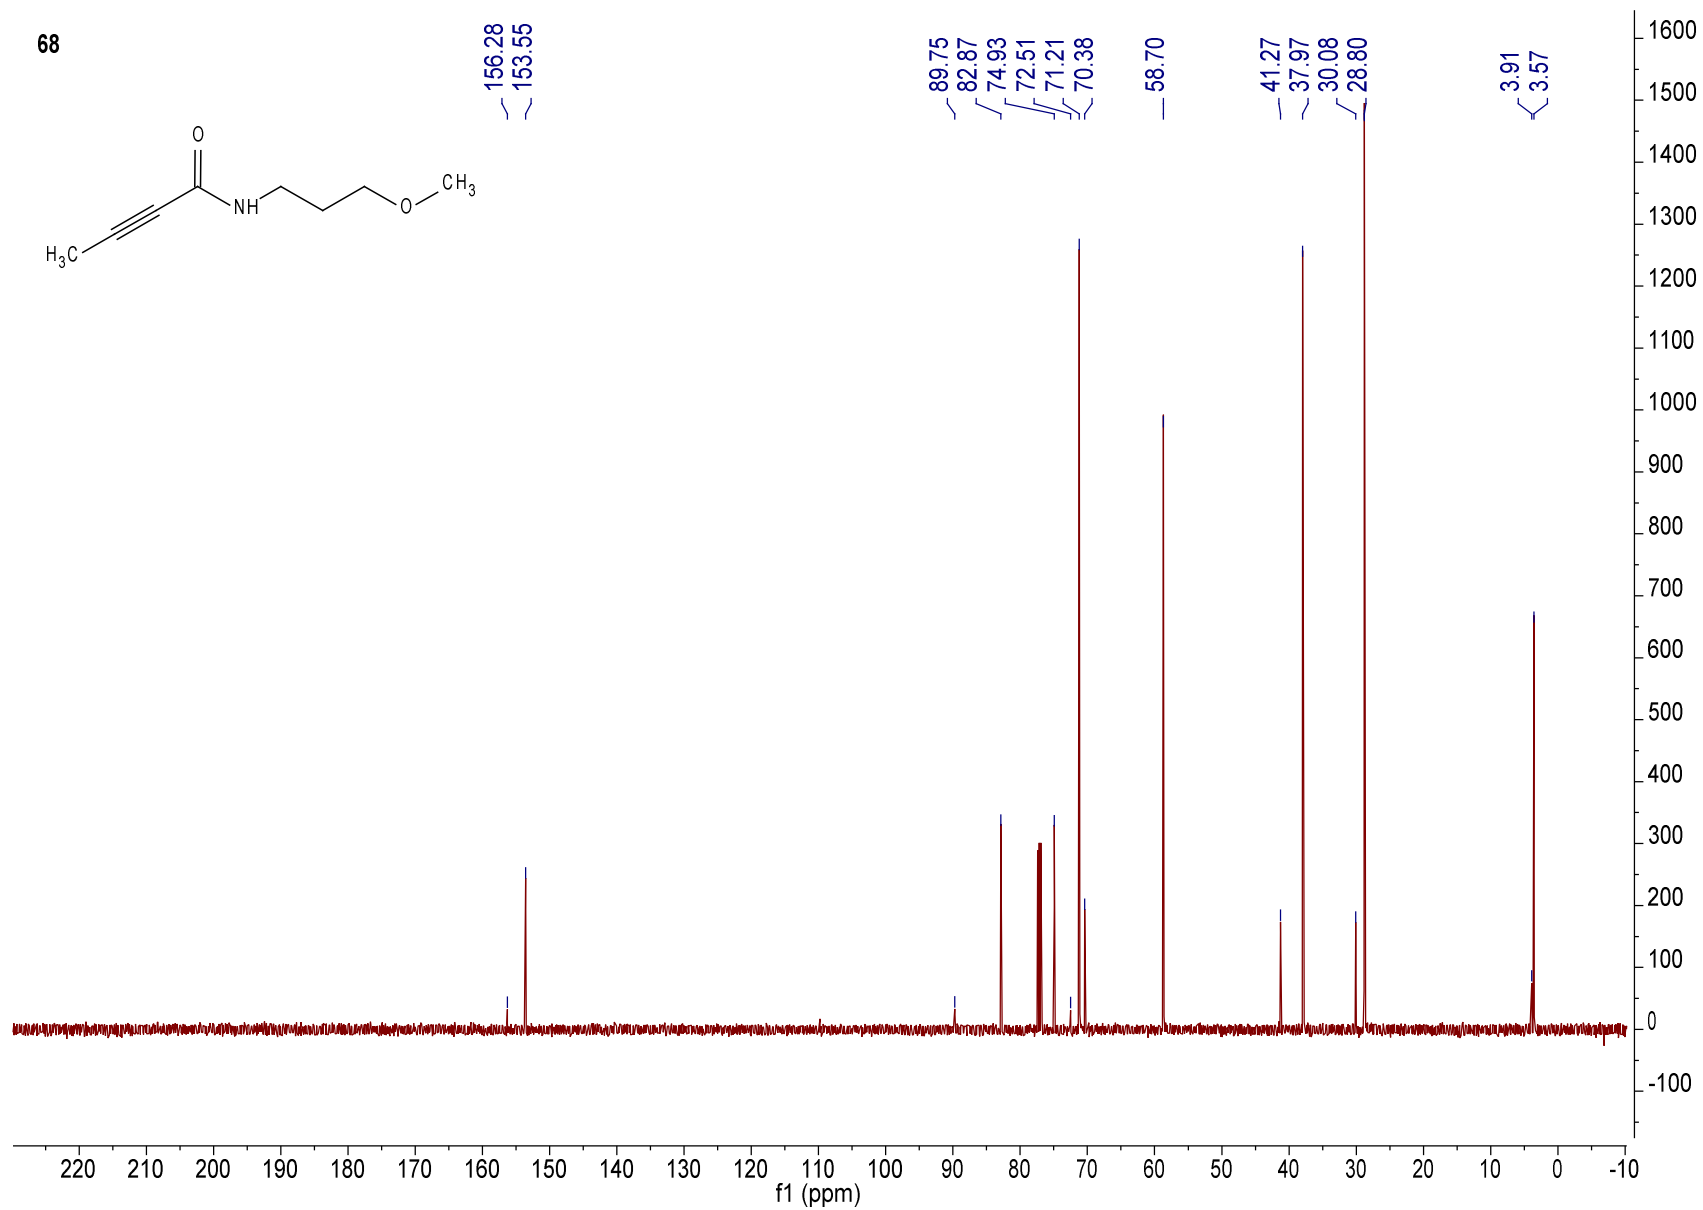

69

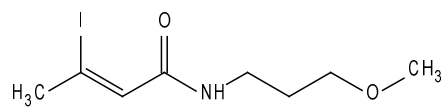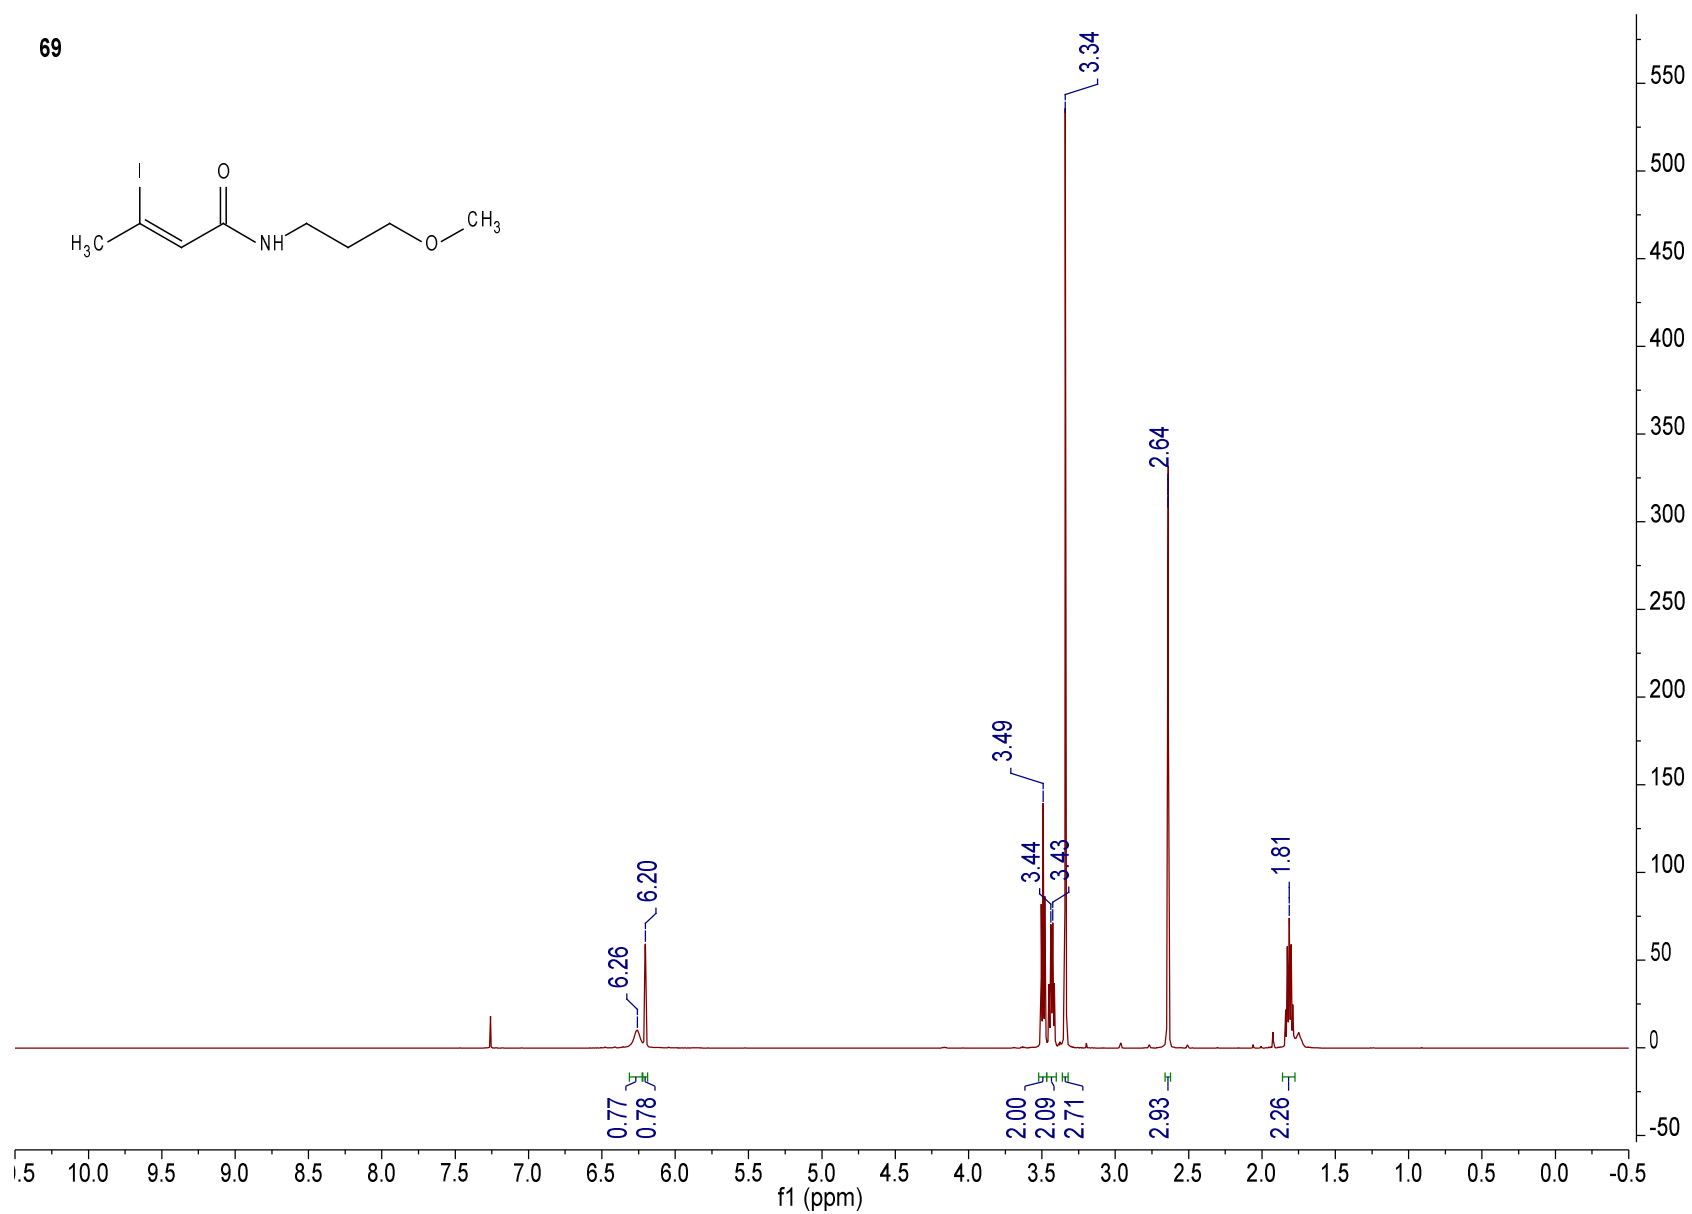

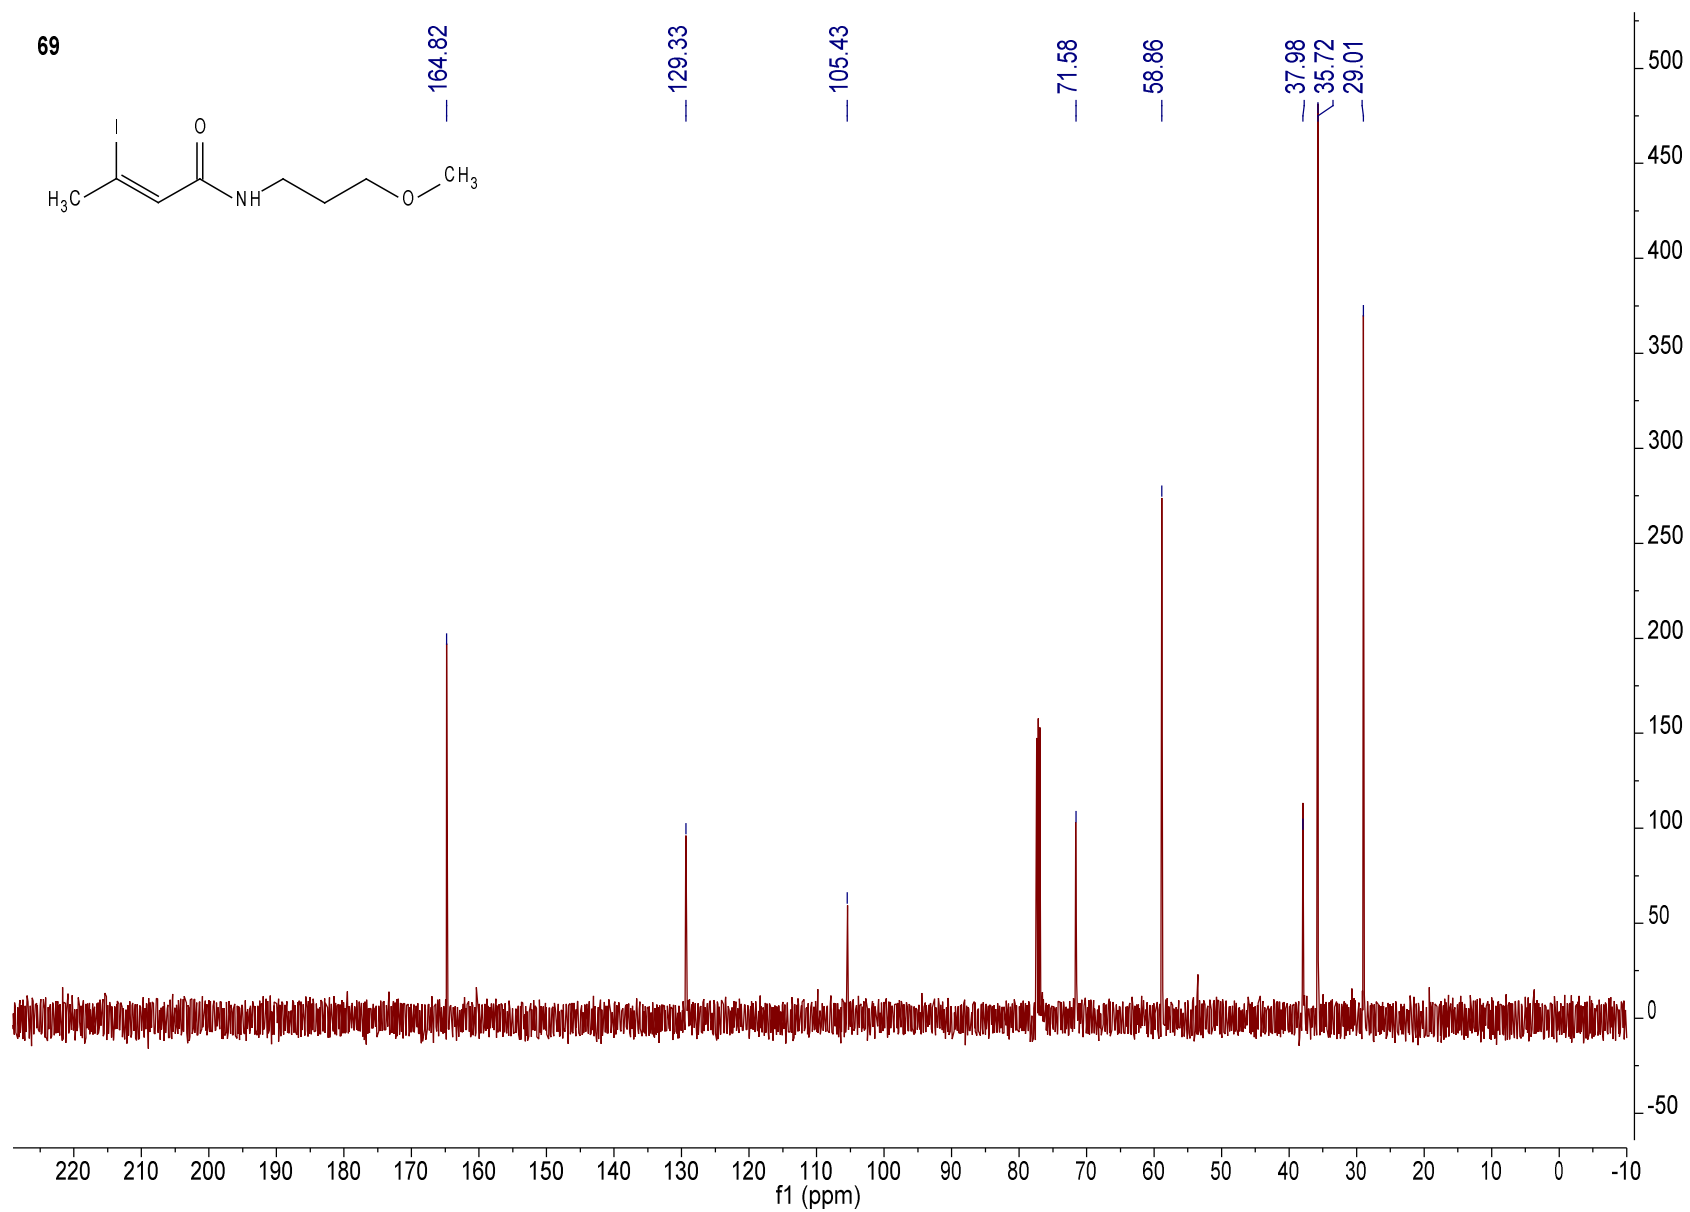

26

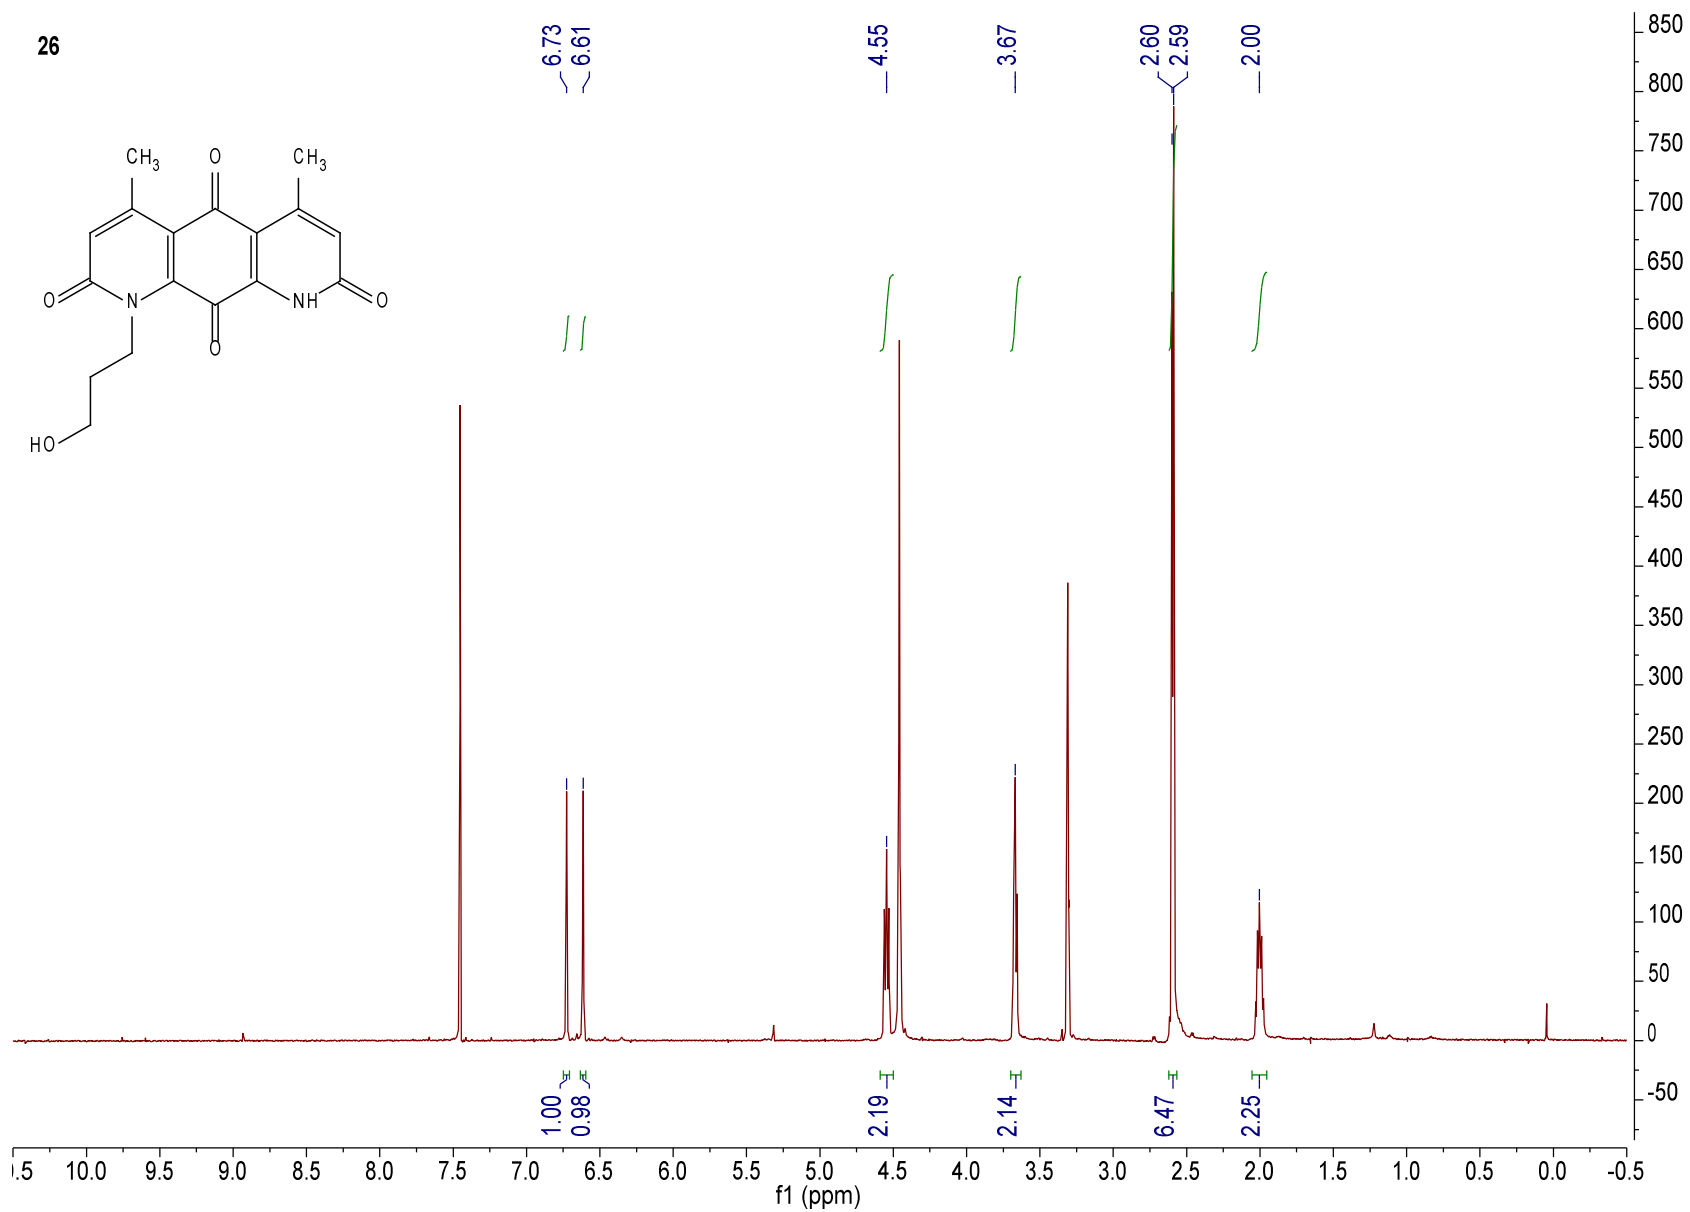

26

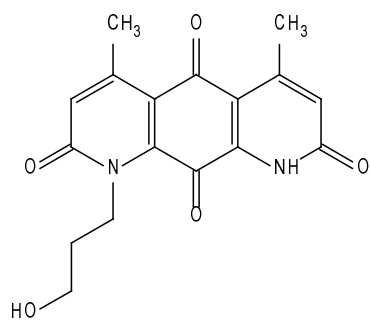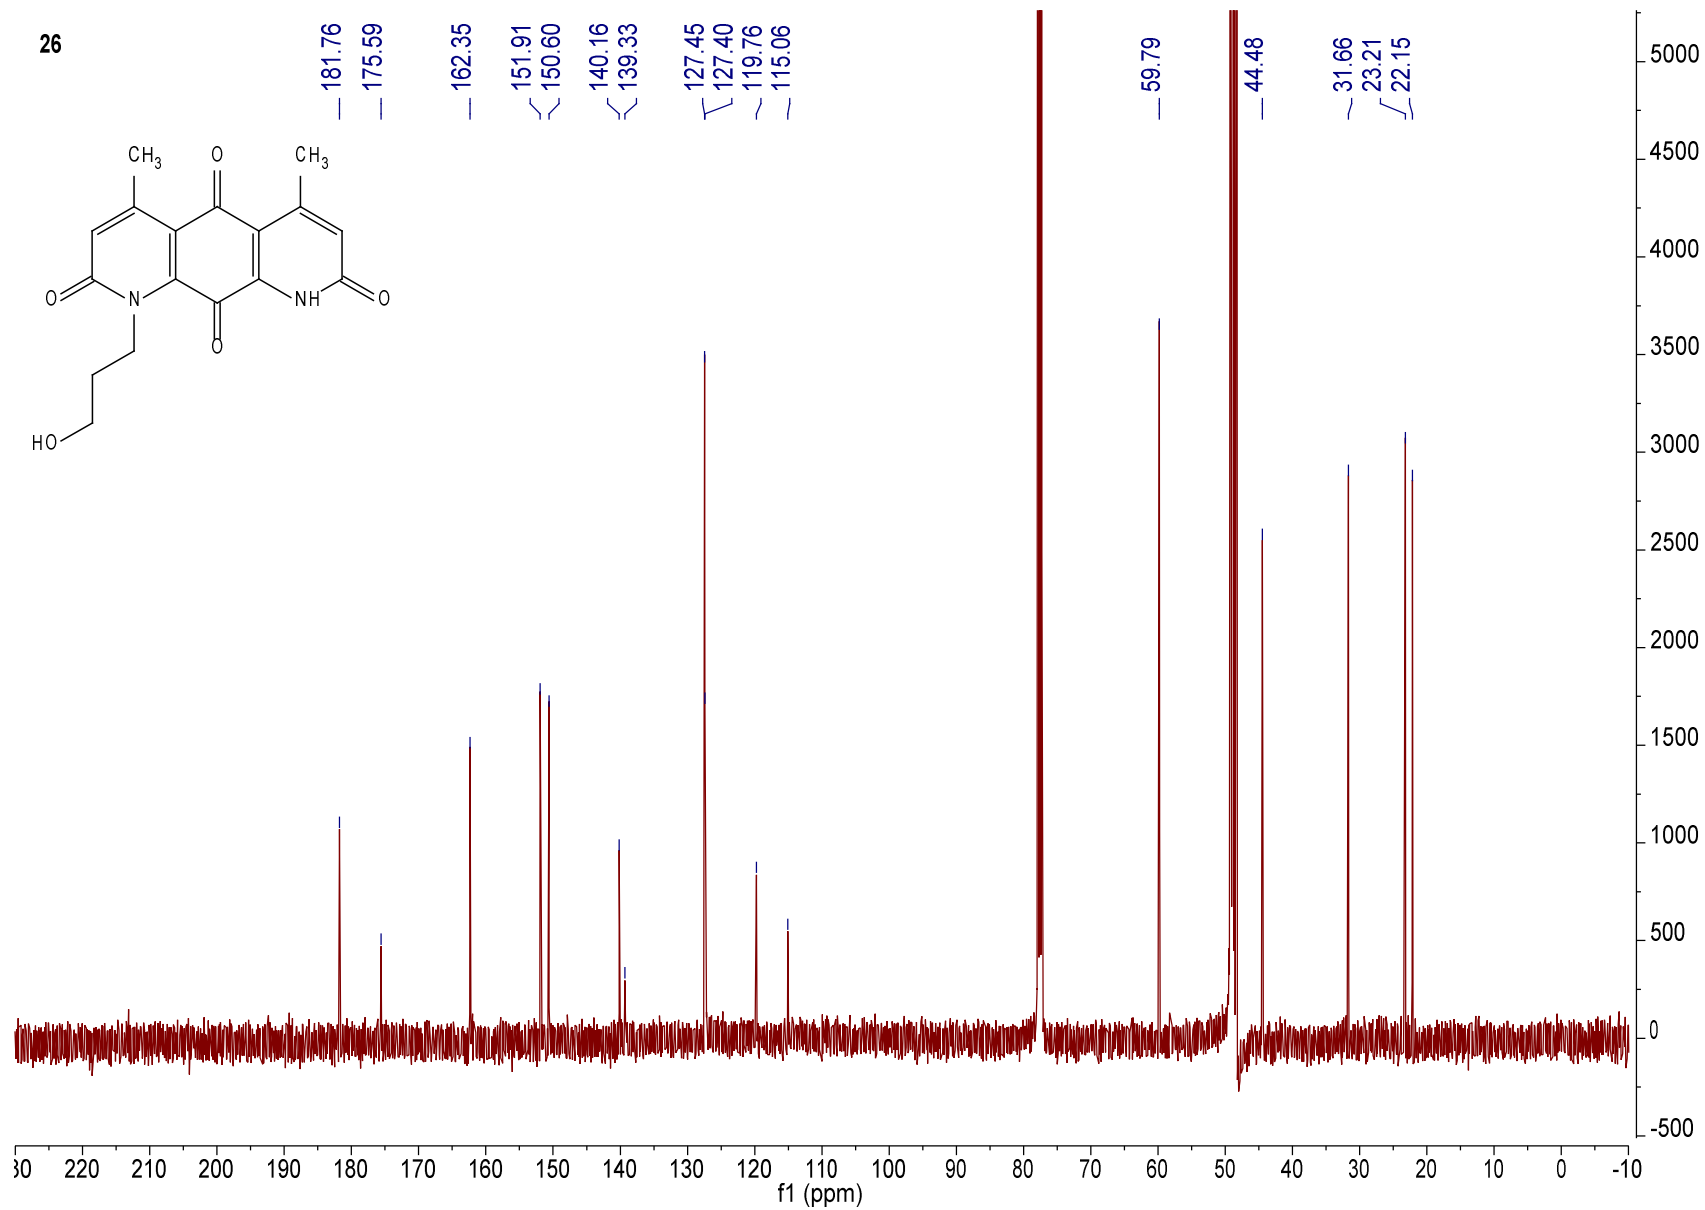





## References

1. Bair, J. S.; Palchaudhuri, R.; Hergenrother, P. J., Chemistry and biology of deoxynyboquinone, a potent inducer of cancer cell death. *J Am Chem Soc* **2010**, *132* (15), 5469-78.
